# Supplementary material
Source: PubMed Central journal article supplement (PMC3713616)
Supplement: NIHMS492344-supplement-4_si_001.pdf [file NIHMS492344-supplement-4_si_001.pdf]

## Nucleophilic addition to silyl-protected five-membered ring oxocarbenium ions governed by stereoelectronic effects

Vi Tuong Tran and K. A. Woerpel

Department of Chemistry, New York University, 100 Washington Square East, New York, NY 10003 USA

### Supporting Information

#### Table of Contents:

|      |                                                |      |
|------|------------------------------------------------|------|
| I.   | General Procedures                             | S-1  |
| II.  | X-ray Crystallographic Data                    | S-2  |
|      | a. <b>44</b>                                   |      |
|      | b. <b>46</b>                                   |      |
|      | c. <b>48</b>                                   |      |
| III. | Details of Computation                         | S-39 |
| IV.  | References                                     | S-46 |
| V.   | <sup>1</sup> H and <sup>13</sup> C NMR Spectra | S-47 |

#### I. General Procedures.

Liquid chromatography was performed using forced flow (flash chromatography) of the indicated solvent system on silica gel (SiO<sub>2</sub>) 60 (230-400 mesh). <sup>1</sup>H NMR and <sup>13</sup>C NMR spectra were recorded at ambient temperature using 400 (400 and 100 MHz, respectively), 500 (500 and 125 MHz, respectively) or 600 (600 and 150 MHz, respectively) spectrometers, as indicated. The data are reported as follows: chemical shift in ppm from internal tetramethylsilane on the δ scale, multiplicity (app = apparent, br = broad, s = singlet, d = doublet, t = triplet, q = quartet, quint = quintet, sext = sextet, m = multiplet), coupling constants (Hz), and integration. Due to difficulties with purification of certain products, only distinctive peaks are listed in tabulated <sup>1</sup>H NMR spectral data as indicated, and the structures were assigned using a combination of COSY, HMQC, and nOe experiments. Proton count at each carbon was confirmed by HSQC. Gas chromatography–mass spectrometry (GC–MS) was performed with a quadrupole system with a fused silica capillary column (30 m x 0.32 mm x 0.25 μm) wall-coated with DB-5 using electron ionization (70 eV). High resolution mass spectra (HRMS) were acquired on a quadrupole time-of-flight spectrometer or an orthogonal acceleration time-of-flight spectrometer and were obtained by peak matching. Optical rotations were obtained using a digital polarimeter and concentrations were reported in g/100 mL. Specific rotations were assumed to be constant over a small range of concentrations. Analytical thin layer chromatography was performed on silica gel 60 F<sub>254</sub> plates. THF, DMF, and CH<sub>2</sub>Cl<sub>2</sub> were dried by filtration through alumina according to the method of Grubbs.<sup>1</sup> All reactions using Et<sub>2</sub>O, THF, DMF, and CH<sub>2</sub>Cl<sub>2</sub> as solvents were run under an atmosphere of nitrogen in glassware that was flame-dried under a stream of nitrogen.

## II. X-ray Crystallographic Data

### Chemical Correlation:

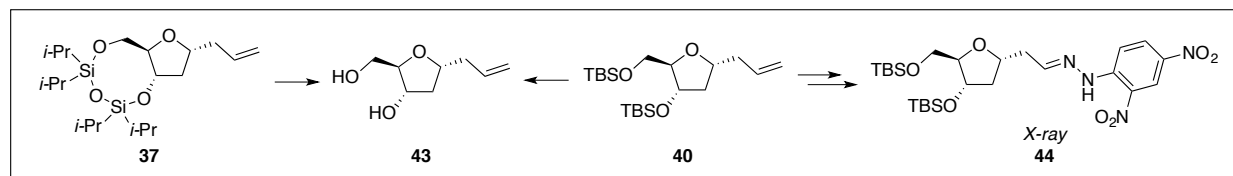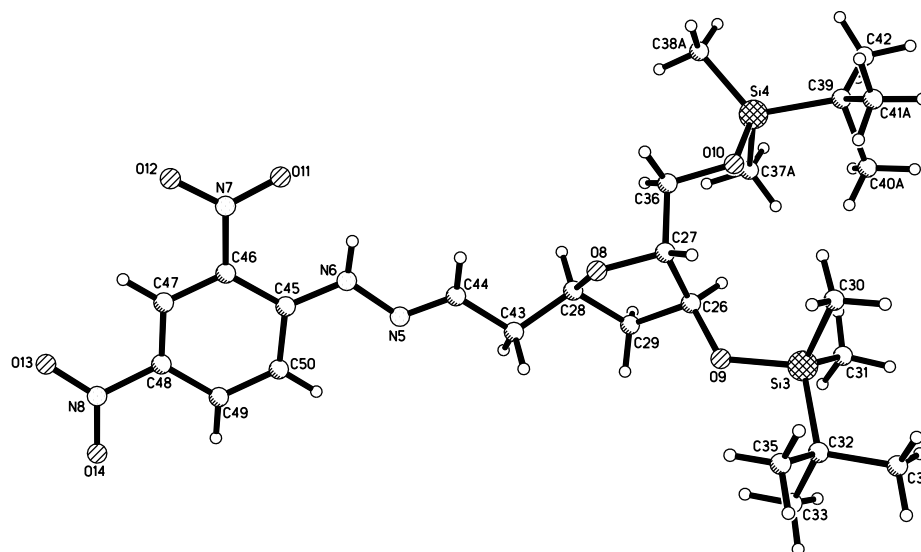

### X-ray Data Collection, Structure Solution and Refinement for 44.

A yellow crystal of approximate dimensions 0.060 x 0.259 x 0.315 mm was mounted on a glass fiber and transferred to a Bruker SMART APEX II diffractometer. The APEX2<sup>1</sup> program package was used to determine the unit-cell parameters and for data collection (45 sec/frame scan time for a sphere of diffraction data). The raw frame data was processed using SAINT<sup>2</sup> and SADABS<sup>3</sup> to yield the reflection data file. Subsequent calculations were carried out using the SHELXTL<sup>4</sup> program. There were no systematic absences. The noncentrosymmetric triclinic space group *P*1 was assigned and later determined to be correct.

The structure was solved by direct methods and refined on  $F^2$  by full-matrix least-squares techniques<sup>5</sup>. The analytical scattering factors<sup>6</sup> for neutral atoms were used throughout the analysis. Hydrogen atoms were included using a riding model. There were two molecules of the formula-unit present. Carbon atoms C(37), C(38), C(40) and C(41) were disordered and included using multiple components with partial site-occupancy-factors.

At convergence,  $wR2 = 0.1251$  and  $Goof = 1.018$  for 747 variables (3 restraints) refined against 14227 data (0.74Å),  $R1 = 0.0464$  for those 13387 data with  $I > 2.0\sigma(I)$ . The absolute structure was assigned by refinement of the Flack parameter<sup>6</sup>

## References.

1. APEX2 Version 2010.3-0, Bruker AXS, Inc.; Madison, WI 2010.
2. SAINT Version 7.68a, Bruker AXS, Inc.; Madison, WI 2009.
3. Sheldrick, G. M. SADABS, Version 2008/1, Bruker AXS, Inc.; Madison, WI 2008.
4. Sheldrick, G. M. SHELXTL, Version 2008/4, Bruker AXS, Inc.; Madison, WI 2008.
5. Sheldrick, G. M. SHELXL-2012/9
6. International Tables for X-Ray Crystallography 1992, Vol. C., Dordrecht: Kluwer Academic Publishers
7. Flack, H. D. Acta. Cryst., A39, 876-881, 1983.

## Definitions:

$$wR2 = [\Sigma[w(F_o^2 - F_c^2)^2] / \Sigma[w(F_o^2)^2]]^{1/2}$$

$$R1 = \Sigma||F_o| - |F_c|| / \Sigma|F_o|$$

Goof = S =  $[\Sigma[w(F_o^2 - F_c^2)^2] / (n-p)]^{1/2}$  where n is the number of reflections and p is the total number of parameters refined.

The thermal ellipsoid plot is shown at the 50% probability level.

Table 1. Crystal data and structure refinement for **44**.

|                        |                                                                               |                  |
|------------------------|-------------------------------------------------------------------------------|------------------|
| Identification code    | kaw159 (Vi Tran)                                                              |                  |
| Empirical formula      | C <sub>25</sub> H <sub>44</sub> N <sub>4</sub> O <sub>7</sub> Si <sub>2</sub> |                  |
| Formula weight         | 568.82                                                                        |                  |
| Temperature            | 93(2) K                                                                       |                  |
| Wavelength             | 0.71073 Å                                                                     |                  |
| Crystal system         | Triclinic                                                                     |                  |
| Space group            | P1                                                                            |                  |
| Unit cell dimensions   | a = 7.0843(5) Å                                                               | α = 88.0590(8)°. |
|                        | b = 8.9087(6) Å                                                               | β = 89.2760(9)°. |
|                        | c = 24.7678(18) Å                                                             | γ = 88.0016(9)°. |
| Volume                 | 1561.19(19) Å <sup>3</sup>                                                    |                  |
| Z                      | 2                                                                             |                  |
| Density (calculated)   | 1.210 Mg/m <sup>3</sup>                                                       |                  |
| Absorption coefficient | 0.159 mm <sup>-1</sup>                                                        |                  |

|                                          |                                                             |
|------------------------------------------|-------------------------------------------------------------|
| F(000)                                   | 612                                                         |
| Crystal color                            | yellow                                                      |
| Crystal size                             | 0.315 x 0.259 x 0.060 mm <sup>3</sup>                       |
| Theta range for data collection          | 2.289 to 28.923°                                            |
| Index ranges                             | -9 ≤ <i>h</i> ≤ 9, -12 ≤ <i>k</i> ≤ 11, -33 ≤ <i>l</i> ≤ 32 |
| Reflections collected                    | 18757                                                       |
| Independent reflections                  | 14227 [R(int) = 0.0103]                                     |
| Completeness to theta = 25.500°          | 99.7 %                                                      |
| Absorption correction                    | Numerical                                                   |
| Max. and min. transmission               | 1.0000 and 0.9245                                           |
| Refinement method                        | Full-matrix least-squares on F <sup>2</sup>                 |
| Data / restraints / parameters           | 14227 / 3 / 747                                             |
| Goodness-of-fit on F <sup>2</sup>        | 1.018                                                       |
| Final R indices [I > 2σ(I) = 13387 data] | R1 = 0.0464, wR2 = 0.1216                                   |
| R indices (all data, 0.74Å)              | R1 = 0.0498, wR2 = 0.1251                                   |
| Absolute structure parameter             | 0.00(3)                                                     |
| Largest diff. peak and hole              | 0.681 and -0.416 e.Å <sup>-3</sup>                          |

Table 2. Atomic coordinates ( $\times 10^4$ ) and equivalent isotropic displacement parameters ( $\text{\AA}^2 \times 10^3$ ) for **44**. U(eq) is defined as one third of the trace of the orthogonalized U<sup>ij</sup> tensor.

|       | x        | y        | z        | U(eq) |
|-------|----------|----------|----------|-------|
| Si(1) | 1738(1)  | 3241(1)  | 8570(1)  | 30(1) |
| Si(2) | -1915(1) | -1329(1) | 10220(1) | 31(1) |
| O(1)  | 261(3)   | 2769(3)  | 10564(1) | 32(1) |
| O(2)  | 925(3)   | 3708(3)  | 9173(1)  | 33(1) |
| O(3)  | -920(3)  | 209(3)   | 9983(1)  | 34(1) |
| O(4)  | -152(3)  | 803(3)   | 13005(1) | 32(1) |
| O(5)  | 124(4)   | -951(4)  | 13617(1) | 53(1) |
| O(6)  | 5753(4)  | -3875(3) | 13875(1) | 42(1) |
| O(7)  | 7969(4)  | -3839(3) | 13269(1) | 42(1) |
| N(1)  | 3380(3)  | 1830(3)  | 11828(1) | 23(1) |
| N(2)  | 2509(3)  | 1202(3)  | 12282(1) | 23(1) |
| N(3)  | 762(4)   | -231(3)  | 13236(1) | 30(1) |
| N(4)  | 6452(4)  | -3361(3) | 13459(1) | 31(1) |
| C(1)  | 1264(4)  | 2774(3)  | 9645(1)  | 27(1) |
| C(2)  | -451(4)  | 2862(3)  | 10024(1) | 26(1) |
| C(3)  | 2289(4)  | 2629(3)  | 10542(1) | 25(1) |
| C(4)  | 2829(4)  | 3309(3)  | 9994(1)  | 27(1) |
| C(5)  | 621(7)   | 1489(5)  | 8369(2)  | 50(1) |
| C(6)  | 4344(6)  | 2914(5)  | 8592(2)  | 45(1) |
| C(7)  | 1073(6)  | 4894(5)  | 8116(2)  | 43(1) |
| C(8)  | 1965(8)  | 6304(6)  | 8308(2)  | 64(1) |
| C(9)  | -1097(7) | 5124(6)  | 8116(2)  | 60(1) |
| C(10) | 1741(9)  | 4574(8)  | 7537(2)  | 71(2) |

|        |           |           |          |        |
|--------|-----------|-----------|----------|--------|
| C(11)  | -1859(4)  | 1651(4)   | 9946(2)  | 31(1)  |
| C(12)  | 25(6)     | -2776(5)  | 10269(2) | 48(1)  |
| C(13)  | -2949(9)  | -997(7)   | 10898(2) | 72(2)  |
| C(14)  | -3745(5)  | -1859(5)  | 9708(2)  | 52(1)  |
| C(15)  | -2881(9)  | -1700(11) | 9130(3)  | 91(2)  |
| C(16)  | -4405(9)  | -3442(6)  | 9838(5)  | 136(5) |
| C(17)  | -5484(6)  | -834(5)   | 9728(2)  | 48(1)  |
| C(18)  | 3058(5)   | 3404(3)   | 11027(1) | 27(1)  |
| C(19)  | 2319(4)   | 2706(3)   | 11540(1) | 26(1)  |
| C(20)  | 3444(4)   | 133(3)    | 12577(1) | 21(1)  |
| C(21)  | 2655(4)   | -611(3)   | 13039(1) | 24(1)  |
| C(22)  | 3649(5)   | -1743(3)  | 13328(1) | 26(1)  |
| C(23)  | 5444(5)   | -2145(3)  | 13165(1) | 26(1)  |
| C(24)  | 6296(4)   | -1447(4)  | 12714(1) | 27(1)  |
| C(25)  | 5321(4)   | -336(3)   | 12427(1) | 24(1)  |
| Si(3)  | -3099(2)  | -1549(1)  | 16550(1) | 38(1)  |
| Si(4)  | 287(1)    | -5358(1)  | 15059(1) | 35(1)  |
| O(8)   | -2304(4)  | -51(2)    | 14793(1) | 34(1)  |
| O(9)   | -3798(4)  | -922(3)   | 15944(1) | 40(1)  |
| O(10)  | 32(5)     | -3602(3)  | 15222(1) | 45(1)  |
| O(11)  | -1575(3)  | 3290(3)   | 12386(1) | 33(1)  |
| O(12)  | -1826(4)  | 4954(3)   | 11735(1) | 41(1)  |
| O(13)  | -7408(4)  | 7908(3)   | 11435(1) | 46(1)  |
| O(14)  | -9647(3)  | 7922(3)   | 12035(1) | 37(1)  |
| N(5)   | -5257(4)  | 2295(3)   | 13532(1) | 24(1)  |
| N(6)   | -4305(3)  | 2920(3)   | 13091(1) | 21(1)  |
| N(7)   | -2489(4)  | 4287(3)   | 12132(1) | 26(1)  |
| N(8)   | -8142(4)  | 7428(3)   | 11851(1) | 30(1)  |
| C(26)  | -3468(6)  | -1737(4)  | 15462(1) | 35(1)  |
| C(27)  | -1685(6)  | -1239(4)  | 15164(1) | 35(1)  |
| C(28)  | -4052(6)  | -511(4)   | 14580(1) | 36(1)  |
| C(29)  | -5052(6)  | -1333(4)  | 15058(2) | 39(1)  |
| C(30)  | -520(9)   | -1715(10) | 16565(2) | 87(2)  |
| C(31)  | -4071(14) | -3412(7)  | 16706(2) | 100(3) |
| C(32)  | -4004(8)  | -138(6)   | 17035(2) | 60(1)  |
| C(33)  | -6153(12) | 0(15)     | 17018(3) | 137(5) |
| C(34)  | -3445(12) | -627(7)   | 17616(2) | 86(2)  |
| C(35)  | -3218(17) | 1403(7)   | 16892(3) | 124(4) |
| C(36)  | -690(6)   | -2476(4)  | 14852(2) | 42(1)  |
| C(37A) | -2309(10) | -6008(9)  | 15128(5) | 50(3)  |
| C(38A) | 1069(14)  | -5673(11) | 14384(3) | 52(3)  |
| C(37B) | -1483(17) | -6246(11) | 14683(5) | 63(4)  |
| C(38B) | 2422(16)  | -5171(10) | 14532(3) | 45(3)  |
| C(39)  | 1420(7)   | -6370(4)  | 15639(2) | 47(1)  |
| C(40A) | -513(13)  | -6545(12) | 16053(4) | 64(3)  |
| C(41A) | 2702(10)  | -5505(10) | 15956(3) | 45(2)  |

|        |          |           |          |       |
|--------|----------|-----------|----------|-------|
| C(40B) | 1145(16) | -5909(10) | 16175(3) | 47(3) |
| C(41B) | 3764(12) | -5987(9)  | 15488(4) | 43(2) |
| C(42)  | 1729(10) | -8015(5)  | 15550(2) | 64(1) |
| C(43)  | -5119(6) | 859(4)    | 14358(1) | 35(1) |
| C(44)  | -4218(5) | 1548(4)   | 13869(1) | 30(1) |
| C(45)  | -5215(4) | 3974(3)   | 12775(1) | 19(1) |
| C(46)  | -4382(4) | 4682(3)   | 12311(1) | 20(1) |
| C(47)  | -5351(4) | 5789(3)   | 12006(1) | 22(1) |
| C(48)  | -7160(4) | 6210(3)   | 12154(1) | 23(1) |
| C(49)  | -8053(4) | 5535(3)   | 12603(1) | 24(1) |
| C(50)  | -7101(4) | 4441(3)   | 12906(1) | 22(1) |

Table 3. Bond lengths [ $\text{\AA}$ ] and angles [ $^\circ$ ] for **44**.

|             |          |
|-------------|----------|
| Si(1)-O(2)  | 1.655(3) |
| Si(1)-C(5)  | 1.859(4) |
| Si(1)-C(6)  | 1.861(4) |
| Si(1)-C(7)  | 1.872(4) |
| Si(2)-O(3)  | 1.650(2) |
| Si(2)-C(13) | 1.852(5) |
| Si(2)-C(12) | 1.853(4) |
| Si(2)-C(14) | 1.907(5) |
| O(1)-C(2)   | 1.435(4) |
| O(1)-C(3)   | 1.438(4) |
| O(2)-C(1)   | 1.431(4) |
| O(3)-C(11)  | 1.426(4) |
| O(4)-N(3)   | 1.236(4) |
| O(5)-N(3)   | 1.214(4) |
| O(6)-N(4)   | 1.220(4) |
| O(7)-N(4)   | 1.236(4) |
| N(1)-C(19)  | 1.271(4) |
| N(1)-N(2)   | 1.388(3) |
| N(2)-C(20)  | 1.343(4) |
| N(3)-C(21)  | 1.454(4) |
| N(4)-C(23)  | 1.456(4) |
| C(1)-C(4)   | 1.514(4) |
| C(1)-C(2)   | 1.527(4) |
| C(2)-C(11)  | 1.514(4) |
| C(3)-C(4)   | 1.517(4) |
| C(3)-C(18)  | 1.523(4) |
| C(7)-C(8)   | 1.519(7) |
| C(7)-C(10)  | 1.538(6) |
| C(7)-C(9)   | 1.543(6) |
| C(14)-C(17) | 1.509(6) |
| C(14)-C(16) | 1.523(7) |
| C(14)-C(15) | 1.556(9) |

|              |           |
|--------------|-----------|
| C(18)-C(19)  | 1.493(4)  |
| C(20)-C(21)  | 1.420(4)  |
| C(20)-C(25)  | 1.428(4)  |
| C(21)-C(22)  | 1.394(4)  |
| C(22)-C(23)  | 1.369(5)  |
| C(23)-C(24)  | 1.400(5)  |
| C(24)-C(25)  | 1.370(4)  |
| Si(3)-O(9)   | 1.658(3)  |
| Si(3)-C(30)  | 1.829(6)  |
| Si(3)-C(31)  | 1.846(5)  |
| Si(3)-C(32)  | 1.861(5)  |
| Si(4)-O(10)  | 1.632(3)  |
| Si(4)-C(38A) | 1.782(8)  |
| Si(4)-C(37B) | 1.792(9)  |
| Si(4)-C(39)  | 1.847(4)  |
| Si(4)-C(37A) | 1.952(8)  |
| Si(4)-C(38B) | 1.993(9)  |
| O(8)-C(28)   | 1.430(5)  |
| O(8)-C(27)   | 1.439(4)  |
| O(9)-C(26)   | 1.430(4)  |
| O(10)-C(36)  | 1.422(4)  |
| O(11)-N(7)   | 1.240(3)  |
| O(12)-N(7)   | 1.228(4)  |
| O(13)-N(8)   | 1.221(4)  |
| O(14)-N(8)   | 1.228(4)  |
| N(5)-C(44)   | 1.275(4)  |
| N(5)-N(6)    | 1.386(3)  |
| N(6)-C(45)   | 1.354(4)  |
| N(7)-C(46)   | 1.443(4)  |
| N(8)-C(48)   | 1.460(4)  |
| C(26)-C(27)  | 1.527(5)  |
| C(26)-C(29)  | 1.539(5)  |
| C(27)-C(36)  | 1.516(5)  |
| C(28)-C(43)  | 1.505(5)  |
| C(28)-C(29)  | 1.547(5)  |
| C(32)-C(33)  | 1.525(10) |
| C(32)-C(35)  | 1.528(10) |
| C(32)-C(34)  | 1.541(6)  |
| C(39)-C(40B) | 1.413(9)  |
| C(39)-C(41A) | 1.465(9)  |
| C(39)-C(42)  | 1.497(6)  |
| C(39)-C(40A) | 1.709(9)  |
| C(39)-C(41B) | 1.740(10) |
| C(43)-C(44)  | 1.486(5)  |
| C(45)-C(50)  | 1.423(4)  |
| C(45)-C(46)  | 1.424(4)  |

|                   |            |
|-------------------|------------|
| C(46)-C(47)       | 1.389(4)   |
| C(47)-C(48)       | 1.371(4)   |
| C(48)-C(49)       | 1.401(4)   |
| C(49)-C(50)       | 1.372(4)   |
| O(2)-Si(1)-C(5)   | 109.21(16) |
| O(2)-Si(1)-C(6)   | 109.87(16) |
| C(5)-Si(1)-C(6)   | 109.2(2)   |
| O(2)-Si(1)-C(7)   | 104.44(16) |
| C(5)-Si(1)-C(7)   | 112.5(2)   |
| C(6)-Si(1)-C(7)   | 111.49(19) |
| O(3)-Si(2)-C(13)  | 109.8(3)   |
| O(3)-Si(2)-C(12)  | 105.41(16) |
| C(13)-Si(2)-C(12) | 110.2(2)   |
| O(3)-Si(2)-C(14)  | 107.37(18) |
| C(13)-Si(2)-C(14) | 112.9(3)   |
| C(12)-Si(2)-C(14) | 110.9(2)   |
| C(2)-O(1)-C(3)    | 109.0(2)   |
| C(1)-O(2)-Si(1)   | 122.0(2)   |
| C(11)-O(3)-Si(2)  | 124.1(2)   |
| C(19)-N(1)-N(2)   | 114.7(3)   |
| C(20)-N(2)-N(1)   | 119.2(2)   |
| O(5)-N(3)-O(4)    | 122.3(3)   |
| O(5)-N(3)-C(21)   | 119.0(3)   |
| O(4)-N(3)-C(21)   | 118.7(3)   |
| O(6)-N(4)-O(7)    | 123.1(3)   |
| O(6)-N(4)-C(23)   | 118.9(3)   |
| O(7)-N(4)-C(23)   | 118.1(3)   |
| O(2)-C(1)-C(4)    | 113.6(3)   |
| O(2)-C(1)-C(2)    | 109.8(2)   |
| C(4)-C(1)-C(2)    | 102.4(2)   |
| O(1)-C(2)-C(11)   | 110.4(3)   |
| O(1)-C(2)-C(1)    | 106.7(2)   |
| C(11)-C(2)-C(1)   | 114.1(3)   |
| O(1)-C(3)-C(4)    | 104.8(2)   |
| O(1)-C(3)-C(18)   | 108.0(2)   |
| C(4)-C(3)-C(18)   | 115.5(3)   |
| C(1)-C(4)-C(3)    | 101.2(2)   |
| C(8)-C(7)-C(10)   | 110.1(4)   |
| C(8)-C(7)-C(9)    | 109.5(4)   |
| C(10)-C(7)-C(9)   | 108.4(4)   |
| C(8)-C(7)-Si(1)   | 110.4(3)   |
| C(10)-C(7)-Si(1)  | 109.0(3)   |
| C(9)-C(7)-Si(1)   | 109.3(3)   |
| O(3)-C(11)-C(2)   | 109.7(3)   |
| C(17)-C(14)-C(16) | 106.4(4)   |



|                     |            |
|---------------------|------------|
| C(17)-C(14)-C(15)   | 107.5(5)   |
| C(16)-C(14)-C(15)   | 112.2(6)   |
| C(17)-C(14)-Si(2)   | 111.6(3)   |
| C(16)-C(14)-Si(2)   | 110.0(5)   |
| C(15)-C(14)-Si(2)   | 109.1(3)   |
| C(19)-C(18)-C(3)    | 110.5(3)   |
| N(1)-C(19)-C(18)    | 120.1(3)   |
| N(2)-C(20)-C(21)    | 123.5(3)   |
| N(2)-C(20)-C(25)    | 120.2(3)   |
| C(21)-C(20)-C(25)   | 116.3(3)   |
| C(22)-C(21)-C(20)   | 122.0(3)   |
| C(22)-C(21)-N(3)    | 116.2(3)   |
| C(20)-C(21)-N(3)    | 121.8(3)   |
| C(23)-C(22)-C(21)   | 119.0(3)   |
| C(22)-C(23)-C(24)   | 121.5(3)   |
| C(22)-C(23)-N(4)    | 118.7(3)   |
| C(24)-C(23)-N(4)    | 119.8(3)   |
| C(25)-C(24)-C(23)   | 119.6(3)   |
| C(24)-C(25)-C(20)   | 121.6(3)   |
| O(9)-Si(3)-C(30)    | 109.9(2)   |
| O(9)-Si(3)-C(31)    | 110.0(2)   |
| C(30)-Si(3)-C(31)   | 108.9(4)   |
| O(9)-Si(3)-C(32)    | 106.09(18) |
| C(30)-Si(3)-C(32)   | 110.8(3)   |
| C(31)-Si(3)-C(32)   | 111.2(3)   |
| O(10)-Si(4)-C(38A)  | 115.9(3)   |
| O(10)-Si(4)-C(37B)  | 121.2(4)   |
| O(10)-Si(4)-C(39)   | 106.57(16) |
| C(38A)-Si(4)-C(39)  | 121.1(3)   |
| C(37B)-Si(4)-C(39)  | 120.0(3)   |
| O(10)-Si(4)-C(37A)  | 101.1(3)   |
| C(38A)-Si(4)-C(37A) | 107.8(5)   |
| C(39)-Si(4)-C(37A)  | 101.7(4)   |
| O(10)-Si(4)-C(38B)  | 99.1(3)    |
| C(37B)-Si(4)-C(38B) | 103.5(6)   |
| C(39)-Si(4)-C(38B)  | 102.4(3)   |
| C(28)-O(8)-C(27)    | 105.9(3)   |
| C(26)-O(9)-Si(3)    | 123.4(2)   |
| C(36)-O(10)-Si(4)   | 121.7(2)   |
| C(44)-N(5)-N(6)     | 115.1(3)   |
| C(45)-N(6)-N(5)     | 118.8(2)   |
| O(12)-N(7)-O(11)    | 122.0(3)   |
| O(12)-N(7)-C(46)    | 119.1(3)   |
| O(11)-N(7)-C(46)    | 118.9(2)   |
| O(13)-N(8)-O(14)    | 123.9(3)   |
| O(13)-N(8)-C(48)    | 118.2(3)   |

|                     |          |
|---------------------|----------|
| O(14)-N(8)-C(48)    | 117.9(3) |
| O(9)-C(26)-C(27)    | 111.7(3) |
| O(9)-C(26)-C(29)    | 109.3(3) |
| C(27)-C(26)-C(29)   | 103.5(3) |
| O(8)-C(27)-C(36)    | 109.2(3) |
| O(8)-C(27)-C(26)    | 105.4(3) |
| C(36)-C(27)-C(26)   | 113.8(3) |
| O(8)-C(28)-C(43)    | 108.5(3) |
| O(8)-C(28)-C(29)    | 105.2(3) |
| C(43)-C(28)-C(29)   | 114.5(3) |
| C(26)-C(29)-C(28)   | 104.7(3) |
| C(33)-C(32)-C(35)   | 108.3(7) |
| C(33)-C(32)-C(34)   | 107.7(5) |
| C(35)-C(32)-C(34)   | 109.8(5) |
| C(33)-C(32)-Si(3)   | 110.4(5) |
| C(35)-C(32)-Si(3)   | 110.3(5) |
| C(34)-C(32)-Si(3)   | 110.2(4) |
| O(10)-C(36)-C(27)   | 109.2(3) |
| C(40B)-C(39)-C(42)  | 117.9(5) |
| C(41A)-C(39)-C(42)  | 122.8(5) |
| C(41A)-C(39)-C(40A) | 103.3(6) |
| C(42)-C(39)-C(40A)  | 96.1(5)  |
| C(40B)-C(39)-C(41B) | 104.5(6) |
| C(42)-C(39)-C(41B)  | 92.8(5)  |
| C(40B)-C(39)-Si(4)  | 122.1(4) |
| C(41A)-C(39)-Si(4)  | 116.2(4) |
| C(42)-C(39)-Si(4)   | 112.8(3) |
| C(40A)-C(39)-Si(4)  | 99.2(4)  |
| C(41B)-C(39)-Si(4)  | 99.0(4)  |
| C(44)-C(43)-C(28)   | 113.5(3) |
| N(5)-C(44)-C(43)    | 118.7(3) |
| N(6)-C(45)-C(50)    | 119.7(3) |
| N(6)-C(45)-C(46)    | 123.6(2) |
| C(50)-C(45)-C(46)   | 116.6(2) |
| C(47)-C(46)-C(45)   | 121.7(3) |
| C(47)-C(46)-N(7)    | 116.5(3) |
| C(45)-C(46)-N(7)    | 121.8(2) |
| C(48)-C(47)-C(46)   | 119.3(3) |
| C(47)-C(48)-C(49)   | 121.3(3) |
| C(47)-C(48)-N(8)    | 119.2(3) |
| C(49)-C(48)-N(8)    | 119.4(3) |
| C(50)-C(49)-C(48)   | 119.7(3) |
| C(49)-C(50)-C(45)   | 121.4(3) |

---

Table 4. Anisotropic displacement parameters ( $\text{\AA}^2 \times 10^3$ ) for **44**. The anisotropic displacement factor exponent takes the form:  $-2\pi^2 [ h^2 a^{*2} U^{11} + \dots + 2 h k a^* b^* U^{12} ]$

|       | $U^{11}$ | $U^{22}$ | $U^{33}$ | $U^{23}$ | $U^{13}$ | $U^{12}$ |
|-------|----------|----------|----------|----------|----------|----------|
| Si(1) | 31(1)    | 34(1)    | 26(1)    | 4(1)     | -2(1)    | -5(1)    |
| Si(2) | 30(1)    | 25(1)    | 36(1)    | 6(1)     | 7(1)     | 2(1)     |
| O(1)  | 28(1)    | 42(1)    | 27(1)    | -3(1)    | 2(1)     | -4(1)    |
| O(2)  | 39(1)    | 29(1)    | 29(1)    | 6(1)     | 0(1)     | 1(1)     |
| O(3)  | 30(1)    | 23(1)    | 50(2)    | -1(1)    | 3(1)     | -3(1)    |
| O(4)  | 25(1)    | 31(1)    | 38(1)    | 6(1)     | 3(1)     | 9(1)     |
| O(5)  | 49(2)    | 53(2)    | 53(2)    | 27(1)    | 21(1)    | 18(1)    |
| O(6)  | 62(2)    | 33(1)    | 28(1)    | -1(1)    | -10(1)   | 16(1)    |
| O(7)  | 35(1)    | 42(1)    | 49(2)    | -1(1)    | -11(1)   | 17(1)    |
| N(1)  | 23(1)    | 21(1)    | 24(1)    | -1(1)    | 1(1)     | -3(1)    |
| N(2)  | 21(1)    | 21(1)    | 25(1)    | 1(1)     | 1(1)     | 1(1)     |
| N(3)  | 30(1)    | 27(1)    | 33(1)    | 4(1)     | 5(1)     | 4(1)     |
| N(4)  | 38(2)    | 25(1)    | 31(1)    | -8(1)    | -16(1)   | 9(1)     |
| C(1)  | 30(2)    | 23(1)    | 27(1)    | 1(1)     | -1(1)    | 4(1)     |
| C(2)  | 28(1)    | 20(1)    | 28(1)    | 0(1)     | -2(1)    | 2(1)     |
| C(3)  | 30(2)    | 21(1)    | 26(1)    | 0(1)     | 0(1)     | 0(1)     |
| C(4)  | 29(1)    | 26(1)    | 26(1)    | 1(1)     | 1(1)     | -1(1)    |
| C(5)  | 59(3)    | 50(2)    | 42(2)    | -10(2)   | 8(2)     | -19(2)   |
| C(6)  | 37(2)    | 60(3)    | 37(2)    | 7(2)     | -1(2)    | 3(2)     |
| C(7)  | 45(2)    | 50(2)    | 33(2)    | 15(2)    | -3(2)    | 4(2)     |
| C(8)  | 67(3)    | 47(2)    | 77(3)    | 31(2)    | -11(3)   | -15(2)   |
| C(9)  | 52(3)    | 66(3)    | 63(3)    | 6(2)     | -16(2)   | 11(2)    |
| C(10) | 84(4)    | 94(4)    | 32(2)    | 26(2)    | 6(2)     | 21(3)    |
| C(11) | 26(2)    | 27(2)    | 39(2)    | 2(1)     | -6(1)    | 1(1)     |
| C(12) | 40(2)    | 31(2)    | 71(3)    | 11(2)    | 4(2)     | 7(2)     |
| C(13) | 76(3)    | 92(4)    | 44(2)    | 26(3)    | 23(2)    | 37(3)    |
| C(14) | 29(2)    | 35(2)    | 93(4)    | -20(2)   | -3(2)    | -5(1)    |
| C(15) | 64(3)    | 146(7)   | 68(4)    | -56(4)   | -8(3)    | -5(4)    |
| C(16) | 61(4)    | 25(2)    | 325(14)  | 9(4)     | -68(6)   | -8(2)    |
| C(17) | 35(2)    | 37(2)    | 72(3)    | -5(2)    | -10(2)   | -5(2)    |
| C(18) | 31(2)    | 24(1)    | 27(2)    | -1(1)    | -4(1)    | 0(1)     |
| C(19) | 27(1)    | 26(1)    | 25(1)    | -4(1)    | -1(1)    | 2(1)     |
| C(20) | 22(1)    | 16(1)    | 25(1)    | -5(1)    | -2(1)    | -1(1)    |
| C(21) | 25(1)    | 21(1)    | 25(1)    | -3(1)    | -3(1)    | 1(1)     |
| C(22) | 34(2)    | 22(1)    | 23(1)    | -3(1)    | -4(1)    | 3(1)     |
| C(23) | 30(2)    | 21(1)    | 27(1)    | -5(1)    | -12(1)   | 5(1)     |
| C(24) | 22(1)    | 26(1)    | 34(2)    | -6(1)    | -5(1)    | 5(1)     |
| C(25) | 22(1)    | 22(1)    | 30(2)    | -3(1)    | -1(1)    | 0(1)     |
| Si(3) | 55(1)    | 32(1)    | 29(1)    | 5(1)     | -9(1)    | -10(1)   |
| Si(4) | 49(1)    | 24(1)    | 33(1)    | 4(1)     | -17(1)   | 0(1)     |
| O(8)  | 52(1)    | 21(1)    | 30(1)    | 7(1)     | -11(1)   | -1(1)    |

|        |         |         |       |        |        |        |
|--------|---------|---------|-------|--------|--------|--------|
| O(9)   | 59(2)   | 35(1)   | 27(1) | 1(1)   | -8(1)  | -2(1)  |
| O(10)  | 77(2)   | 26(1)   | 31(1) | 7(1)   | -15(1) | 9(1)   |
| O(11)  | 26(1)   | 29(1)   | 42(1) | 6(1)   | 5(1)   | 9(1)   |
| O(12)  | 33(1)   | 42(1)   | 47(2) | 16(1)  | 16(1)  | 5(1)   |
| O(13)  | 47(2)   | 49(2)   | 40(1) | 20(1)  | -6(1)  | 10(1)  |
| O(14)  | 29(1)   | 30(1)   | 52(2) | 5(1)   | -10(1) | 10(1)  |
| N(5)   | 32(1)   | 19(1)   | 20(1) | 0(1)   | -3(1)  | 2(1)   |
| N(6)   | 20(1)   | 17(1)   | 26(1) | 1(1)   | 0(1)   | 3(1)   |
| N(7)   | 24(1)   | 23(1)   | 30(1) | 0(1)   | 0(1)   | 1(1)   |
| N(8)   | 30(1)   | 24(1)   | 35(1) | 3(1)   | -13(1) | 2(1)   |
| C(26)  | 57(2)   | 22(1)   | 27(2) | 4(1)   | -11(1) | -5(1)  |
| C(27)  | 57(2)   | 21(1)   | 27(2) | 9(1)   | -12(2) | -2(1)  |
| C(28)  | 58(2)   | 24(2)   | 27(2) | 2(1)   | -7(2)  | 0(1)   |
| C(29)  | 54(2)   | 28(2)   | 35(2) | 9(1)   | -14(2) | -9(2)  |
| C(30)  | 66(3)   | 136(6)  | 54(3) | 40(4)  | -3(2)  | 30(4)  |
| C(31)  | 208(8)  | 60(3)   | 37(2) | 16(2)  | -35(4) | -73(4) |
| C(32)  | 84(3)   | 67(3)   | 28(2) | -3(2)  | -19(2) | 21(3)  |
| C(33)  | 97(5)   | 255(13) | 49(3) | 35(5)  | 6(3)   | 87(7)  |
| C(34)  | 147(6)  | 74(4)   | 35(2) | -17(2) | -37(3) | 35(4)  |
| C(35)  | 256(12) | 34(3)   | 83(5) | -8(3)  | -59(6) | 4(4)   |
| C(36)  | 65(2)   | 28(2)   | 32(2) | 11(1)  | -7(2)  | 10(2)  |
| C(37A) | 29(4)   | 35(4)   | 88(7) | -13(4) | -7(4)  | -2(3)  |
| C(38A) | 58(6)   | 63(6)   | 32(4) | 11(4)  | 4(3)   | 28(4)  |
| C(37B) | 71(7)   | 36(5)   | 83(9) | 24(5)  | -50(7) | -19(5) |
| C(38B) | 70(7)   | 34(4)   | 28(4) | 7(3)   | 9(4)   | 5(4)   |
| C(39)  | 78(3)   | 26(2)   | 37(2) | 12(1)  | -23(2) | 4(2)   |
| C(40A) | 51(5)   | 73(6)   | 63(6) | 39(5)  | 23(4)  | 13(4)  |
| C(41A) | 37(4)   | 61(5)   | 36(4) | 12(3)  | -10(3) | 4(3)   |
| C(40B) | 86(7)   | 33(4)   | 23(4) | 6(3)   | -9(4)  | 10(4)  |
| C(41B) | 39(4)   | 33(4)   | 57(5) | -3(3)  | -21(4) | 3(3)   |
| C(42)  | 113(4)  | 36(2)   | 40(2) | 6(2)   | -11(2) | 23(2)  |
| C(43)  | 47(2)   | 34(2)   | 23(1) | 5(1)   | -1(1)  | 6(1)   |
| C(44)  | 35(2)   | 30(2)   | 23(1) | 1(1)   | -3(1)  | 5(1)   |
| C(45)  | 20(1)   | 16(1)   | 22(1) | -2(1)  | -4(1)  | -1(1)  |
| C(46)  | 19(1)   | 18(1)   | 25(1) | -3(1)  | -1(1)  | 1(1)   |
| C(47)  | 25(1)   | 18(1)   | 23(1) | 1(1)   | -3(1)  | -1(1)  |
| C(48)  | 24(1)   | 20(1)   | 26(1) | -2(1)  | -8(1)  | 0(1)   |
| C(49)  | 18(1)   | 22(1)   | 31(2) | -3(1)  | -4(1)  | 1(1)   |
| C(50)  | 23(1)   | 20(1)   | 24(1) | -2(1)  | 0(1)   | 0(1)   |

---

Table 5. Hydrogen coordinates ( $\times 10^4$ ) and isotropic displacement parameters ( $\text{\AA}^2 \times 10^3$ ) for **44**.

|        | x     | y     | z     | U(eq) |
|--------|-------|-------|-------|-------|
| H(2A)  | 1358  | 1502  | 12376 | 27    |
| H(1B)  | 1534  | 1711  | 9543  | 32    |
| H(2B)  | -1109 | 3864  | 9965  | 31    |
| H(3A)  | 2689  | 1541  | 10560 | 31    |
| H(4A)  | 2829  | 4420  | 9999  | 32    |
| H(4B)  | 4084  | 2922  | 9871  | 32    |
| H(5A)  | 1036  | 654   | 8612  | 75    |
| H(5B)  | 995   | 1267  | 7997  | 75    |
| H(5C)  | -756  | 1623  | 8393  | 75    |
| H(6A)  | 4925  | 3784  | 8746  | 67    |
| H(6B)  | 4838  | 2771  | 8226  | 67    |
| H(6C)  | 4642  | 2014  | 8818  | 67    |
| H(8A)  | 1530  | 7171  | 8083  | 96    |
| H(8B)  | 3343  | 6189  | 8280  | 96    |
| H(8C)  | 1598  | 6462  | 8686  | 96    |
| H(9A)  | -1443 | 6033  | 7901  | 91    |
| H(9B)  | -1559 | 5231  | 8488  | 91    |
| H(9C)  | -1666 | 4253  | 7960  | 91    |
| H(10A) | 1308  | 5399  | 7292  | 107   |
| H(10B) | 1216  | 3632  | 7424  | 107   |
| H(10C) | 3123  | 4486  | 7525  | 107   |
| H(11A) | -2865 | 1716  | 10226 | 37    |
| H(11B) | -2453 | 1798  | 9587  | 37    |
| H(12A) | 1069  | -2389 | 10473 | 72    |
| H(12B) | 471   | -3020 | 9905  | 72    |
| H(12C) | -439  | -3683 | 10454 | 72    |
| H(13A) | -1983 | -616  | 11132 | 109   |
| H(13B) | -3411 | -1943 | 11055 | 109   |
| H(13C) | -4002 | -257  | 10866 | 109   |
| H(15A) | -3781 | -2041 | 8867  | 137   |
| H(15B) | -1709 | -2314 | 9109  | 137   |
| H(15C) | -2607 | -645  | 9049  | 137   |
| H(16A) | -5649 | -3561 | 9679  | 205   |
| H(16B) | -4492 | -3605 | 10230 | 205   |
| H(16C) | -3499 | -4176 | 9687  | 205   |
| H(17A) | -6405 | -1152 | 9467  | 72    |
| H(17B) | -5135 | 201   | 9639  | 72    |
| H(17C) | -6041 | -884  | 10093 | 72    |
| H(18A) | 4455  | 3319  | 11022 | 33    |
| H(18B) | 2680  | 4485  | 11007 | 33    |
| H(19A) | 1053  | 2918  | 11653 | 31    |

|        |       |       |       |     |
|--------|-------|-------|-------|-----|
| H(22A) | 3090  | -2229 | 13635 | 31  |
| H(24A) | 7543  | -1743 | 12607 | 33  |
| H(25A) | 5907  | 133   | 12122 | 29  |
| H(6D)  | -3128 | 2638  | 13019 | 25  |
| H(26A) | -3399 | -2844 | 15546 | 43  |
| H(27A) | -791  | -835  | 15428 | 42  |
| H(28A) | -3794 | -1229 | 14284 | 44  |
| H(29A) | -6033 | -669  | 15223 | 47  |
| H(29B) | -5649 | -2250 | 14937 | 47  |
| H(30A) | -69   | -2417 | 16292 | 130 |
| H(30B) | -117  | -2090 | 16924 | 130 |
| H(30C) | 7     | -727  | 16488 | 130 |
| H(31A) | -3494 | -4150 | 16464 | 151 |
| H(31B) | -5442 | -3361 | 16655 | 151 |
| H(31C) | -3794 | -3715 | 17081 | 151 |
| H(33A) | -6602 | 808   | 17251 | 205 |
| H(33B) | -6687 | -950  | 17145 | 205 |
| H(33C) | -6553 | 230   | 16646 | 205 |
| H(34A) | -4090 | 37    | 17872 | 128 |
| H(34B) | -2075 | -564  | 17655 | 128 |
| H(34C) | -3814 | -1664 | 17690 | 128 |
| H(35A) | -3710 | 2135  | 17149 | 186 |
| H(35B) | -3605 | 1720  | 16526 | 186 |
| H(35C) | -1836 | 1341  | 16909 | 186 |
| H(36A) | -1587 | -2920 | 14605 | 51  |
| H(36B) | 357   | -2056 | 14633 | 51  |
| H(37A) | -2796 | -5802 | 15491 | 76  |
| H(37B) | -2342 | -7089 | 15068 | 76  |
| H(37C) | -3095 | -5461 | 14859 | 76  |
| H(38A) | 134   | -5237 | 14130 | 78  |
| H(38B) | 1221  | -6755 | 14331 | 78  |
| H(38C) | 2283  | -5198 | 14320 | 78  |
| H(37D) | -2664 | -6259 | 14893 | 95  |
| H(37E) | -1059 | -7280 | 14610 | 95  |
| H(37F) | -1693 | -5686 | 14341 | 95  |
| H(38D) | 3561  | -4901 | 14722 | 67  |
| H(38E) | 2102  | -4388 | 14258 | 67  |
| H(38F) | 2654  | -6131 | 14357 | 67  |
| H(40A) | -120  | -6985 | 16404 | 95  |
| H(40B) | -1414 | -7198 | 15889 | 95  |
| H(40C) | -1113 | -5551 | 16105 | 95  |
| H(41A) | 3020  | -6071 | 16291 | 67  |
| H(41B) | 2087  | -4540 | 16044 | 67  |
| H(41C) | 3859  | -5326 | 15746 | 67  |
| H(40D) | 2106  | -6404 | 16407 | 71  |
| H(40E) | -114  | -6186 | 16304 | 71  |

|        |       |       |       |    |
|--------|-------|-------|-------|----|
| H(40F) | 1253  | -4817 | 16186 | 71 |
| H(41D) | 4594  | -6598 | 15728 | 64 |
| H(41E) | 3970  | -4919 | 15540 | 64 |
| H(41F) | 4046  | -6226 | 15112 | 64 |
| H(42A) | 2503  | -8468 | 15841 | 96 |
| H(42B) | 2380  | -8155 | 15203 | 96 |
| H(42C) | 508   | -8498 | 15547 | 96 |
| H(43A) | -6414 | 577   | 14268 | 42 |
| H(43B) | -5223 | 1616  | 14641 | 42 |
| H(44A) | -2895 | 1433  | 13809 | 35 |
| H(47A) | -4768 | 6249  | 11699 | 27 |
| H(49A) | -9311 | 5834  | 12698 | 28 |
| H(50A) | -7715 | 3987  | 13210 | 26 |

Table 6. Hydrogen bonds for **44** [ $\text{\AA}$  and  $^\circ$ ].

| D-H...A                | d(D-H) | d(H...A) | d(D...A) | $\angle(\text{DHA})$ |
|------------------------|--------|----------|----------|----------------------|
| N(2)-H(2A)...O(4)      | 0.88   | 1.97     | 2.608(3) | 127.8                |
| N(2)-H(2A)...O(11)     | 0.88   | 2.57     | 3.397(3) | 155.9                |
| C(19)-H(19A)...O(11)   | 0.95   | 2.61     | 3.479(4) | 152.8                |
| C(24)-H(24A)...O(14)#1 | 0.95   | 2.44     | 3.351(4) | 159.7                |
| N(6)-H(6D)...O(4)      | 0.88   | 2.62     | 3.447(3) | 156.3                |
| N(6)-H(6D)...O(11)     | 0.88   | 1.99     | 2.611(3) | 126.9                |
| C(28)-H(28A)...O(6)#2  | 1.00   | 2.63     | 3.527(4) | 149.5                |
| C(49)-H(49A)...O(7)#3  | 0.95   | 2.39     | 3.287(4) | 157.1                |

Symmetry transformations used to generate equivalent atoms:

#1  $x+2, y-1, z$  #2  $x-1, y, z$  #3  $x-2, y+1, z$

## Chemical Correlation:

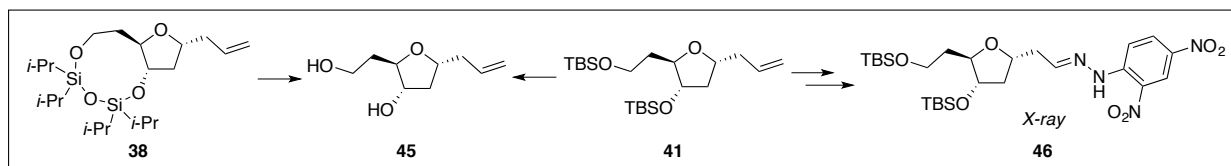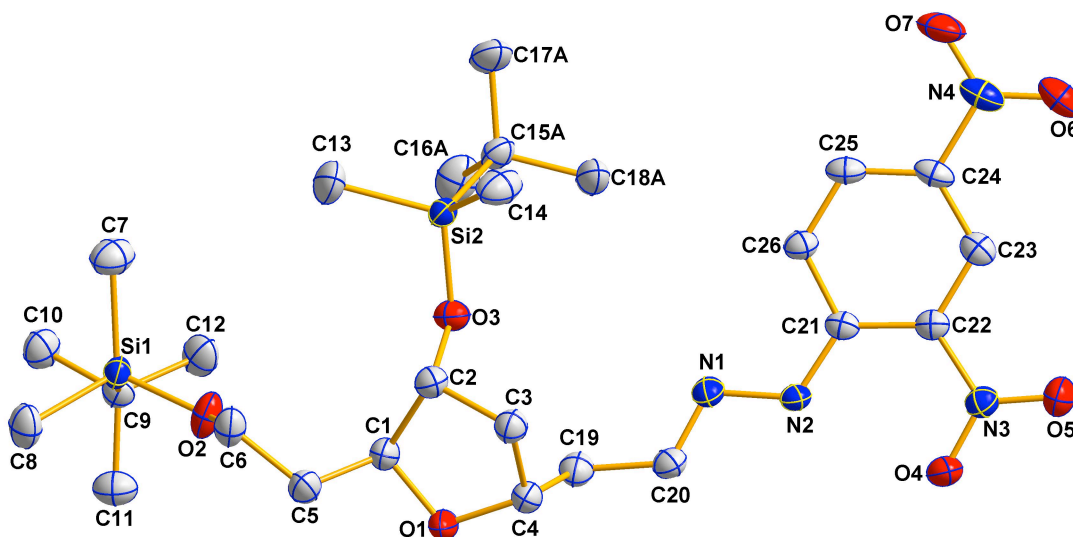X-ray crystallographic data for **46**.

A yellow block-like crystal with the size of  $0.24 \times 0.32 \times 0.52 \text{ mm}^3$  was selected for geometry and intensity data collection with a Bruker SMART APEXII CCD area detector on a D8 goniometer at 100 K. The temperature during the data collection was controlled with an Oxford Cryosystems Series 700+ instrument. Preliminary lattice parameters and orientation matrices were obtained from three sets of frames. Data were collected using graphite-monochromated and 0.5 mm-MonoCap-collimated Mo-K $\alpha$  radiation ( $\lambda = 0.71073 \text{ \AA}$ ) with the  $\omega$  and  $\phi$  scan method [1]. Data were processed with the INTEGRATE program of the APEX2 software [1] for reduction and cell refinement. Multi-scan absorption corrections were applied by using the SCALE program for the area detector. The structure was solved by the direct method and refined on  $F^2$  (SHELXTL) [2]. Non-hydrogen atoms were refined with anisotropic displacement parameters, and hydrogen atoms were placed in idealized positions (C-H = 0.95-1.00 and N-H = 0.88  $\text{\AA}$ ) and included as riding with  $U_{\text{iso}}(\text{H}) = 1.2$  or  $1.5 U_{\text{eq}}(\text{non-H})$ .

[1] APEX2 (version 2012.4). *Program for Bruker CCD X-ray Diffractometer Control*, Bruker AXS Inc., Madison, WI, 2012.

[2] G. M. Sheldrick, SHELXTL, version 6.14. *Program for solution and refinement of crystal structures*, Universität Göttingen, Germany, 2009.

Table 7. Crystal data and structure refinement for **46**.

|                     |                                                             |
|---------------------|-------------------------------------------------------------|
| Identification code | 12kaw11h                                                    |
| Empirical formula   | $\text{C}_{26}\text{H}_{46}\text{N}_4\text{O}_7\text{Si}_2$ |
| Formula weight      | 582.85                                                      |
| Temperature         | 100(2) K                                                    |



|                                   |                                                                                                                                     |
|-----------------------------------|-------------------------------------------------------------------------------------------------------------------------------------|
| Wavelength                        | 0.71073 Å                                                                                                                           |
| Crystal system, space group       | Monoclinic, $P2_1/c$                                                                                                                |
| Unit cell dimensions              | $a = 24.0157(13)$ Å $\alpha = 90^\circ$<br>$b = 8.1309(4)$ Å $\beta = 100.0940(10)^\circ$<br>$c = 16.5638(9)$ Å $\gamma = 90^\circ$ |
| Volume                            | $3184.3(3)$ Å <sup>3</sup>                                                                                                          |
| Z, Calculated density             | 4, 1.216 Mg/m <sup>3</sup>                                                                                                          |
| Absorption coefficient            | $0.157$ mm <sup>-1</sup>                                                                                                            |
| F(000)                            | 1256                                                                                                                                |
| Crystal size                      | $0.52 \times 0.32 \times 0.24$ mm <sup>3</sup>                                                                                      |
| Theta range for data collection   | $1.72$ to $28.29^\circ$                                                                                                             |
| Limiting indices                  | $-31 \leq h \leq 31, -10 \leq k \leq 10, -22 \leq l \leq 21$                                                                        |
| Reflections collected / unique    | 64142 / 7864 [R(int) = 0.0295]                                                                                                      |
| Completeness to theta = 28.29     | 99.6 %                                                                                                                              |
| Absorption correction             | Semi-empirical from equivalents                                                                                                     |
| Max. and min. transmission        | 0.9632 and 0.9226                                                                                                                   |
| Refinement method                 | Full-matrix least-squares on F <sup>2</sup>                                                                                         |
| Data / restraints / parameters    | 7864 / 40 / 406                                                                                                                     |
| Goodness-of-fit on F <sup>2</sup> | 1.067                                                                                                                               |
| Final R indices [I > 2sigma(I)]   | R1 = 0.0436, wR2 = 0.1115                                                                                                           |
| R indices (all data)              | R1 = 0.0511, wR2 = 0.1167                                                                                                           |
| Largest diff. peak and hole       | 0.423 and -0.243 e.Å <sup>-3</sup>                                                                                                  |

Table 8. Atomic coordinates ( $\times 10^4$ ) and equivalent isotropic displacement parameters ( $\text{Å}^2 \times 10^3$ ) for **46**. U(eq) is defined as one third of the trace of the orthogonalized  $U^{ij}$  tensor.

|        | x       | y        | z       | U(eq) |
|--------|---------|----------|---------|-------|
| Si(1)  | 4105(1) | 12980(1) | 3894(1) | 26(1) |
| Si(2)  | 2598(1) | 9399(1)  | 5741(1) | 25(1) |
| Si(2') | 2892(3) | 8990(10) | 5457(5) | 25(1) |
| O(1)   | 1857(1) | 10352(2) | 2822(1) | 37(1) |
| O(2)   | 3437(1) | 12439(2) | 3630(1) | 38(1) |
| O(3)   | 2372(1) | 9381(1)  | 4735(1) | 30(1) |
| O(4)   | -307(1) | 3264(2)  | 3400(1) | 34(1) |
| O(5)   | -714(1) | 1657(2)  | 4160(1) | 41(1) |
| O(6)   | 65(1)   | 455(2)   | 6901(1) | 44(1) |
| O(7)   | 828(1)  | 1697(2)  | 7494(1) | 50(1) |
| N(1)   | 1106(1) | 5768(2)  | 3996(1) | 28(1) |
| N(2)   | 626(1)  | 4820(2)  | 4009(1) | 24(1) |
| N(3)   | -325(1) | 2567(2)  | 4060(1) | 28(1) |
| N(4)   | 462(1)  | 1416(2)  | 6893(1) | 36(1) |
| C(1)   | 2298(1) | 10929(2) | 3471(1) | 29(1) |
| C(2)   | 2076(1) | 10703(2) | 4285(1) | 28(1) |
| C(3)   | 1449(1) | 10297(2) | 4003(1) | 30(1) |
| C(4)   | 1437(1) | 9482(2)  | 3170(1) | 30(1) |

|        |          |           |          |       |
|--------|----------|-----------|----------|-------|
| C(5)   | 2429(1)  | 12691(2)  | 3270(1)  | 34(1) |
| C(6)   | 2963(1)  | 13359(2)  | 3781(1)  | 34(1) |
| C(7)   | 4339(1)  | 12918(3)  | 5024(1)  | 45(1) |
| C(8)   | 4204(1)  | 15107(2)  | 3526(1)  | 40(1) |
| C(9)   | 4504(1)  | 11428(2)  | 3374(1)  | 29(1) |
| C(10)  | 5143(1)  | 11695(2)  | 3624(1)  | 38(1) |
| C(11)  | 4340(1)  | 11594(2)  | 2438(1)  | 41(1) |
| C(12)  | 4356(1)  | 9684(2)   | 3622(1)  | 40(1) |
| C(13)  | 3169(1)  | 10946(3)  | 6015(2)  | 51(1) |
| C(14)  | 2011(1)  | 9932(3)   | 6284(1)  | 46(1) |
| C(15A) | 2833(2)  | 7233(4)   | 6043(2)  | 30(1) |
| C(16A) | 3286(2)  | 6700(5)   | 5552(3)  | 48(1) |
| C(17A) | 3073(2)  | 7106(6)   | 6963(3)  | 45(1) |
| C(18A) | 2326(2)  | 6055(6)   | 5846(3)  | 39(1) |
| C(15B) | 2943(4)  | 7295(9)   | 5850(5)  | 30(1) |
| C(16B) | 3356(4)  | 7093(12)  | 5253(6)  | 48(1) |
| C(17B) | 3259(4)  | 7155(13)  | 6738(5)  | 45(1) |
| C(18B) | 2476(4)  | 5965(16)  | 5712(8)  | 39(1) |
| C(13') | 3110(20) | 10870(30) | 6060(30) | 51(1) |
| C(14') | 3535(10) | 7990(40)  | 5220(20) | 46(1) |
| C(15') | 2575(8)  | 7550(30)  | 6143(12) | 30(1) |
| C(16') | 1964(10) | 8100(50)  | 6150(20) | 48(1) |
| C(17') | 2937(17) | 7490(60)  | 7000(20) | 45(1) |
| C(18') | 2609(15) | 5970(40)  | 5650(20) | 39(1) |
| C(19)  | 1576(1)  | 7645(2)   | 3213(1)  | 32(1) |
| C(20)  | 1082(1)  | 6637(2)   | 3348(1)  | 30(1) |
| C(21)  | 583(1)   | 3950(2)   | 4686(1)  | 22(1) |
| C(22)  | 132(1)   | 2852(2)   | 4739(1)  | 23(1) |
| C(23)  | 96(1)    | 2018(2)   | 5461(1)  | 27(1) |
| C(24)  | 507(1)   | 2271(2)   | 6135(1)  | 28(1) |
| C(25)  | 961(1)   | 3327(2)   | 6119(1)  | 29(1) |
| C(26)  | 998(1)   | 4150(2)   | 5408(1)  | 27(1) |

Table 9. Bond lengths [Å] and angles [°] for **46**.

|              |            |
|--------------|------------|
| Si(1)-O(2)   | 1.6479(12) |
| Si(1)-C(7)   | 1.8591(19) |
| Si(1)-C(8)   | 1.8621(18) |
| Si(1)-C(9)   | 1.8808(17) |
| Si(2)-O(3)   | 1.6600(11) |
| Si(2)-C(14)  | 1.852(2)   |
| Si(2)-C(13)  | 1.858(2)   |
| Si(2)-C(15A) | 1.890(3)   |
| Si(2)-C(15B) | 1.895(7)   |
| Si(2')-O(3)  | 1.603(6)   |

|               |            |
|---------------|------------|
| Si(2')-C(14') | 1.849(10)  |
| Si(2')-C(13') | 1.853(10)  |
| Si(2')-C(15') | 1.884(9)   |
| O(1)-C(4)     | 1.4343(18) |
| O(1)-C(1)     | 1.4485(18) |
| O(2)-C(6)     | 1.420(2)   |
| O(3)-C(2)     | 1.4251(19) |
| O(4)-N(3)     | 1.2388(17) |
| O(5)-N(3)     | 1.2260(18) |
| O(6)-N(4)     | 1.234(2)   |
| O(7)-N(4)     | 1.229(2)   |
| N(1)-C(20)    | 1.278(2)   |
| N(1)-N(2)     | 1.3902(17) |
| N(2)-C(21)    | 1.3447(18) |
| N(2)-H(2N)    | 0.8800     |
| N(3)-C(22)    | 1.4459(18) |
| N(4)-C(24)    | 1.4544(19) |
| C(1)-C(5)     | 1.516(2)   |
| C(1)-C(2)     | 1.546(2)   |
| C(1)-H(1)     | 1.0000     |
| C(2)-C(3)     | 1.531(2)   |
| C(2)-H(2)     | 1.0000     |
| C(3)-C(4)     | 1.527(2)   |
| C(3)-H(3A)    | 0.9900     |
| C(3)-H(3B)    | 0.9900     |
| C(4)-C(19)    | 1.530(2)   |
| C(4)-H(4)     | 1.0000     |
| C(5)-C(6)     | 1.509(2)   |
| C(5)-H(5A)    | 0.9900     |
| C(5)-H(5B)    | 0.9900     |
| C(6)-H(6A)    | 0.9900     |
| C(6)-H(6B)    | 0.9900     |
| C(7)-H(7A)    | 0.9800     |
| C(7)-H(7B)    | 0.9800     |
| C(7)-H(7C)    | 0.9800     |
| C(8)-H(8A)    | 0.9800     |
| C(8)-H(8B)    | 0.9800     |
| C(8)-H(8C)    | 0.9800     |
| C(9)-C(10)    | 1.534(2)   |
| C(9)-C(12)    | 1.535(2)   |
| C(9)-C(11)    | 1.537(2)   |
| C(10)-H(10A)  | 0.9800     |
| C(10)-H(10B)  | 0.9800     |
| C(10)-H(10C)  | 0.9800     |
| C(11)-H(11A)  | 0.9800     |
| C(11)-H(11B)  | 0.9800     |

|               |           |
|---------------|-----------|
| C(11)-H(11C)  | 0.9800    |
| C(12)-H(12A)  | 0.9800    |
| C(12)-H(12B)  | 0.9800    |
| C(12)-H(12C)  | 0.9800    |
| C(13)-H(13A)  | 0.9800    |
| C(13)-H(13B)  | 0.9800    |
| C(13)-H(13C)  | 0.9800    |
| C(14)-H(14A)  | 0.9800    |
| C(14)-H(14B)  | 0.9800    |
| C(14)-H(14C)  | 0.9800    |
| C(15A)-C(16A) | 1.530(4)  |
| C(15A)-C(17A) | 1.535(4)  |
| C(15A)-C(18A) | 1.540(4)  |
| C(16A)-H(16A) | 0.9800    |
| C(16A)-H(16B) | 0.9800    |
| C(16A)-H(16C) | 0.9800    |
| C(17A)-H(17A) | 0.9800    |
| C(17A)-H(17B) | 0.9800    |
| C(17A)-H(17C) | 0.9800    |
| C(18A)-H(18A) | 0.9800    |
| C(18A)-H(18B) | 0.9800    |
| C(18A)-H(18C) | 0.9800    |
| C(15B)-C(16B) | 1.528(8)  |
| C(15B)-C(17B) | 1.536(8)  |
| C(15B)-C(18B) | 1.546(8)  |
| C(16B)-H(16D) | 0.9800    |
| C(16B)-H(16E) | 0.9800    |
| C(16B)-H(16F) | 0.9800    |
| C(17B)-H(17D) | 0.9800    |
| C(17B)-H(17E) | 0.9800    |
| C(17B)-H(17F) | 0.9800    |
| C(18B)-H(18D) | 0.9800    |
| C(18B)-H(18E) | 0.9800    |
| C(18B)-H(18F) | 0.9800    |
| C(13')-H(13D) | 0.9800    |
| C(13')-H(13E) | 0.9800    |
| C(13')-H(13F) | 0.9800    |
| C(14')-H(14D) | 0.9800    |
| C(14')-H(14E) | 0.9800    |
| C(14')-H(14F) | 0.9800    |
| C(15')-C(18') | 1.529(10) |
| C(15')-C(17') | 1.535(10) |
| C(15')-C(16') | 1.538(10) |
| C(16')-H(16G) | 0.9800    |
| C(16')-H(16H) | 0.9800    |
| C(16')-H(16I) | 0.9800    |

|                      |            |
|----------------------|------------|
| C(17')-H(17G)        | 0.9800     |
| C(17')-H(17H)        | 0.9800     |
| C(17')-H(17I)        | 0.9800     |
| C(18')-H(18G)        | 0.9800     |
| C(18')-H(18H)        | 0.9800     |
| C(18')-H(18I)        | 0.9800     |
| C(19)-C(20)          | 1.490(2)   |
| C(19)-H(19A)         | 0.9900     |
| C(19)-H(19B)         | 0.9900     |
| C(20)-H(20)          | 0.9500     |
| C(21)-C(22)          | 1.418(2)   |
| C(21)-C(26)          | 1.425(2)   |
| C(22)-C(23)          | 1.392(2)   |
| C(23)-C(24)          | 1.370(2)   |
| C(23)-H(23)          | 0.9500     |
| C(24)-C(25)          | 1.392(2)   |
| C(25)-C(26)          | 1.372(2)   |
| C(25)-H(25)          | 0.9500     |
| C(26)-H(26)          | 0.9500     |
| O(2)-Si(1)-C(7)      | 111.59(8)  |
| O(2)-Si(1)-C(8)      | 109.59(8)  |
| C(7)-Si(1)-C(8)      | 108.73(10) |
| O(2)-Si(1)-C(9)      | 104.48(7)  |
| C(7)-Si(1)-C(9)      | 110.76(8)  |
| C(8)-Si(1)-C(9)      | 111.67(8)  |
| O(3)-Si(2)-C(14)     | 110.25(8)  |
| O(3)-Si(2)-C(13)     | 110.45(11) |
| C(14)-Si(2)-C(13)    | 108.36(12) |
| O(3)-Si(2)-C(15A)    | 106.73(12) |
| C(14)-Si(2)-C(15A)   | 107.88(15) |
| C(13)-Si(2)-C(15A)   | 113.13(16) |
| O(3)-Si(2)-C(15B)    | 98.6(3)    |
| C(14)-Si(2)-C(15B)   | 121.5(3)   |
| C(13)-Si(2)-C(15B)   | 107.2(3)   |
| O(3)-Si(2')-C(14')   | 119.9(13)  |
| O(3)-Si(2')-C(13')   | 110.4(18)  |
| C(14')-Si(2')-C(13') | 108.3(8)   |
| O(3)-Si(2')-C(15')   | 103.3(8)   |
| C(14')-Si(2')-C(15') | 107.2(7)   |
| C(13')-Si(2')-C(15') | 106.9(8)   |
| C(4)-O(1)-C(1)       | 109.57(11) |
| C(6)-O(2)-Si(1)      | 125.88(11) |
| C(2)-O(3)-Si(2')     | 142.4(3)   |
| C(2)-O(3)-Si(2)      | 124.35(10) |
| C(20)-N(1)-N(2)      | 113.87(13) |

|                  |            |
|------------------|------------|
| C(21)-N(2)-N(1)  | 119.32(12) |
| C(21)-N(2)-H(2N) | 120.3      |
| N(1)-N(2)-H(2N)  | 120.3      |
| O(5)-N(3)-O(4)   | 122.73(13) |
| O(5)-N(3)-C(22)  | 118.99(13) |
| O(4)-N(3)-C(22)  | 118.28(13) |
| O(7)-N(4)-O(6)   | 123.49(14) |
| O(7)-N(4)-C(24)  | 117.42(15) |
| O(6)-N(4)-C(24)  | 119.09(15) |
| O(1)-C(1)-C(5)   | 107.21(13) |
| O(1)-C(1)-C(2)   | 106.88(12) |
| C(5)-C(1)-C(2)   | 114.91(14) |
| O(1)-C(1)-H(1)   | 109.2      |
| C(5)-C(1)-H(1)   | 109.2      |
| C(2)-C(1)-H(1)   | 109.2      |
| O(3)-C(2)-C(3)   | 111.78(13) |
| O(3)-C(2)-C(1)   | 109.21(13) |
| C(3)-C(2)-C(1)   | 103.35(12) |
| O(3)-C(2)-H(2)   | 110.8      |
| C(3)-C(2)-H(2)   | 110.8      |
| C(1)-C(2)-H(2)   | 110.8      |
| C(4)-C(3)-C(2)   | 103.38(12) |
| C(4)-C(3)-H(3A)  | 111.1      |
| C(2)-C(3)-H(3A)  | 111.1      |
| C(4)-C(3)-H(3B)  | 111.1      |
| C(2)-C(3)-H(3B)  | 111.1      |
| H(3A)-C(3)-H(3B) | 109.1      |
| O(1)-C(4)-C(3)   | 104.27(12) |
| O(1)-C(4)-C(19)  | 109.68(13) |
| C(3)-C(4)-C(19)  | 114.34(13) |
| O(1)-C(4)-H(4)   | 109.5      |
| C(3)-C(4)-H(4)   | 109.5      |
| C(19)-C(4)-H(4)  | 109.5      |
| C(6)-C(5)-C(1)   | 113.92(13) |
| C(6)-C(5)-H(5A)  | 108.8      |
| C(1)-C(5)-H(5A)  | 108.8      |
| C(6)-C(5)-H(5B)  | 108.8      |
| C(1)-C(5)-H(5B)  | 108.8      |
| H(5A)-C(5)-H(5B) | 107.7      |
| O(2)-C(6)-C(5)   | 109.87(14) |
| O(2)-C(6)-H(6A)  | 109.7      |
| C(5)-C(6)-H(6A)  | 109.7      |
| O(2)-C(6)-H(6B)  | 109.7      |
| C(5)-C(6)-H(6B)  | 109.7      |
| H(6A)-C(6)-H(6B) | 108.2      |
| Si(1)-C(7)-H(7A) | 109.5      |

|                      |            |
|----------------------|------------|
| Si(1)-C(7)-H(7B)     | 109.5      |
| H(7A)-C(7)-H(7B)     | 109.5      |
| Si(1)-C(7)-H(7C)     | 109.5      |
| H(7A)-C(7)-H(7C)     | 109.5      |
| H(7B)-C(7)-H(7C)     | 109.5      |
| Si(1)-C(8)-H(8A)     | 109.5      |
| Si(1)-C(8)-H(8B)     | 109.5      |
| H(8A)-C(8)-H(8B)     | 109.5      |
| Si(1)-C(8)-H(8C)     | 109.5      |
| H(8A)-C(8)-H(8C)     | 109.5      |
| H(8B)-C(8)-H(8C)     | 109.5      |
| C(10)-C(9)-C(12)     | 109.00(14) |
| C(10)-C(9)-C(11)     | 109.07(14) |
| C(12)-C(9)-C(11)     | 108.68(14) |
| C(10)-C(9)-Si(1)     | 110.32(11) |
| C(12)-C(9)-Si(1)     | 109.73(12) |
| C(11)-C(9)-Si(1)     | 110.00(11) |
| C(9)-C(10)-H(10A)    | 109.5      |
| C(9)-C(10)-H(10B)    | 109.5      |
| H(10A)-C(10)-H(10B)  | 109.5      |
| C(9)-C(10)-H(10C)    | 109.5      |
| H(10A)-C(10)-H(10C)  | 109.5      |
| H(10B)-C(10)-H(10C)  | 109.5      |
| C(9)-C(11)-H(11A)    | 109.5      |
| C(9)-C(11)-H(11B)    | 109.5      |
| H(11A)-C(11)-H(11B)  | 109.5      |
| C(9)-C(11)-H(11C)    | 109.5      |
| H(11A)-C(11)-H(11C)  | 109.5      |
| H(11B)-C(11)-H(11C)  | 109.5      |
| C(9)-C(12)-H(12A)    | 109.5      |
| C(9)-C(12)-H(12B)    | 109.5      |
| H(12A)-C(12)-H(12B)  | 109.5      |
| C(9)-C(12)-H(12C)    | 109.5      |
| H(12A)-C(12)-H(12C)  | 109.5      |
| H(12B)-C(12)-H(12C)  | 109.5      |
| C(16A)-C(15A)-C(17A) | 109.4(3)   |
| C(16A)-C(15A)-C(18A) | 108.7(3)   |
| C(17A)-C(15A)-C(18A) | 108.3(3)   |
| C(16A)-C(15A)-Si(2)  | 109.3(2)   |
| C(17A)-C(15A)-Si(2)  | 111.6(3)   |
| C(18A)-C(15A)-Si(2)  | 109.6(3)   |
| C(16B)-C(15B)-C(17B) | 110.2(7)   |
| C(16B)-C(15B)-C(18B) | 111.4(7)   |
| C(17B)-C(15B)-C(18B) | 108.3(8)   |
| C(16B)-C(15B)-Si(2)  | 110.9(5)   |
| C(17B)-C(15B)-Si(2)  | 107.0(6)   |

|                      |            |
|----------------------|------------|
| C(18B)-C(15B)-Si(2)  | 108.9(7)   |
| Si(2')-C(13')-H(13D) | 109.5      |
| Si(2')-C(13')-H(13E) | 109.5      |
| H(13D)-C(13')-H(13E) | 109.5      |
| Si(2')-C(13')-H(13F) | 109.5      |
| H(13D)-C(13')-H(13F) | 109.5      |
| H(13E)-C(13')-H(13F) | 109.5      |
| Si(2')-C(14')-H(14D) | 109.5      |
| Si(2')-C(14')-H(14E) | 109.5      |
| H(14D)-C(14')-H(14E) | 109.5      |
| Si(2')-C(14')-H(14F) | 109.5      |
| H(14D)-C(14')-H(14F) | 109.5      |
| H(14E)-C(14')-H(14F) | 109.5      |
| C(18')-C(15')-C(17') | 113.4(10)  |
| C(18')-C(15')-C(16') | 113.0(10)  |
| C(17')-C(15')-C(16') | 112.7(10)  |
| C(18')-C(15')-Si(2') | 97.8(19)   |
| C(17')-C(15')-Si(2') | 111(2)     |
| C(16')-C(15')-Si(2') | 108(2)     |
| C(15')-C(16')-H(16G) | 109.5      |
| C(15')-C(16')-H(16H) | 109.5      |
| H(16G)-C(16')-H(16H) | 109.5      |
| C(15')-C(16')-H(16I) | 109.5      |
| H(16G)-C(16')-H(16I) | 109.5      |
| H(16H)-C(16')-H(16I) | 109.5      |
| C(15')-C(17')-H(17G) | 109.5      |
| C(15')-C(17')-H(17H) | 109.5      |
| H(17G)-C(17')-H(17H) | 109.5      |
| C(15')-C(17')-H(17I) | 109.5      |
| H(17G)-C(17')-H(17I) | 109.5      |
| H(17H)-C(17')-H(17I) | 109.5      |
| C(15')-C(18')-H(18G) | 109.5      |
| C(15')-C(18')-H(18H) | 109.5      |
| H(18G)-C(18')-H(18H) | 109.5      |
| C(15')-C(18')-H(18I) | 109.5      |
| H(18G)-C(18')-H(18I) | 109.5      |
| H(18H)-C(18')-H(18I) | 109.5      |
| C(20)-C(19)-C(4)     | 111.80(14) |
| C(20)-C(19)-H(19A)   | 109.3      |
| C(4)-C(19)-H(19A)    | 109.3      |
| C(20)-C(19)-H(19B)   | 109.3      |
| C(4)-C(19)-H(19B)    | 109.3      |
| H(19A)-C(19)-H(19B)  | 107.9      |
| N(1)-C(20)-C(19)     | 120.70(14) |
| N(1)-C(20)-H(20)     | 119.7      |
| C(19)-C(20)-H(20)    | 119.7      |



|                   |            |
|-------------------|------------|
| N(2)-C(21)-C(22)  | 123.58(13) |
| N(2)-C(21)-C(26)  | 119.64(13) |
| C(22)-C(21)-C(26) | 116.76(13) |
| C(23)-C(22)-C(21) | 121.57(13) |
| C(23)-C(22)-N(3)  | 115.91(13) |
| C(21)-C(22)-N(3)  | 122.50(13) |
| C(24)-C(23)-C(22) | 118.88(15) |
| C(24)-C(23)-H(23) | 120.6      |
| C(22)-C(23)-H(23) | 120.6      |
| C(23)-C(24)-C(25) | 122.9(14)  |
| C(23)-C(24)-N(4)  | 118.68(15) |
| C(25)-C(24)-N(4)  | 119.23(14) |
| C(26)-C(25)-C(24) | 119.20(14) |
| C(26)-C(25)-H(25) | 120.4      |
| C(24)-C(25)-H(25) | 120.4      |
| C(25)-C(26)-C(21) | 121.51(14) |
| C(25)-C(26)-H(26) | 119.2      |
| C(21)-C(26)-H(26) | 119.2      |

Symmetry transformations used to generate equivalent atoms:

Table 10. Anisotropic displacement parameters ( $\text{\AA}^2 \times 10^3$ ) for **46**. The anisotropic displacement factor exponent takes the form:  $-2 \pi^2 [ h^2 a^{*2} U^{11} + \dots + 2 h k a^* b^* U^{12} ]$

|        | $U^{11}$ | $U^{22}$ | $U^{33}$ | $U^{23}$ | $U^{13}$ | $U^{12}$ |
|--------|----------|----------|----------|----------|----------|----------|
| Si(1)  | 23(1)    | 24(1)    | 30(1)    | 0(1)     | 2(1)     | -5(1)    |
| Si(2)  | 23(1)    | 26(1)    | 25(1)    | 0(1)     | -1(1)    | -3(1)    |
| Si(2') | 23(1)    | 26(1)    | 25(1)    | 0(1)     | -1(1)    | -3(1)    |
| O(1)   | 35(1)    | 51(1)    | 24(1)    | 4(1)     | 2(1)     | -19(1)   |
| O(2)   | 23(1)    | 31(1)    | 57(1)    | -8(1)    | 2(1)     | -4(1)    |
| O(3)   | 35(1)    | 30(1)    | 24(1)    | 0(1)     | 2(1)     | 2(1)     |
| O(4)   | 37(1)    | 38(1)    | 24(1)    | 1(1)     | -2(1)    | -4(1)    |
| O(5)   | 34(1)    | 47(1)    | 41(1)    | 0(1)     | 3(1)     | -13(1)   |
| O(6)   | 56(1)    | 43(1)    | 38(1)    | 12(1)    | 22(1)    | 4(1)     |
| O(7)   | 73(1)    | 52(1)    | 22(1)    | 9(1)     | 4(1)     | 1(1)     |
| N(1)   | 31(1)    | 31(1)    | 22(1)    | -4(1)    | 4(1)     | -5(1)    |
| N(2)   | 28(1)    | 26(1)    | 18(1)    | -1(1)    | 1(1)     | -2(1)    |
| N(3)   | 30(1)    | 28(1)    | 27(1)    | -2(1)    | 3(1)     | 0(1)     |
| N(4)   | 52(1)    | 32(1)    | 26(1)    | 6(1)     | 14(1)    | 10(1)    |
| C(1)   | 26(1)    | 34(1)    | 27(1)    | 2(1)     | 3(1)     | -7(1)    |
| C(2)   | 30(1)    | 30(1)    | 25(1)    | 0(1)     | 3(1)     | -1(1)    |
| C(3)   | 28(1)    | 32(1)    | 30(1)    | -2(1)    | 5(1)     | -3(1)    |
| C(4)   | 28(1)    | 36(1)    | 26(1)    | 2(1)     | 2(1)     | -7(1)    |

|        |       |       |       |       |        |        |
|--------|-------|-------|-------|-------|--------|--------|
| C(5)   | 27(1) | 37(1) | 36(1) | 8(1)  | 1(1)   | -3(1)  |
| C(6)   | 28(1) | 28(1) | 46(1) | 2(1)  | 4(1)   | -3(1)  |
| C(7)   | 41(1) | 61(1) | 33(1) | -4(1) | 7(1)   | 1(1)   |
| C(8)   | 40(1) | 26(1) | 55(1) | 1(1)  | 7(1)   | -5(1)  |
| C(9)   | 28(1) | 26(1) | 30(1) | 3(1)  | 2(1)   | 0(1)   |
| C(10)  | 28(1) | 42(1) | 44(1) | 2(1)  | 6(1)   | 2(1)   |
| C(11)  | 46(1) | 43(1) | 32(1) | -1(1) | 4(1)   | 5(1)   |
| C(12)  | 43(1) | 25(1) | 51(1) | 3(1)  | 1(1)   | 0(1)   |
| C(13)  | 51(1) | 45(1) | 54(1) | 2(1)  | -5(1)  | -22(1) |
| C(14)  | 41(1) | 66(1) | 31(1) | -7(1) | 8(1)   | 1(1)   |
| C(15A) | 24(2) | 32(1) | 30(2) | 0(1)  | -2(1)  | 1(1)   |
| C(16A) | 36(1) | 45(2) | 63(2) | -3(2) | 6(2)   | 9(1)   |
| C(17A) | 44(2) | 43(2) | 40(2) | 9(1)  | -12(1) | 1(2)   |
| C(18A) | 40(2) | 33(1) | 40(2) | 6(1)  | -4(1)  | -9(2)  |
| C(15B) | 24(2) | 32(1) | 30(2) | 0(1)  | -2(1)  | 1(1)   |
| C(16B) | 36(1) | 45(2) | 63(2) | -3(2) | 6(2)   | 9(1)   |
| C(17B) | 44(2) | 43(2) | 40(2) | 9(1)  | -12(1) | 1(2)   |
| C(18B) | 40(2) | 33(1) | 40(2) | 6(1)  | -4(1)  | -9(2)  |
| C(13') | 51(1) | 45(1) | 54(1) | 2(1)  | -5(1)  | -22(1) |
| C(14') | 41(1) | 66(1) | 31(1) | -7(1) | 8(1)   | 1(1)   |
| C(15') | 24(2) | 32(1) | 30(2) | 0(1)  | -2(1)  | 1(1)   |
| C(16') | 36(1) | 45(2) | 63(2) | -3(2) | 6(2)   | 9(1)   |
| C(17') | 44(2) | 43(2) | 40(2) | 9(1)  | -12(1) | 1(2)   |
| C(18') | 40(2) | 33(1) | 40(2) | 6(1)  | -4(1)  | -9(2)  |
| C(19)  | 33(1) | 36(1) | 28(1) | -4(1) | 8(1)   | -4(1)  |
| C(20)  | 34(1) | 30(1) | 23(1) | -3(1) | 2(1)   | -3(1)  |
| C(21)  | 27(1) | 21(1) | 19(1) | -1(1) | 6(1)   | 5(1)   |
| C(22)  | 26(1) | 22(1) | 22(1) | -2(1) | 4(1)   | 4(1)   |
| C(23)  | 32(1) | 24(1) | 26(1) | -1(1) | 11(1)  | 4(1)   |
| C(24)  | 39(1) | 27(1) | 20(1) | 3(1)  | 9(1)   | 9(1)   |
| C(25)  | 34(1) | 32(1) | 19(1) | -1(1) | 3(1)   | 7(1)   |
| C(26)  | 29(1) | 30(1) | 21(1) | -2(1) | 4(1)   | 0(1)   |

Table 11. Hydrogen coordinates ( $\times 10^4$ ) and isotropic displacement parameters ( $\text{\AA}^2 \times 10^3$ ) for **46**.

|       | x    | y     | z    | U(eq) |
|-------|------|-------|------|-------|
| H(2N) | 353  | 4790  | 3579 | 29    |
| H(1)  | 2644 | 10241 | 3483 | 35    |
| H(2)  | 2121 | 11740 | 4614 | 34    |
| H(3A) | 1311 | 9537  | 4391 | 36    |
| H(3B) | 1215 | 11308 | 3951 | 36    |
| H(4)  | 1057 | 9655  | 2821 | 36    |
| H(5A) | 2464 | 12755 | 2684 | 41    |
| H(5B) | 2107 | 13397 | 3350 | 41    |

|        |      |       |      |    |
|--------|------|-------|------|----|
| H(6A)  | 3011 | 14529 | 3643 | 41 |
| H(6B)  | 2936 | 13290 | 4370 | 41 |
| H(7A)  | 4083 | 13586 | 5289 | 67 |
| H(7B)  | 4724 | 13356 | 5163 | 67 |
| H(7C)  | 4334 | 11779 | 5216 | 67 |
| H(8A)  | 4057 | 15174 | 2937 | 61 |
| H(8B)  | 4608 | 15382 | 3630 | 61 |
| H(8C)  | 3999 | 15884 | 3819 | 61 |
| H(10A) | 5251 | 11572 | 4219 | 57 |
| H(10B) | 5241 | 12804 | 3464 | 57 |
| H(10C) | 5346 | 10881 | 3349 | 57 |
| H(11A) | 4539 | 10755 | 2172 | 61 |
| H(11B) | 4446 | 12689 | 2270 | 61 |
| H(11C) | 3931 | 11444 | 2275 | 61 |
| H(12A) | 4563 | 8880  | 3347 | 61 |
| H(12B) | 3949 | 9501  | 3458 | 61 |
| H(12C) | 4463 | 9559  | 4217 | 61 |
| H(13A) | 3486 | 10676 | 5738 | 77 |
| H(13B) | 3299 | 10938 | 6610 | 77 |
| H(13C) | 3024 | 12040 | 5843 | 77 |
| H(14A) | 1883 | 11055 | 6140 | 69 |
| H(14B) | 2143 | 9858  | 6877 | 69 |
| H(14C) | 1697 | 9164  | 6122 | 69 |
| H(16A) | 3388 | 5549  | 5676 | 72 |
| H(16B) | 3622 | 7394  | 5701 | 72 |
| H(16C) | 3138 | 6815  | 4965 | 72 |
| H(17A) | 3173 | 5961  | 7104 | 67 |
| H(17B) | 2787 | 7480  | 7278 | 67 |
| H(17C) | 3411 | 7798  | 7095 | 67 |
| H(18A) | 2173 | 6097  | 5258 | 59 |
| H(18B) | 2032 | 6386  | 6156 | 59 |
| H(18C) | 2449 | 4931  | 5999 | 59 |
| H(16D) | 3548 | 6028  | 5345 | 72 |
| H(16E) | 3638 | 7978  | 5341 | 72 |
| H(16F) | 3149 | 7145  | 4689 | 72 |
| H(17D) | 3394 | 6026  | 6844 | 67 |
| H(17E) | 3001 | 7438  | 7116 | 67 |
| H(17F) | 3581 | 7913  | 6822 | 67 |
| H(18D) | 2248 | 6097  | 5164 | 59 |
| H(18E) | 2234 | 6081  | 6127 | 59 |
| H(18F) | 2651 | 4872  | 5758 | 59 |
| H(13D) | 2785 | 11294 | 6291 | 77 |
| H(13E) | 3234 | 11706 | 5710 | 77 |
| H(13F) | 3418 | 10605 | 6513 | 77 |
| H(14D) | 3801 | 8832  | 5100 | 69 |
| H(14E) | 3432 | 7275  | 4738 | 69 |

|        |      |      |      |    |
|--------|------|------|------|----|
| H(14F) | 3712 | 7329 | 5689 | 69 |
| H(16G) | 1743 | 7167 | 6298 | 72 |
| H(16H) | 1794 | 8507 | 5607 | 72 |
| H(16I) | 1964 | 8982 | 6556 | 72 |
| H(17G) | 2807 | 8342 | 7347 | 67 |
| H(17H) | 3334 | 7688 | 6966 | 67 |
| H(17I) | 2900 | 6408 | 7249 | 67 |
| H(18G) | 2399 | 5092 | 5871 | 59 |
| H(18H) | 3005 | 5641 | 5691 | 59 |
| H(18I) | 2443 | 6165 | 5075 | 59 |
| H(19A) | 1694 | 7299 | 2695 | 39 |
| H(19B) | 1897 | 7446 | 3667 | 39 |
| H(20)  | 746  | 6641 | 2949 | 36 |
| H(23)  | -209 | 1286 | 5486 | 32 |
| H(25)  | 1241 | 3475 | 6594 | 34 |
| H(26)  | 1308 | 4870 | 5396 | 32 |

## Chemical Correlation:

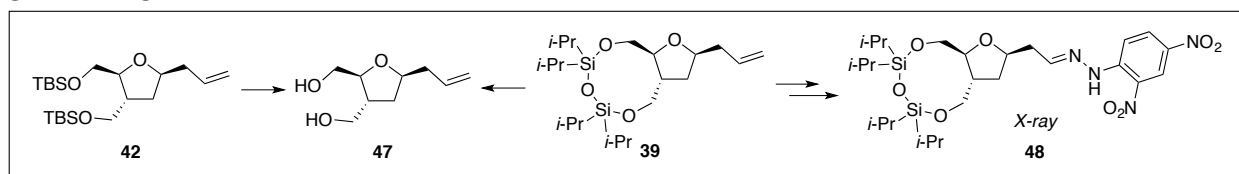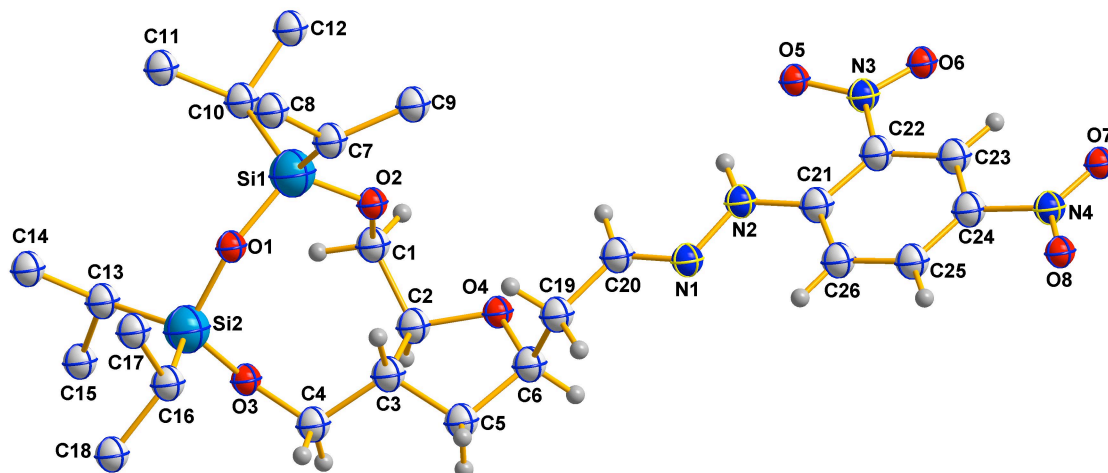X-ray Data Collection, Structure Solution and Refinement for **48**.

A colorless prismatic crystal with the size of  $0.04 \times 0.09 \times 0.56 \text{ mm}^3$  was selected for geometry and intensity data collection with a Bruker SMART APEXII CCD area detector on a D8 goniometer at 100 K. The temperature during the data collection was controlled with an Oxford Cryosystems Series 700+ instrument. Preliminary lattice parameters and orientation matrices were obtained from three sets of frames. Data were collected using graphite-monochromated and 0.5 mm-MonoCap-collimated Mo-K $\alpha$  radiation ( $\lambda = 0.71073 \text{ \AA}$ ) with the  $\omega$  scan method [1]. Data

were processed with the INTEGRATE program of the APEX2 software [1] for reduction and cell refinement. Multi-scan absorption corrections were applied by using the SCALE program for area detector. The structure was solved by the direct method and refined on  $F^2$  (SHELXTL) [2]. Non-hydrogen atoms were refined with anisotropic displacement parameters, and hydrogen atoms on carbons and nitrogen were placed in idealized positions (C-H = 0.95-1.00 Å and N-H = 0.88 Å) and included as riding with  $U_{iso}(H) = 1.2$  or  $1.5 U_{eq}(\text{non-H})$ .

[1] APEX2 (version 2011.4). *Program for Bruker CCD X-ray Diffractometer Control*, Bruker AXS Inc., Madison, WI, 2011.

[2] G. M. Sheldrick, SHELXTL, version 6.14. *Program for solution and refinement of crystal structures*, Universität Göttingen, Germany, 2009.

Table 12. Crystal data and structure refinement for **48**.

|                                 |                                                                                                                                 |
|---------------------------------|---------------------------------------------------------------------------------------------------------------------------------|
| Identification code             | 12kaw3h2                                                                                                                        |
| Empirical formula               | $C_{26}H_{44}N_4O_8Si_2$                                                                                                        |
| Formula weight                  | 596.83                                                                                                                          |
| Temperature                     | 100(2) K                                                                                                                        |
| Wavelength                      | 0.71073 Å                                                                                                                       |
| Crystal system, space group     | Monoclinic, $P2_1/c$                                                                                                            |
| Unit cell dimensions            | $a = 22.418(6)$ Å $\alpha = 90^\circ$<br>$b = 7.6590(19)$ Å $\beta = 100.870(4)^\circ$<br>$c = 18.298(5)$ Å $\gamma = 90^\circ$ |
| Volume                          | $3085.4(13)$ Å <sup>3</sup>                                                                                                     |
| Z, Calculated density           | 4, 1.285 Mg/m <sup>3</sup>                                                                                                      |
| Absorption coefficient          | $0.167$ mm <sup>-1</sup>                                                                                                        |
| F(000)                          | 1280                                                                                                                            |
| Crystal size                    | $0.56 \times 0.09 \times 0.04$ mm <sup>3</sup>                                                                                  |
| Theta range for data collection | 1.85 to 21.99°                                                                                                                  |
| Limiting indices                | $-23 \leq h \leq 23, -8 \leq k \leq 8, -19 \leq l \leq 19$                                                                      |
| Reflections collected / unique  | 31572 / 3768 [R(int) = 0.1028]                                                                                                  |
| Completeness to theta = 21.99°  | 100.0 %                                                                                                                         |
| Absorption correction           | Semi-empirical from equivalents                                                                                                 |
| Max. and min. transmission      | 0.9934 and 0.9125                                                                                                               |
| Refinement method               | Full-matrix least-squares on $F^2$                                                                                              |
| Data / restraints / parameters  | 3768 / 122 / 369                                                                                                                |
| Goodness-of-fit on $F^2$        | 1.033                                                                                                                           |
| Final R indices [I>2sigma(I)]   | R1 = 0.0933, wR2 = 0.2181                                                                                                       |
| R indices (all data)            | R1 = 0.1617, wR2 = 0.2357                                                                                                       |
| Largest diff. peak and hole     | 0.527 and -0.403 e.Å <sup>-3</sup>                                                                                              |

Table 13. Atomic coordinates ( $\times 10^4$ ) and equivalent isotropic displacement parameters (Å<sup>2</sup>  $\times 10^3$ ) for **48**.  $U_{eq}$  is defined as one third of the trace of the orthogonalized  $U^{ij}$  tensor.

|       | x       | y      | z      | $U_{eq}$ |
|-------|---------|--------|--------|----------|
| Si(1) | 1989(1) | 843(4) | 190(2) | 57(1)    |

|       |         |           |          |        |
|-------|---------|-----------|----------|--------|
| Si(2) | 1416(1) | -737(4)   | 1508(2)  | 61(1)  |
| O(1)  | 1554(3) | 300(9)    | 770(4)   | 65(2)  |
| O(2)  | 2688(3) | 1143(8)   | 626(3)   | 47(2)  |
| O(3)  | 2040(3) | -894(9)   | 2117(4)  | 53(2)  |
| O(4)  | 3688(3) | 1996(8)   | 1848(3)  | 44(2)  |
| O(5)  | 5348(3) | 6373(8)   | 54(3)    | 37(2)  |
| O(6)  | 6163(3) | 7916(8)   | 67(3)    | 52(2)  |
| O(7)  | 6323(3) | 13722(8)  | 976(4)   | 55(2)  |
| O(8)  | 5695(3) | 14662(8)  | 1642(4)  | 46(2)  |
| N(1)  | 4199(3) | 6859(10)  | 1443(4)  | 35(2)  |
| N(2)  | 4636(3) | 7125(9)   | 1000(4)  | 32(2)  |
| N(3)  | 5669(4) | 7657(11)  | 257(4)   | 37(2)  |
| N(4)  | 5898(4) | 13512(10) | 1292(5)  | 46(2)  |
| C(1)  | 3032(4) | -81(13)   | 1095(6)  | 50(3)  |
| C(2)  | 3225(4) | 696(13)   | 1881(5)  | 43(3)  |
| C(3)  | 2743(4) | 1592(12)  | 2207(5)  | 41(3)  |
| C(4)  | 2356(5) | 363(14)   | 2591(6)  | 60(3)  |
| C(5)  | 3100(4) | 2912(12)  | 2710(5)  | 43(3)  |
| C(6)  | 3599(4) | 3482(12)  | 2296(5)  | 40(3)  |
| C(7)  | 1764(5) | 2999(17)  | -182(7)  | 90(4)  |
| C(8)  | 1132(5) | 3218(19)  | -606(8)  | 120(4) |
| C(9)  | 2266(6) | 4099(18)  | -410(7)  | 105(5) |
| C(10) | 1976(5) | -965(16)  | -467(6)  | 72(3)  |
| C(11) | 1337(5) | -1491(16) | -910(6)  | 88(4)  |
| C(12) | 2369(5) | -695(16)  | -1043(6) | 81(4)  |
| C(13) | 1219(6) | -3044(16) | 1225(7)  | 87(4)  |
| C(14) | 562(5)  | -3306(17) | 780(7)   | 98(4)  |
| C(15) | 1382(6) | -4418(17) | 1831(7)  | 106(5) |
| C(16) | 859(6)  | 657(18)   | 1865(7)  | 97(4)  |
| C(17) | 342(5)  | 1301(17)  | 1258(7)  | 95(4)  |
| C(18) | 586(6)  | -300(20)  | 2466(8)  | 115(4) |
| C(19) | 3434(4) | 5039(11)  | 1786(5)  | 40(3)  |
| C(20) | 3908(4) | 5426(12)  | 1344(5)  | 36(2)  |
| C(21) | 4971(4) | 8612(11)  | 1098(4)  | 26(2)  |
| C(22) | 5461(4) | 8930(11)  | 730(4)   | 26(2)  |
| C(23) | 5774(4) | 10541(13) | 818(5)   | 38(2)  |
| C(24) | 5588(4) | 11781(12) | 1252(5)  | 31(2)  |
| C(25) | 5117(4) | 11507(12) | 1625(5)  | 35(2)  |
| C(26) | 4824(4) | 9953(12)  | 561(5)   | 32(2)  |

Table 14. Bond lengths [ $\text{\AA}$ ] and angles [ $^\circ$ ] for **48**.

|             |           |
|-------------|-----------|
| Si(1)-O(1)  | 1.626(7)  |
| Si(1)-O(2)  | 1.634(7)  |
| Si(1)-C(7)  | 1.821(13) |
| Si(1)-C(10) | 1.830(12) |

|              |           |
|--------------|-----------|
| Si(2)-O(3)   | 1.620(7)  |
| Si(2)-O(1)   | 1.646(7)  |
| Si(2)-C(16)  | 1.851(13) |
| Si(2)-C(13)  | 1.871(12) |
| O(2)-C(1)    | 1.400(11) |
| O(3)-C(4)    | 1.396(11) |
| O(4)-C(6)    | 1.439(10) |
| O(4)-C(2)    | 1.448(10) |
| O(5)-N(3)    | 1.234(9)  |
| O(6)-N(3)    | 1.236(8)  |
| O(7)-N(4)    | 1.214(9)  |
| O(8)-N(4)    | 1.227(9)  |
| N(1)-C(20)   | 1.273(1)  |
| N(1)-N(2)    | 1.399(9)  |
| N(2)-C(21)   | 1.357(10) |
| N(2)-H(2N)   | 0.8800    |
| N(3)-C(22)   | 1.439(10) |
| N(4)-C(24)   | 1.493(11) |
| C(1)-C(2)    | 1.542(12) |
| C(1)-H(1A)   | 0.9900    |
| C(1)-H(1B)   | 0.9900    |
| C(2)-C(3)    | 1.496(11) |
| C(2)-H(2)    | 1.0000    |
| C(3)-C(5)    | 1.493(12) |
| C(3)-C(4)    | 1.536(12) |
| C(3)-H(3)    | 1.0000    |
| C(4)-H(4A)   | 0.9900    |
| C(4)-H(4B)   | 0.9900    |
| C(5)-C(6)    | 1.527(11) |
| C(5)-H(5A)   | 0.9900    |
| C(5)-H(5B)   | 0.9900    |
| C(6)-C(19)   | 1.517(12) |
| C(6)-H(6)    | 1.0000    |
| C(7)-C(8)    | 1.492(9)  |
| C(7)-C(9)    | 1.525(15) |
| C(7)-H(7)    | 1.0000    |
| C(8)-H(8A)   | 0.9800    |
| C(8)-H(8B)   | 0.9800    |
| C(8)-H(8C)   | 0.9800    |
| C(9)-H(9A)   | 0.9800    |
| C(9)-H(9B)   | 0.9800    |
| C(9)-H(9C)   | 0.9800    |
| C(10)-C(12)  | 1.510(13) |
| C(10)-C(11)  | 1.561(15) |
| C(10)-H(10)  | 1.0000    |
| C(11)-H(11A) | 0.9800    |

|              |           |
|--------------|-----------|
| C(11)-H(11B) | 0.9800    |
| C(11)-H(11C) | 0.9800    |
| C(12)-H(12A) | 0.9800    |
| C(12)-H(12B) | 0.9800    |
| C(12)-H(12C) | 0.9800    |
| C(13)-C(15)  | 1.522(15) |
| C(13)-C(14)  | 1.556(16) |
| C(13)-H(13)  | 1.0000    |
| C(14)-H(14A) | 0.9800    |
| C(14)-H(14B) | 0.9800    |
| C(14)-H(14C) | 0.9800    |
| C(15)-H(15A) | 0.9800    |
| C(15)-H(15B) | 0.9800    |
| C(15)-H(15C) | 0.9800    |
| C(16)-C(17)  | 1.528(16) |
| C(16)-C(18)  | 1.543(16) |
| C(16)-H(16)  | 1.0000    |
| C(17)-H(17A) | 0.9800    |
| C(17)-H(17B) | 0.9800    |
| C(17)-H(17C) | 0.9800    |
| C(18)-H(18A) | 0.9800    |
| C(18)-H(18B) | 0.9800    |
| C(18)-H(18C) | 0.9800    |
| C(19)-C(20)  | 1.481(11) |
| C(19)-H(19A) | 0.9900    |
| C(19)-H(19B) | 0.9900    |
| C(20)-H(20)  | 0.9500    |
| C(21)-C(26)  | 1.410(11) |
| C(21)-C(22)  | 1.414(11) |
| C(22)-C(23)  | 1.413(12) |
| C(23)-C(24)  | 1.355(11) |
| C(23)-H(23)  | 0.9500    |
| C(24)-C(25)  | 1.376(11) |
| C(25)-C(26)  | 1.354(11) |
| C(25)-H(25)  | 0.9500    |
| C(26)-H(26)  | 0.9500    |

|                  |          |
|------------------|----------|
| O(1)-Si(1)-O(2)  | 110.8(4) |
| O(1)-Si(1)-C(7)  | 108.5(5) |
| O(2)-Si(1)-C(7)  | 103.2(5) |
| O(1)-Si(1)-C(10) | 107.3(4) |
| O(2)-Si(1)-C(10) | 108.8(4) |
| C(7)-Si(1)-C(10) | 118.2(6) |
| O(3)-Si(2)-O(1)  | 109.2(4) |
| O(3)-Si(2)-C(16) | 110.7(5) |
| O(1)-Si(2)-C(16) | 104.7(5) |



|                   |          |
|-------------------|----------|
| O(3)-Si(2)-C(13)  | 104.4(5) |
| O(1)-Si(2)-C(13)  | 107.4(5) |
| C(16)-Si(2)-C(13) | 120.2(6) |
| Si(1)-O(1)-Si(2)  | 152.6(5) |
| C(1)-O(2)-Si(1)   | 124.9(6) |
| C(4)-O(3)-Si(2)   | 130.4(7) |
| C(6)-O(4)-C(2)    | 110.0(6) |
| C(20)-N(1)-N(2)   | 116.1(7) |
| C(21)-N(2)-N(1)   | 118.4(7) |
| C(21)-N(2)-H(2N)  | 120.8    |
| N(1)-N(2)-H(2N)   | 120.8    |
| O(5)-N(3)-O(6)    | 123.1(8) |
| O(5)-N(3)-C(22)   | 119.0(8) |
| O(6)-N(3)-C(22)   | 117.9(8) |
| O(7)-N(4)-O(8)    | 123.8(8) |
| O(7)-N(4)-C(24)   | 119.6(8) |
| O(8)-N(4)-C(24)   | 116.5(8) |
| O(2)-C(1)-C(2)    | 109.7(8) |
| O(2)-C(1)-H(1A)   | 109.7    |
| C(2)-C(1)-H(1A)   | 109.7    |
| O(2)-C(1)-H(1B)   | 109.7    |
| C(2)-C(1)-H(1B)   | 109.7    |
| H(1A)-C(1)-H(1B)  | 108.2    |
| O(4)-C(2)-C(3)    | 106.2(7) |
| O(4)-C(2)-C(1)    | 107.6(7) |
| C(3)-C(2)-C(1)    | 117.0(8) |
| O(4)-C(2)-H(2)    | 108.6    |
| C(3)-C(2)-H(2)    | 108.6    |
| C(1)-C(2)-H(2)    | 108.6    |
| C(5)-C(3)-C(2)    | 102.3(7) |
| C(5)-C(3)-C(4)    | 114.6(8) |
| C(2)-C(3)-C(4)    | 114.4(8) |
| C(5)-C(3)-H(3)    | 108.4    |
| C(2)-C(3)-H(3)    | 108.4    |
| C(4)-C(3)-H(3)    | 108.4    |
| O(3)-C(4)-C(3)    | 113.8(8) |
| O(3)-C(4)-H(4A)   | 108.8    |
| C(3)-C(4)-H(4A)   | 108.8    |
| O(3)-C(4)-H(4B)   | 108.8    |
| C(3)-C(4)-H(4B)   | 108.8    |
| H(4A)-C(4)-H(4B)  | 107.7    |
| C(3)-C(5)-C(6)    | 104.3(7) |
| C(3)-C(5)-H(5A)   | 110.9    |
| C(6)-C(5)-H(5A)   | 110.9    |
| C(3)-C(5)-H(5B)   | 110.9    |
| C(6)-C(5)-H(5B)   | 110.9    |

|                     |           |
|---------------------|-----------|
| H(5A)-C(5)-H(5B)    | 108.9     |
| O(4)-C(6)-C(19)     | 108.3(7)  |
| O(4)-C(6)-C(5)      | 104.5(7)  |
| C(19)-C(6)-C(5)     | 114.4(8)  |
| O(4)-C(6)-H(6)      | 109.8     |
| C(19)-C(6)-H(6)     | 109.8     |
| C(5)-C(6)-H(6)      | 109.8     |
| C(8)-C(7)-C(9)      | 118.2(11) |
| C(8)-C(7)-Si(1)     | 117.7(10) |
| C(9)-C(7)-Si(1)     | 115.9(9)  |
| C(8)-C(7)-H(7)      | 99.6      |
| C(9)-C(7)-H(7)      | 99.6      |
| Si(1)-C(7)-H(7)     | 99.6      |
| C(7)-C(8)-H(8A)     | 109.5     |
| C(7)-C(8)-H(8B)     | 109.5     |
| H(8A)-C(8)-H(8B)    | 109.5     |
| C(7)-C(8)-H(8C)     | 109.5     |
| H(8A)-C(8)-H(8C)    | 109.5     |
| H(8B)-C(8)-H(8C)    | 109.5     |
| C(7)-C(9)-H(9A)     | 109.5     |
| C(7)-C(9)-H(9B)     | 109.5     |
| H(9A)-C(9)-H(9B)    | 109.5     |
| C(7)-C(9)-H(9C)     | 109.5     |
| H(9A)-C(9)-H(9C)    | 109.5     |
| H(9B)-C(9)-H(9C)    | 109.5     |
| C(12)-C(10)-C(11)   | 105.8(9)  |
| C(12)-C(10)-Si(1)   | 114.6(8)  |
| C(11)-C(10)-Si(1)   | 115.8(8)  |
| C(12)-C(10)-H(10)   | 106.7     |
| C(11)-C(10)-H(10)   | 106.7     |
| Si(1)-C(10)-H(10)   | 106.7     |
| C(10)-C(11)-H(11A)  | 109.5     |
| C(10)-C(11)-H(11B)  | 109.5     |
| H(11A)-C(11)-H(11B) | 109.5     |
| C(10)-C(11)-H(11C)  | 109.5     |
| H(11A)-C(11)-H(11C) | 109.5     |
| H(11B)-C(11)-H(11C) | 109.5     |
| C(10)-C(12)-H(12A)  | 109.5     |
| C(10)-C(12)-H(12B)  | 109.5     |
| H(12A)-C(12)-H(12B) | 109.5     |
| C(10)-C(12)-H(12C)  | 109.5     |
| H(12A)-C(12)-H(12C) | 109.5     |
| H(12B)-C(12)-H(12C) | 109.5     |
| C(15)-C(13)-C(14)   | 111.4(11) |
| C(15)-C(13)-Si(2)   | 116.0(9)  |
| C(14)-C(13)-Si(2)   | 114.7(9)  |

|                     |           |
|---------------------|-----------|
| C(15)-C(13)-H(13)   | 104.4     |
| C(14)-C(13)-H(13)   | 104.4     |
| Si(2)-C(13)-H(13)   | 104.4     |
| C(13)-C(14)-H(14A)  | 109.5     |
| C(13)-C(14)-H(14B)  | 109.5     |
| H(14A)-C(14)-H(14B) | 109.5     |
| C(13)-C(14)-H(14C)  | 109.5     |
| H(14A)-C(14)-H(14C) | 109.5     |
| H(14B)-C(14)-H(14C) | 109.5     |
| C(13)-C(15)-H(15A)  | 109.5     |
| C(13)-C(15)-H(15B)  | 109.5     |
| H(15A)-C(15)-H(15B) | 109.5     |
| C(13)-C(15)-H(15C)  | 109.5     |
| H(15A)-C(15)-H(15C) | 109.5     |
| H(15B)-C(15)-H(15C) | 109.5     |
| C(17)-C(16)-C(18)   | 108.8(11) |
| C(17)-C(16)-Si(2)   | 113.6(9)  |
| C(18)-C(16)-Si(2)   | 111.3(10) |
| C(17)-C(16)-H(16)   | 107.7     |
| C(18)-C(16)-H(16)   | 107.7     |
| Si(2)-C(16)-H(16)   | 107.7     |
| C(16)-C(17)-H(17A)  | 109.5     |
| C(16)-C(17)-H(17B)  | 109.5     |
| H(17A)-C(17)-H(17B) | 109.5     |
| C(16)-C(17)-H(17C)  | 109.5     |
| H(17A)-C(17)-H(17C) | 109.5     |
| H(17B)-C(17)-H(17C) | 109.5     |
| C(16)-C(18)-H(18A)  | 109.5     |
| C(16)-C(18)-H(18B)  | 109.5     |
| H(18A)-C(18)-H(18B) | 109.5     |
| C(16)-C(18)-H(18C)  | 109.5     |
| H(18A)-C(18)-H(18C) | 109.5     |
| H(18B)-C(18)-H(18C) | 109.5     |
| C(20)-C(19)-C(6)    | 112.1(8)  |
| C(20)-C(19)-H(19A)  | 109.2     |
| C(6)-C(19)-H(19A)   | 109.2     |
| C(20)-C(19)-H(19B)  | 109.2     |
| C(6)-C(19)-H(19B)   | 109.2     |
| H(19A)-C(19)-H(19B) | 107.9     |
| N(1)-C(20)-C(19)    | 119.8(8)  |
| N(1)-C(20)-H(20)    | 120.1     |
| C(19)-C(20)-H(20)   | 120.1     |
| N(2)-C(21)-C(26)    | 120.3(8)  |
| N(2)-C(21)-C(22)    | 122.9(8)  |
| C(26)-C(21)-C(22)   | 116.8(8)  |
| C(23)-C(22)-C(21)   | 120.7(8)  |

|                   |          |
|-------------------|----------|
| C(23)-C(22)-N(3)  | 116.7(8) |
| C(21)-C(22)-N(3)  | 122.6(8) |
| C(24)-C(23)-C(22) | 118.5(8) |
| C(24)-C(23)-H(23) | 120.8    |
| C(22)-C(23)-H(23) | 120.8    |
| C(23)-C(24)-C(25) | 122.3(8) |
| C(23)-C(24)-N(4)  | 117.3(8) |
| C(25)-C(24)-N(4)  | 120.4(9) |
| C(26)-C(25)-C(24) | 119.8(8) |
| C(26)-C(25)-H(25) | 120.1    |
| C(24)-C(25)-H(25) | 120.1    |
| C(25)-C(26)-C(21) | 121.8(8) |
| C(25)-C(26)-H(26) | 119.1    |
| C(21)-C(26)-H(26) | 119.1    |

Symmetry transformations used to generate equivalent atoms:

Table 15. Anisotropic displacement parameters ( $\text{\AA}^2 \times 10^3$ ) for **48**. The anisotropic displacement factor exponent takes the form:  $-2 \pi^2 [ h^2 a^{*2} U^{11} + \dots + 2 h k a^* b^* U^{12} ]$

|       | U11    | U22    | U33    | U23    | U13   | U12    |
|-------|--------|--------|--------|--------|-------|--------|
| Si(1) | 53(2)  | 62(2)  | 60(2)  | 2(2)   | 18(2) | 0(2)   |
| Si(2) | 45(2)  | 70(2)  | 67(2)  | 16(2)  | 10(2) | -6(2)  |
| O(1)  | 56(4)  | 81(4)  | 61(4)  | 7(3)   | 15(3) | -6(3)  |
| O(2)  | 40(4)  | 47(4)  | 56(5)  | 5(4)   | 12(4) | 2(4)   |
| O(3)  | 51(4)  | 52(4)  | 57(4)  | 7(3)   | 13(3) | -12(3) |
| O(4)  | 42(4)  | 27(4)  | 65(5)  | -4(3)  | 19(4) | 1(3)   |
| O(5)  | 49(4)  | 25(4)  | 40(4)  | -3(3)  | 17(3) | -6(3)  |
| O(6)  | 54(4)  | 47(4)  | 62(4)  | -12(3) | 32(4) | -10(3) |
| O(7)  | 58(4)  | 34(4)  | 76(4)  | 3(3)   | 24(4) | -4(3)  |
| O(8)  | 57(5)  | 25(4)  | 56(5)  | -7(4)  | 11(4) | 1(3)   |
| N(1)  | 43(5)  | 29(5)  | 35(5)  | -5(4)  | 14(4) | 11(4)  |
| N(2)  | 37(5)  | 29(5)  | 34(5)  | 0(4)   | 17(4) | 11(4)  |
| N(3)  | 46(6)  | 37(6)  | 32(5)  | 1(4)   | 17(4) | 2(5)   |
| N(4)  | 50(6)  | 26(6)  | 59(6)  | -6(5)  | 2(5)  | 4(5)   |
| C(1)  | 42(7)  | 38(7)  | 72(8)  | -8(6)  | 13(6) | 11(5)  |
| C(2)  | 37(6)  | 36(6)  | 56(7)  | -3(6)  | 12(5) | -2(5)  |
| C(3)  | 45(6)  | 35(6)  | 44(6)  | 4(5)   | 11(5) | -3(5)  |
| C(4)  | 58(5)  | 62(5)  | 63(5)  | 7(4)   | 19(4) | -3(4)  |
| C(5)  | 45(4)  | 44(4)  | 44(4)  | 4(4)   | 15(4) | 2(4)   |
| C(6)  | 45(4)  | 37(4)  | 40(4)  | -3(4)  | 10(4) | 5(4)   |
| C(7)  | 84(5)  | 89(5)  | 97(5)  | 14(4)  | 14(4) | 4(4)   |
| C(8)  | 106(7) | 111(7) | 134(7) | 22(6)  | 3(6)  | -3(6)  |
| C(9)  | 103(8) | 102(8) | 114(8) | 24(7)  | 30(7) | -4(7)  |

|       |        |        |        |        |       |        |
|-------|--------|--------|--------|--------|-------|--------|
| C(10) | 61(8)  | 75(9)  | 85(9)  | -3(7)  | 23(7) | -9(7)  |
| C(11) | 96(8)  | 96(8)  | 75(7)  | -10(6) | 27(6) | -28(6) |
| C(12) | 89(7)  | 80(7)  | 81(7)  | -20(6) | 38(6) | -12(6) |
| C(13) | 85(6)  | 80(6)  | 91(6)  | 8(4)   | 5(4)  | -9(4)  |
| C(14) | 82(8)  | 98(8)  | 108(8) | 4(7)   | 1(7)  | -22(6) |
| C(15) | 128(9) | 88(8)  | 96(8)  | 9(7)   | 1(7)  | -16(7) |
| C(16) | 97(5)  | 101(6) | 95(5)  | 12(4)  | 26(4) | 8(4)   |
| C(17) | 81(7)  | 100(8) | 106(8) | 15(7)  | 18(7) | 12(6)  |
| C(18) | 117(7) | 125(7) | 114(7) | 10(6)  | 46(6) | 15(6)  |
| C(19) | 57(7)  | 29(6)  | 42(6)  | -8(5)  | 31(6) | -2(5)  |
| C(20) | 56(7)  | 22(6)  | 34(6)  | -7(5)  | 21(5) | -4(5)  |
| C(21) | 31(5)  | 21(6)  | 24(5)  | 6(5)   | 3(5)  | 1(5)   |
| C(22) | 35(5)  | 27(6)  | 20(5)  | 1(4)   | 16(4) | 6(5)   |
| C(23) | 30(6)  | 45(7)  | 37(6)  | 5(5)   | 3(5)  | -2(5)  |
| C(24) | 32(6)  | 22(6)  | 37(6)  | 1(5)   | 0(5)  | -1(5)  |
| C(25) | 35(6)  | 29(6)  | 44(6)  | -11(5) | 11(5) | 10(5)  |
| C(26) | 37(6)  | 26(6)  | 39(6)  | -5(5)  | 18(5) | 4(5)   |

Table 16. Hydrogen coordinates ( $\times 10^4$ ) and isotropic displacement parameters ( $\text{\AA}^2 \times 10^3$ ) for **48**.

|        | x    | y     | z     | U(eq) |
|--------|------|-------|-------|-------|
| H(2N)  | 4692 | 6347  | 666   | 38    |
| H(1A)  | 3398 | -400  | 893   | 60    |
| H(1B)  | 2790 | -1152 | 1119  | 60    |
| H(2)   | 3406 | -255  | 2227  | 51    |
| H(3)   | 2467 | 2225  | 1799  | 49    |
| H(4A)  | 2625 | -236  | 3007  | 72    |
| H(4B)  | 2061 | 1069  | 2805  | 72    |
| H(5A)  | 3276 | 2387  | 3197  | 52    |
| H(5B)  | 2841 | 3914  | 2791  | 52    |
| H(6)   | 3981 | 3733  | 2661  | 49    |
| H(7)   | 1725 | 3612  | 290   | 109   |
| H(8A)  | 1067 | 4438  | -761  | 179   |
| H(8B)  | 843  | 2895  | -289  | 179   |
| H(8C)  | 1071 | 2464  | -1047 | 179   |
| H(9A)  | 2435 | 3479  | -793  | 157   |
| H(9B)  | 2587 | 4306  | 24    | 157   |
| H(9C)  | 2097 | 5220  | -610  | 157   |
| H(10)  | 2142 | -2009 | -168  | 87    |
| H(11A) | 1185 | -576  | -1272 | 131   |
| H(11B) | 1055 | -1633 | -564  | 131   |
| H(11C) | 1368 | -2594 | -1171 | 131   |
| H(12A) | 2390 | -1785 | -1318 | 121   |
| H(12B) | 2778 | -349  | -796  | 121   |

|        |      |       |       |     |
|--------|------|-------|-------|-----|
| H(12C) | 2192 | 225   | -1390 | 121 |
| H(13)  | 1485 | -3323 | 859   | 104 |
| H(14A) | 544  | -4375 | 482   | 147 |
| H(14B) | 447  | -2304 | 451   | 147 |
| H(14C) | 280  | -3406 | 1128  | 147 |
| H(15A) | 1149 | -4206 | 2225  | 159 |
| H(15B) | 1817 | -4352 | 2040  | 159 |
| H(15C) | 1284 | -5580 | 1618  | 159 |
| H(16)  | 1081 | 1706  | 2102  | 116 |
| H(17A) | 61   | 335   | 1095  | 143 |
| H(17B) | 508  | 1735  | 835   | 143 |
| H(17C) | 123  | 2245  | 1456  | 143 |
| H(18A) | 165  | 83    | 2441  | 173 |
| H(18B) | 825  | -28   | 2959  | 173 |
| H(18C) | 593  | -1562 | 2381  | 173 |
| H(19A) | 3045 | 4801  | 1443  | 48  |
| H(19B) | 3375 | 6075  | 2088  | 48  |
| H(20)  | 3994 | 4606  | 989   | 43  |
| H(23)  | 6108 | 10749 | 577   | 45  |
| H(25)  | 4999 | 12404 | 1927  | 42  |
| H(26)  | 4510 | 9762  | 1836  | 39  |

---

### III. Details of Computation

Low-energy conformations of the oxocarbenium ions of interest were found using the conformational search package on Spartan 10 applying semi-empirical methods (PM3). A sparse systematic was performed with three-fold rotational freedom for all endocyclic bonds and six-fold rotational freedom for exocyclic bonds. Spartan 10 keeps 100 conformers while searching for the lowest energy ones. Duplicates were removed and the remaining low energy conformers were subjected to energy optimization at higher levels of theory, beginning with the Hartree–Fock method (HF/3-21G). Resulting conformers were further optimized at the HF/6-31G\* level of theory and with density functional theory (B3LYP/6-31G\*).

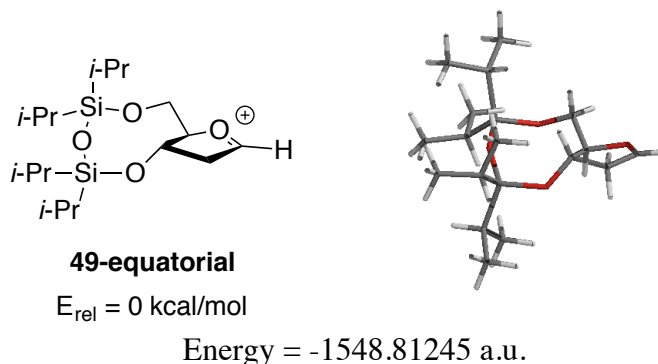

#### Cartesian Coordinates (Angstroms)

| ATOM | X         | Y         | Z         |
|------|-----------|-----------|-----------|
| C    | -1.88827  | 1.494464  | -0.281843 |
| H    | -1.366777 | 1.432022  | -1.241831 |
| C    | -3.215077 | 2.26456   | -0.46591  |
| H    | -4.015696 | 1.846106  | 0.167911  |
| H    | -3.618738 | 2.296144  | -1.483846 |
| C    | -1.075132 | 2.396966  | 0.684152  |
| H    | -1.181302 | 2.072256  | 1.721053  |
| C    | -2.910046 | 3.60287   | 0.032536  |
| H    | -3.529088 | 4.49804   | -0.031648 |
| O    | -1.798692 | 3.720282  | 0.62755   |
| C    | 0.391097  | 2.685551  | 0.363992  |
| H    | 0.526772  | 2.838333  | -0.713703 |
| H    | 0.692461  | 3.604389  | 0.875801  |
| O    | 1.189935  | 1.62671   | 0.864235  |
| O    | -2.115019 | 0.213281  | 0.264735  |
| Si   | 1.701208  | 0.226892  | 0.101629  |
| Si   | -1.210412 | -1.172002 | -0.041031 |
| O    | 0.370708  | -0.711263 | -0.234252 |
| C    | 2.758644  | -0.611243 | 1.437457  |
| H    | 2.069927  | -0.669158 | 2.295304  |

|   |           |           |           |
|---|-----------|-----------|-----------|
| C | 2.502106  | 0.656767  | -1.570212 |
| H | 1.669326  | 1.04845   | -2.17628  |
| C | -1.474235 | -2.274469 | 1.481591  |
| H | -0.74123  | -3.090995 | 1.390298  |
| C | -1.790412 | -2.013685 | -1.640486 |
| H | -2.840727 | -2.286649 | -1.456367 |
| C | 3.564443  | 1.771041  | -1.487413 |
| H | 3.881692  | 2.082522  | -2.491806 |
| H | 4.465732  | 1.438436  | -0.958771 |
| H | 3.198996  | 2.663483  | -0.968279 |
| C | 3.046104  | -0.572222 | -2.325375 |
| H | 2.302595  | -1.37175  | -2.413524 |
| H | 3.92876   | -0.99833  | -1.832454 |
| H | 3.354211  | -0.300947 | -3.344206 |
| C | 3.188957  | -2.052377 | 1.10403   |
| H | 3.911456  | -2.087494 | 0.279788  |
| H | 2.342374  | -2.686962 | 0.821265  |
| H | 3.672938  | -2.524987 | 1.969376  |
| C | 3.959935  | 0.241285  | 1.88935   |
| H | 3.663915  | 1.264112  | 2.143272  |
| H | 4.735738  | 0.301556  | 1.115994  |
| H | 4.43503   | -0.193469 | 2.779331  |
| C | -1.198192 | -1.536829 | 2.805039  |
| H | -0.185565 | -1.12081  | 2.847394  |
| H | -1.304231 | -2.214314 | 3.663359  |
| H | -1.905673 | -0.713572 | 2.953456  |
| C | -2.88074  | -2.907204 | 1.502792  |
| H | -3.082591 | -3.518371 | 0.616198  |
| H | -3.666058 | -2.144024 | 1.563841  |
| H | -3.002165 | -3.560048 | 2.377828  |
| C | -1.765953 | -1.097108 | -2.878372 |
| H | -2.118351 | -1.633343 | -3.770316 |
| H | -0.755271 | -0.736146 | -3.102314 |
| H | -2.420756 | -0.226996 | -2.758641 |
| C | -1.013044 | -3.31779  | -1.909639 |
| H | 0.050618  | -3.124322 | -2.094191 |
| H | -1.405517 | -3.831515 | -2.797337 |
| H | -1.074768 | -4.026445 | -1.075174 |



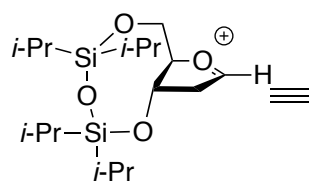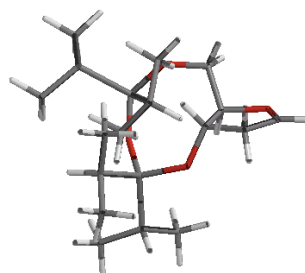**49-axial**E<sub>rel</sub> = +0.27 kcal/mol

Energy = -1548.81200 a.u.

## Cartesian Coordinates (Angstroms)

| ATOM | X         | Y         | Z         |
|------|-----------|-----------|-----------|
| C    | -1.69201  | 1.545547  | -0.552137 |
| H    | -1.303907 | 1.289931  | -1.540605 |
| C    | -2.86922  | 2.537161  | -0.662952 |
| H    | -3.818147 | 2.125148  | -0.293799 |
| H    | -3.076121 | 2.886675  | -1.685845 |
| C    | -0.62014  | 2.327226  | 0.244097  |
| H    | -0.403228 | 1.849597  | 1.200074  |
| C    | -2.458603 | 3.681308  | 0.145392  |
| H    | -3.033296 | 4.58017   | 0.369489  |
| O    | -1.291902 | 3.614522  | 0.634135  |
| C    | 0.657157  | 2.701313  | -0.511708 |
| H    | 0.410814  | 3.328634  | -1.374412 |
| H    | 1.319593  | 3.274796  | 0.145635  |
| O    | 1.296115  | 1.536197  | -1.006793 |
| O    | -2.105396 | 0.386881  | 0.152204  |
| Si   | 1.747281  | 0.138305  | -0.199924 |
| Si   | -1.258093 | -1.067834 | 0.203414  |
| O    | 0.360314  | -0.706829 | 0.145597  |
| C    | 2.614288  | 0.604273  | 1.42753   |
| H    | 1.872948  | 1.166522  | 2.017849  |
| C    | 2.856759  | -0.828449 | -1.40158  |
| H    | 3.883931  | -0.526605 | -1.142482 |
| C    | -1.709733 | -1.840177 | 1.871209  |
| H    | -2.791964 | -2.034724 | 1.819373  |
| C    | -1.74838  | -2.15199  | -1.278776 |
| H    | -1.007029 | -2.965574 | -1.316721 |
| C    | 2.757968  | -2.352001 | -1.18731  |
| H    | 3.473807  | -2.884999 | -1.827523 |
| H    | 1.758846  | -2.727216 | -1.435957 |
| H    | 2.966052  | -2.650453 | -0.15333  |
| C    | 2.636633  | -0.462132 | -2.881193 |

|   |           |           |           |
|---|-----------|-----------|-----------|
| H | 2.750278  | 0.611263  | -3.056906 |
| H | 1.635933  | -0.746955 | -3.228595 |
| H | 3.357665  | -0.98612  | -3.523265 |
| C | 3.032121  | -0.61304  | 2.275553  |
| H | 3.806423  | -1.20854  | 1.77502   |
| H | 2.192664  | -1.28199  | 2.493795  |
| H | 3.453773  | -0.294234 | 3.238384  |
| C | 3.817153  | 1.541288  | 1.192673  |
| H | 4.630255  | 1.03214   | 0.660006  |
| H | 4.23334   | 1.891097  | 2.146729  |
| H | 3.55387   | 2.427346  | 0.605303  |
| C | -1.00588  | -3.191989 | 2.103023  |
| H | -1.221264 | -3.921354 | 1.313177  |
| H | -1.325872 | -3.641831 | 3.052112  |
| H | 0.083984  | -3.079892 | 2.152403  |
| C | -1.472294 | -0.879246 | 3.050671  |
| H | -2.024273 | 0.057683  | 2.924171  |
| H | -0.409313 | -0.634532 | 3.166966  |
| H | -1.80168  | -1.327457 | 3.99807   |
| C | -3.140874 | -2.788177 | -1.091798 |
| H | -3.411304 | -3.401608 | -1.961679 |
| H | -3.922653 | -2.026274 | -0.98293  |
| H | -3.192547 | -3.437045 | -0.210754 |
| C | -1.685652 | -1.396172 | -2.620279 |
| H | -0.706685 | -0.938799 | -2.801605 |
| H | -2.444415 | -0.60612  | -2.665661 |
| H | -1.885072 | -2.07223  | -3.46289  |

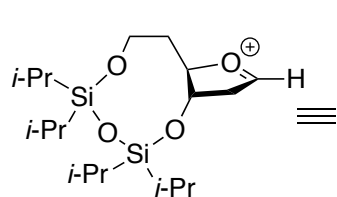**50-axial** $E_{\text{rel}} = 0 \text{ kcal/mol}$ 

Energy = -1588.13364 a.u.

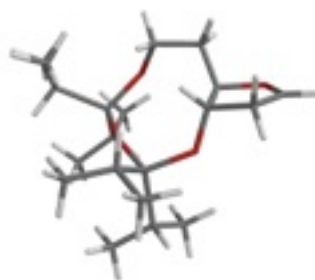

Cartesian Coordinates (Angstroms)

| ATOM | X         | Y        | Z         |
|------|-----------|----------|-----------|
| C    | -2.255818 | 1.134369 | -0.450881 |
| H    | -1.868952 | 1.002229 | -1.464217 |
| C    | -3.732259 | 1.580961 | -0.4854   |

|    |           |           |           |
|----|-----------|-----------|-----------|
| H  | -4.43943  | 0.794504  | -0.198671 |
| H  | -4.061677 | 1.941857  | -1.47295  |
| C  | -1.530235 | 2.302611  | 0.257063  |
| H  | -0.982595 | 1.963701  | 1.134289  |
| C  | -3.781357 | 2.712389  | 0.439697  |
| H  | -4.663129 | 3.244331  | 0.796954  |
| O  | -2.659952 | 3.123216  | 0.851895  |
| C  | -0.695623 | 3.242387  | -0.596701 |
| H  | -1.2858   | 3.633232  | -1.43363  |
| H  | -0.377965 | 4.090465  | 0.017173  |
| C  | 0.532891  | 2.528204  | -1.167662 |
| H  | 1.158558  | 3.263596  | -1.684064 |
| H  | 0.232036  | 1.78008   | -1.909654 |
| O  | 1.297762  | 1.93172   | -0.115162 |
| O  | -2.134913 | -0.05656  | 0.309324  |
| Si | 1.805192  | 0.345654  | -0.026409 |
| Si | -1.033464 | -1.299454 | 0.038555  |
| O  | 0.478358  | -0.650335 | -0.162279 |
| C  | 2.553195  | 0.170299  | 1.71248   |
| H  | 1.677284  | 0.031912  | 2.36586   |
| C  | 2.999242  | -0.10903  | -1.438018 |
| H  | 3.269322  | -1.160171 | -1.248697 |
| C  | -1.202843 | -2.368973 | 1.598687  |
| H  | -2.195603 | -2.836624 | 1.501044  |
| C  | -1.507854 | -2.168327 | -1.585734 |
| H  | -1.528432 | -1.364455 | -2.340069 |
| C  | 3.432079  | -1.087278 | 1.860661  |
| H  | 4.350917  | -1.017185 | 1.265529  |
| H  | 2.914533  | -2.002583 | 1.550444  |
| H  | 3.74068   | -1.231849 | 2.904672  |
| C  | 3.286029  | 1.428744  | 2.215469  |
| H  | 4.184514  | 1.652433  | 1.627223  |
| H  | 3.611488  | 1.300883  | 3.257349  |
| H  | 2.643835  | 2.313226  | 2.173619  |
| C  | 4.294114  | 0.725027  | -1.396558 |
| H  | 4.983101  | 0.423315  | -2.197277 |
| H  | 4.836283  | 0.619762  | -0.450362 |
| H  | 4.090365  | 1.793937  | -1.535609 |
| C  | 2.366754  | -0.04314  | -2.841495 |
| H  | 3.046125  | -0.458178 | -3.598899 |
| H  | 2.160964  | 0.991194  | -3.140027 |
| H  | 1.429721  | -0.606455 | -2.902418 |
| C  | -2.92132  | -2.781194 | -1.531142 |

|   |           |           |           |
|---|-----------|-----------|-----------|
| H | -3.224395 | -3.163854 | -2.514932 |
| H | -3.678347 | -2.055049 | -1.216861 |
| H | -2.971262 | -3.625561 | -0.831737 |
| C | -0.476397 | -3.203861 | -2.074672 |
| H | -0.723289 | -3.557373 | -3.084801 |
| H | -0.4525   | -4.09026  | -1.429047 |
| H | 0.539701  | -2.797935 | -2.108408 |
| C | -1.220294 | -1.535325 | 2.894363  |
| H | -0.253425 | -1.049639 | 3.078719  |
| H | -1.429015 | -2.169428 | 3.767038  |
| H | -1.983989 | -0.753118 | 2.863486  |
| C | -0.166299 | -3.504047 | 1.686063  |
| H | 0.856995  | -3.116485 | 1.75254   |
| H | -0.203694 | -4.177831 | 0.823601  |
| H | -0.333993 | -4.118786 | 2.580643  |

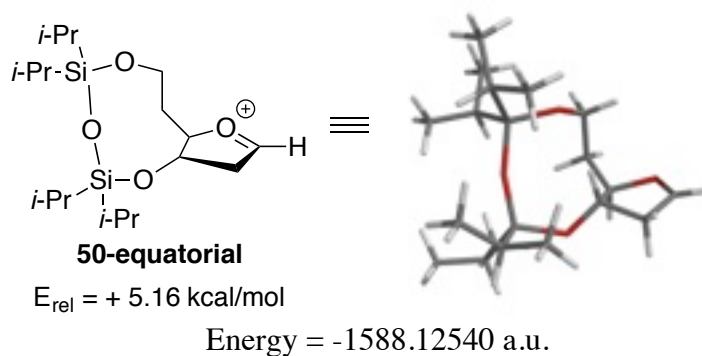

## Cartesian Coordinates (Angstroms)

| ATOM | X         | Y        | Z         |
|------|-----------|----------|-----------|
| C    | -2.190252 | 0.866384 | -0.184157 |
| H    | -1.358161 | 1.052729 | -0.866964 |
| C    | -3.512001 | 1.273715 | -0.870813 |
| H    | -4.373387 | 0.754142 | -0.414755 |
| H    | -3.576236 | 1.107629 | -1.949605 |
| C    | -2.117021 | 1.856038 | 0.99939   |
| H    | -2.766524 | 1.505659 | 1.806094  |
| C    | -3.618305 | 2.690702 | -0.512807 |
| H    | -4.257573 | 3.451632 | -0.961541 |
| O    | -2.875411 | 3.058759 | 0.444646  |
| C    | -0.787888 | 2.320855 | 1.55653   |
| H    | -0.988926 | 3.085881 | 2.315528  |
| H    | -0.366495 | 1.466455 | 2.099539  |
| C    | 0.244543  | 2.891828 | 0.579905  |

|    |           |           |           |
|----|-----------|-----------|-----------|
| H  | 1.057447  | 3.331397  | 1.167789  |
| H  | -0.193062 | 3.705486  | -0.007935 |
| O  | 0.77608   | 1.959618  | -0.36283  |
| O  | -2.194092 | -0.460178 | 0.287714  |
| Si | 1.593603  | 0.520111  | -0.197763 |
| Si | -0.923598 | -1.559579 | 0.177392  |
| O  | 0.474991  | -0.695612 | 0.022097  |
| C  | 2.714244  | 0.498766  | 1.340051  |
| H  | 2.008489  | 0.52302   | 2.186627  |
| C  | 2.434747  | 0.230963  | -1.875998 |
| H  | 2.674931  | -0.842906 | -1.902343 |
| C  | -0.990968 | -2.538047 | 1.802411  |
| H  | -2.012526 | -2.950047 | 1.831143  |
| C  | -1.199423 | -2.693746 | -1.331544 |
| H  | -1.80174  | -3.533931 | -0.950073 |
| C  | 3.504271  | -0.820536 | 1.459539  |
| H  | 4.24879   | -0.925094 | 0.659892  |
| H  | 2.853706  | -1.700619 | 1.416972  |
| H  | 4.052295  | -0.866522 | 2.410327  |
| C  | 3.652986  | 1.710838  | 1.498784  |
| H  | 4.428181  | 1.738303  | 0.724634  |
| H  | 4.171621  | 1.674386  | 2.466474  |
| H  | 3.122764  | 2.66748   | 1.454801  |
| C  | 3.750172  | 1.009176  | -2.074339 |
| H  | 4.165463  | 0.817007  | -3.073086 |
| H  | 4.522125  | 0.728321  | -1.349413 |
| H  | 3.599132  | 2.092682  | -1.996701 |
| C  | 1.469149  | 0.525892  | -3.041244 |
| H  | 1.935221  | 0.292409  | -4.00859  |
| H  | 1.184711  | 1.583537  | -3.058542 |
| H  | 0.550029  | -0.066318 | -2.977019 |
| C  | 0.110587  | -3.282045 | -1.891503 |
| H  | -0.097669 | -4.015758 | -2.682146 |
| H  | 0.709302  | -3.791723 | -1.128863 |
| H  | 0.743683  | -2.503884 | -2.332133 |
| C  | -2.017073 | -2.02252  | -2.452864 |
| H  | -2.150343 | -2.702551 | -3.305397 |
| H  | -1.516216 | -1.126716 | -2.840821 |
| H  | -3.01587  | -1.733975 | -2.110394 |
| C  | -0.818833 | -1.647788 | 3.046257  |
| H  | 0.171125  | -1.176115 | 3.07294   |
| H  | -0.919489 | -2.233784 | 3.970172  |
| H  | -1.574824 | -0.856831 | 3.083848  |

|   |           |           |          |
|---|-----------|-----------|----------|
| C | -0.017408 | -3.731146 | 1.828497 |
| H | 1.029933  | -3.407806 | 1.784081 |
| H | -0.184315 | -4.42168  | 0.994905 |
| H | -0.131605 | -4.312232 | 2.753746 |

#### IV. References

- (1) Pangborn, A. B.; Giardello, M. A.; Grubbs, R. H.; Rosen, R. K.; Timmers, F. J. *Organometallics* **1996**, *15*, 1518–1520.

## V. <sup>1</sup>H and <sup>13</sup>C NMR Spectra

Note: There are no peaks beyond the window provided.

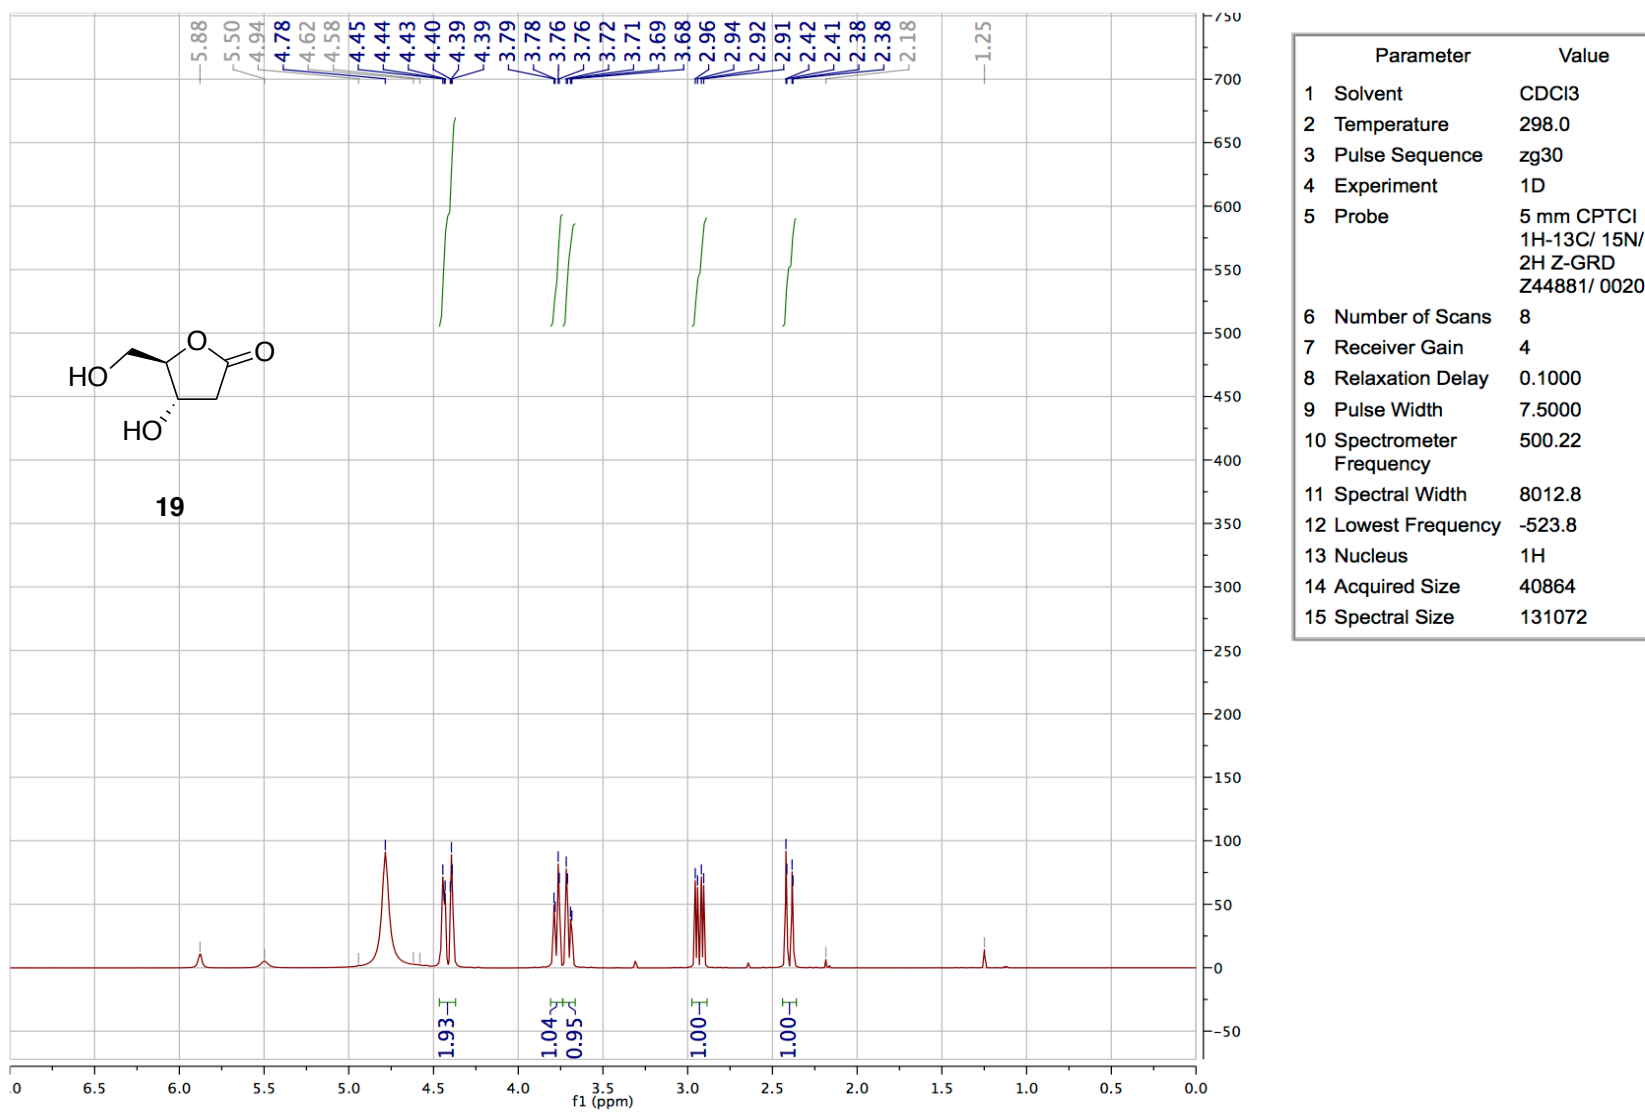

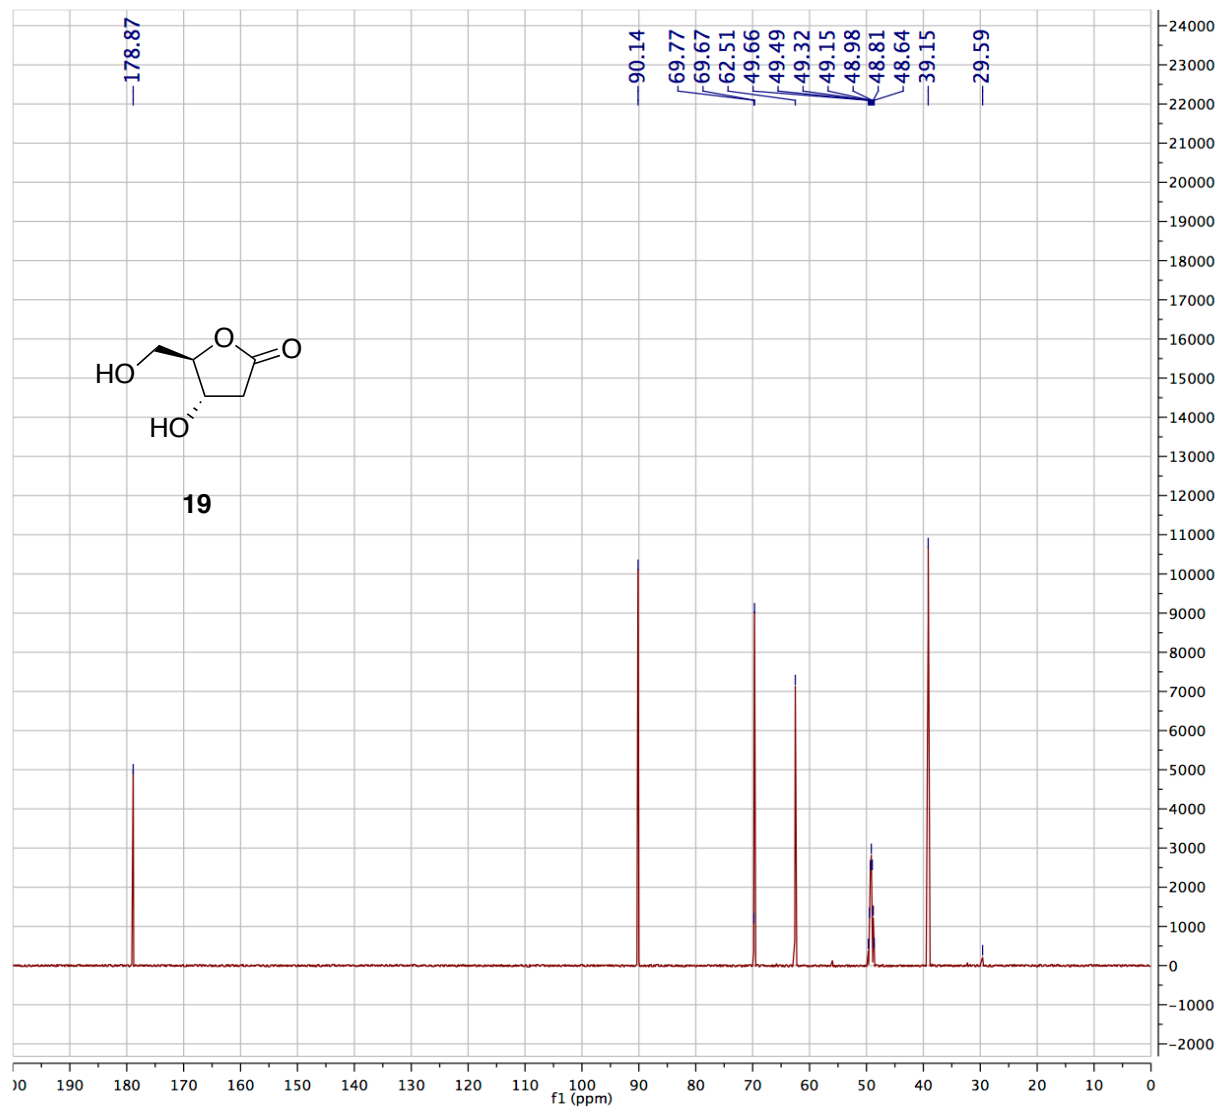

| Parameter                 | Value                                               |
|---------------------------|-----------------------------------------------------|
| 1 Solvent                 | CDCl3                                               |
| 2 Temperature             | 298.0                                               |
| 3 Pulse Sequence          | SpinEchopg30gp.prd                                  |
| 4 Experiment              | 1D                                                  |
| 5 Probe                   | 5 mm CPTCI 1H-13C/<br>15N/ 2H Z-GRD<br>Z44881/ 0020 |
| 6 Number of Scans         | 84                                                  |
| 7 Receiver Gain           | 7298                                                |
| 8 Relaxation Delay        | 0.2500                                              |
| 9 Pulse Width             | 14.8500                                             |
| 10 Spectrometer Frequency | 125.79                                              |
| 11 Spectral Width         | 30303.0                                             |
| 12 Lowest Frequency       | -1147.8                                             |
| 13 Nucleus                | 13C                                                 |
| 14 Acquired Size          | 32768                                               |
| 15 Spectral Size          | 65536                                               |



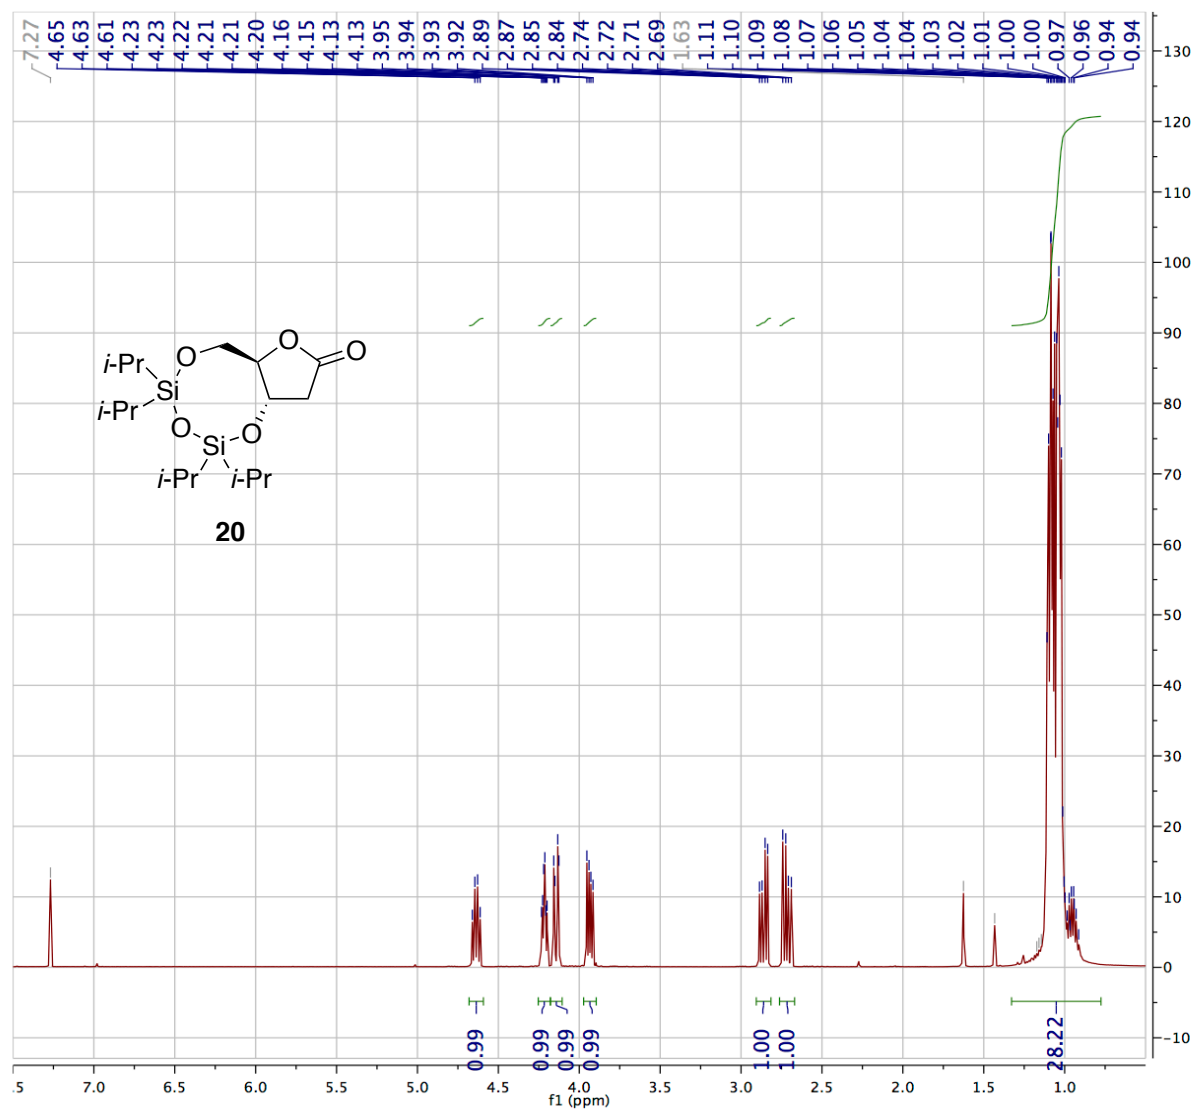

| Parameter                    | Value                                                  |
|------------------------------|--------------------------------------------------------|
| 1 Solvent                    | CD3OD                                                  |
| 2 Temperature                | 298.0                                                  |
| 3 Pulse Sequence             | zg30                                                   |
| 4 Experiment                 | 1D                                                     |
| 5 Probe                      | 5 mm CPTCI<br>1H-13C/ 15N/ 2H<br>Z-GRD Z44881/<br>0020 |
| 6 Number of Scans            | 8                                                      |
| 7 Receiver Gain              | 4                                                      |
| 8 Relaxation Delay           | 0.1000                                                 |
| 9 Pulse Width                | 7.5000                                                 |
| 10 Spectrometer<br>Frequency | 500.22                                                 |
| 11 Spectral Width            | 8012.8                                                 |
| 12 Lowest Frequency          | -532.1                                                 |
| 13 Nucleus                   | 1H                                                     |
| 14 Acquired Size             | 40864                                                  |
| 15 Spectral Size             | 131072                                                 |

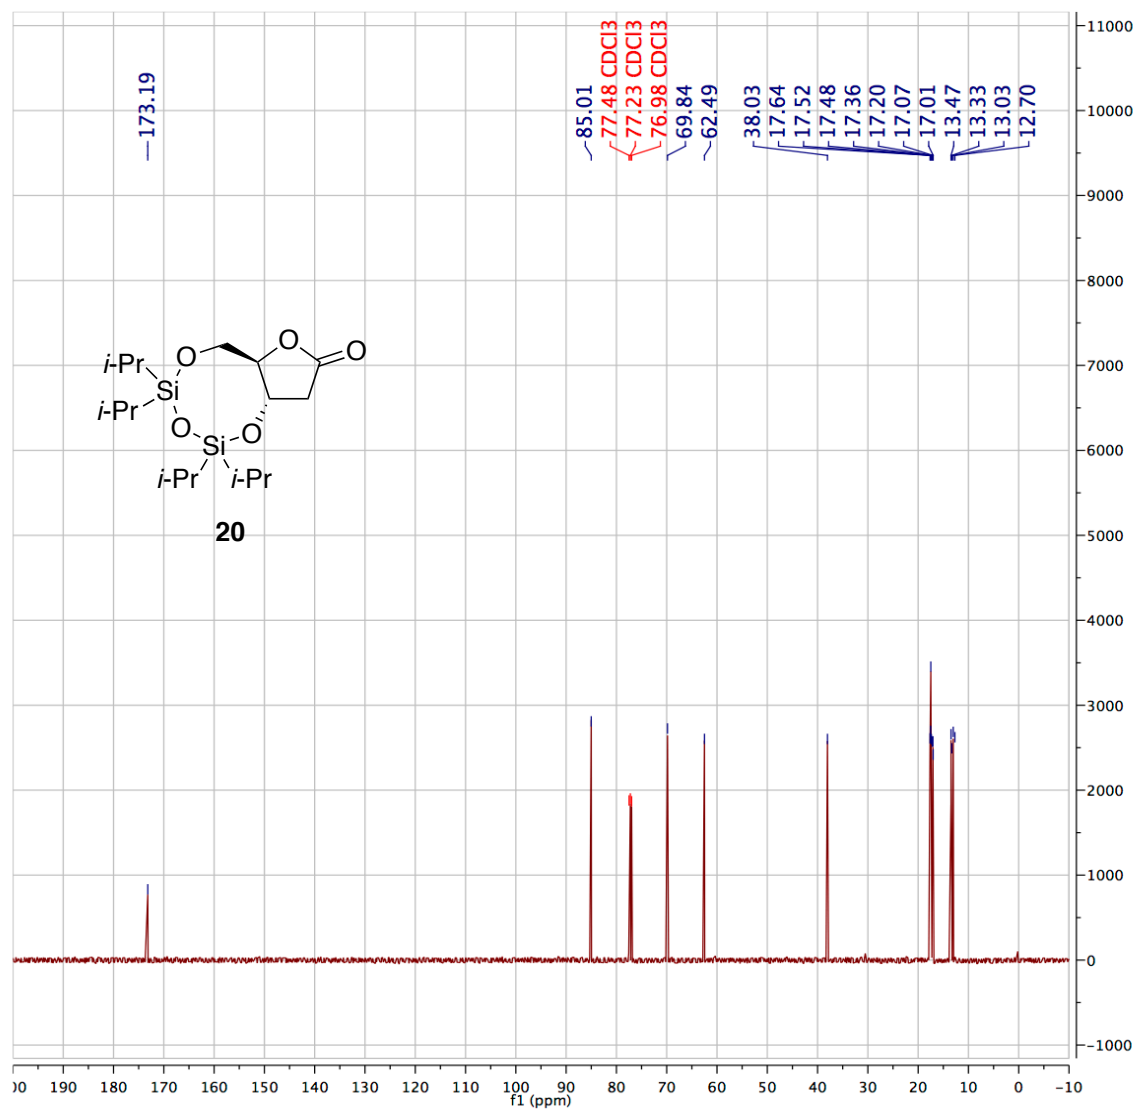

| Parameter                    | Value                                               |
|------------------------------|-----------------------------------------------------|
| 1 Solvent                    | CDCI3                                               |
| 2 Temperature                | 298.0                                               |
| 3 Pulse Sequence             | SpinEchopg30gp.prd                                  |
| 4 Experiment                 | 1D                                                  |
| 5 Probe                      | 5 mm CPTCI 1H-13C/<br>15N/ 2H Z-GRD Z44881/<br>0020 |
| 6 Number of Scans            | 112                                                 |
| 7 Receiver Gain              | 7298                                                |
| 8 Relaxation Delay           | 0.2500                                              |
| 9 Pulse Width                | 15.5000                                             |
| 10 Spectrometer<br>Frequency | 125.79                                              |
| 11 Spectral Width            | 30303.0                                             |
| 12 Lowest<br>Frequency       | -1295.7                                             |
| 13 Nucleus                   | 13C                                                 |
| 14 Acquired Size             | 32768                                               |
| 15 Spectral Size             | 65536                                               |

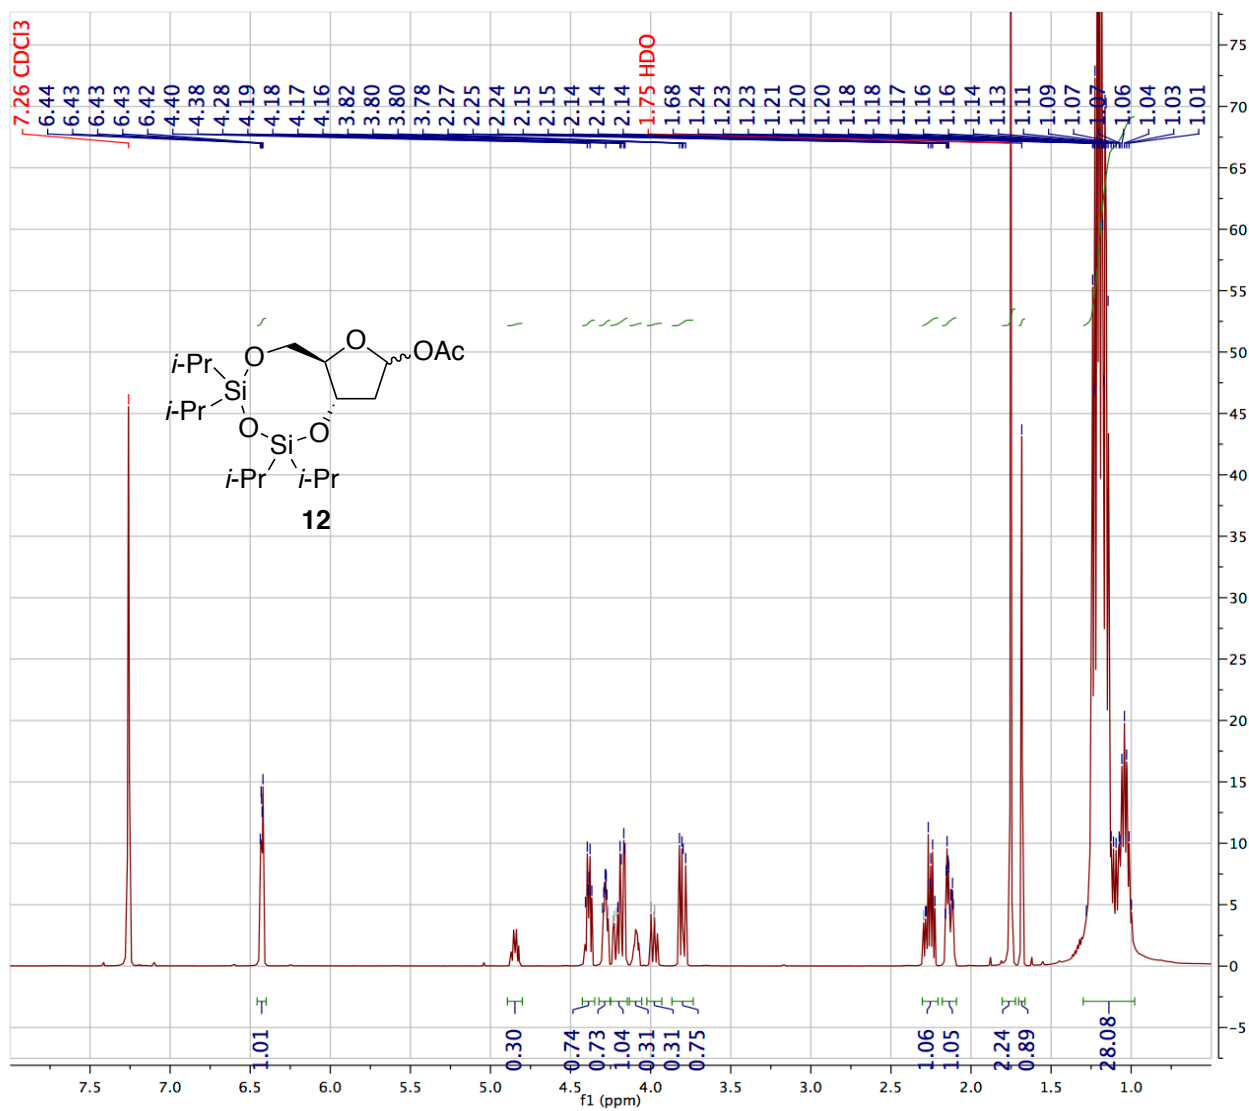

| Parameter                    | Value                                                  |
|------------------------------|--------------------------------------------------------|
| 1 Solvent                    | CDCl <sub>3</sub>                                      |
| 2 Temperature                | 298.0                                                  |
| 3 Pulse Sequence             | zg30                                                   |
| 4 Experiment                 | 1D                                                     |
| 5 Probe                      | 5 mm CPTCI<br>1H-13C/ 15N/<br>2H Z-GRD<br>Z44881/ 0020 |
| 6 Number of Scans            | 8                                                      |
| 7 Receiver Gain              | 2                                                      |
| 8 Relaxation Delay           | 0.1000                                                 |
| 9 Pulse Width                | 7.5000                                                 |
| 10 Spectrometer<br>Frequency | 500.22                                                 |
| 11 Spectral Width            | 8012.8                                                 |
| 12 Lowest Frequency          | -455.0                                                 |
| 13 Nucleus                   | 1H                                                     |
| 14 Acquired Size             | 40864                                                  |
| 15 Spectral Size             | 131072                                                 |

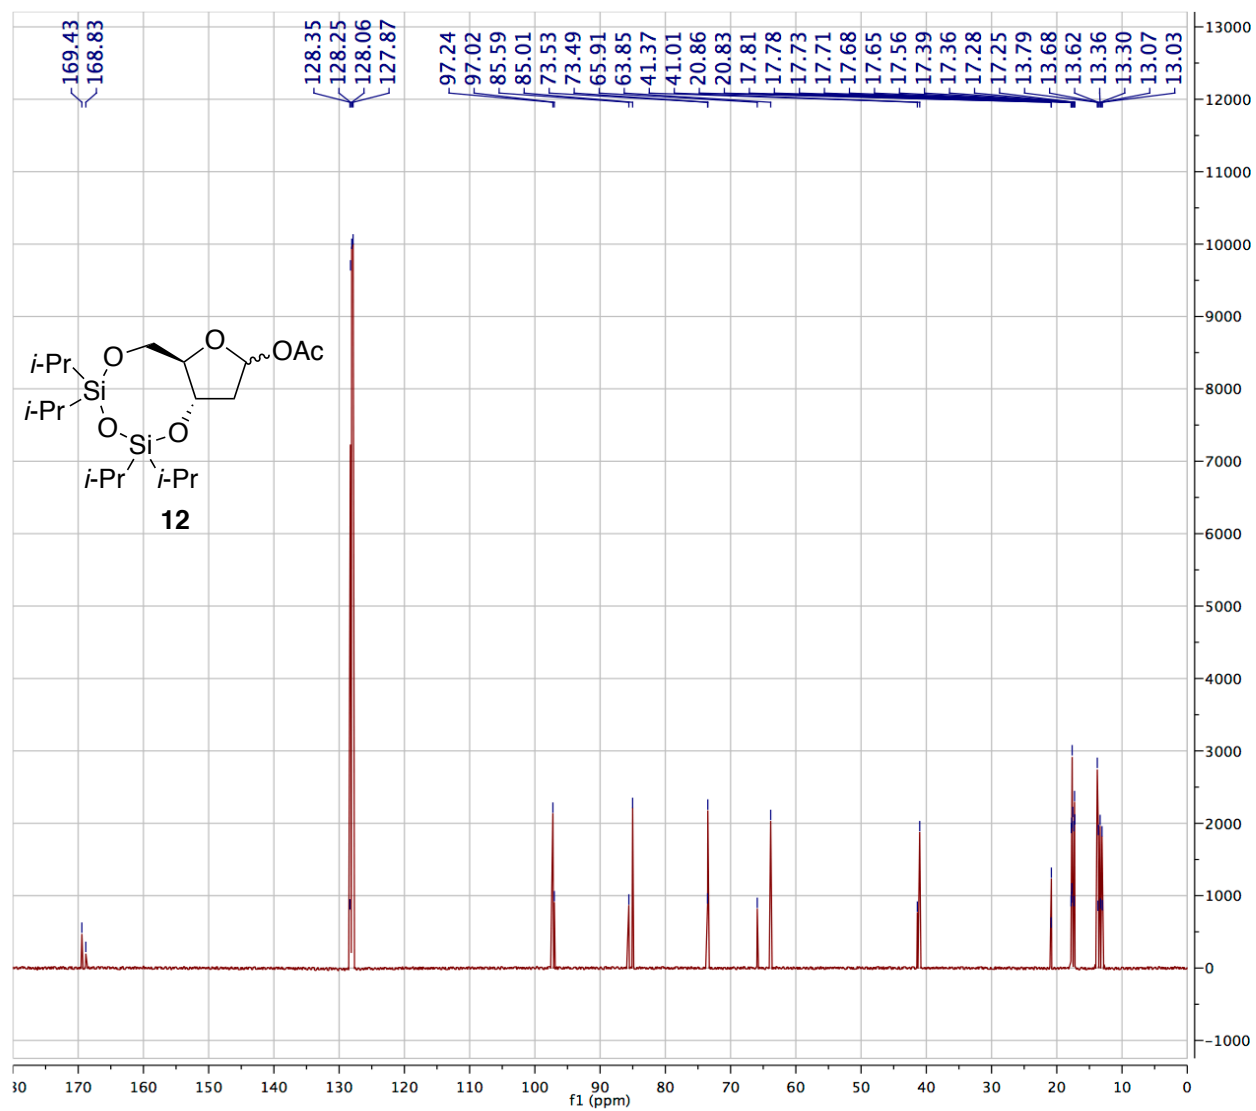

| Parameter                 | Value                                                  |
|---------------------------|--------------------------------------------------------|
| 1 Solvent                 | CDCl3                                                  |
| 2 Temperature             | 298.0                                                  |
| 3 Pulse Sequence          | SpinEchopg30g<br>p.prd                                 |
| 4 Experiment              | 1D                                                     |
| 5 Probe                   | 5 mm CPTCI<br>1H-13C/ 15N/<br>2H Z-GRD<br>Z44881/ 0020 |
| 6 Number of Scans         | 122                                                    |
| 7 Receiver Gain           | 4598                                                   |
| 8 Relaxation Delay        | 0.2500                                                 |
| 9 Pulse Width             | 15.5000                                                |
| 10 Spectrometer Frequency | 125.79                                                 |
| 11 Spectral Width         | 30303.0                                                |
| 12 Lowest Frequency       | -1267.2                                                |
| 13 Nucleus                | 13C                                                    |
| 14 Acquired Size          | 32768                                                  |
| 15 Spectral Size          | 65536                                                  |

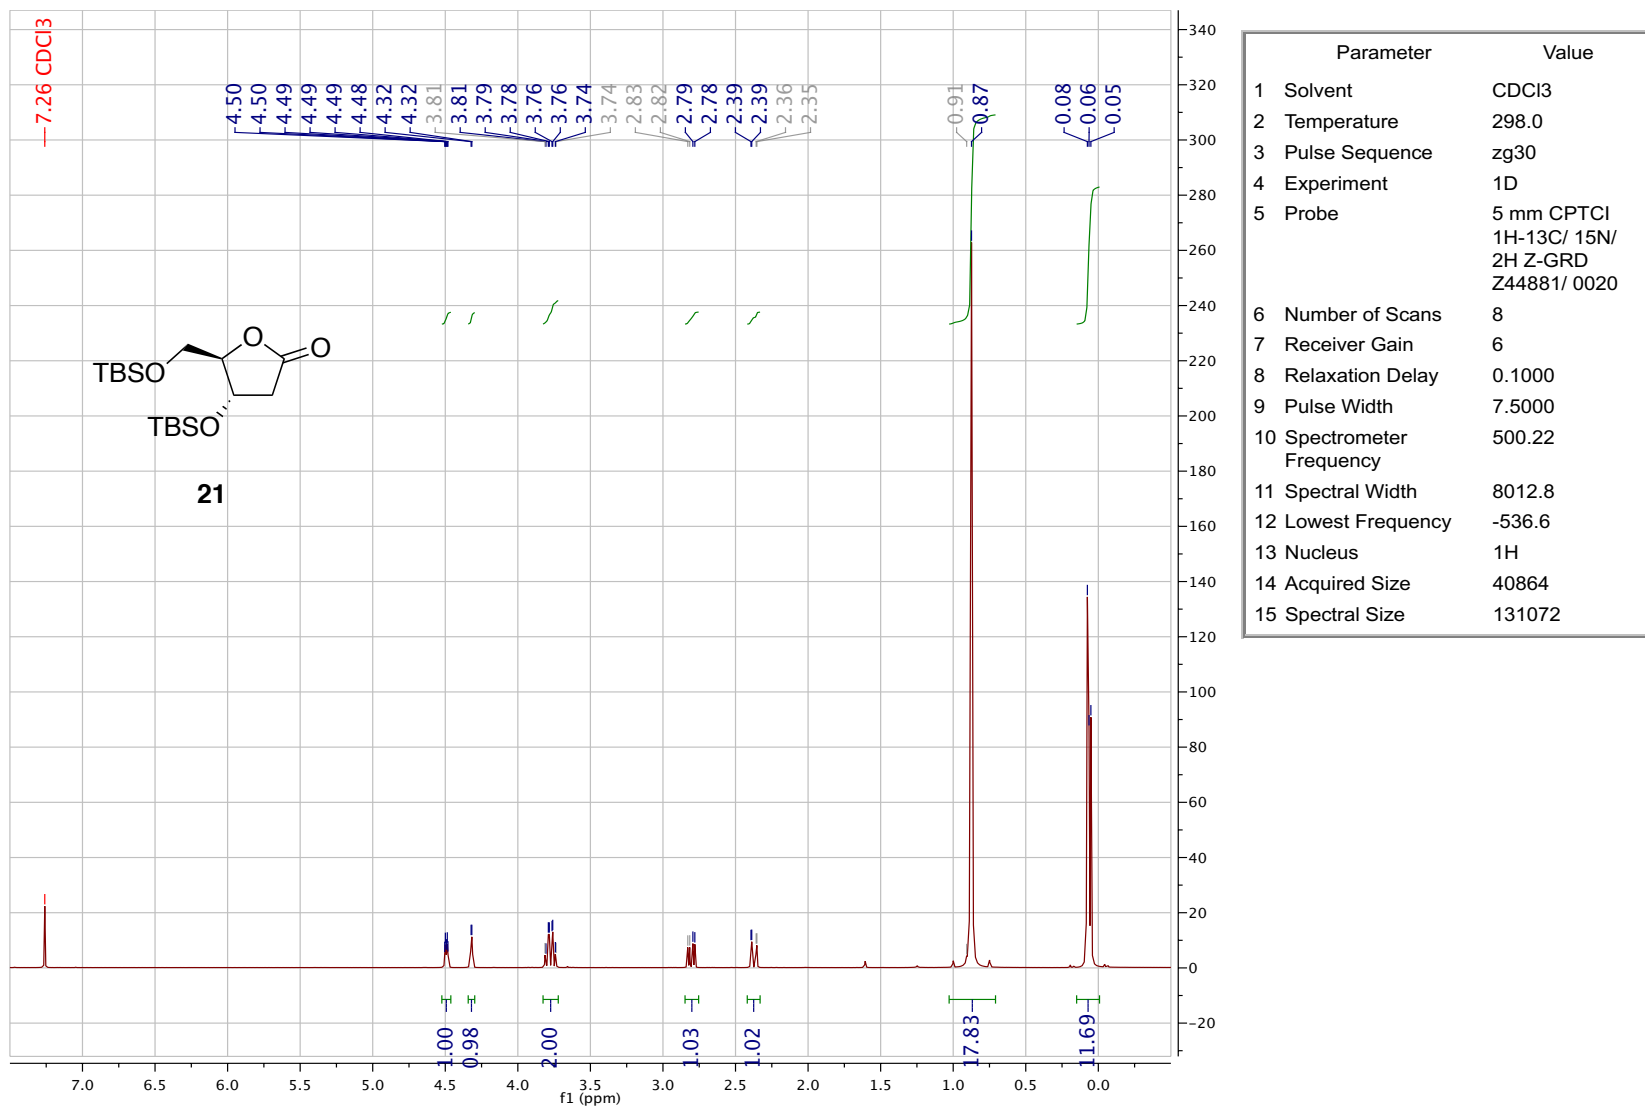

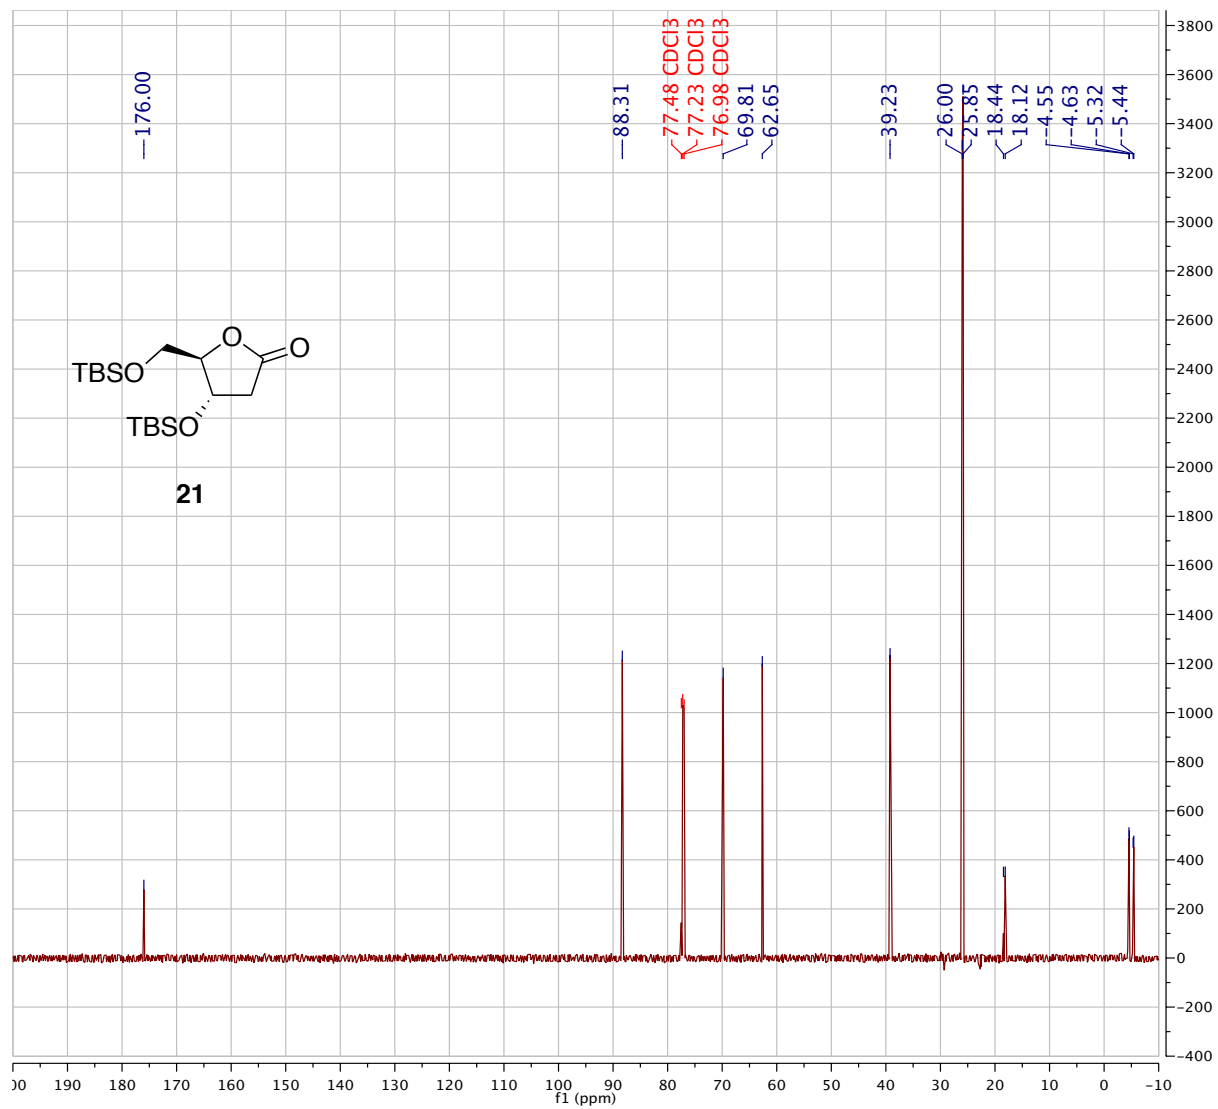

| Parameter                 | Value                                               |
|---------------------------|-----------------------------------------------------|
| 1 Solvent                 | CDCl3                                               |
| 2 Temperature             | 298.0                                               |
| 3 Pulse Sequence          | SpinEchopg30gp.prd                                  |
| 4 Experiment              | 1D                                                  |
| 5 Probe                   | 5 mm CPTCI 1H-13C/<br>15N/ 2H Z-GRD<br>Z44881/ 0020 |
| 6 Number of Scans         | 159                                                 |
| 7 Receiver Gain           | 3251                                                |
| 8 Relaxation Delay        | 0.2500                                              |
| 9 Pulse Width             | 15.5000                                             |
| 10 Spectrometer Frequency | 125.79                                              |
| 11 Spectral Width         | 30303.0                                             |
| 12 Lowest Frequency       | -1295.2                                             |
| 13 Nucleus                | 13C                                                 |
| 14 Acquired Size          | 32768                                               |
| 15 Spectral Size          | 65536                                               |

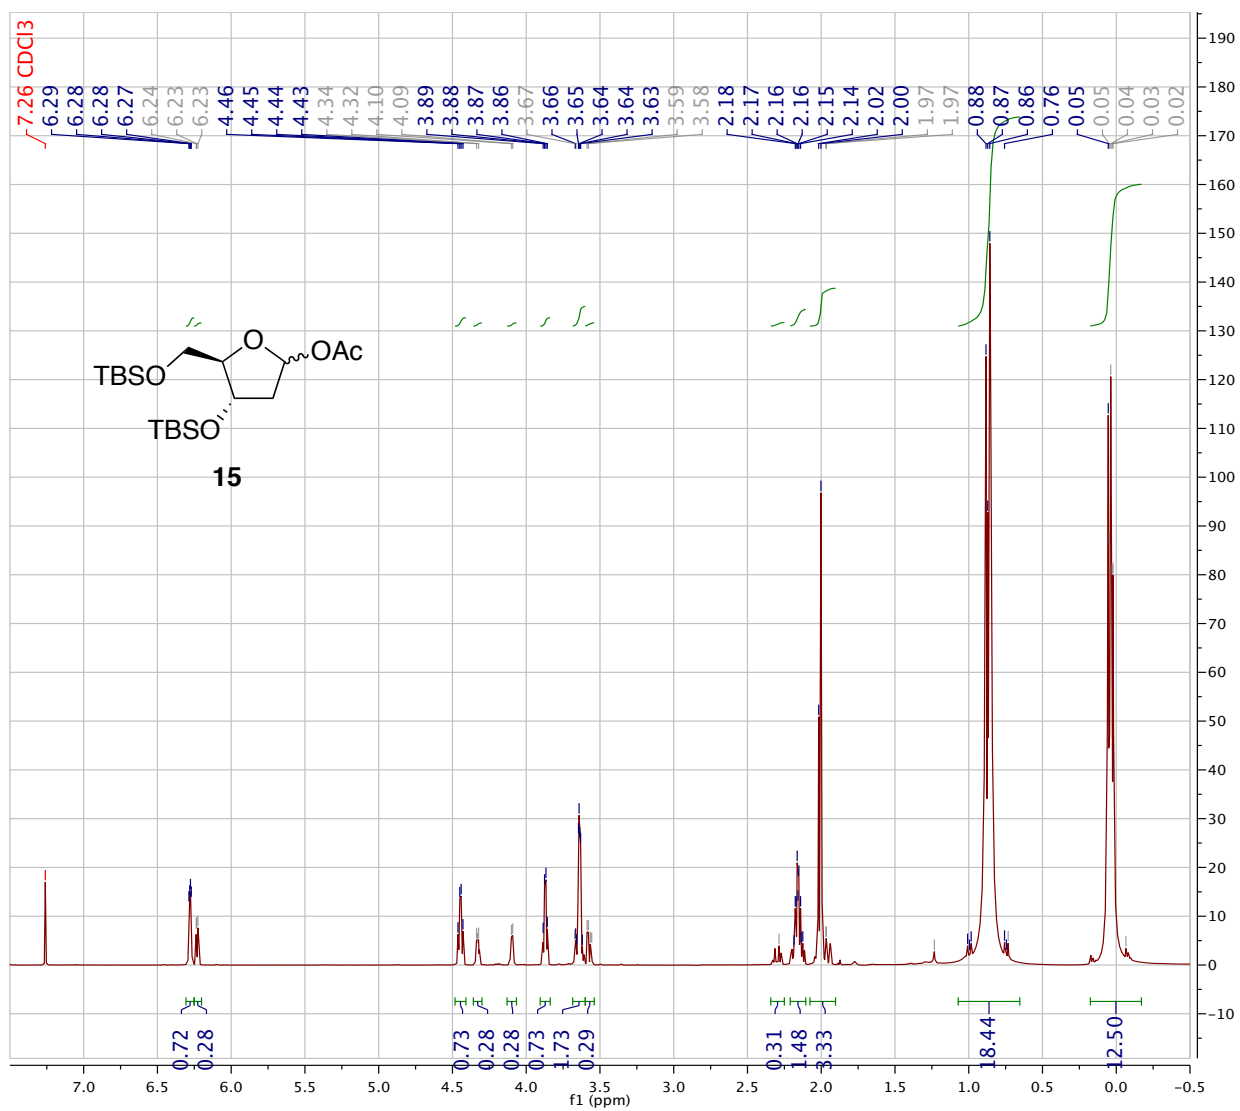

| Parameter                    | Value                                                  |
|------------------------------|--------------------------------------------------------|
| 1 Solvent                    | CDCl <sub>3</sub>                                      |
| 2 Temperature                | 298.0                                                  |
| 3 Pulse Sequence             | zg30                                                   |
| 4 Experiment                 | 1D                                                     |
| 5 Probe                      | 5 mm CPTCI<br>1H-13C/ 15N/<br>2H Z-GRD<br>Z44881/ 0020 |
| 6 Number of Scans            | 8                                                      |
| 7 Receiver Gain              | 2                                                      |
| 8 Relaxation Delay           | 0.1000                                                 |
| 9 Pulse Width                | 7.5000                                                 |
| 10 Spectrometer<br>Frequency | 500.22                                                 |
| 11 Spectral Width            | 8012.8                                                 |
| 12 Lowest Frequency          | -536.2                                                 |
| 13 Nucleus                   | 1H                                                     |
| 14 Acquired Size             | 40864                                                  |
| 15 Spectral Size             | 131072                                                 |

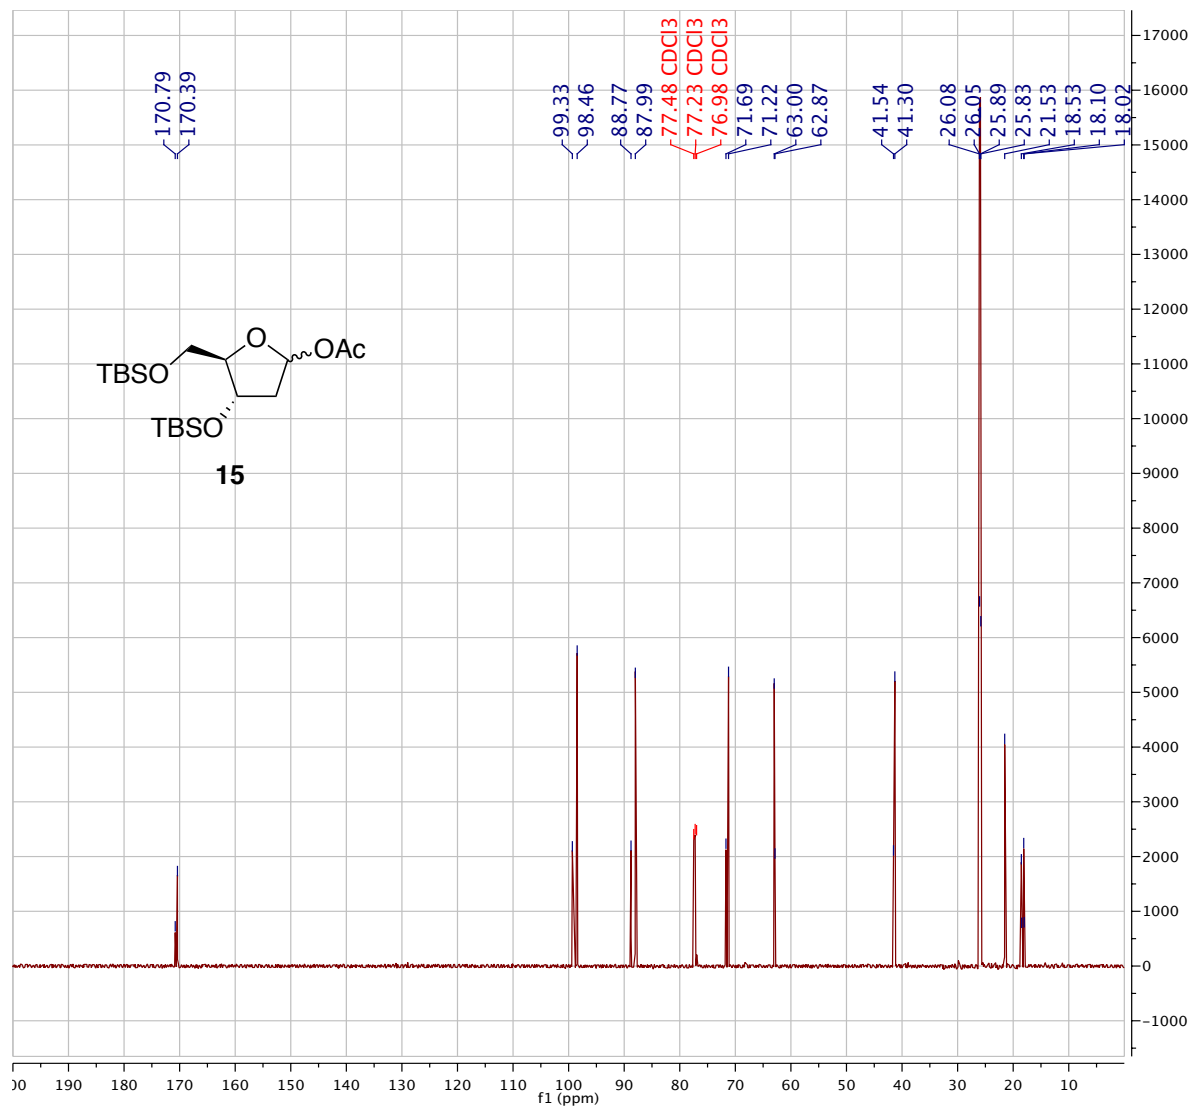

| Parameter                 | Value                                               |
|---------------------------|-----------------------------------------------------|
| 1 Solvent                 | CDCl <sub>3</sub>                                   |
| 2 Temperature             | 298.0                                               |
| 3 Pulse Sequence          | SpinEchopg30gp.prd                                  |
| 4 Experiment              | 1D                                                  |
| 5 Probe                   | 5 mm CPTCI 1H-13C/<br>15N/ 2H Z-GRD<br>Z44881/ 0020 |
| 6 Number of Scans         | 114                                                 |
| 7 Receiver Gain           | 7298                                                |
| 8 Relaxation Delay        | 0.2500                                              |
| 9 Pulse Width             | 15.5000                                             |
| 10 Spectrometer Frequency | 125.79                                              |
| 11 Spectral Width         | 30303.0                                             |
| 12 Lowest Frequency       | -1298.1                                             |
| 13 Nucleus                | 13C                                                 |
| 14 Acquired Size          | 32768                                               |
| 15 Spectral Size          | 65536                                               |



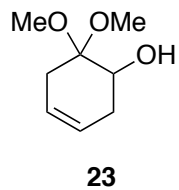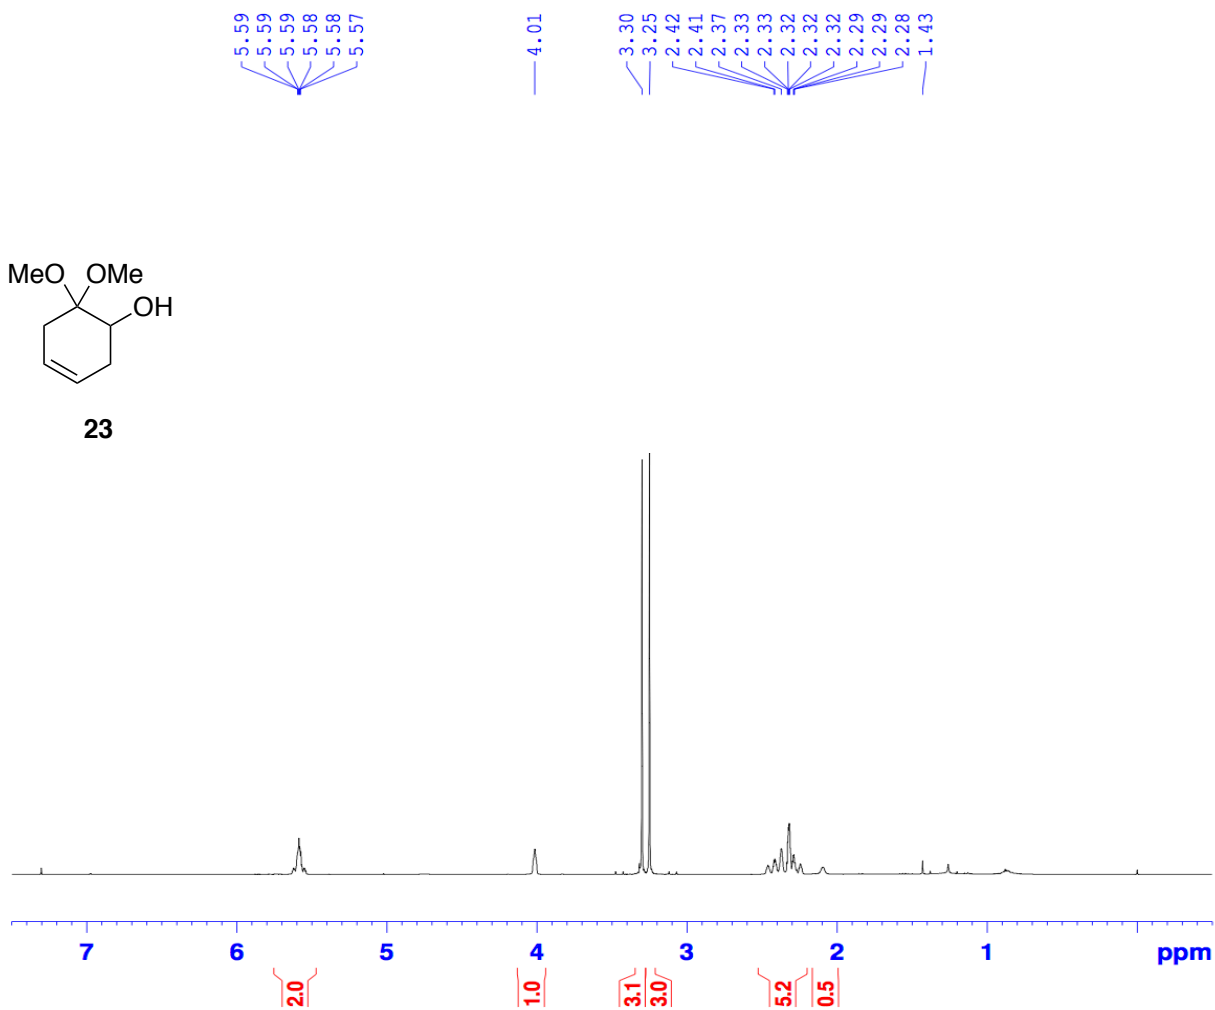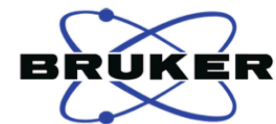

Current Data Parameters  
 NAME VIT-III-78-A  
 EXPNO 1  
 PROCNO 1

F2 - Acquisition Parameters  
 Date\_ 20120322  
 Time 0.15  
 INSTRUM spect  
 PROBHD 5 mm BBO BB-1H  
 PULPROG zg30  
 TD 65536  
 SOLVENT CDCl3  
 NS 16  
 DS 2  
 SWH 8278.146 Hz  
 FIDRES 0.126314 Hz  
 AQ 3.9584243 sec  
 RG 35.9  
 DW 60.400 usec  
 DE 6.50 usec  
 TE 298.1 K  
 D1 2.00000000 sec  
 TD0 1

===== CHANNEL f1 =====  
 NUC1 1H  
 P1 7.75 usec  
 PL1 -5.00 dB  
 PL1W 31.77312851 W  
 SFO1 400.1324710 MHz

F2 - Processing parameters  
 SI 32768  
 SF 400.1299929 MHz  
 WDW EM  
 SSB 0  
 LB 0.30 Hz  
 GB 0  
 PC 1.00

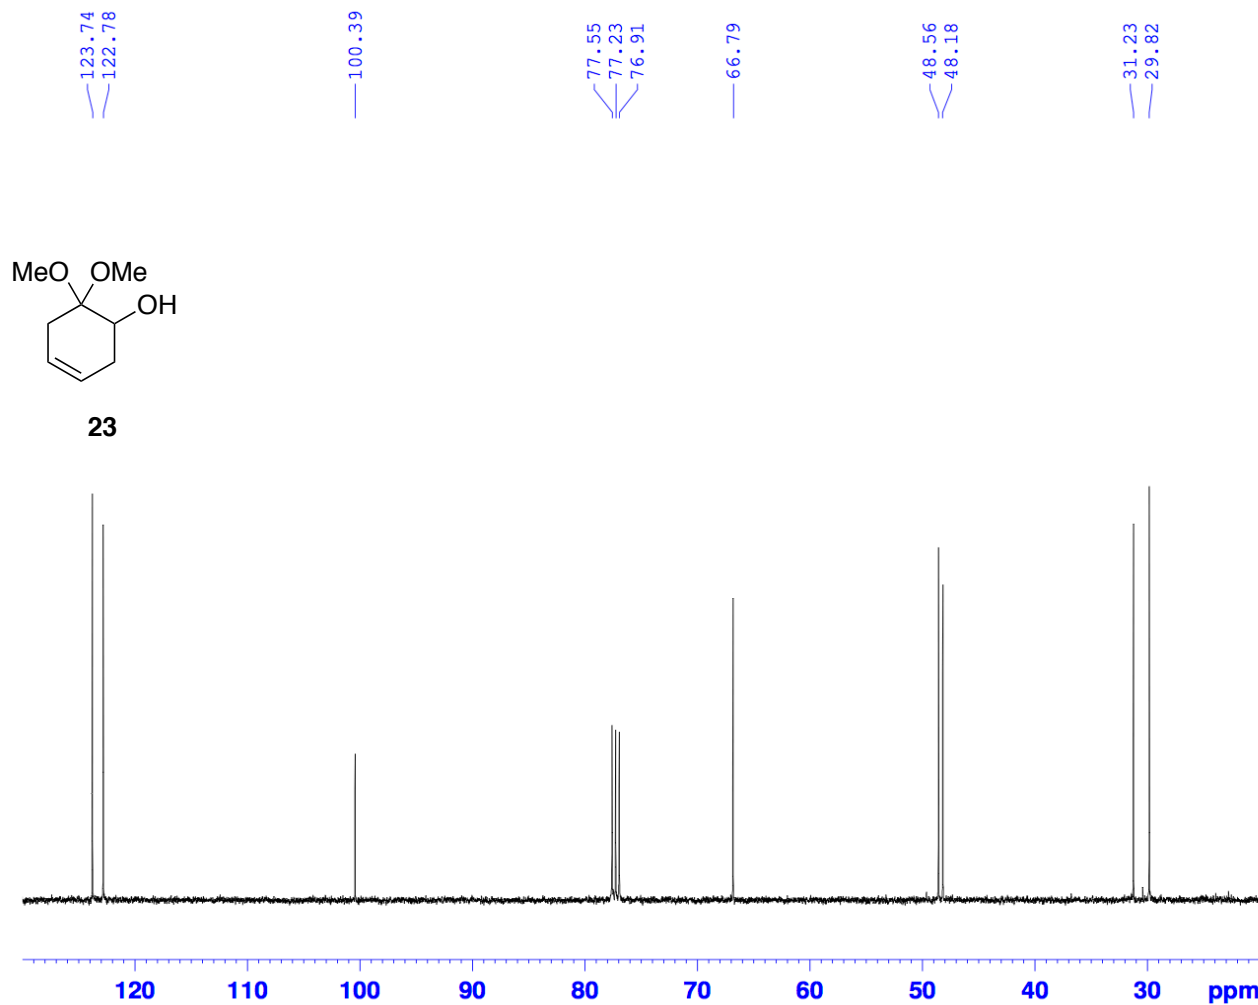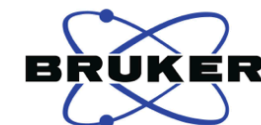

Current Data Parameters  
NAME VIT-III-78-A  
EXPNO 2  
PROCNO 1

F2 - Acquisition Parameters  
Date\_ 20120322  
Time 0.20  
INSTRUM spect  
PROBHD 5 mm BBO BB-1H  
PULPROG zgpg30  
TD 65536  
SOLVENT CDCl3  
NS 79  
DS 4  
SWH 23980.814 Hz  
FIDRES 0.365918 Hz  
AQ 1.3664756 sec  
RG 32768  
DW 20.850 usec  
DE 6.50 usec  
TE 298.7 K  
D1 2.00000000 sec  
D11 0.03000000 sec  
TD0 1

===== CHANNEL f1 =====  
NUC1 13C  
P1 6.60 usec  
PL1 -4.00 dB  
PL1W 25.23829460 W  
SFO1 100.6228298 MHz

===== CHANNEL f2 =====  
CPDPRG2 waltz16  
NUC2 1H  
PCPD2 70.00 usec  
PL2 -5.00 dB  
PL12 13.84 dB  
PL13 13.84 dB  
PL2W 31.77312851 W  
PL12W 0.41501135 W  
PL13W 0.41501135 W  
SFO2 400.1316005 MHz

F2 - Processing parameters  
SI 32768  
SF 100.6127555 MHz  
WDW EM  
SSB 0  
LB 1.00 Hz  
GB 0  
PC 1.40

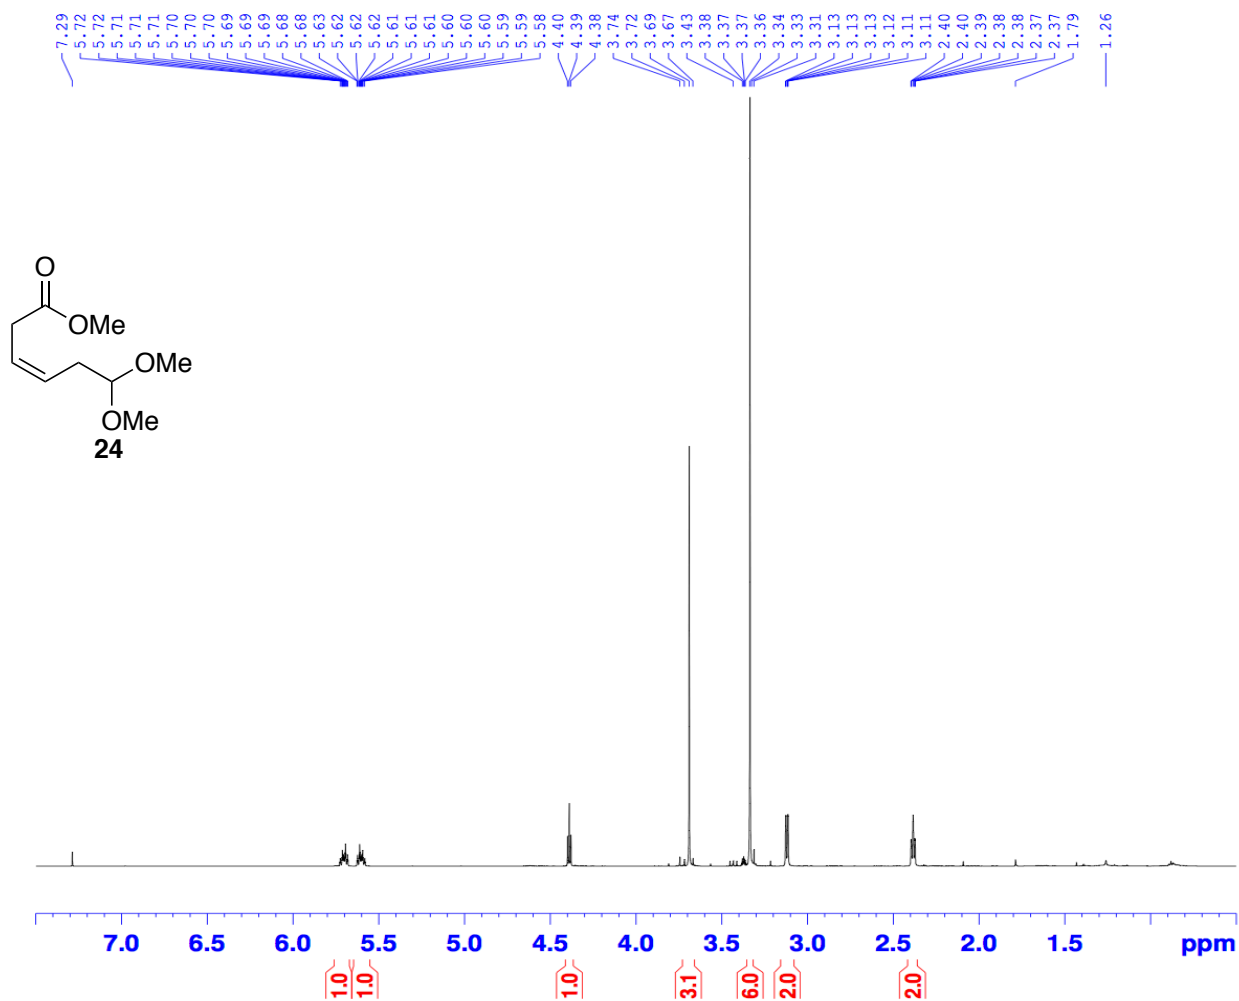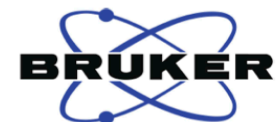

Current Data Parameters  
 NAME VIT-III-79-A  
 EXPNO 1  
 PROCNO 1

F2 - Acquisition Parameters  
 Date\_ 20120324  
 Time 21.49  
 INSTRUM spect  
 PROBHD 5 mm PAQXI 1H/  
 PULPROG zg30  
 TD 65536  
 SOLVENT CDCl3  
 NS 16  
 DS 0  
 SWH 12335.526 Hz  
 FIDRES 0.188225 Hz  
 AQ 2.6564426 sec  
 RG 33.59  
 DW 40.533 usec  
 DE 6.50 usec  
 TE 298.1 K  
 D1 1.00000000 sec  
 TD0 1

===== CHANNEL f1 =====  
 NUC1 1H  
 P1 9.79 usec  
 PLW1 9.30000019 W  
 SFO1 600.1937064 MHz

F2 - Processing parameters  
 SI 65536  
 SF 600.1899985 MHz  
 WDW EM  
 SSB 0  
 LB 0.30 Hz  
 GB 0  
 PC 1.00

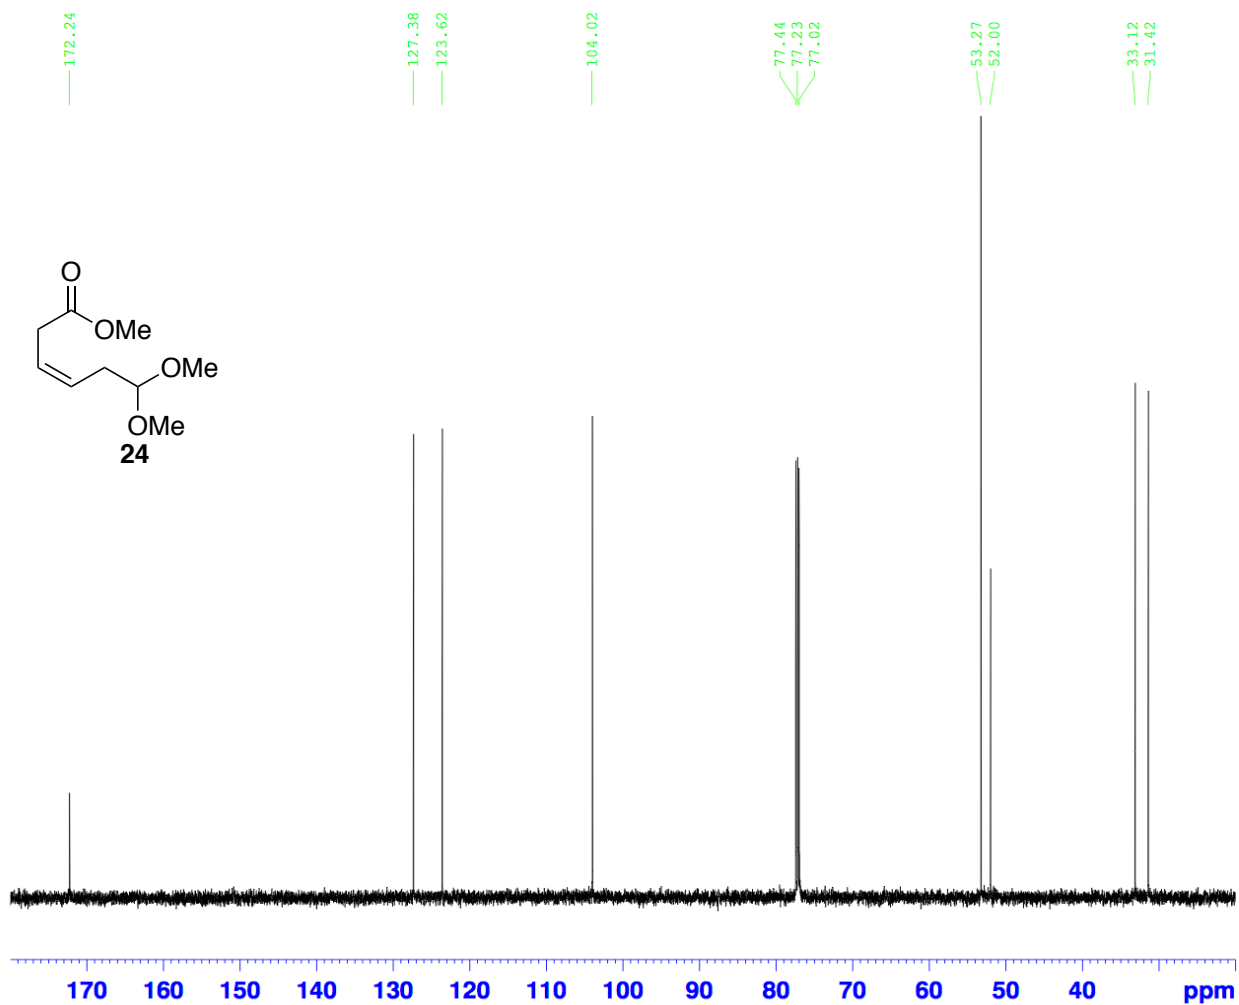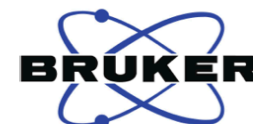

Current Data Parameters  
 NAME VIT-III-79-A  
 EXPNO 2  
 PROCNO 1

F2 - Acquisition Parameters  
 Date\_ 20120324  
 Time 21.54  
 INSTRUM spect  
 PROBHD 5 mm PAQXI 1H/  
 PULPROG zgpg30  
 TD 65536  
 SOLVENT CDCl3  
 NS 89  
 DS 0  
 SWH 36057.691 Hz  
 FIDRES 0.550197 Hz  
 AQ 0.9088159 sec  
 RG 184.65  
 DW 13.867 usec  
 DE 6.50 usec  
 TE 298.1 K  
 D1 2.00000000 sec  
 D11 0.03000000 sec  
 TDO 1

===== CHANNEL f1 =====  
 NUC1 13C  
 P1 15.00 usec  
 PLW1 106.00000000 W  
 SFO1 150.9329866 MHz

===== CHANNEL f2 =====  
 CPDPRG2 waltz16  
 NUC2 1H  
 PCPD2 70.00 usec  
 PLW2 9.30000019 W  
 PLW12 0.18190999 W  
 PLW13 0.08913500 W  
 SFO2 600.1924008 MHz

F2 - Processing parameters  
 SI 32768  
 SF 150.9178689 MHz  
 WDW EM  
 SSB 0  
 LB 1.00 Hz  
 GB 0  
 PC 1.40

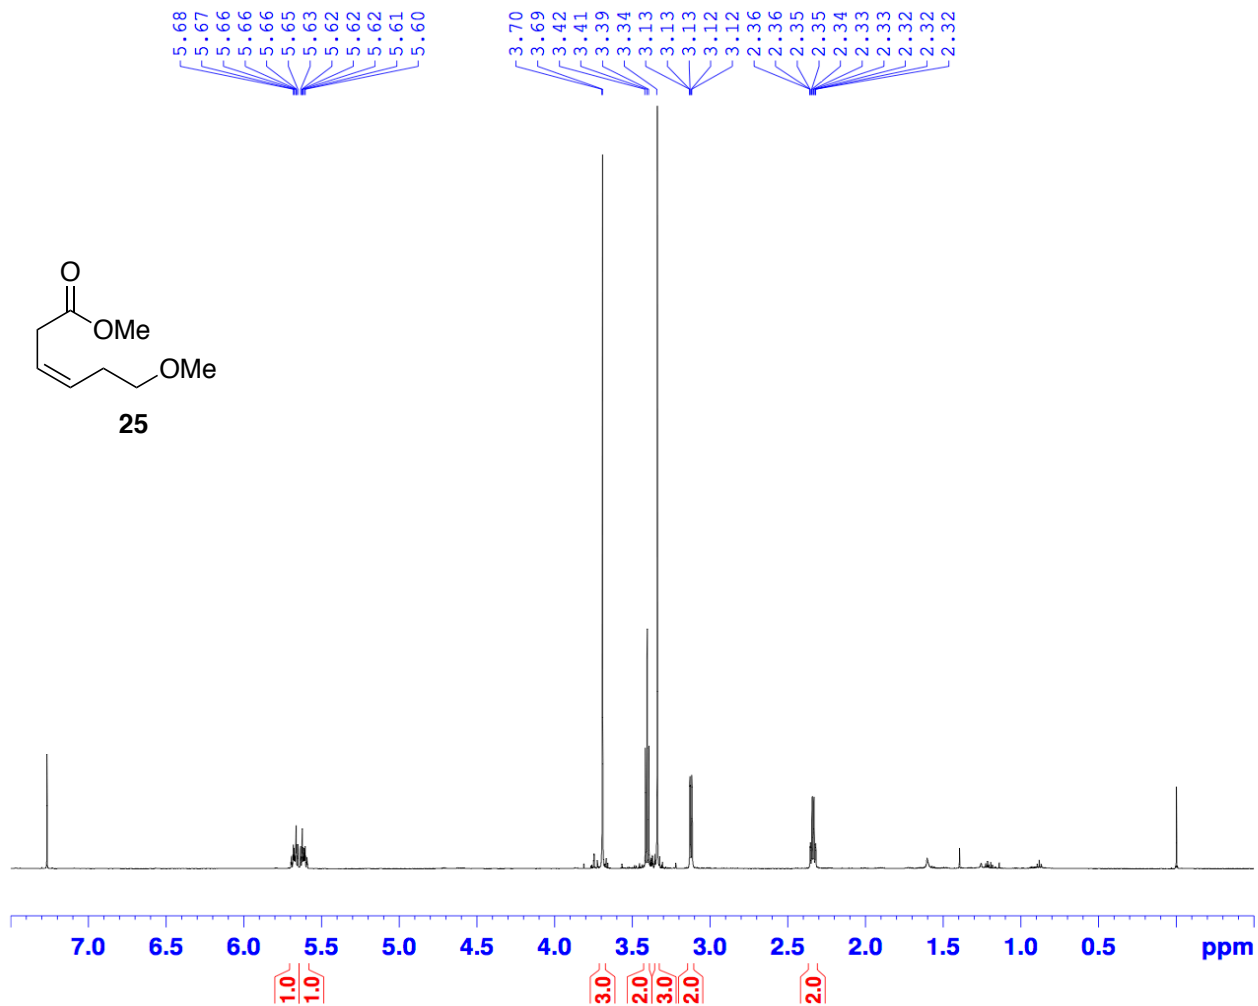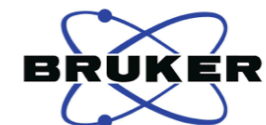

Current Data Parameters  
 NAME VTT-III-82-B  
 EXPNO 1  
 PROCNO 1

F2 - Acquisition Parameters  
 Date\_ 20120330  
 Time 23.48  
 INSTRUM spect  
 PROBHD 5 mm PAQXI 1H/  
 PULPROG zg30  
 TD 65536  
 SOLVENT CDC13  
 NS 16  
 DS 2  
 SWH 12335.526 Hz  
 FIDRES 0.188225 Hz  
 AQ 2.6564426 sec  
 RG 104.51  
 DW 40.533 usec  
 DE 6.50 usec  
 TE 298.1 K  
 D1 1.00000000 sec  
 TD0 1

===== CHANNEL f1 =====  
 NUC1 1H  
 P1 9.79 usec  
 PLW1 9.30000019 W  
 SFO1 600.1937064 MHz

F2 - Processing parameters  
 SI 65536  
 SF 600.1900111 MHz  
 WDW EM  
 SSB 0  
 LB 0.30 Hz  
 GB 0  
 PC 1.00

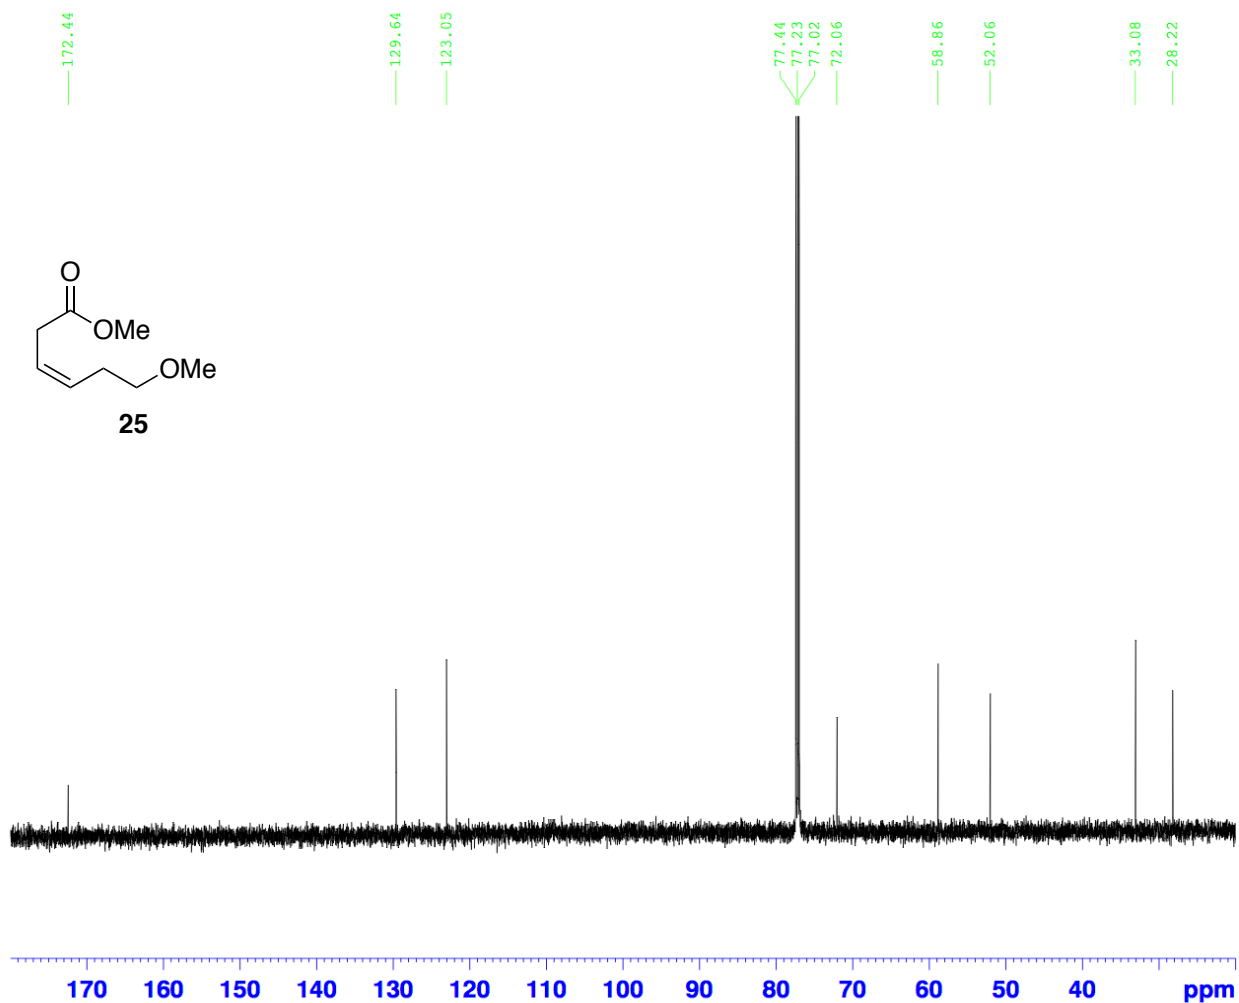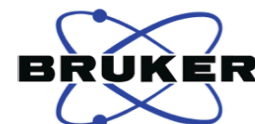

Current Data Parameters  
 NAME VIT-III-82-B  
 EXPNO 2  
 PROCNO 1

F2 - Acquisition Parameters  
 Date\_ 20120330  
 Time 23.50  
 INSTRUM spect  
 PROBHD 5 mm PAQXI 1H/  
 PULPROG zgpg30  
 TD 65536  
 SOLVENT CDC13  
 NS 128  
 DS 0  
 SWH 36057.691 Hz  
 FIDRES 0.550197 Hz  
 AQ 0.9088159 sec  
 RG 184.65  
 DW 13.867 usec  
 DE 6.50 usec  
 TE 298.1 K  
 D1 2.00000000 sec  
 D11 0.03000000 sec  
 TD0 1

===== CHANNEL f1 =====  
 NUC1 13C  
 P1 15.00 usec  
 PLW1 106.00000000 W  
 SFO1 150.9329866 MHz

===== CHANNEL f2 =====  
 CPDPRG2 waltz16  
 NUC2 1H  
 PCPD2 70.00 usec  
 PLW2 9.30000019 W  
 PLW12 0.18190999 W  
 PLW13 0.08913500 W  
 SFO2 600.1924008 MHz

F2 - Processing parameters  
 SI 32768  
 SF 150.9178644 MHz  
 WDW EM  
 SSB 0  
 LB 1.00 Hz  
 GB 0  
 PC 1.40

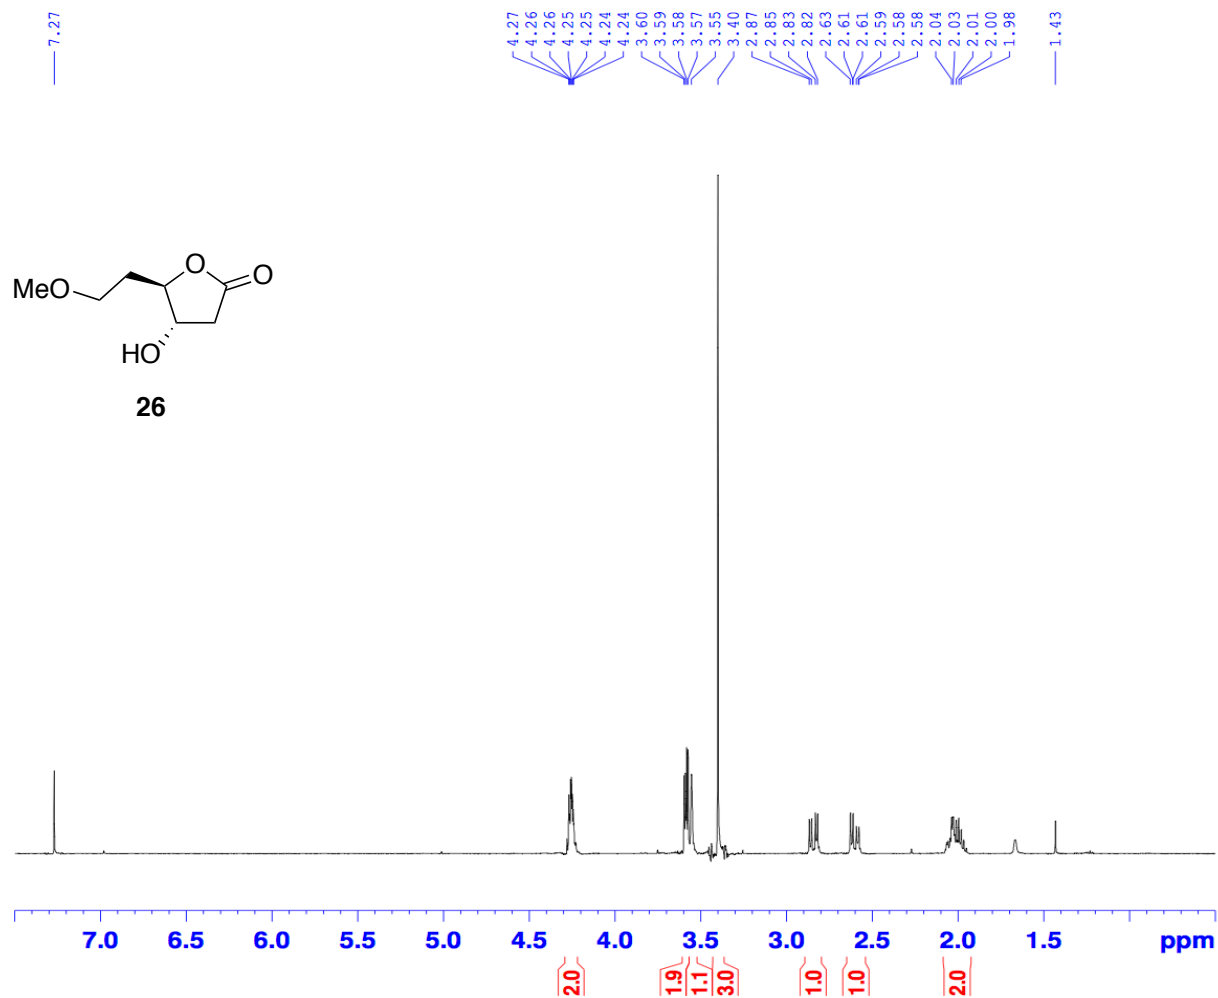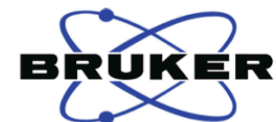

Current Data Parameters  
 NAME VIT-III-87-A  
 EXPNO 5  
 PROCNO 1

F2 - Acquisition Parameters  
 Date\_ 20120403  
 Time 16.11  
 INSTRUM spect  
 PROBHD 5 mm BBO BB-1H  
 PULPROG zg30  
 TD 65536  
 SOLVENT CDCl3  
 NS 8  
 DS 0  
 SWH 10000.000 Hz  
 FIDRES 0.152588 Hz  
 AQ 3.2768500 sec  
 RG 90.5  
 DW 50.000 usec  
 DE 6.50 usec  
 TE 298.1 K  
 D1 2.00000000 sec  
 TD0 1

===== CHANNEL f1 =====  
 NUC1 1H  
 P1 9.20 usec  
 PL1 -3.00 dB  
 PL1W 37.58904266 W  
 SFO1 500.2020889 MHz

F2 - Processing parameters  
 SI 32768  
 SF 500.1990105 MHz  
 WDW EM  
 SSB 0  
 LB 0.30 Hz  
 GB 0  
 PC 1.00

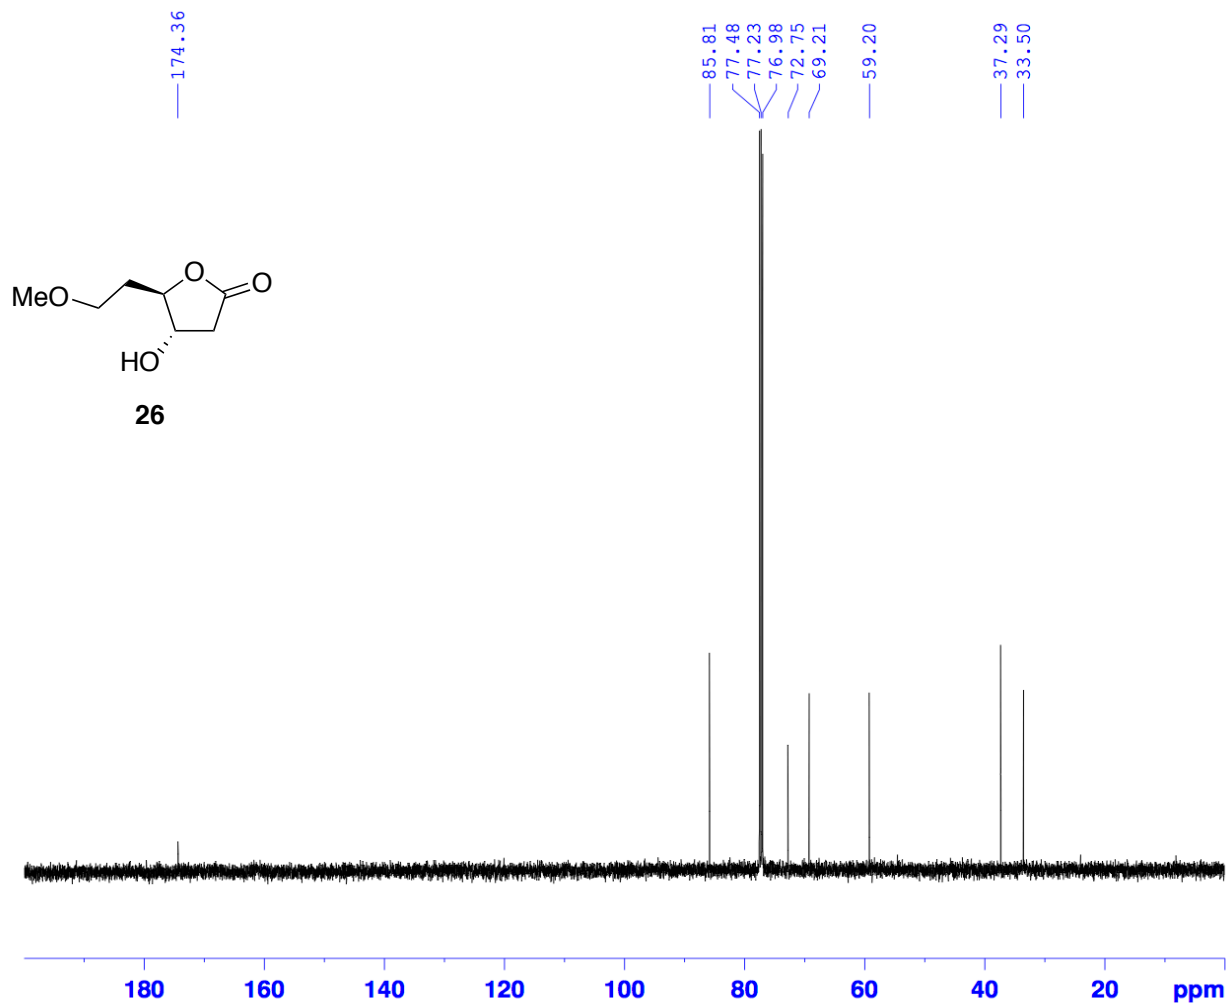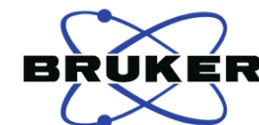

Current Data Parameters  
 NAME VIT-III-87-A  
 EXPNO 2  
 PROCNO 1

F2 - Acquisition Parameters  
 Date\_ 20120403  
 Time 15.46  
 INSTRUM spect  
 PROBHD 5 mm BBO BB-1H  
 PULPROG zgpg30  
 TD 65536  
 SOLVENT CDC13  
 NS 128  
 DS 4  
 SWH 30030.029 Hz  
 FIDRES 0.458222 Hz  
 AQ 1.0912244 sec  
 RG 5792.6  
 DW 16.650 usec  
 DE 6.50 usec  
 TE 298.5 K  
 D1 2.00000000 sec  
 D11 0.03000000 sec  
 TD0 1

===== CHANNEL f1 =====  
 NUC1 13C  
 P1 9.75 usec  
 PL1 2.00 dB  
 PL1W 49.29017639 W  
 SFO1 125.7877161 MHz

===== CHANNEL f2 =====  
 CPDPRG2 waltz16  
 NUC2 1H  
 PCPD2 70.00 usec  
 PL2 -3.00 dB  
 PL12 13.50 dB  
 PL13 13.50 dB  
 PL2W 37.58904266 W  
 PL12W 0.84151381 W  
 PL13W 0.84151381 W  
 SFO2 500.2010008 MHz

F2 - Processing parameters  
 SI 32768  
 SF 125.7751143 MHz  
 WDW EM  
 SSB 0  
 LB 1.00 Hz  
 GB 0  
 PC 1.40



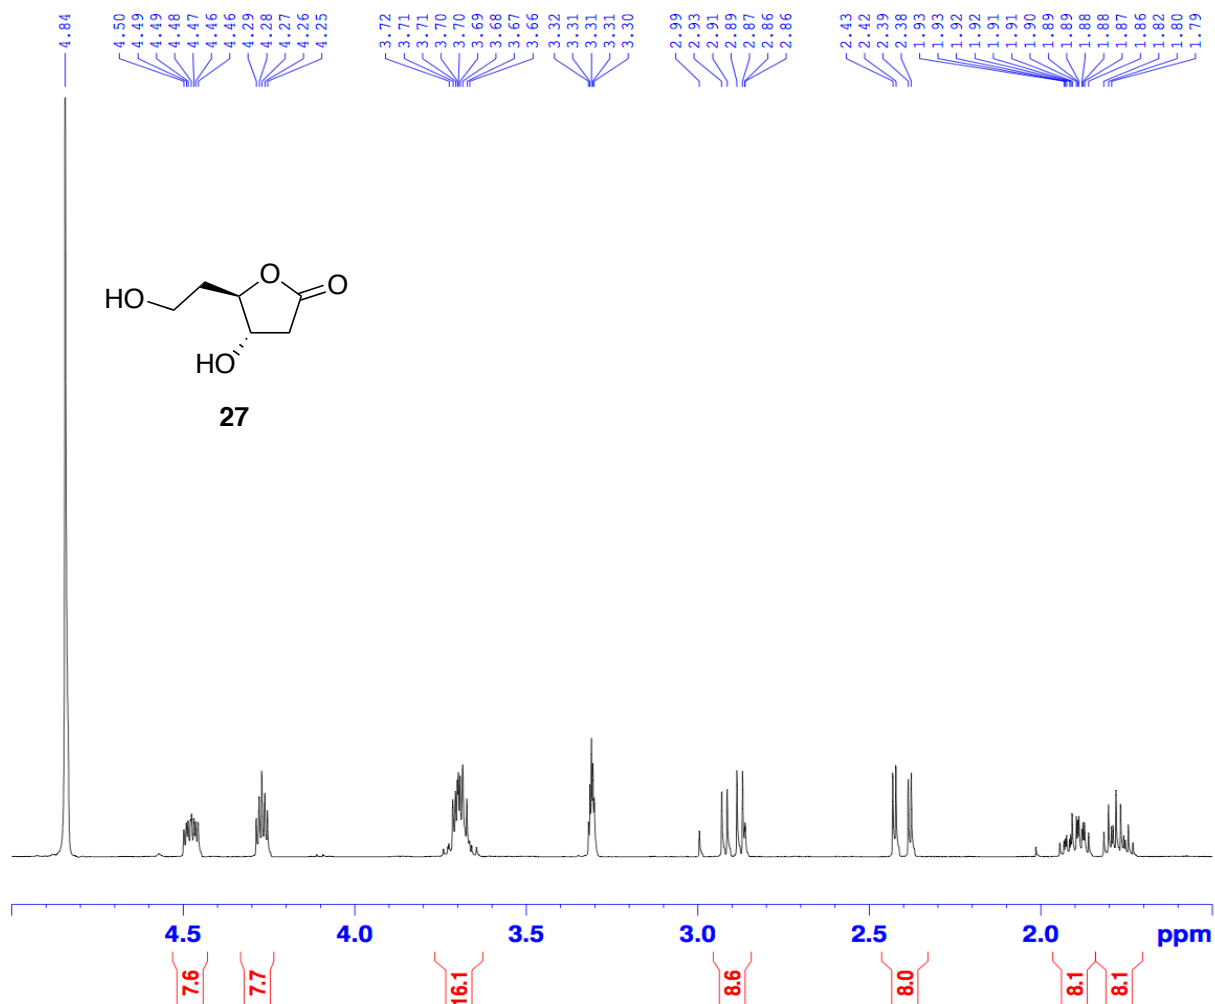

Current Data Parameters  
 NAME VIT-III-99-A2  
 EXPNO 1  
 PROCNO 1

F2 - Acquisition Parameters  
 Date\_ 20120421  
 Time 22.53  
 INSTRUM spect  
 PROBHD 5 mm BBO BB-1H  
 PULPROG zg30  
 TD 65536  
 SOLVENT MeOD  
 NS 16  
 DS 2  
 SWH 8278.146 Hz  
 FIDRES 0.126314 Hz  
 AQ 3.9584243 sec  
 RG 181  
 DW 60.400 usec  
 DE 6.50 usec  
 TE 298.3 K  
 D1 2.00000000 sec  
 TD0 1

===== CHANNEL f1 =====  
 NUC1 1H  
 P1 7.75 usec  
 PL1 -5.00 dB  
 PL1W 31.77312851 W  
 SFO1 400.1324710 MHz

F2 - Processing parameters  
 SI 32768  
 SF 400.1300076 MHz  
 WDW no  
 SSB 0  
 LB 0 Hz  
 GB 0  
 PC 1.00

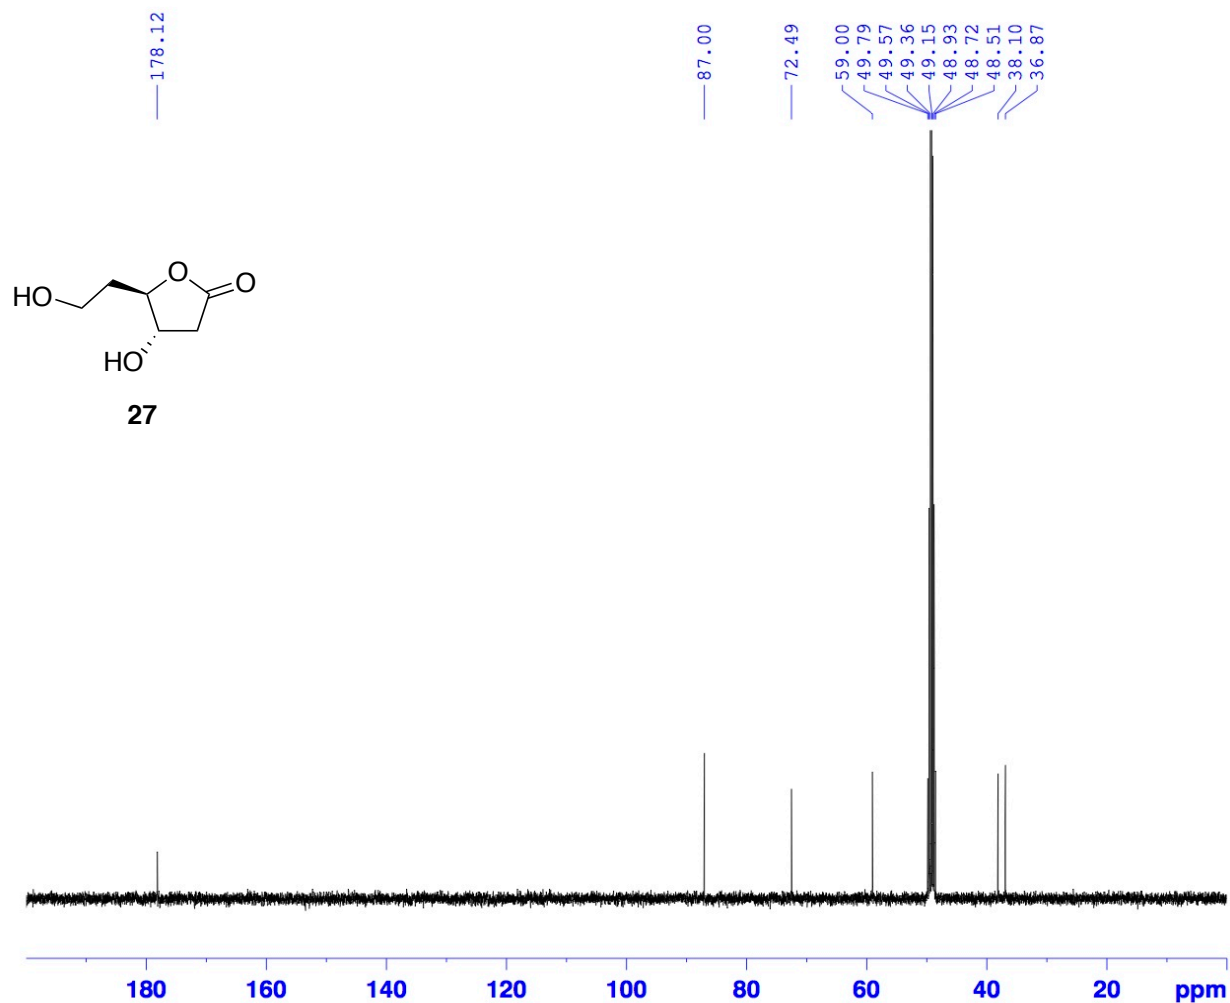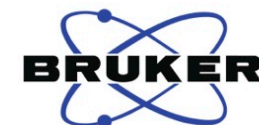

Current Data Parameters  
 NAME VTI-III-99-A2  
 EXPNO 2  
 PROCNO 1

F2 - Acquisition Parameters  
 Date\_ 20120421  
 Time 22.56  
 INSTRUM spect  
 PROBHD 5 mm BBO BB-1H  
 PULPROG zgpg30  
 TD 65536  
 SOLVENT MeOD  
 NS 129  
 DS 4  
 SWH 23980.814 Hz  
 FIDRES 0.365918 Hz  
 AQ 1.3664756 sec  
 RG 32768  
 DW 20.850 usec  
 DE 6.50 usec  
 TE 298.2 K  
 D1 2.00000000 sec  
 D11 0.03000000 sec  
 TD0 1

===== CHANNEL f1 =====  
 NUC1 13C  
 P1 6.60 usec  
 PL1 -4.00 dB  
 PL1W 25.23829460 W  
 SFO1 100.6228298 MHz

===== CHANNEL f2 =====  
 CPDPRG2 waltz16  
 NUC2 1H  
 PCPD2 70.00 usec  
 PL2 -5.00 dB  
 PL12 13.84 dB  
 PL13 13.84 dB  
 PL2W 31.77312851 W  
 PL12W 0.41501135 W  
 PL13W 0.41501135 W  
 SFO2 400.1316005 MHz

F2 - Processing parameters  
 SI 32768  
 SF 100.6126128 MHz  
 WDW EM  
 SSB 0  
 LB 1.00 Hz  
 GB 0  
 PC 1.40

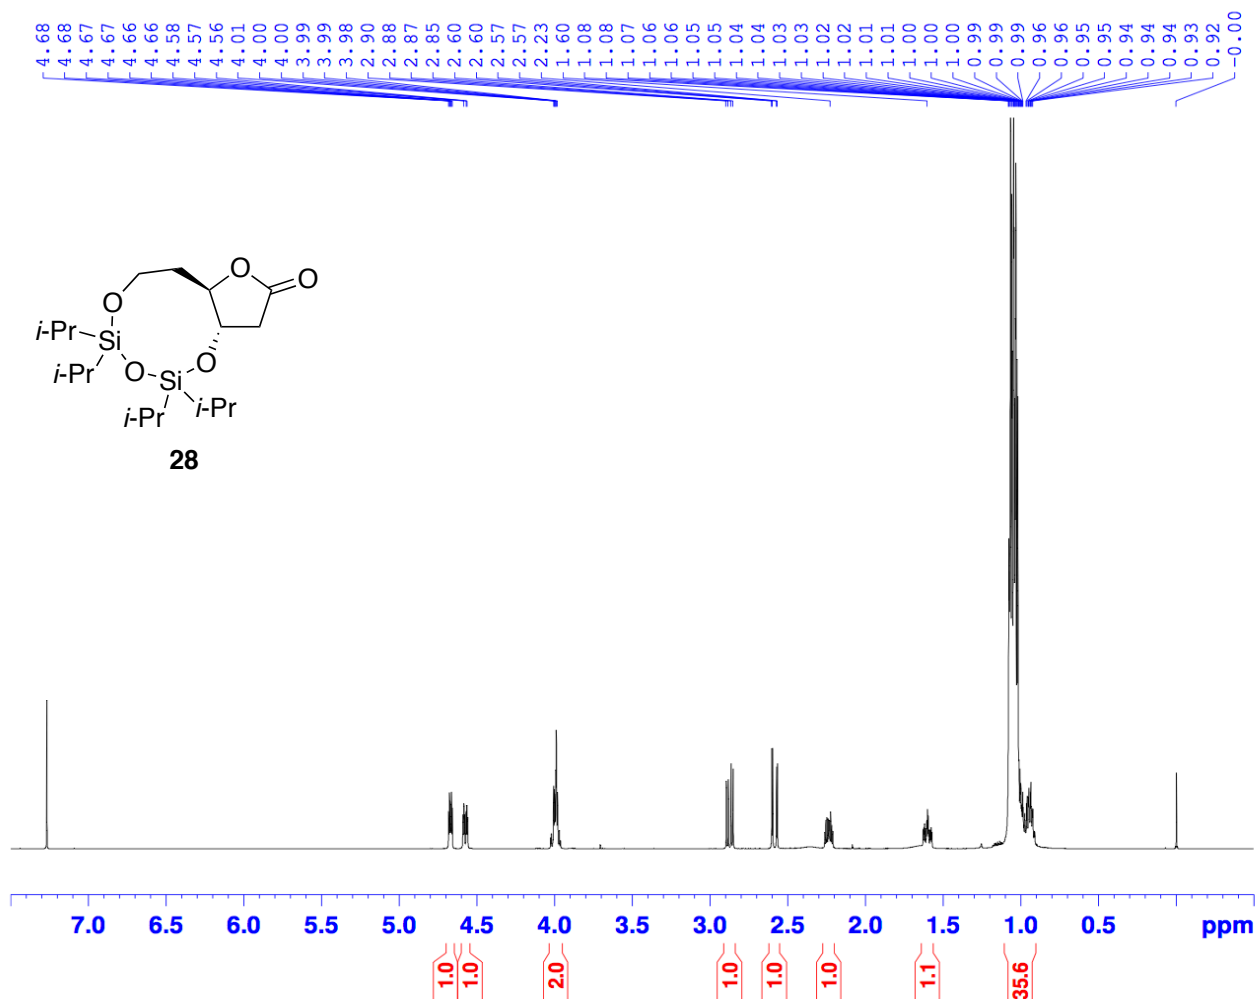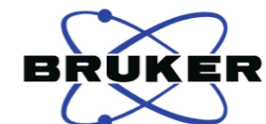

Current Data Parameters  
 NAME VTT-III-121-A  
 EXPNO 2  
 PROCNO 1

F2 - Acquisition Parameters  
 Date\_ 20120521  
 Time 13.53  
 INSTRUM spect  
 PROBHD 5 mm PAQXI 1H/  
 PULPROG zg30  
 TD 65536  
 SOLVENT CDCl3  
 NS 16  
 DS 2  
 SWH 12335.526 Hz  
 FIDRES 0.188225 Hz  
 AQ 2.6564426 sec  
 RG 33.59  
 DW 40.533 usec  
 DE 6.50 usec  
 TE 298.1 K  
 D1 2.00000000 sec  
 TD0 1

===== CHANNEL f1 =====  
 NUC1 1H  
 P1 9.79 usec  
 PLW1 9.30000019 W  
 SFO1 600.1937064 MHz

F2 - Processing parameters  
 SI 65536  
 SF 600.1900099 MHz  
 WDW EM  
 SSB 0  
 LB 0.30 Hz  
 GB 0  
 PC 1.00

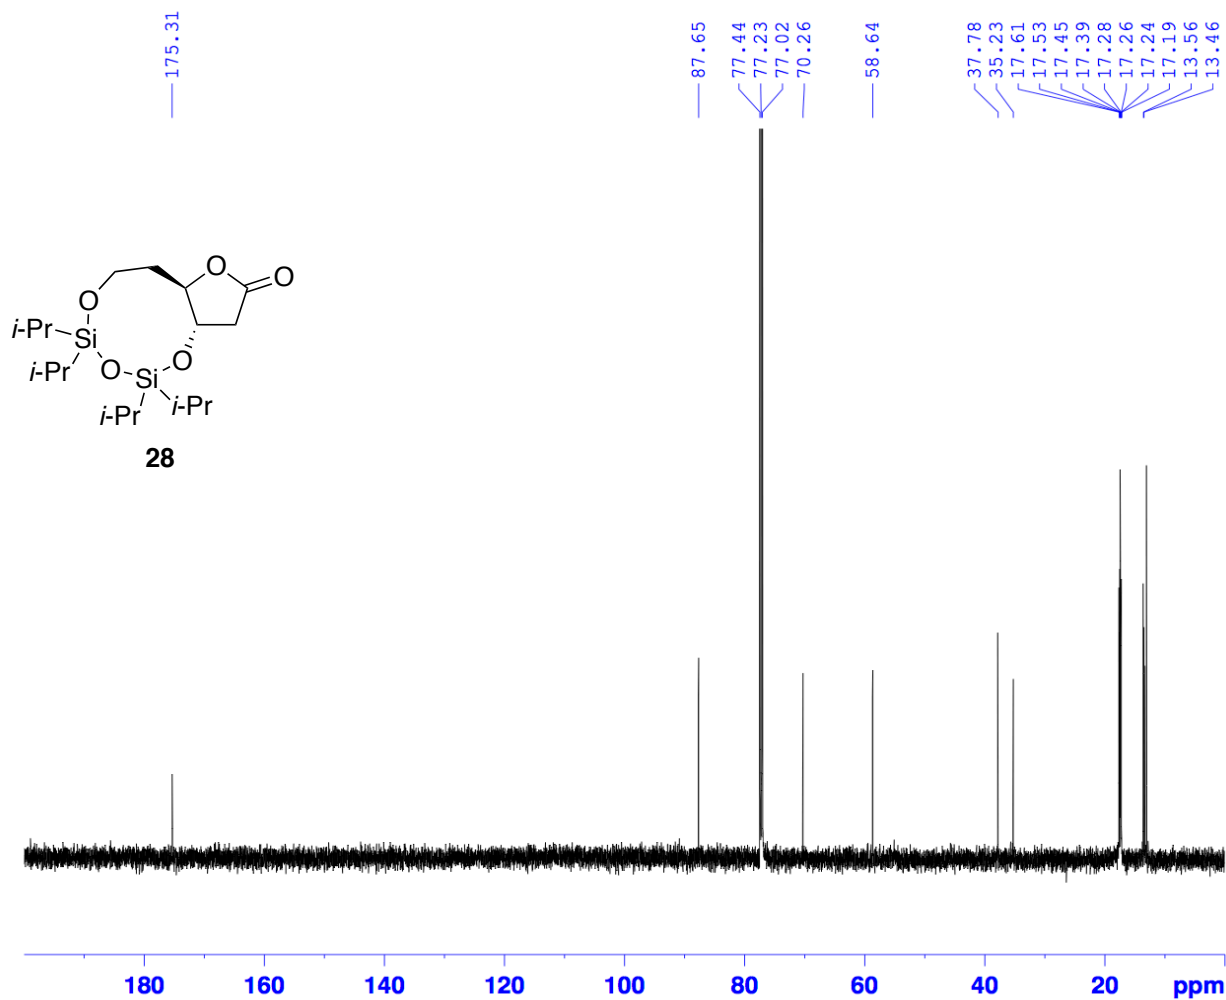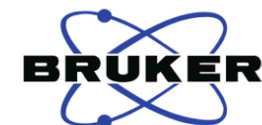

Current Data Parameters  
 NAME VTT-III-121-A  
 EXPNO 3  
 PROCNO 1

F2 - Acquisition Parameters  
 Date\_ 20120521  
 Time 14.00  
 INSTRUM spect  
 PROBHD 5 mm PAQXI 1H/  
 PULPROG zgpg30  
 TD 65536  
 SOLVENT CDC13  
 NS 128  
 DS 4  
 SWH 36057.691 Hz  
 FIDRES 0.550197 Hz  
 AQ 0.9088159 sec  
 RG 184.65  
 DW 13.867 usec  
 DE 6.50 usec  
 TE 298.1 K  
 D1 2.5000000 sec  
 D11 0.0300000 sec  
 TD0 1

----- CHANNEL f1 -----  
 NUC1 13C  
 P1 15.00 usec  
 PLW1 106.0000000 W  
 SFO1 150.9329866 MHz

----- CHANNEL f2 -----  
 CPDPRG2 waltz16  
 NUC2 1H  
 PCPD2 70.00 usec  
 PLW2 9.30000019 W  
 PLW12 0.18190999 W  
 PLW13 0.08913500 W  
 SFO2 600.1924008 MHz

F2 - Processing parameters  
 SI 32768  
 SF 150.9178647 MHz  
 WDW EM  
 SSB 0  
 LB 1.00 Hz  
 GB 0  
 PC 1.40

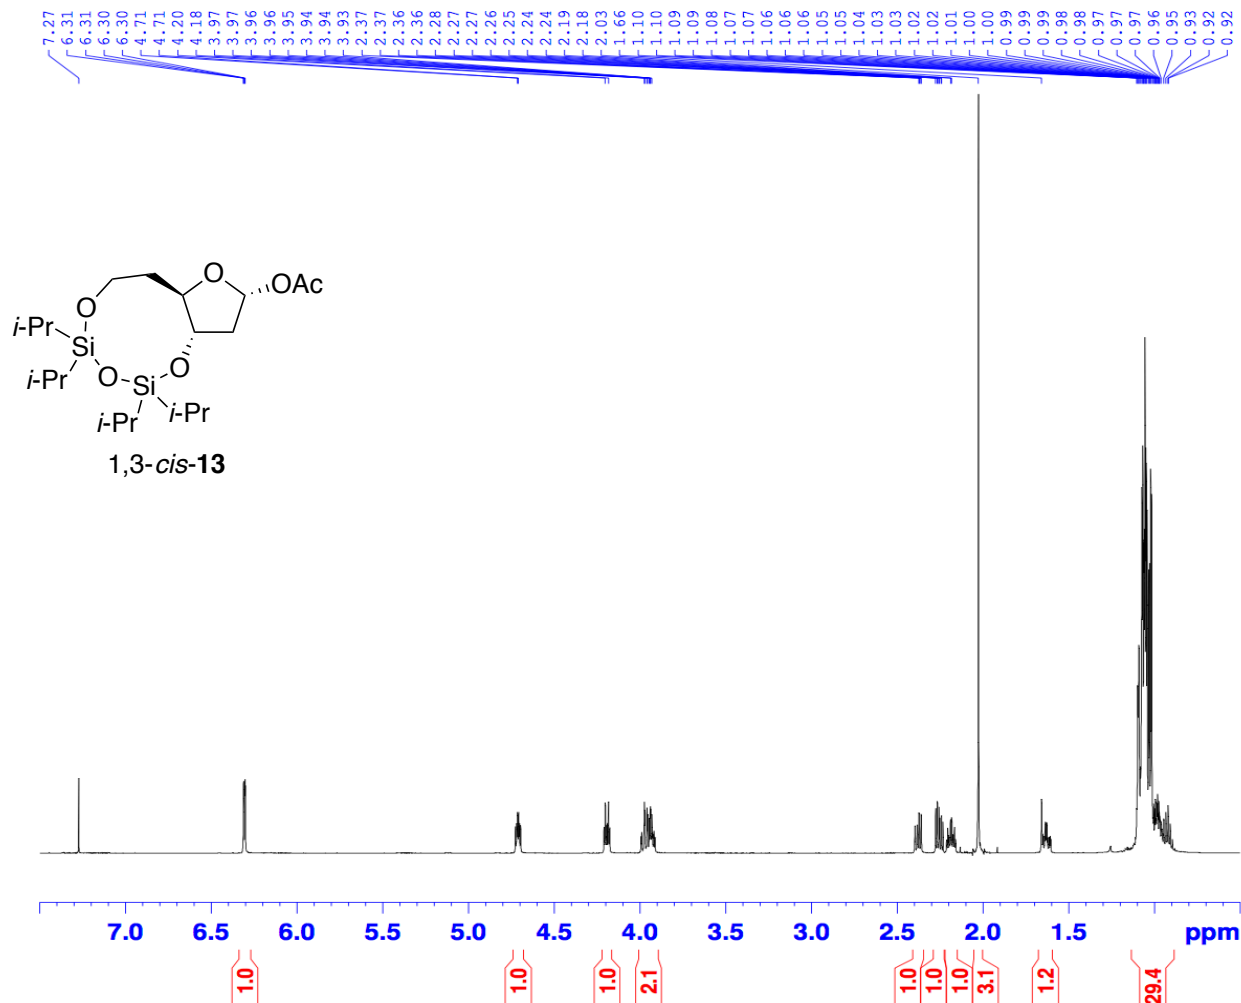

Current Data Parameters  
 NAME VIT-III-147-A  
 EXPNO 2  
 PROCNO 1

F2 - Acquisition Parameters  
 Date\_ 20120620  
 Time 13.38  
 INSTRUM spect  
 PROBHD 5 mm PAQXI 1H/  
 PULPROG zg30  
 TD 65536  
 SOLVENT CDCl3  
 NS 8  
 DS 0  
 SWH 12335.526 Hz  
 FIDRES 0.188225 Hz  
 AQ 2.6564426 sec  
 RG 33.59  
 DW 40.533 usec  
 DE 6.50 usec  
 TE 298.1 K  
 D1 2.00000000 sec  
 TD0 1

===== CHANNEL f1 =====  
 NUC1 1H  
 P1 9.79 usec  
 PLW1 9.30000019 W  
 SFO1 600.1937064 MHz

F2 - Processing parameters  
 SI 65536  
 SF 600.1900075 MHz  
 WDW EM  
 SSB 0  
 LB 0.30 Hz  
 GB 0  
 PC 1.00

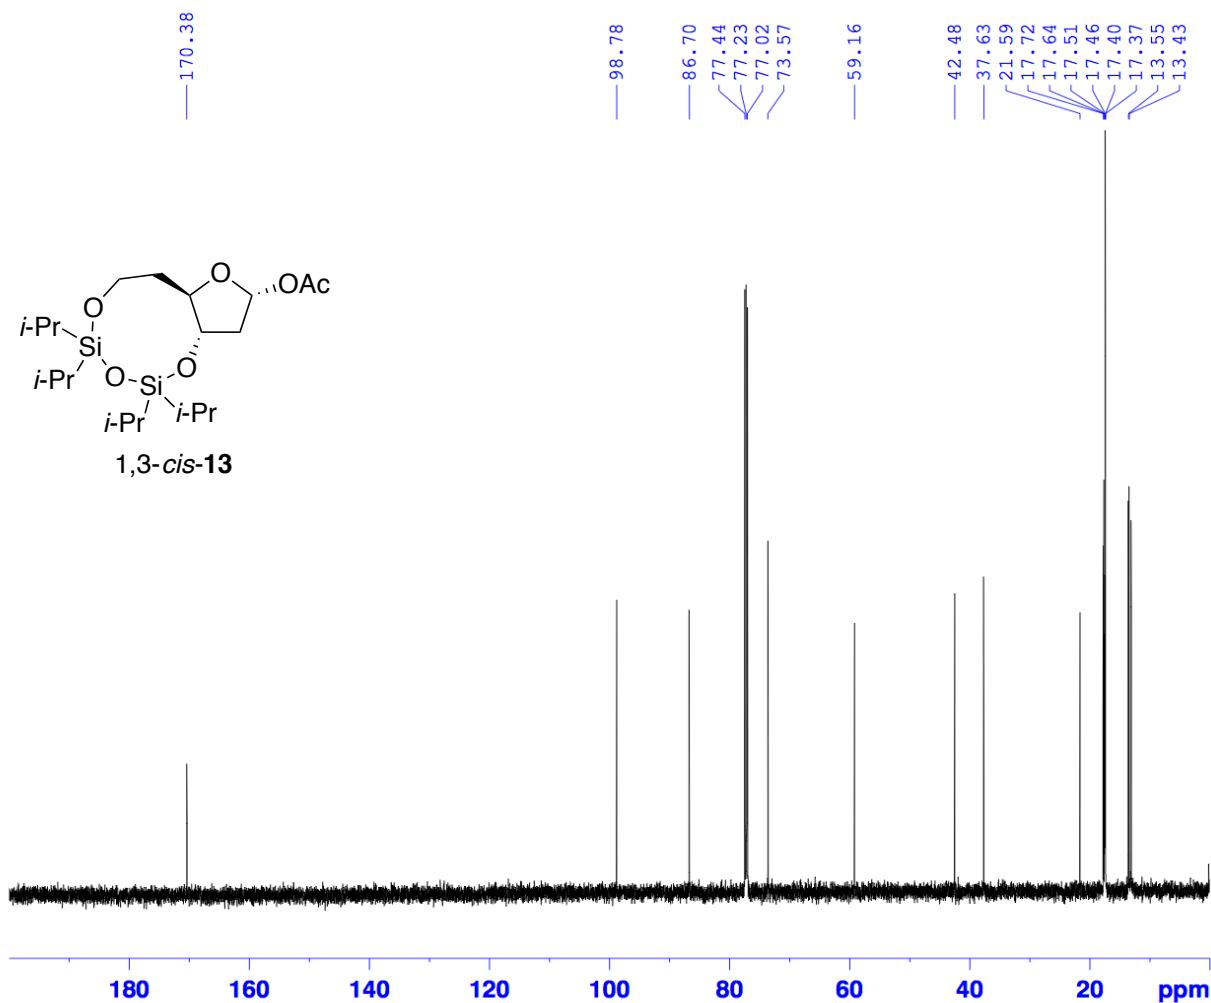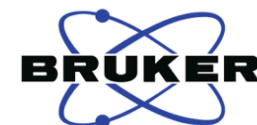

Current Data Parameters  
 NAME VTT-III-147-A  
 EXPNO 3  
 PROCNO 1

F2 - Acquisition Parameters  
 Date\_ 20120620  
 Time 13.38  
 INSTRUM spect  
 PROBHD 5 mm PAQXI 1H/  
 PULPROG zgpg30  
 TD 65536  
 SOLVENT CDC13  
 NS 128  
 DS 0  
 SWH 36057.691 Hz  
 FIDRES 0.550197 Hz  
 AQ 0.9088159 sec  
 RG 184.65  
 DW 13.867 usec  
 DE 6.50 usec  
 TE 298.2 K  
 D1 2.0000000 sec  
 D11 0.03000000 sec  
 TD0 1

===== CHANNEL f1 =====  
 NUC1 13C  
 P1 15.00 usec  
 PLW1 106.0000000 W  
 SFO1 150.9329866 MHz

===== CHANNEL f2 =====  
 CPDPRG2 waltz16  
 NUC2 1H  
 PCPD2 70.00 usec  
 PLW2 9.30000019 W  
 PLW12 0.18190999 W  
 PLW13 0.08913500 W  
 SFO2 600.1924008 MHz

F2 - Processing parameters  
 SI 32768  
 SF 150.9178656 MHz  
 WDW EM  
 SSB 0  
 LB 1.00 Hz  
 GB 0  
 PC 1.40

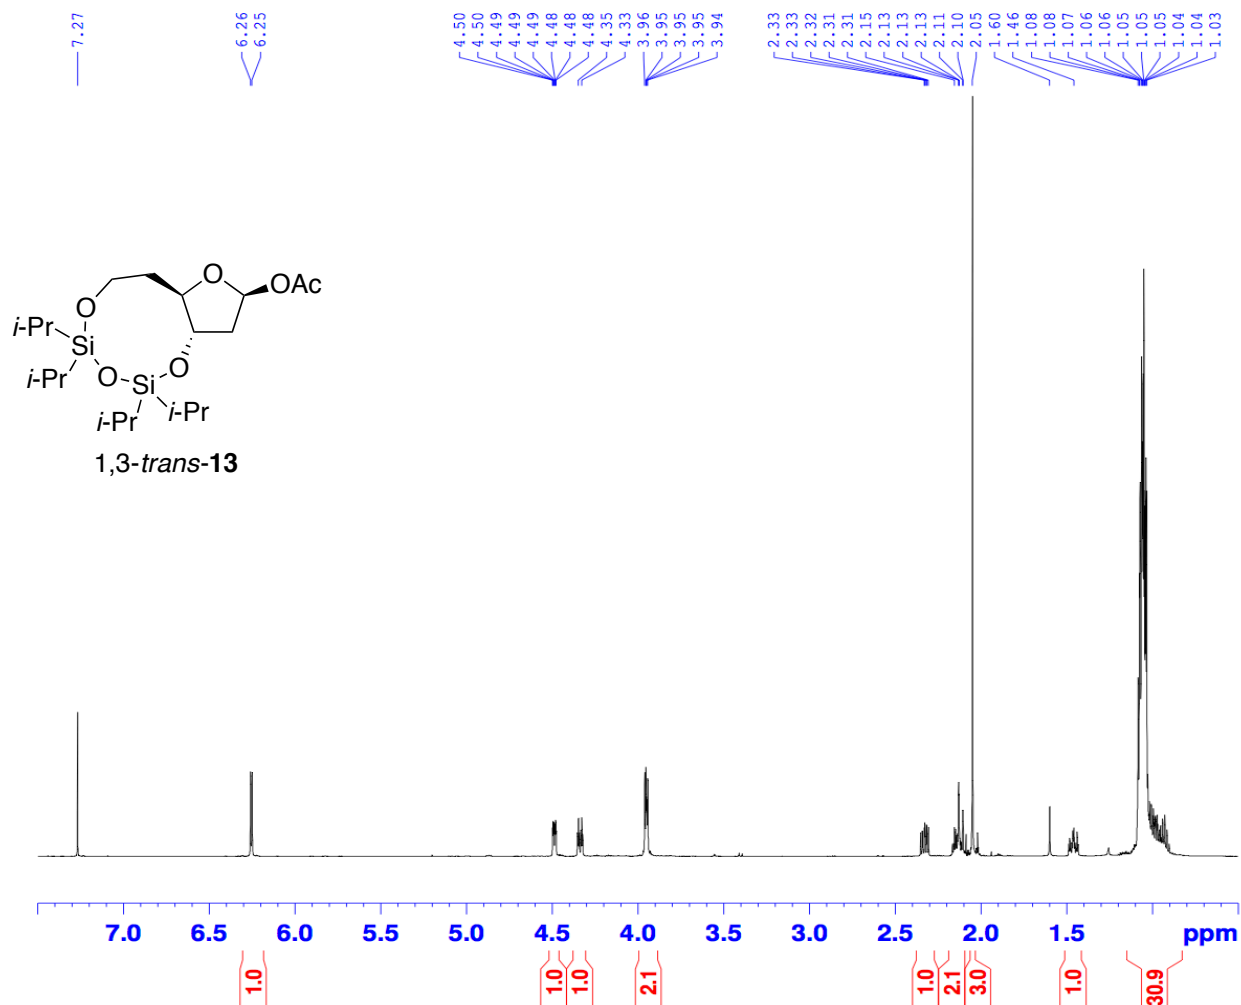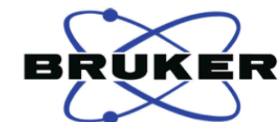

Current Data Parameters  
 NAME VIT-III-147-B  
 EXPNO 2  
 PROCNO 1

F2 - Acquisition Parameters  
 Date\_ 20120620  
 Time 14.06  
 INSTRUM spect  
 PROBHD 5 mm PAQXI 1H/  
 PULPROG zg30  
 TD 65536  
 SOLVENT CDC13  
 NS 8  
 DS 0  
 SWH 12335.526 Hz  
 FIDRES 0.188225 Hz  
 AQ 2.6564426 sec  
 RG 56.41  
 DW 40.533 usec  
 DE 6.50 usec  
 TE 298.2 K  
 D1 2.00000000 sec  
 TDO 1

===== CHANNEL f1 =====  
 NUC1 1H  
 P1 9.79 usec  
 PLW1 9.30000019 W  
 SFO1 600.1937064 MHz

F2 - Processing parameters  
 SI 65536  
 SF 600.1900107 MHz  
 WDW EM  
 SSB 0  
 LB 0.30 Hz  
 GB 0  
 PC 1.00

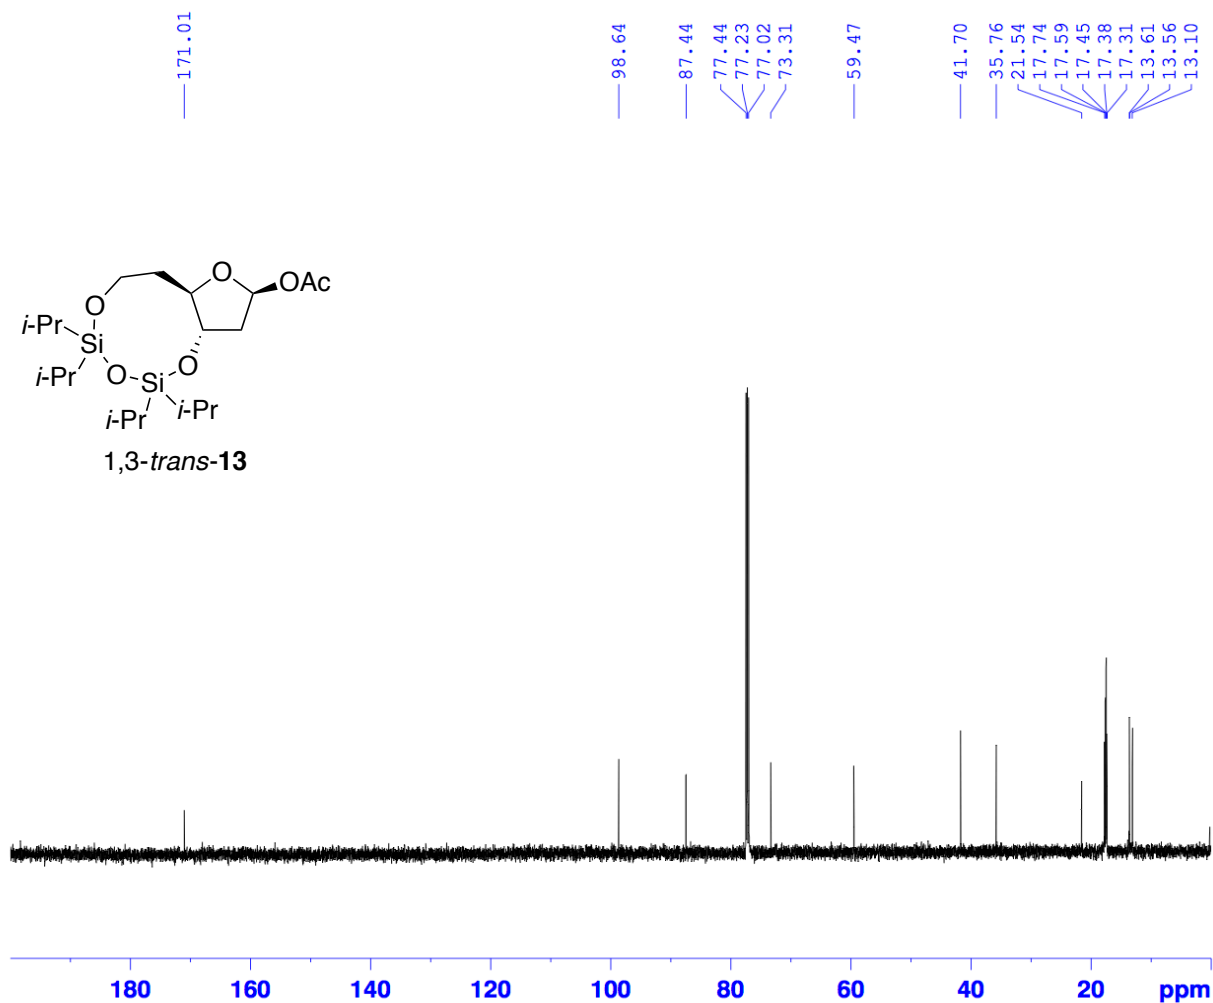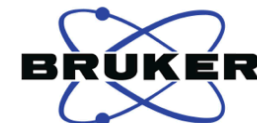

Current Data Parameters  
 NAME VTT-III-147-B  
 EXPNO 3  
 PROCNO 1

F2 - Acquisition Parameters  
 Date\_ 20120620  
 Time 14.10  
 INSTRUM spect  
 PROBHD 5 mm PAQXI 1H/  
 PULPROG zgpg30  
 TD 65536  
 SOLVENT CDC13  
 NS 128  
 DS 0  
 SWH 36057.691 Hz  
 FIDRES 0.550197 Hz  
 AQ 0.9088159 sec  
 RG 184.65  
 DW 13.867 usec  
 DE 6.50 usec  
 TE 298.1 K  
 D1 2.0000000 sec  
 D11 0.03000000 sec  
 TD0 1

===== CHANNEL f1 =====  
 NUC1 13C  
 P1 15.00 usec  
 PLW1 106.0000000 W  
 SFO1 150.9329866 MHz

===== CHANNEL f2 =====  
 CPDPRG2 waltz16  
 NUC2 1H  
 PCPD2 70.00 usec  
 PLW2 9.30000019 W  
 PLW12 0.18190999 W  
 PLW13 0.08913500 W  
 SFO2 600.1924008 MHz

F2 - Processing parameters  
 SI 32768  
 SF 150.9178640 MHz  
 WDW EM  
 SSB 0  
 LB 1.00 Hz  
 GB 0  
 PC 1.40





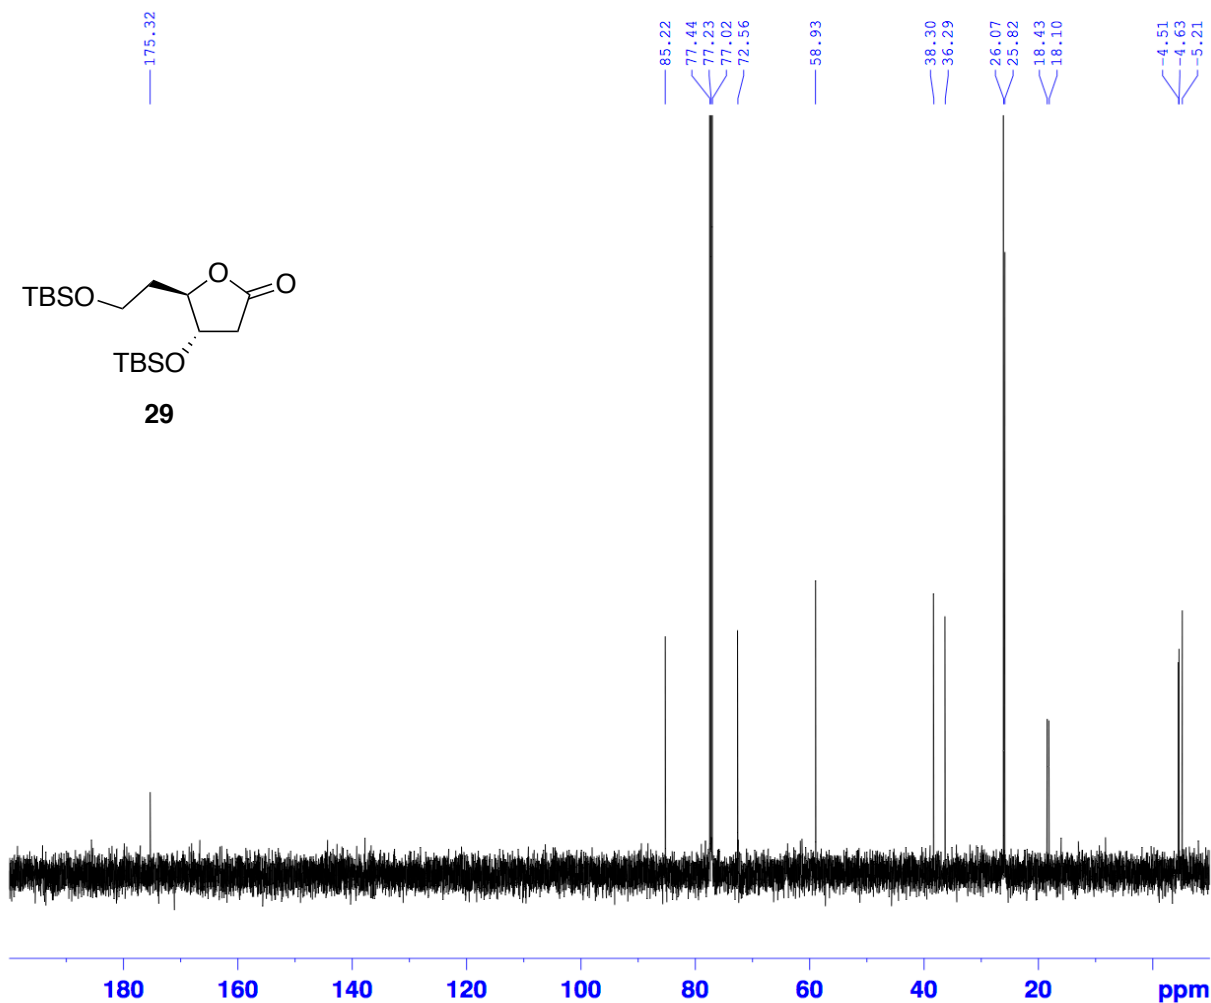

Current Data Parameters  
 NAME VTT-III-185-A  
 EXPNO 2  
 PROCNO 1

F2 - Acquisition Parameters  
 Date\_ 20120728  
 Time 12.32  
 INSTRUM spect  
 PROBHD 5 mm PABBO BB/  
 PULPROG zgpg30  
 TD 65536  
 SOLVENT CDCl3  
 NS 128  
 DS 0  
 SWH 36057.691 Hz  
 FIDRES 0.550197 Hz  
 AQ 0.9088159 sec  
 RG 184.65  
 DW 13.867 usec  
 DE 6.50 usec  
 TE 298.3 K  
 D1 2.5000000 sec  
 D11 0.03000000 sec  
 TD0 1

----- CHANNEL f1 -----  
 NUC1 13C  
 P1 10.65 usec  
 PLW1 104.0000000 W  
 SFO1 150.9329866 MHz

----- CHANNEL f2 -----  
 CPDPRG2 waltz16  
 NUC2 1H  
 PCPD2 70.00 usec  
 PLW2 26.50000000 W  
 PLW12 0.65438998 W  
 PLW13 0.32065001 W  
 SFO2 600.1924008 MHz

F2 - Processing parameters  
 SI 32768  
 SF 150.9178645 MHz  
 WDW EM  
 SSB 0  
 LB 1.00 Hz  
 GB 0  
 PC 1.40

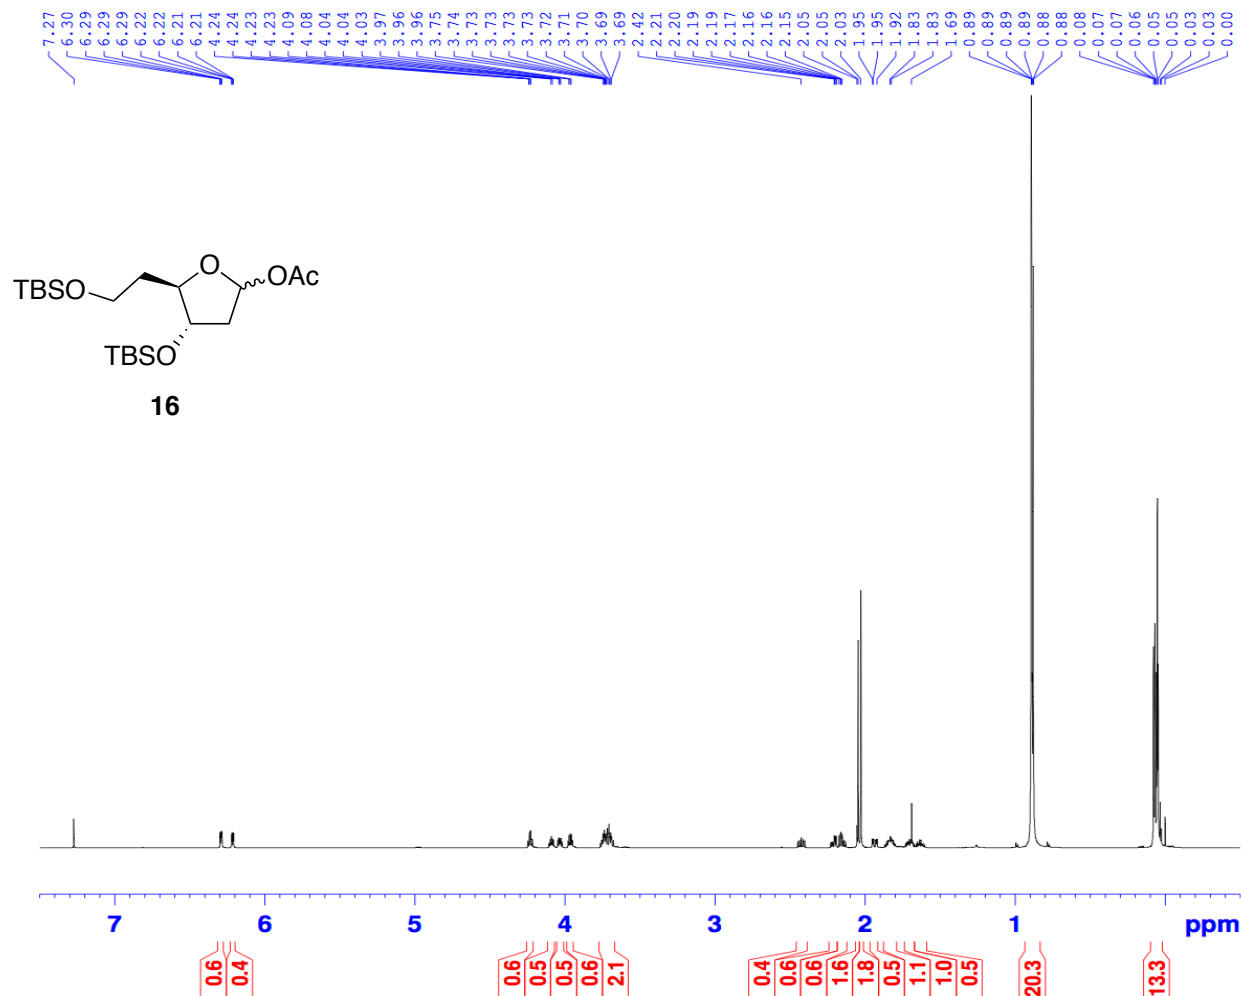

Current Data Parameters  
NAME VIT-III-190-A  
EXPNO 1  
PROCNO 1

F2 - Acquisition Parameters  
Date\_ 20120801  
Time 22.30  
INSTRUM spect  
PROBHD 5 mm PABBO BB/  
PULPROG zg30  
TD 65536  
SOLVENT CDCl3  
NS 8  
DS 0  
SWH 12335.526 Hz  
FIDRES 0.188225 Hz  
AQ 2.6564426 sec  
RG 33.59  
DW 40.533 usec  
DE 6.50 usec  
TE 298.2 K  
D1 2.00000000 sec  
TD0 1

===== CHANNEL f1 =====  
NUC1 1H  
P1 11.00 usec  
PLW1 26.5000000 W  
SFO1 600.1937064 MHz

F2 - Processing parameters  
SI 65536  
SF 600.1900084 MHz  
WDW EM  
SSB 0  
LB 0.30 Hz  
GB 0  
PC 1.00

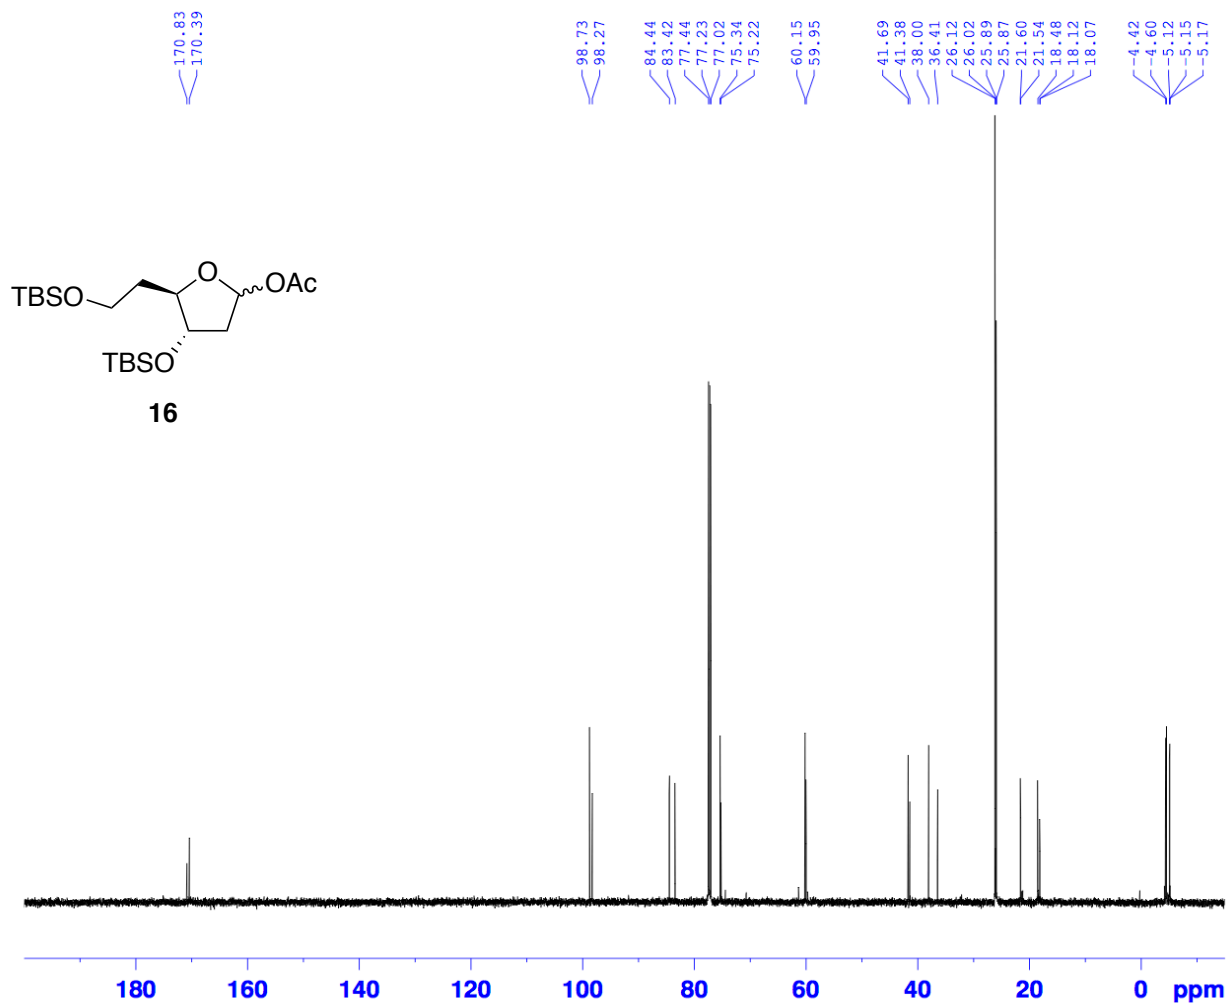

Current Data Parameters  
 NAME VTT-III-190-A  
 EXPNO 2  
 PROCNO 1

F2 - Acquisition Parameters  
 Date\_ 20120801  
 Time 22.38  
 INSTRUM spect  
 PROBHD 5 mm PABBO BB/  
 PULPROG zgpg30  
 TD 65536  
 SOLVENT CDCl3  
 NS 128  
 DS 0  
 SWH 36057.691 Hz  
 FIDRES 0.550197 Hz  
 AQ 0.9088159 sec  
 RG 184.65  
 DW 13.867 usec  
 DE 6.50 usec  
 TE 298.1 K  
 D1 2.5000000 sec  
 D11 0.03000000 sec  
 TD0 1

===== CHANNEL f1 =====  
 NUC1 13C  
 P1 10.65 usec  
 PLW1 104.0000000 W  
 SFO1 150.9329866 MHz

===== CHANNEL f2 =====  
 CPDPRG2 waltz16  
 NUC2 1H  
 PCPD2 70.00 usec  
 PLW2 26.50000000 W  
 PLW12 0.65438998 W  
 PLW13 0.32065001 W  
 SFO2 600.1924008 MHz

F2 - Processing parameters  
 SI 32768  
 SF 150.9178651 MHz  
 WDW EM  
 SSB 0  
 LB 1.00 Hz  
 GB 0  
 PC 1.40

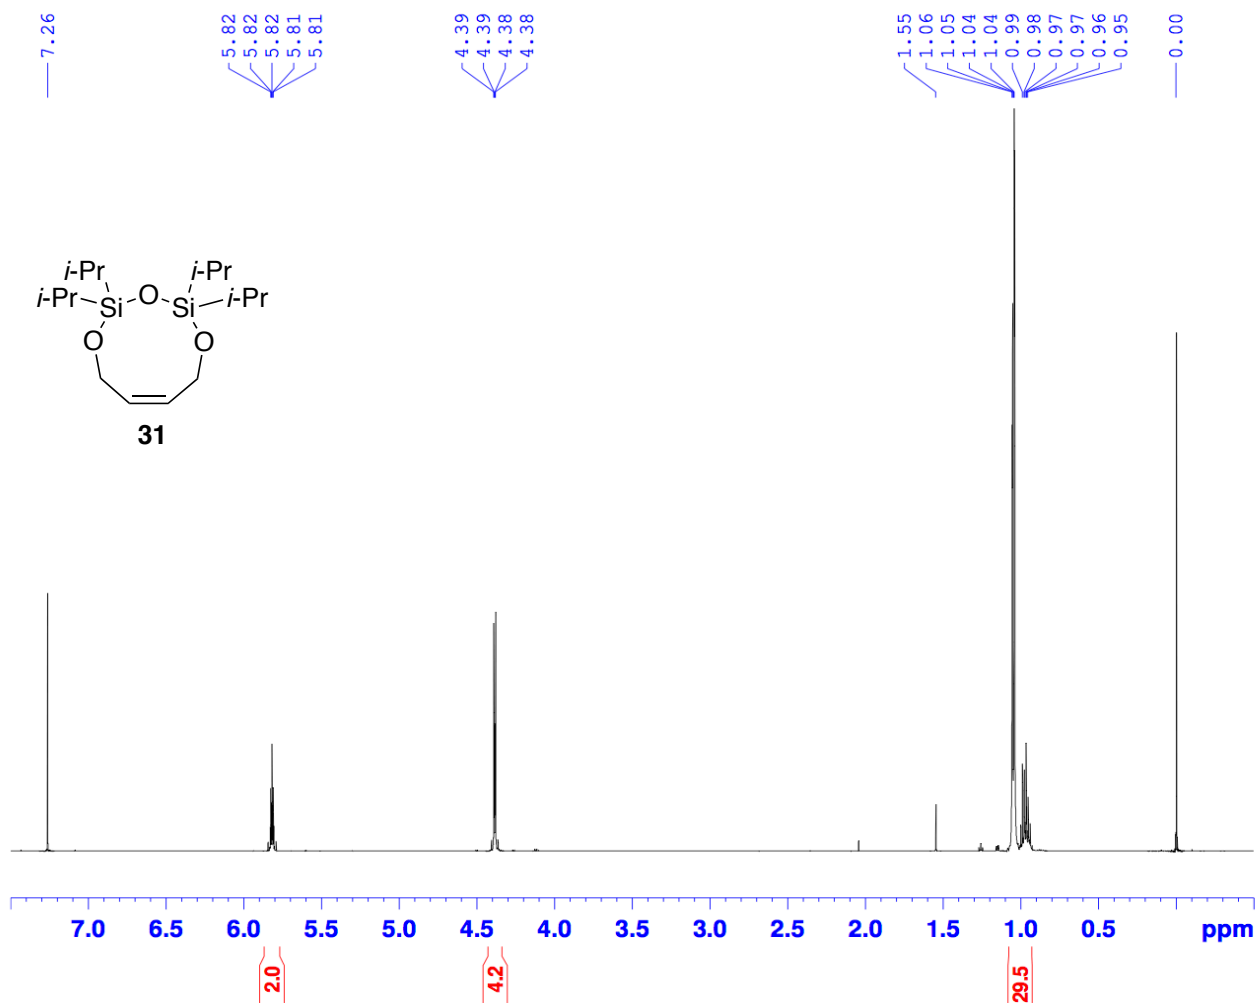

Current Data Parameters  
 NAME VTT-IV-26-A  
 EXPNO 1  
 PROCNO 1

F2 - Acquisition Parameters  
 Date\_ 20121005  
 Time 16.08  
 INSTRUM spect  
 PROBHD 5 mm PAQXI 1H/  
 PULPROG zg30  
 TD 65536  
 SOLVENT CDCl3  
 NS 8  
 DS 0  
 SWH 12335.526 Hz  
 FIDRES 0.188225 Hz  
 AQ 2.6564426 sec  
 RG 92.46  
 DW 40.533 usec  
 DE 6.50 usec  
 TE 298.2 K  
 D1 2.00000000 sec  
 TD0 1

===== CHANNEL f1 =====  
 NUC1 1H  
 P1 9.79 usec  
 PLW1 9.30000019 W  
 SFO1 600.1937064 MHz

F2 - Processing parameters  
 SI 65536  
 SF 600.1900134 MHz  
 WDW no  
 SSB 0  
 LB 0 Hz  
 GB 0  
 PC 1.00

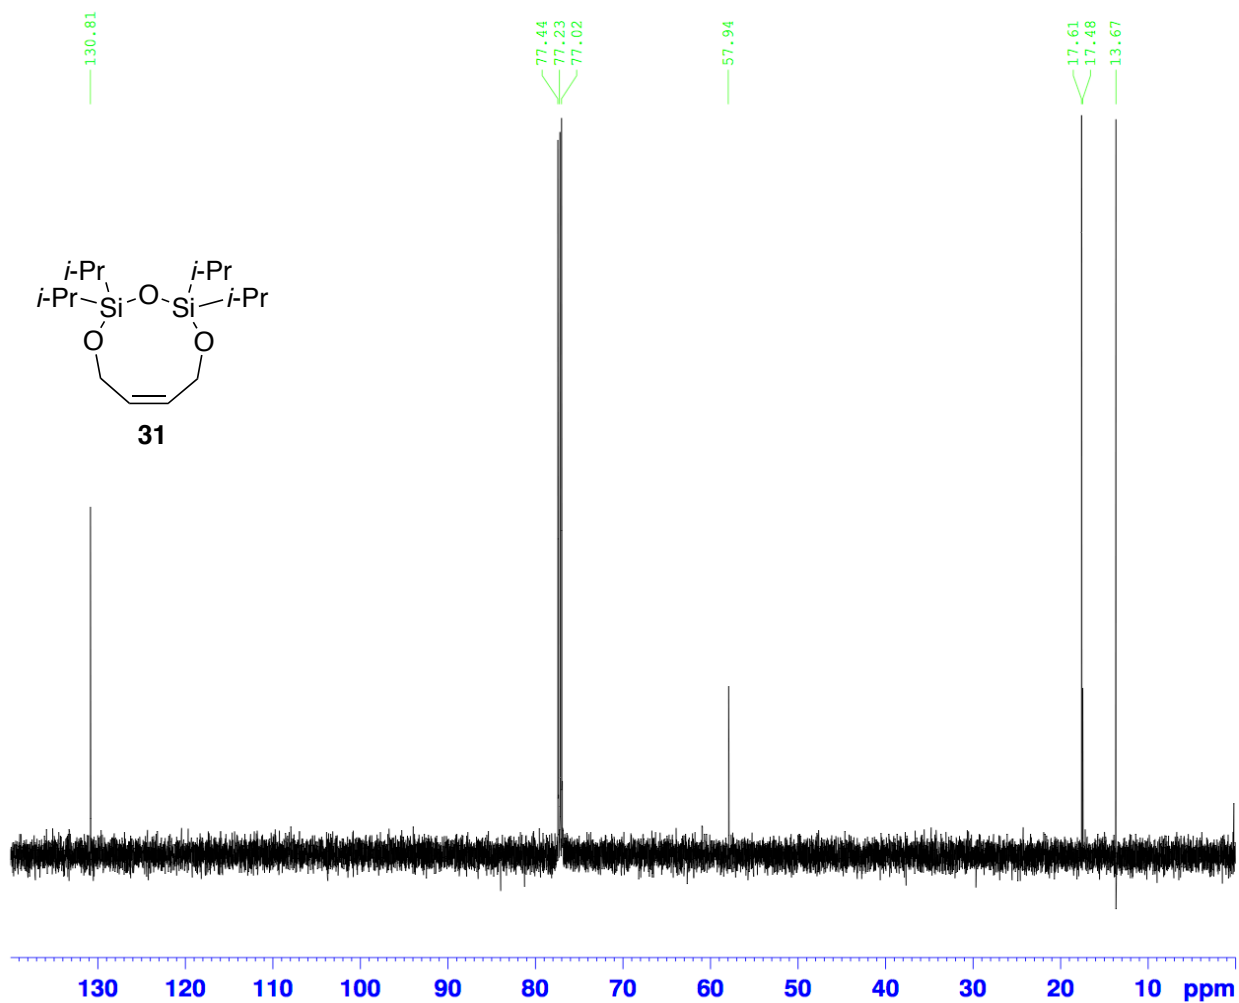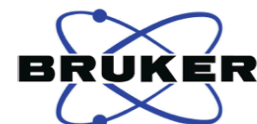

Current Data Parameters  
 NAME VTT-IV-26-A  
 EXPNO 2  
 PROCNO 1

F2 - Acquisition Parameters  
 Date\_ 20121005  
 Time 16.09  
 INSTRUM spect  
 PROBHD 5 mm PAQXI 1H/  
 PULPROG zgpg30  
 TD 65536  
 SOLVENT CDC13  
 NS 128  
 DS 0  
 SWH 36057.691 Hz  
 FIDRES 0.550197 Hz  
 AQ 0.9088159 sec  
 RG 184.65  
 DW 13.867 usec  
 DE 6.50 usec  
 TE 298.2 K  
 D1 2.00000000 sec  
 D11 0.03000000 sec  
 TD0 1

===== CHANNEL f1 =====  
 NUC1 13C  
 P1 15.00 usec  
 PLW1 106.00000000 W  
 SFO1 150.9329866 MHz

===== CHANNEL f2 =====  
 CPDPRG2 waltz16  
 NUC2 1H  
 PCPD2 70.00 usec  
 PLW2 9.30000019 W  
 PLW12 0.18190999 W  
 PLW13 0.08913500 W  
 SFO2 600.1924008 MHz

F2 - Processing parameters  
 SI 32768  
 SF 150.9178624 MHz  
 WDW no  
 SSB 0  
 LB 0 Hz  
 GB 0  
 PC 1.40

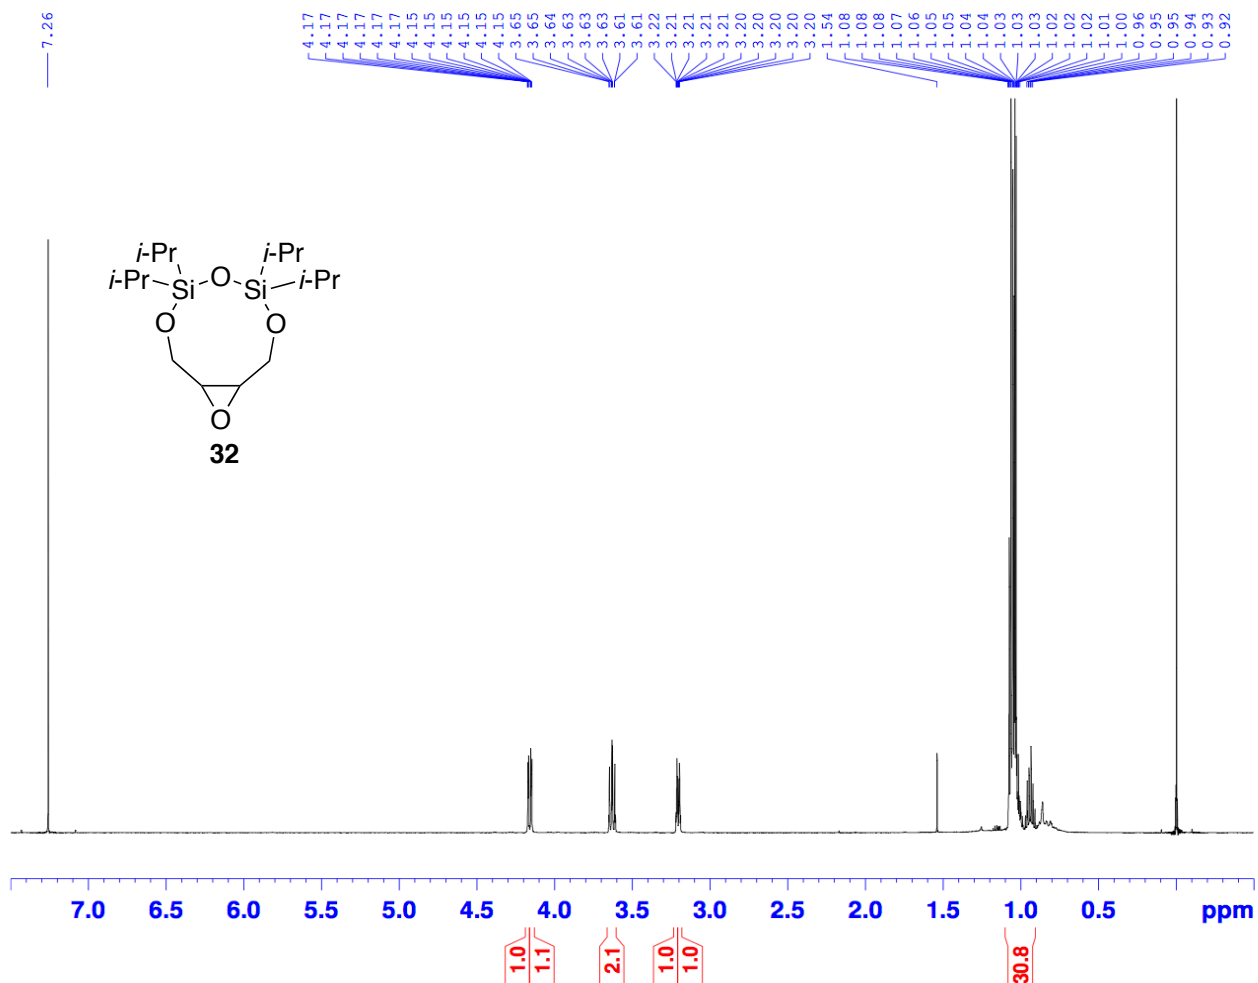

Current Data Parameters  
 NAME VIT-IV-28-A  
 EXPNO 5  
 PROCNO 1

F2 - Acquisition Parameters  
 Date\_ 20121007  
 Time 13.26  
 INSTRUM spect  
 PROBHD 5 mm PAQXI 1H/  
 PULPROG zg30  
 TD 65536  
 SOLVENT CDCl3  
 NS 8  
 DS 0  
 SWH 12335.526 Hz  
 FIDRES 0.188225 Hz  
 AQ 2.6564426 sec  
 RG 113.19  
 DW 40.533 usec  
 DE 6.50 usec  
 TE 298.1 K  
 D1 2.00000000 sec  
 TD0 1

===== CHANNEL f1 =====  
 NUC1 1H  
 P1 9.79 usec  
 PLW1 9.30000019 W  
 SFO1 600.1937064 MHz

F2 - Processing parameters  
 SI 65536  
 SF 600.1900134 MHz  
 WDW no  
 SSB 0  
 LB 0 Hz  
 GB 0  
 PC 1.00





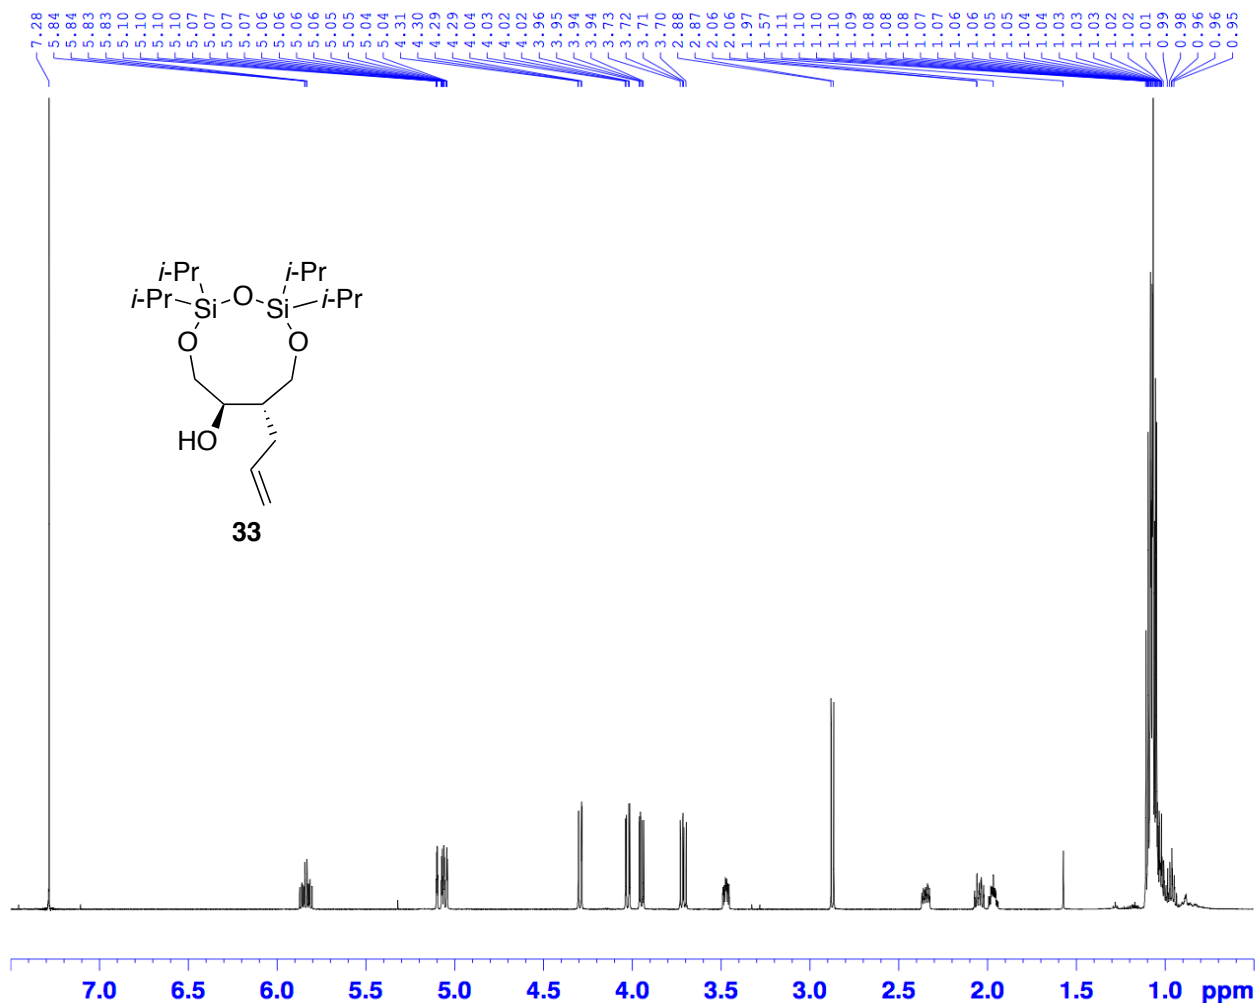

Current Data Parameters  
 NAME VIT-IV-29-A  
 EXPNO 5  
 PROCNO 1

F2 - Acquisition Parameters  
 Date\_ 20121008  
 Time 17.09  
 INSTRUM spect  
 PROBHD 5 mm PAQXI 1H/  
 PULPROG zg30  
 TD 65536  
 SOLVENT CDCl3  
 NS 8  
 DS 0  
 SWH 12335.526 Hz  
 FIDRES 0.188225 Hz  
 AQ 2.6564426 sec  
 RG 104.51  
 DW 40.533 usec  
 DE 6.50 usec  
 TE 298.1 K  
 D1 2.00000000 sec  
 TD0 1

===== CHANNEL f1 =====  
 NUC1 1H  
 P1 9.79 usec  
 PLW1 9.30000019 W  
 SFO1 600.1937064 MHz

F2 - Processing parameters  
 SI 65536  
 SF 600.1900000 MHz  
 WDW no  
 SSB 0  
 LB 0 Hz  
 GB 0  
 PC 1.00

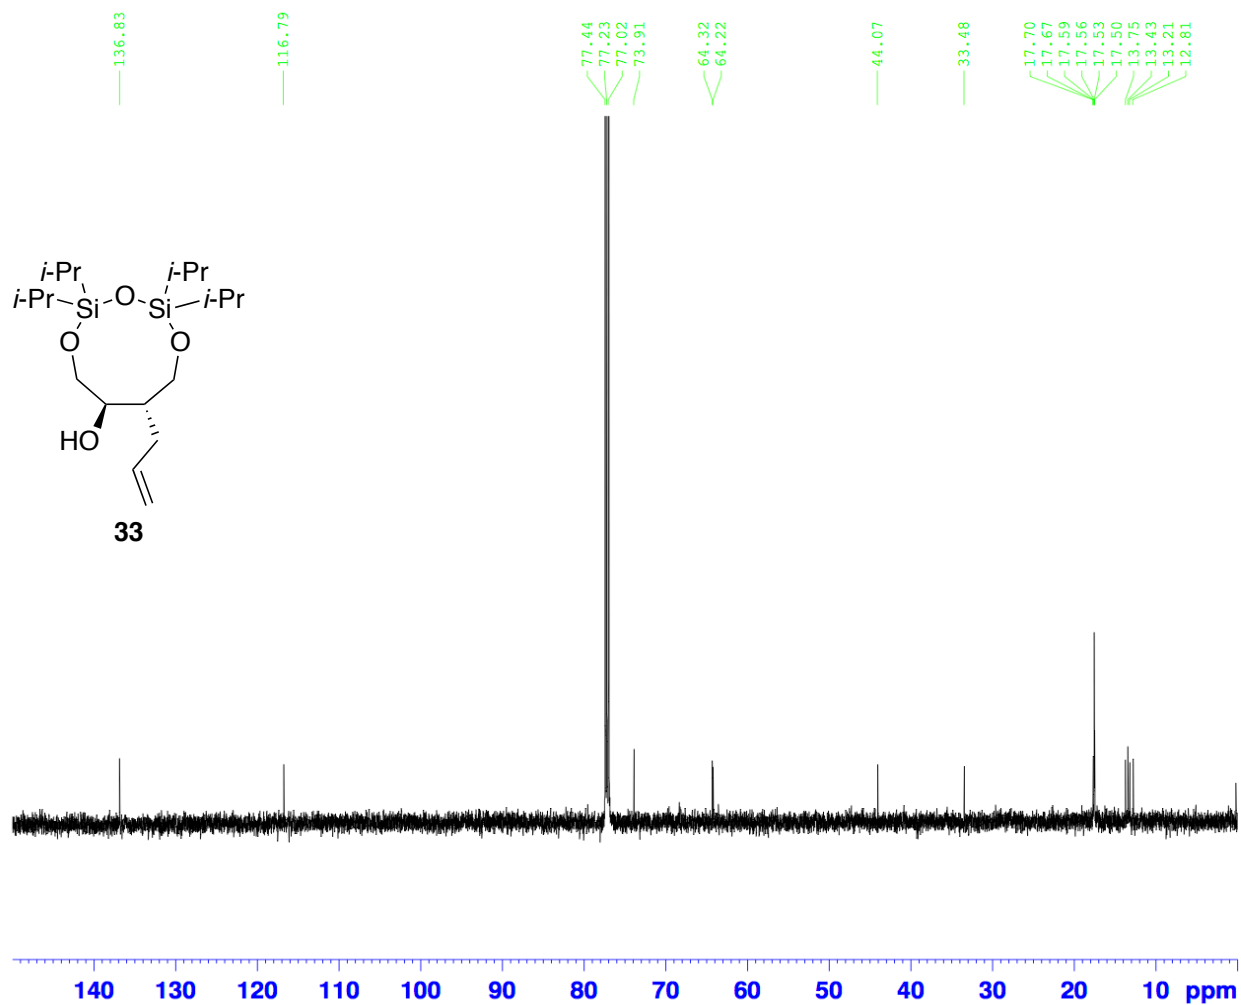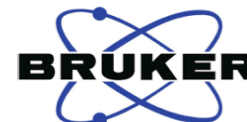

Current Data Parameters  
 NAME VTT-IV-29-A  
 EXPNO 2  
 PROCNO 1

F2 - Acquisition Parameters  
 Date\_ 20121008  
 Time 17.13  
 INSTRUM spect  
 PROBHD 5 mm PAQXI 1H/  
 PULPROG zgpg30  
 TD 65536  
 SOLVENT CDCl3  
 NS 128  
 DS 0  
 SWH 36057.691 Hz  
 FIDRES 0.550197 Hz  
 AQ 0.9088159 sec  
 RG 184.65  
 DW 13.867 usec  
 DE 6.50 usec  
 TE 298.1 K  
 D1 2.50000000 sec  
 D11 0.03000000 sec  
 TD0 1

===== CHANNEL f1 =====  
 NUC1 13C  
 P1 15.00 usec  
 PLW1 106.00000000 W  
 SFO1 150.9329866 MHz

===== CHANNEL f2 =====  
 CPDPRG2 waltz16  
 NUC2 1H  
 PCPD2 70.00 usec  
 PLW2 9.30000019 W  
 PLW12 0.18190999 W  
 PLW13 0.08913500 W  
 SFO2 600.1924008 MHz

F2 - Processing parameters  
 SI 32768  
 SF 150.9178629 MHz  
 WDW EM  
 SSB 0  
 LB 1.00 Hz  
 GB 0  
 PC 1.40

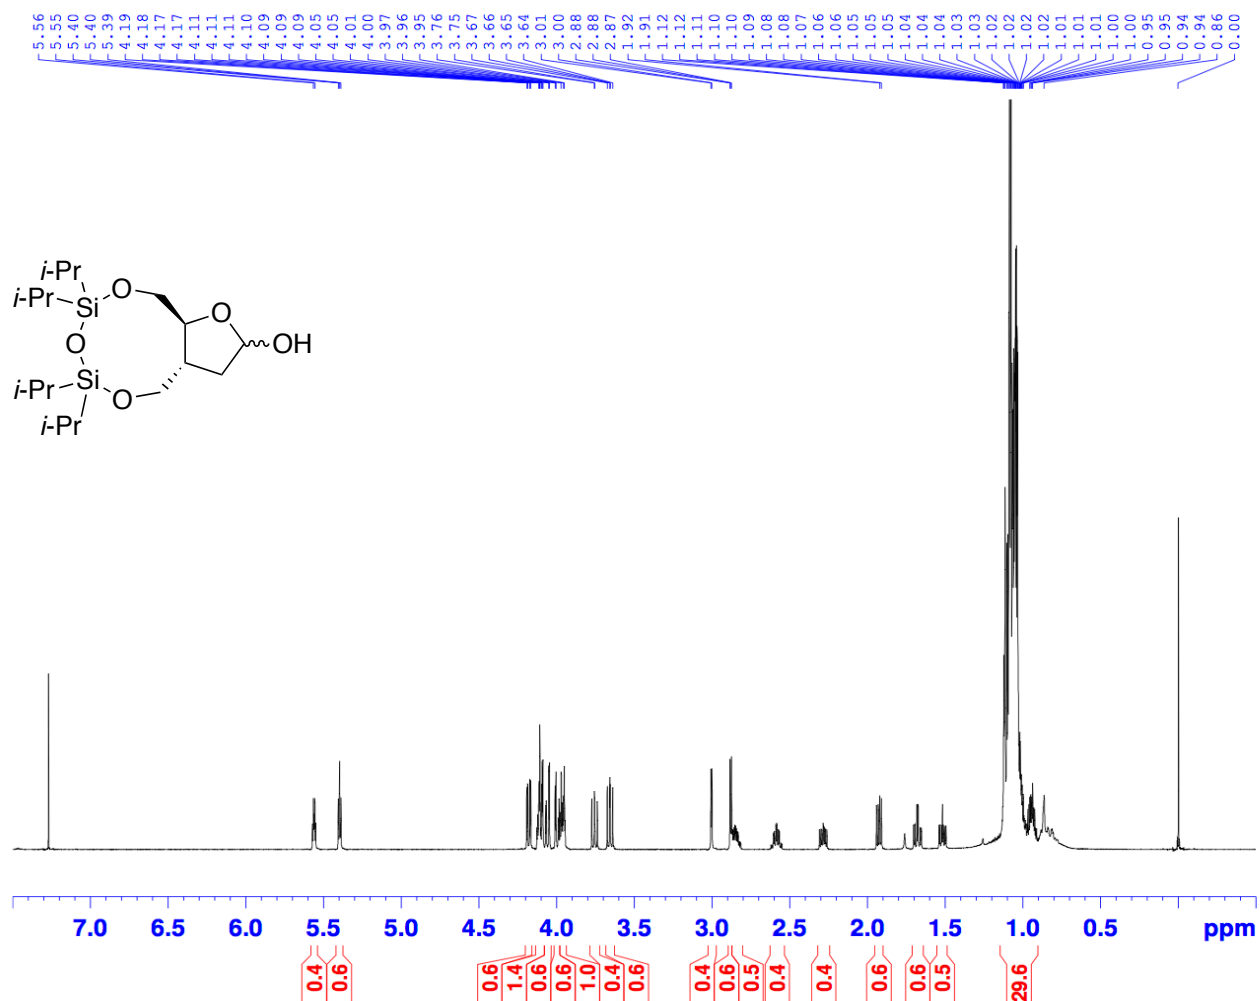

Current Data Parameters  
 NAME VTT-IV-30-A2  
 EXPNO 1  
 PROCNO 1

F2 - Acquisition Parameters  
 Date\_ 20121010  
 Time 13.03  
 INSTRUM spect  
 PROBHD 5 mm PAQXI 1H/  
 PULPROG zg30  
 TD 65536  
 SOLVENT CDCl3  
 NS 8  
 DS 0  
 SWH 12335.526 Hz  
 FIDRES 0.188225 Hz  
 AQ 2.6564426 sec  
 RG 18.8  
 DW 40.533 usec  
 DE 6.50 usec  
 TE 298.1 K  
 D1 2.00000000 sec  
 TDO 1

----- CHANNEL f1 -----  
 NUC1 1H  
 P1 9.79 usec  
 PLW1 9.30000019 W  
 SFO1 600.1937064 MHz

F2 - Processing parameters  
 SI 65536  
 SF 600.1900085 MHz  
 WDW no  
 SSB 0  
 LB 0 Hz  
 GB 0  
 PC 1.00

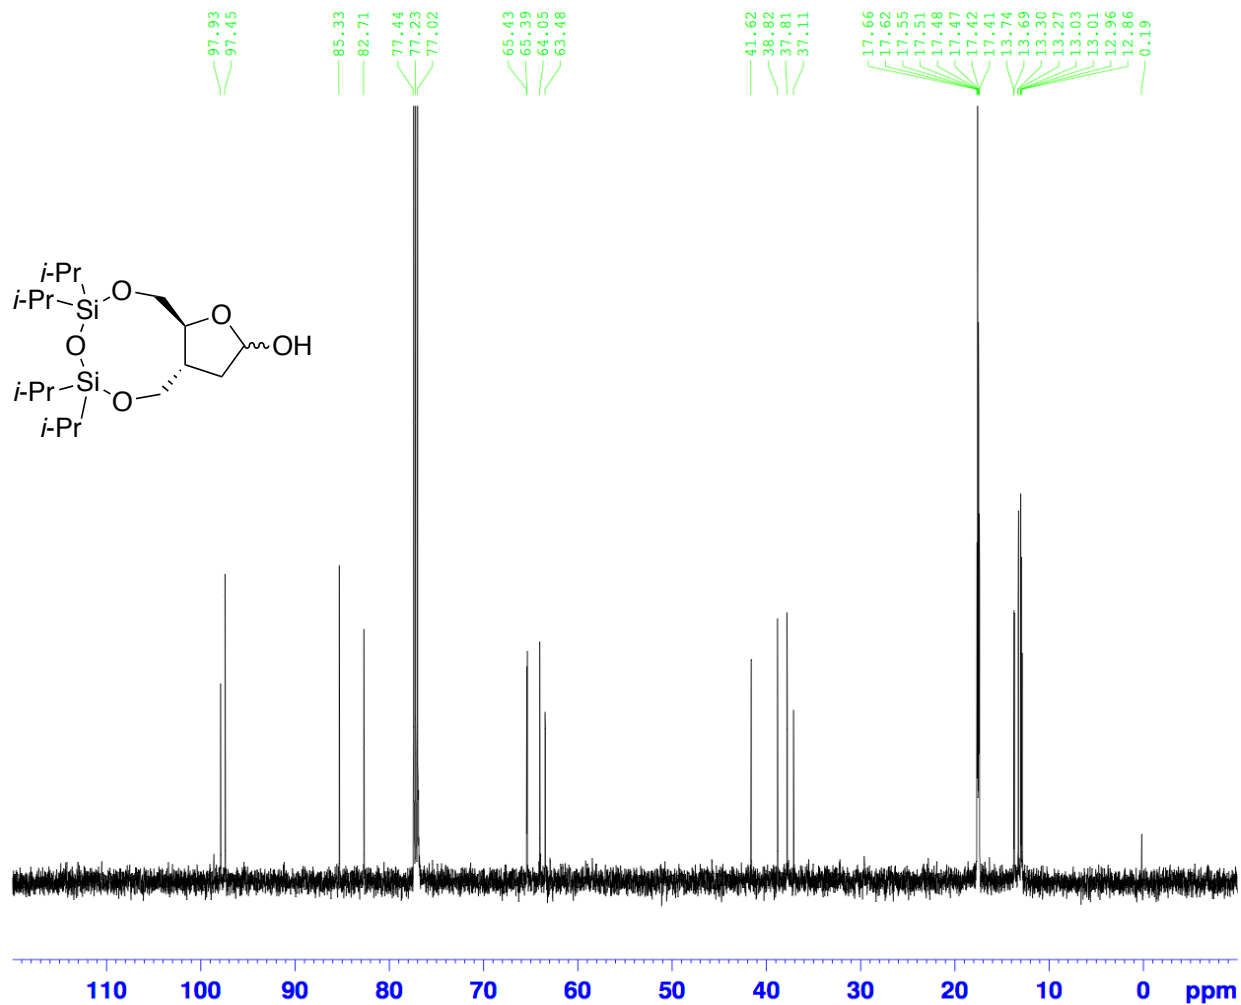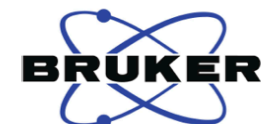

Current Data Parameters  
 NAME VIT-IV-30-A2  
 EXPNO 2  
 PROCNO 1

F2 - Acquisition Parameters  
 Date\_ 20121010  
 Time 13.07  
 INSTRUM spect  
 PROBHD 5 mm PAQXI 1H/  
 PULPROG zgpg30  
 TD 65536  
 SOLVENT CDC13  
 NS 128  
 DS 0  
 SWH 36057.691 Hz  
 FIDRES 0.550197 Hz  
 AQ 0.9088159 sec  
 RG 184.65  
 DW 13.867 usec  
 DE 6.50 usec  
 TE 298.1 K  
 D1 2.00000000 sec  
 D11 0.03000000 sec  
 TD0 1

===== CHANNEL f1 =====  
 NUC1 13C  
 P1 15.00 usec  
 PLW1 106.00000000 W  
 SFO1 150.9329866 MHz

===== CHANNEL f2 =====  
 CPDPRG2 waltz16  
 NUC2 1H  
 PCPD2 70.00 usec  
 PLW2 9.30000019 W  
 PLW12 0.18190999 W  
 PLW13 0.08913500 W  
 SFO2 600.1924008 MHz

F2 - Processing parameters  
 SI 32768  
 SF 150.9178637 MHz  
 WDW EM  
 SSB 0  
 LB 1.00 Hz  
 GB 0  
 PC 1.40

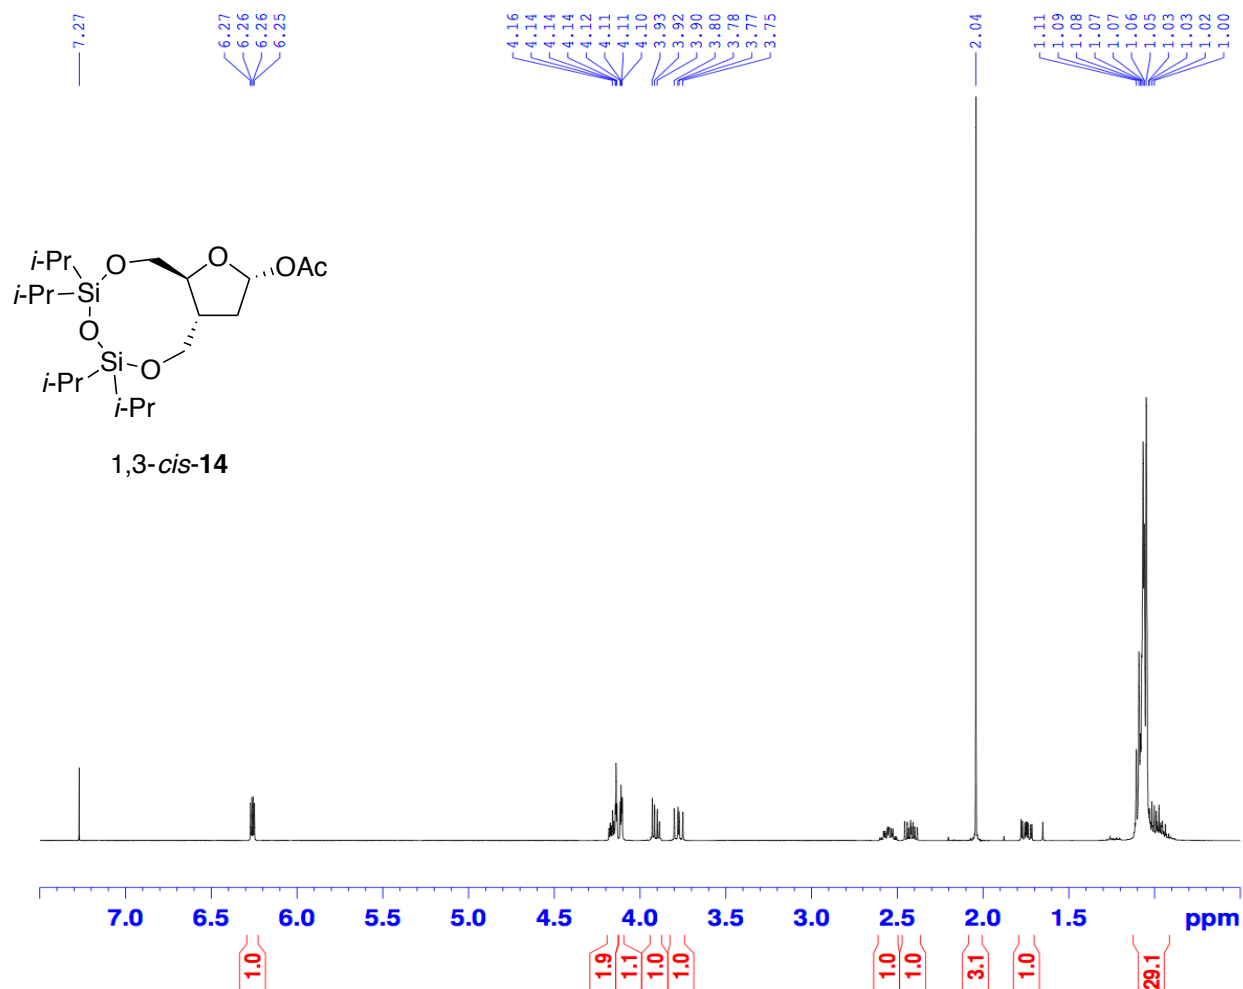

Current Data Parameters  
 NAME VIT-II-164-A  
 EXPNO 4  
 PROCNO 1

F2 - Acquisition Parameters  
 Date\_ 20111006  
 Time 21.54  
 INSTRUM spect  
 PROBHD 5 mm BBO BB-1H  
 PULPROG zg30  
 TD 65536  
 SOLVENT CDC13  
 NS 16  
 DS 2  
 SWH 8278.146 Hz  
 FIDRES 0.126314 Hz  
 AQ 3.9584243 sec  
 RG 90.5  
 DW 60.400 usec  
 DE 6.50 usec  
 TE 298.3 K  
 D1 2.00000000 sec  
 TD0 1

===== CHANNEL f1 =====  
 NUC1 1H  
 P1 8.10 usec  
 PL1 -5.00 dB  
 PL1W 31.77312851 W  
 SFO1 400.1324710 MHz

F2 - Processing parameters  
 SI 32768  
 SF 400.1300055 MHz  
 WDW no  
 SSB 0  
 LB 0 Hz  
 GB 0  
 PC 1.00

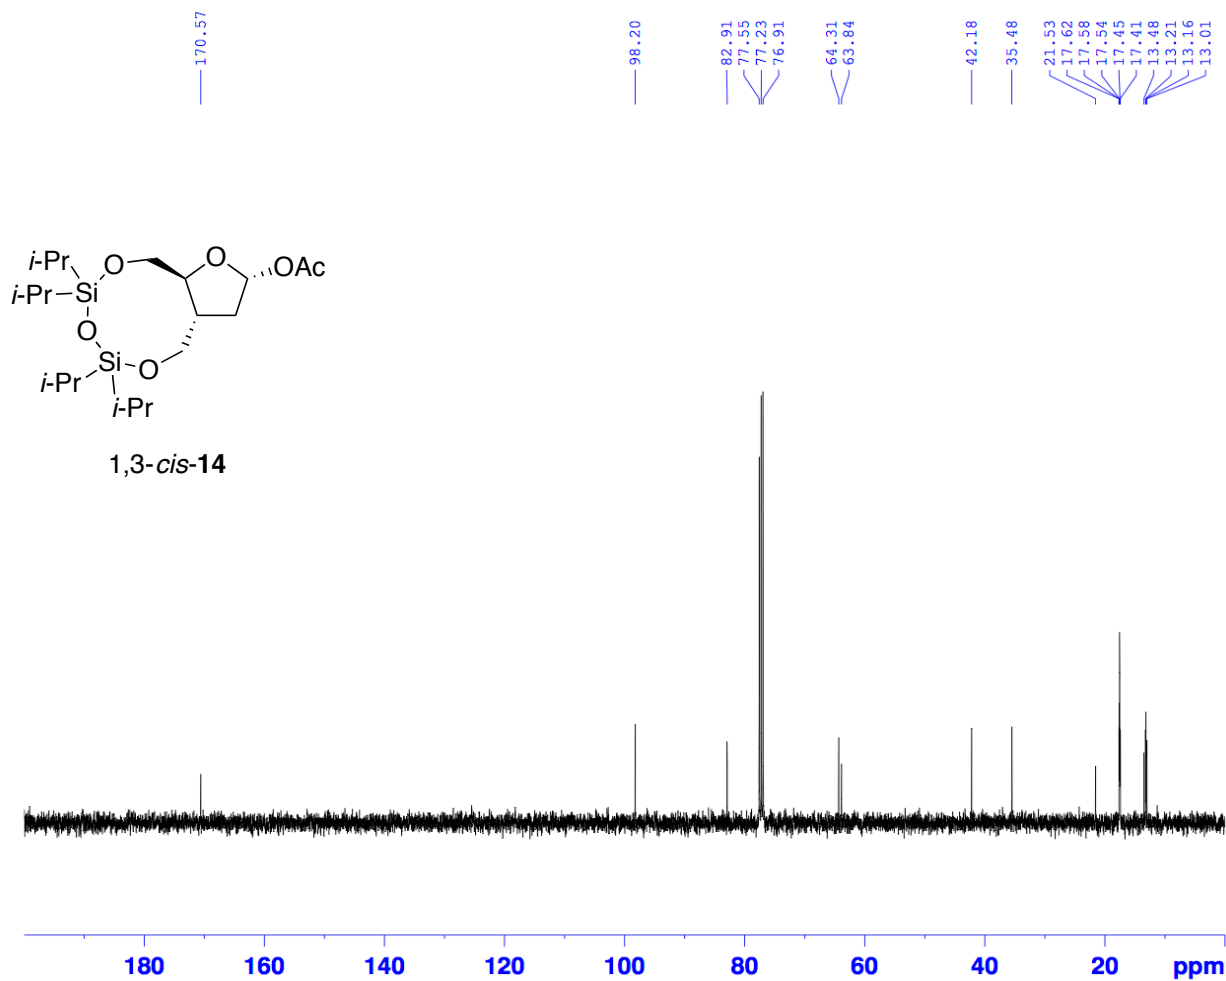

Current Data Parameters  
 NAME VIT-II-164-A  
 EXPNO 5  
 PROCNO 1

F2 - Acquisition Parameters  
 Date\_ 20111006  
 Time 21.55  
 INSTRUM spect  
 PROBHD 5 mm BBO BB-1H  
 PULPROG zgpg30  
 TD 65536  
 SOLVENT CDCl3  
 NS 32  
 DS 0  
 SWH 39920.160 Hz  
 FIDRES 0.609133 Hz  
 AQ 0.8208884 sec  
 RG 20642.5  
 DW 12.525 usec  
 DE 6.50 usec  
 TE 298.3 K  
 D1 2.50000000 sec  
 D11 0.03000000 sec  
 TD0 1

===== CHANNEL f1 =====  
 NUC1 13C  
 P1 6.50 usec  
 PL1 -4.00 dB  
 PL1W 25.23829460 W  
 SFO1 100.6228298 MHz

===== CHANNEL f2 =====  
 CPDPRG2 waltz16  
 NUC2 1H  
 PCPD2 70.00 usec  
 PL2 -5.00 dB  
 PL12 13.73 dB  
 PL13 13.73 dB  
 PL2W 31.77312851 W  
 PL12W 0.42565724 W  
 PL13W 0.42565724 W  
 SFO2 400.1316005 MHz

F2 - Processing parameters  
 SI 32768  
 SF 100.6127479 MHz  
 WDW EM  
 SSB 0  
 LB 1.20 Hz  
 GB 0  
 PC 1.40

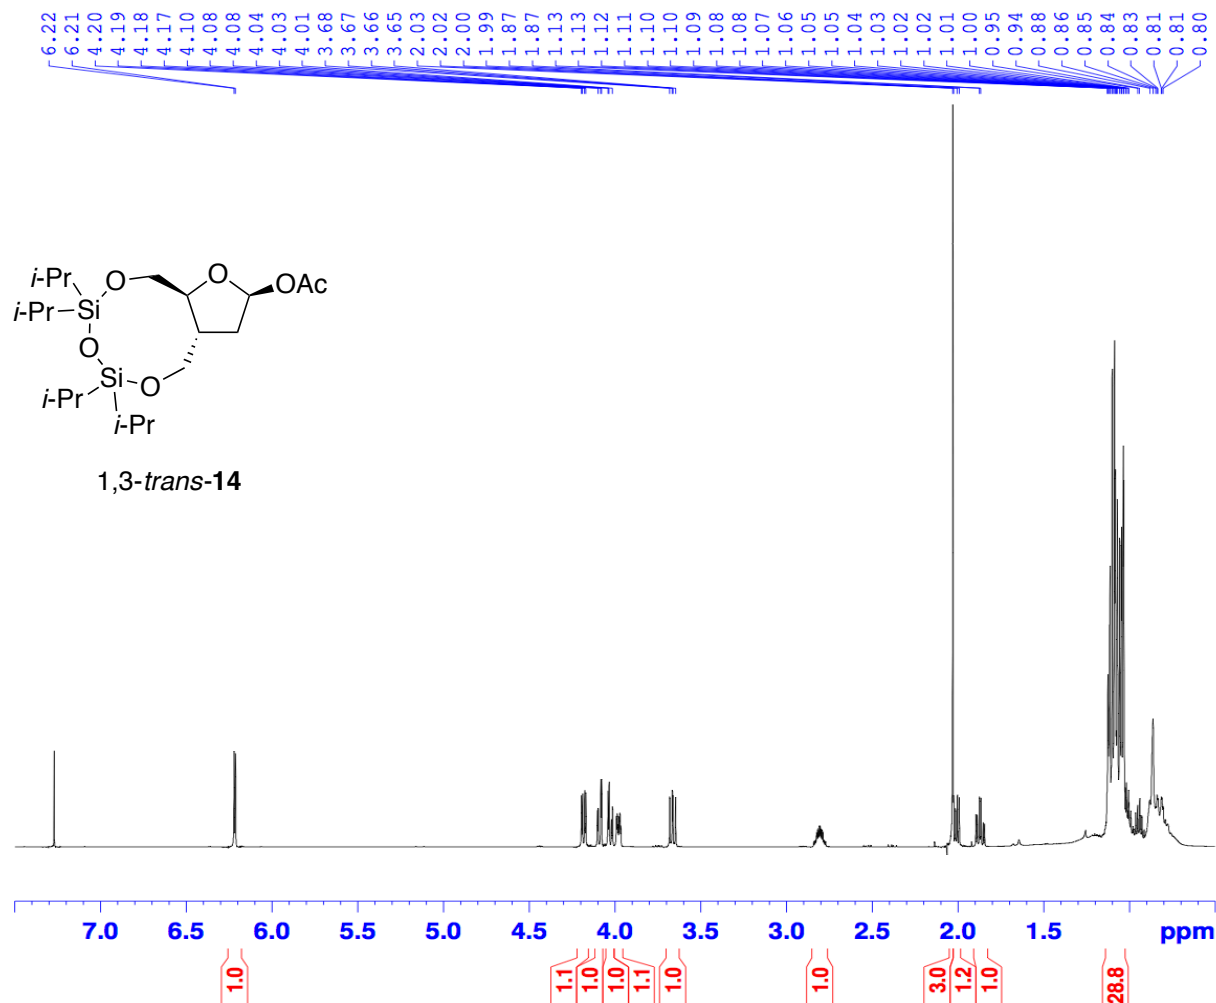

Current Data Parameters  
 NAME VIT-IV-31-B  
 EXPNO 1  
 PROCNO 1

F2 - Acquisition Parameters  
 Date\_ 20121012  
 Time 11.08  
 INSTRUM spect  
 PROBHD 5 mm PAQXI 1H/  
 PULPROG zg30  
 TD 65536  
 SOLVENT CDC13  
 NS 8  
 DS 0  
 SWH 12335.526 Hz  
 FIDRES 0.188225 Hz  
 AQ 2.6564426 sec  
 RG 33.59  
 DW 40.533 usec  
 DE 6.50 usec  
 TE 298.2 K  
 D1 2.00000000 sec  
 TD0 1

===== CHANNEL f1 =====  
 NUC1 1H  
 P1 9.79 usec  
 PLW1 9.30000019 W  
 SFO1 600.1937064 MHz

F2 - Processing parameters  
 SI 65536  
 SF 600.1900090 MHz  
 WDW EM  
 SSB 0  
 LB 0.30 Hz  
 GB 0  
 PC 1.00

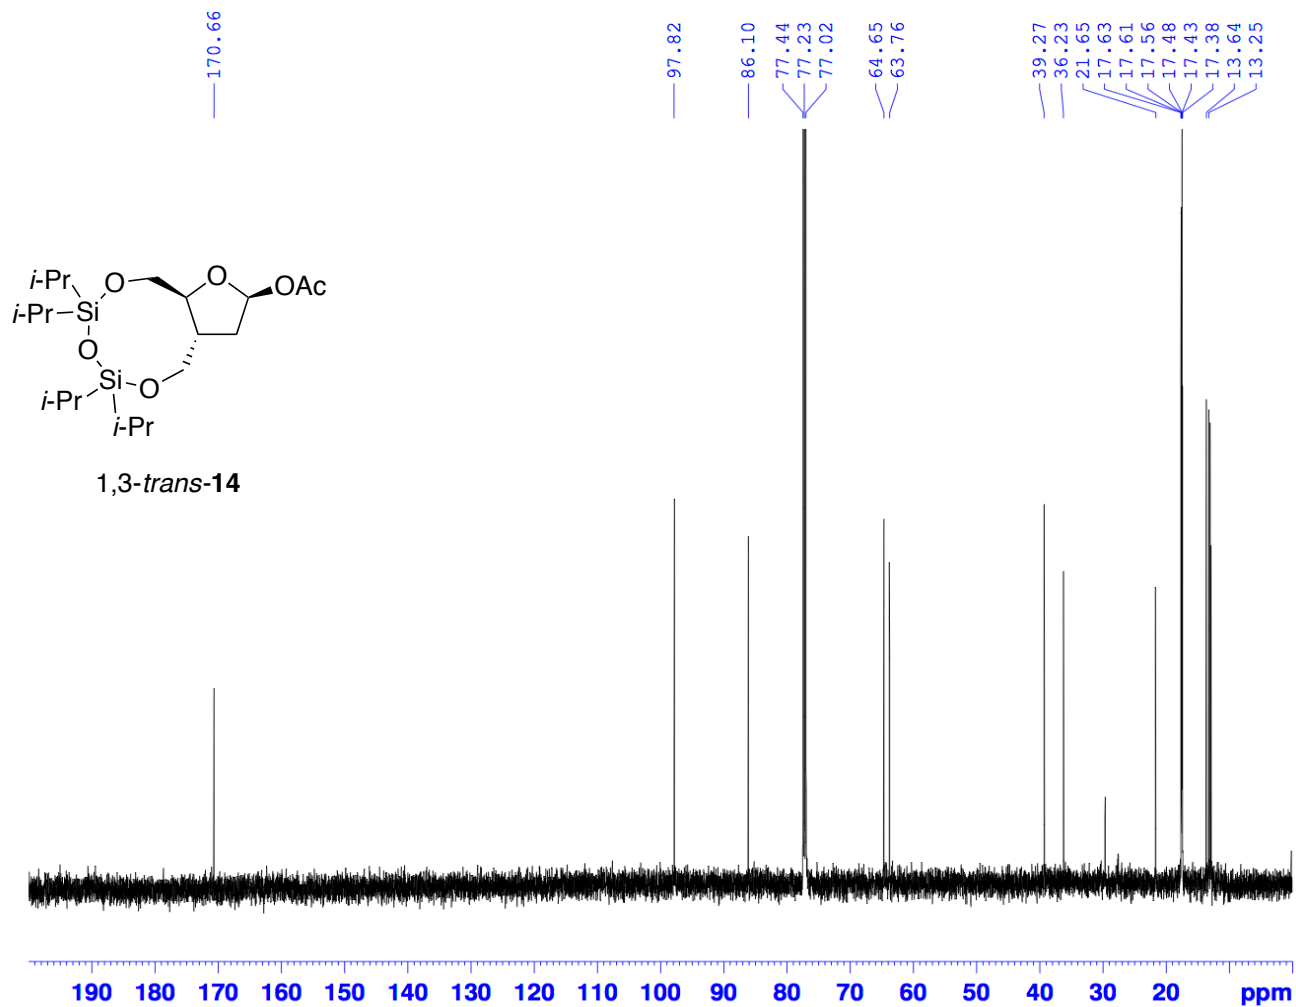

Current Data Parameters  
 NAME VTT-IV-31-B  
 EXPNO 2  
 PROCNO 1

F2 - Acquisition Parameters  
 Date\_ 20121012  
 Time 13.07  
 INSTRUM spect  
 PROBHD 5 mm PAQXI 1H/  
 PULPROG zgpg30  
 TD 65536  
 SOLVENT CDCl3  
 NS 128  
 DS 0  
 SWH 36057.691 Hz  
 FIDRES 0.550197 Hz  
 AQ 0.9088159 sec  
 RG 184.65  
 DW 13.867 usec  
 DE 6.50 usec  
 TE 298.2 K  
 D1 2.50000000 sec  
 D11 0.03000000 sec  
 TD0 1

===== CHANNEL f1 =====  
 NUC1 13C  
 P1 15.00 usec  
 PLW1 106.00000000 W  
 SFO1 150.9329866 MHz

===== CHANNEL f2 =====  
 CPDPRG2 waltz16  
 NUC2 1H  
 PCPD2 70.00 usec  
 PLW2 9.30000019 W  
 PLW12 0.18190999 W  
 PLW13 0.08913500 W  
 SFO2 600.1924008 MHz

F2 - Processing parameters  
 SI 32768  
 SF 150.9178644 MHz  
 WDW EM  
 SSB 0  
 LB 1.00 Hz  
 GB 0  
 PC 1.40



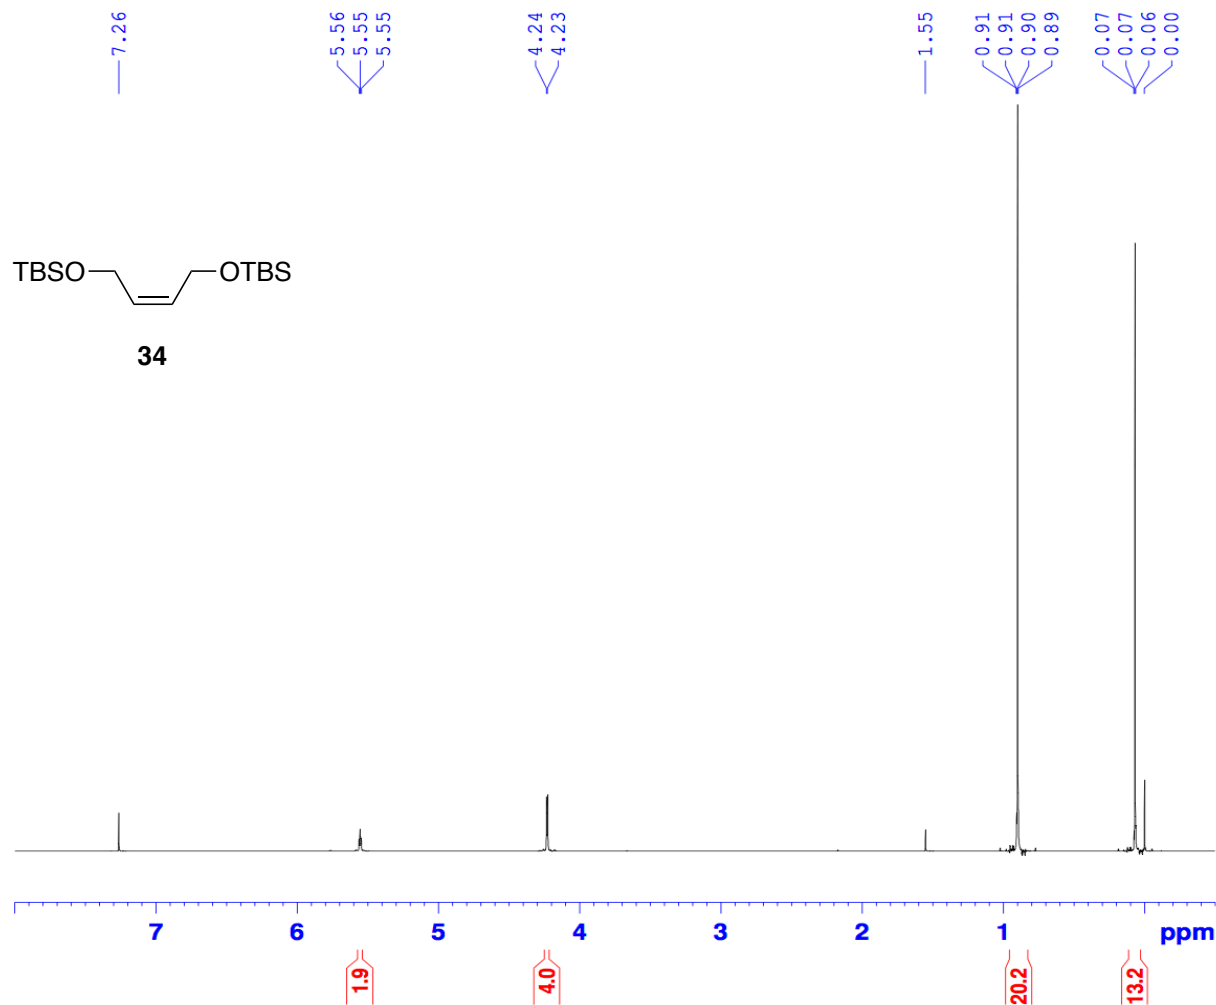

Current Data Parameters  
 NAME VIT-IV-34-A  
 EXPNO 2  
 PROCNO 1

F2 - Acquisition Parameters  
 Date\_ 20121107  
 Time 13.54  
 INSTRUM spect  
 PROBHD 5 mm BBO BB-1H  
 PULPROG zg30  
 TD 65536  
 SOLVENT CDCl3  
 NS 8  
 DS 0  
 SWH 10330.578 Hz  
 FIDRES 0.157632 Hz  
 AQ 3.1719923 sec  
 RG 228.1  
 DW 48.400 usec  
 DE 6.50 usec  
 TE 298.2 K  
 D1 2.00000000 sec  
 TD0 1

===== CHANNEL f1 =====  
 NUC1 1H  
 P1 9.20 usec  
 PL1 -3.00 dB  
 PL1W 37.58904266 W  
 SFO1 500.2020889 MHz

F2 - Processing parameters  
 SI 32768  
 SF 500.1990143 MHz  
 WDW EM  
 SSB 0  
 LB 0.30 Hz  
 GB 0  
 PC 1.00

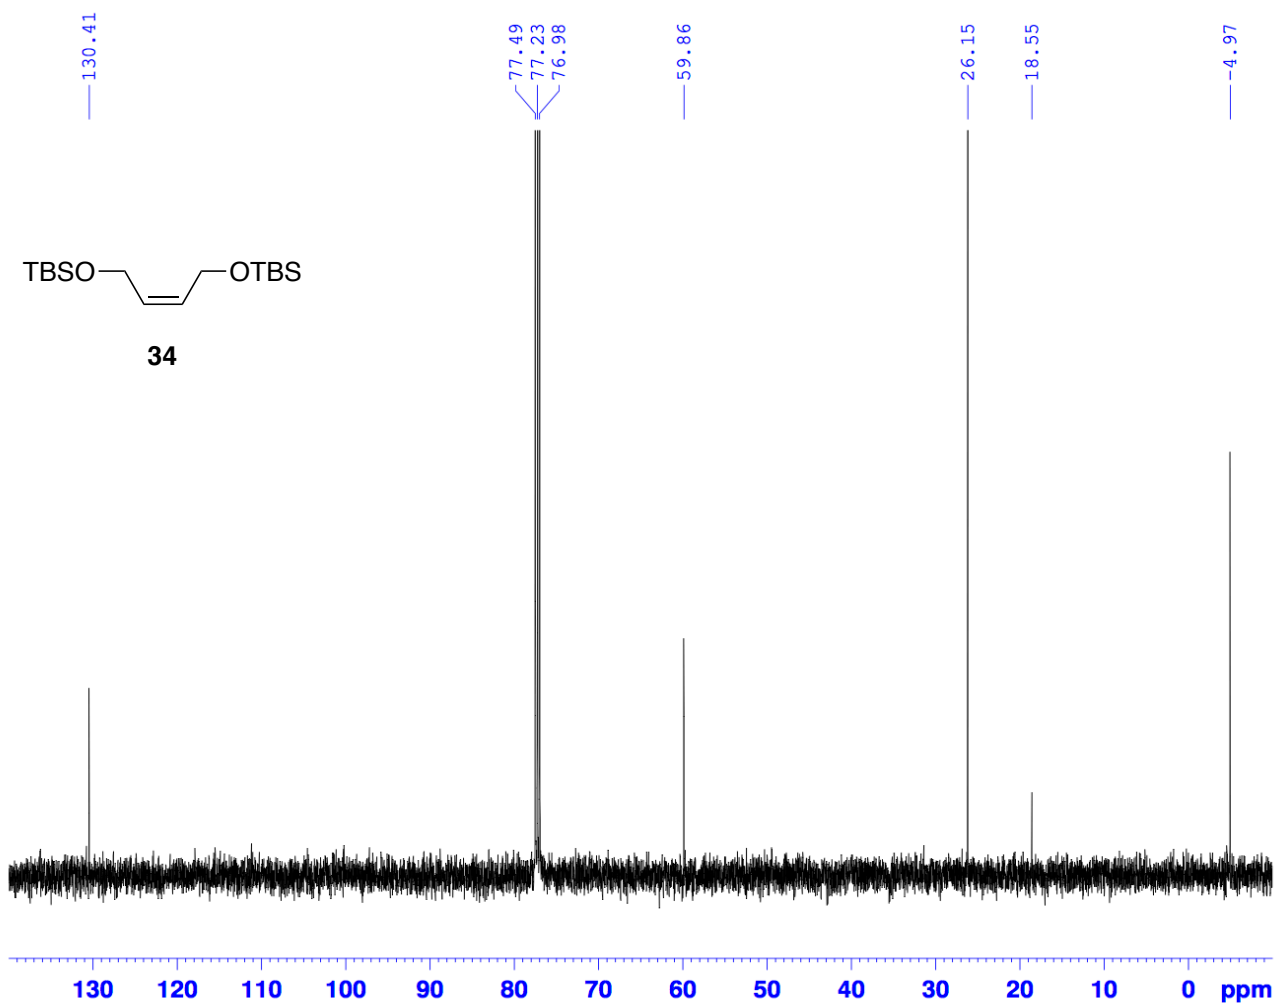

Current Data Parameters  
 NAME VTT-IV-34-A  
 EXPNO 3  
 PROCNO 1

F2 - Acquisition Parameters  
 Date\_ 20121107  
 Time 13.57  
 INSTRUM spect  
 PROBHD 5 mm BBO BB-1H  
 PULPROG zgpg30  
 TD 65536  
 SOLVENT CDCl3  
 NS 98  
 DS 0  
 SWH 30030.029 Hz  
 FIDRES 0.458222 Hz  
 AQ 1.0912244 sec  
 RG 32768  
 DW 16.650 usec  
 DE 6.50 usec  
 TE 298.3 K  
 D1 2.0000000 sec  
 D11 0.0300000 sec  
 TD0 1

===== CHANNEL f1 =====  
 NUC1 13C  
 P1 9.75 usec  
 PL1 2.00 dB  
 PL1W 49.29017639 W  
 SFO1 125.7677161 MHz

===== CHANNEL f2 =====  
 CPDPRG2 waltz16  
 NUC2 1H  
 PCPD2 70.00 usec  
 PL2 -3.00 dB  
 PL12 13.50 dB  
 PL13 13.50 dB  
 PL2W 37.58904266 W  
 PL12W 0.84151381 W  
 PL13W 0.84151381 W  
 SFO2 500.2010008 MHz

F2 - Processing parameters  
 SI 32768  
 SF 125.7751116 MHz  
 WDW EM  
 SSB 0  
 LB 1.00 Hz  
 GB 0  
 PC 1.40



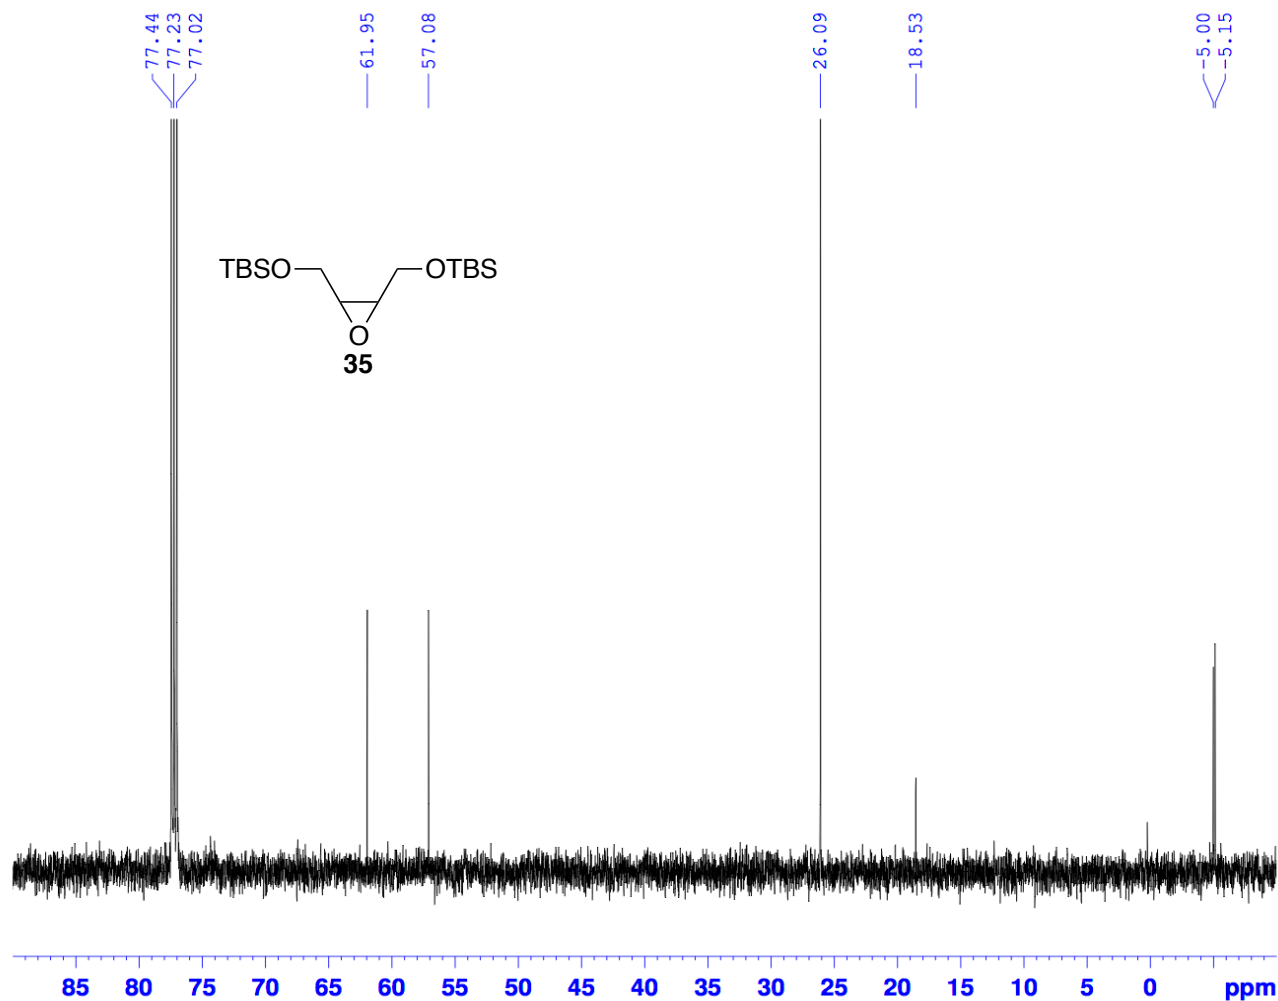

Current Data Parameters  
 NAME VTT-IV-36-A  
 EXPNO 2  
 PROCNO 1

F2 - Acquisition Parameters  
 Date\_ 20121109  
 Time 11.38  
 INSTRUM spect  
 PROBHD 5 mm PAQXI 1H/  
 PULPROG zgpg30  
 TD 65536  
 SOLVENT CDCl3  
 NS 128  
 DS 0  
 SWH 36057.691 Hz  
 FIDRES 0.550197 Hz  
 AQ 0.9088159 sec  
 RG 184.65  
 DW 13.867 usec  
 DE 6.50 usec  
 TE 298.2 K  
 D1 2.0000000 sec  
 D11 0.0300000 sec  
 TD0 1

===== CHANNEL f1 =====  
 NUC1 13C  
 P1 15.00 usec  
 PLW1 106.0000000 W  
 SFO1 150.9216024 MHz

===== CHANNEL f2 =====  
 CPDPRG2 waltz16  
 NUC2 1H  
 PCPD2 70.00 usec  
 PLW2 9.30000019 W  
 PLW12 0.18190999 W  
 PLW13 0.08913500 W  
 SFO2 600.1924008 MHz

F2 - Processing parameters  
 SI 32768  
 SF 150.9178628 MHz  
 WDW EM  
 SSB 0  
 LB 1.00 Hz  
 GB 0  
 PC 1.40

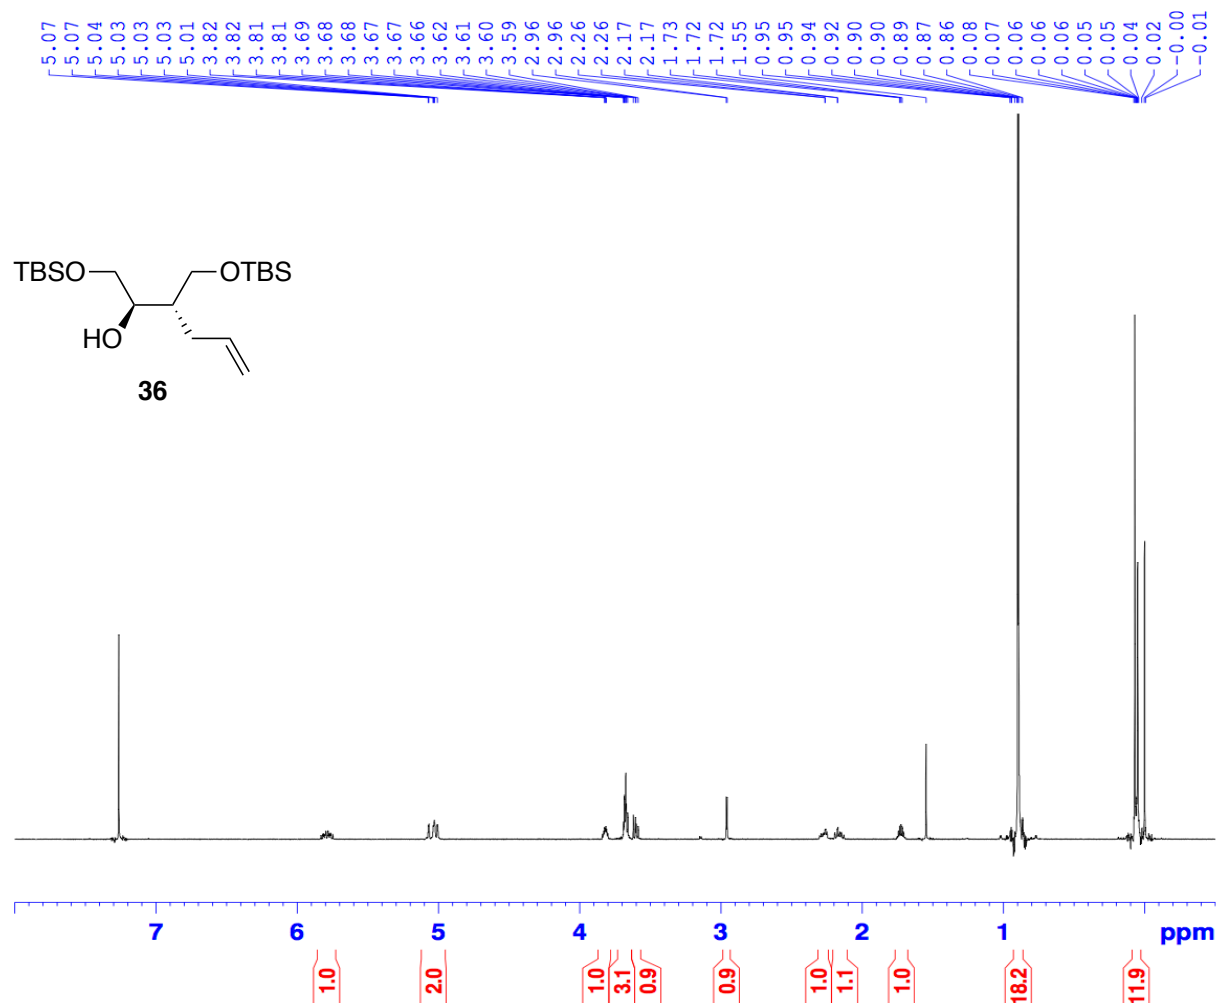

Current Data Parameters  
NAME VIT-IV-40-A  
EXPNO 1  
PROCNO 1

F2 - Acquisition Parameters  
Date\_ 20121115  
Time 11.47  
INSTRUM spect  
PROBHD 5 mm BBO BB-1H  
PULPROG zg30  
TD 65536  
SOLVENT CDCl3  
NS 8  
DS 0  
SWH 10330.578 Hz  
FIDRES 0.157632 Hz  
AQ 3.1719923 sec  
RG 512  
DW 48.400 usec  
DE 6.50 usec  
TE 298.1 K  
D1 1.50000000 sec  
TD0 1

===== CHANNEL f1 =====  
NUC1 1H  
P1 9.20 usec  
PL1 -3.00 dB  
PL1W 37.58904266 W  
SFO1 500.2020889 MHz

F2 - Processing parameters  
SI 32768  
SF 500.1990141 MHz  
WDW EM  
SSB 0  
LB 0.30 Hz  
GB 0  
PC 1.00









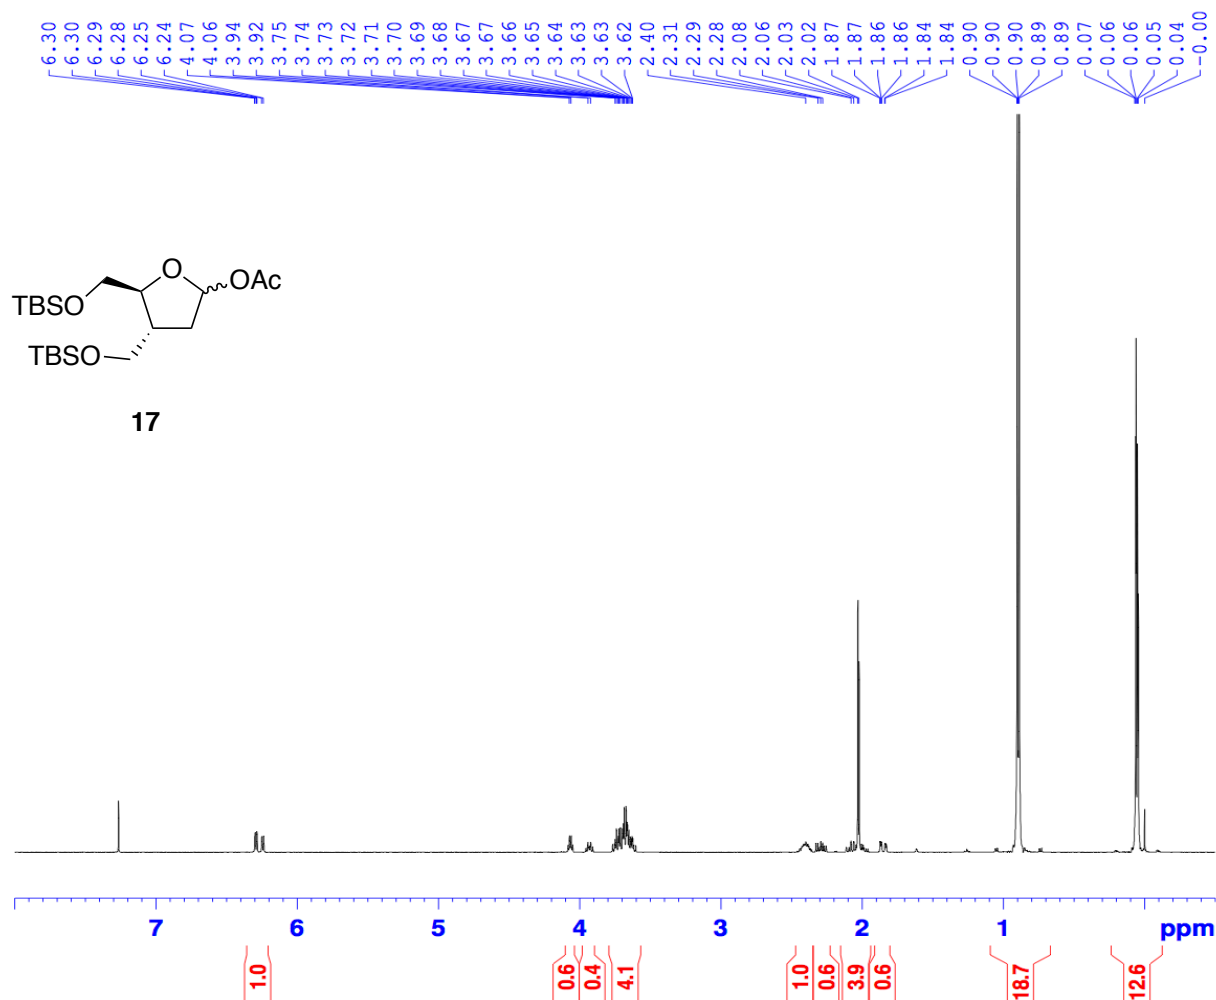

Current Data Parameters  
NAME VIT-II-180-A  
EXPNO 1  
PROCNO 1

F2 - Acquisition Parameters  
Date\_ 2011022  
Time 23.24  
INSTRUM spect  
PROBHD 5 mm BBO BB-1H  
PULPROG zg30  
TD 65536  
SOLVENT CDCl3  
NS 16  
DS 2  
SWH 8278.146 Hz  
FIDRES 0.126314 Hz  
AQ 3.9584243 sec  
RG 90.5  
DW 60.400 usec  
DE 6.50 usec  
TE 298.2 K  
D1 2.00000000 sec  
TD0 1

===== CHANNEL f1 =====  
NUC1 1H  
P1 8.10 usec  
PL1 -5.00 dB  
PL1W 31.77312851 W  
SFO1 400.1324710 MHz

F2 - Processing parameters  
SI 32768  
SF 400.1300073 MHz  
WDW EM  
SSB 0  
LB 0.30 Hz  
GB 0  
PC 1.00

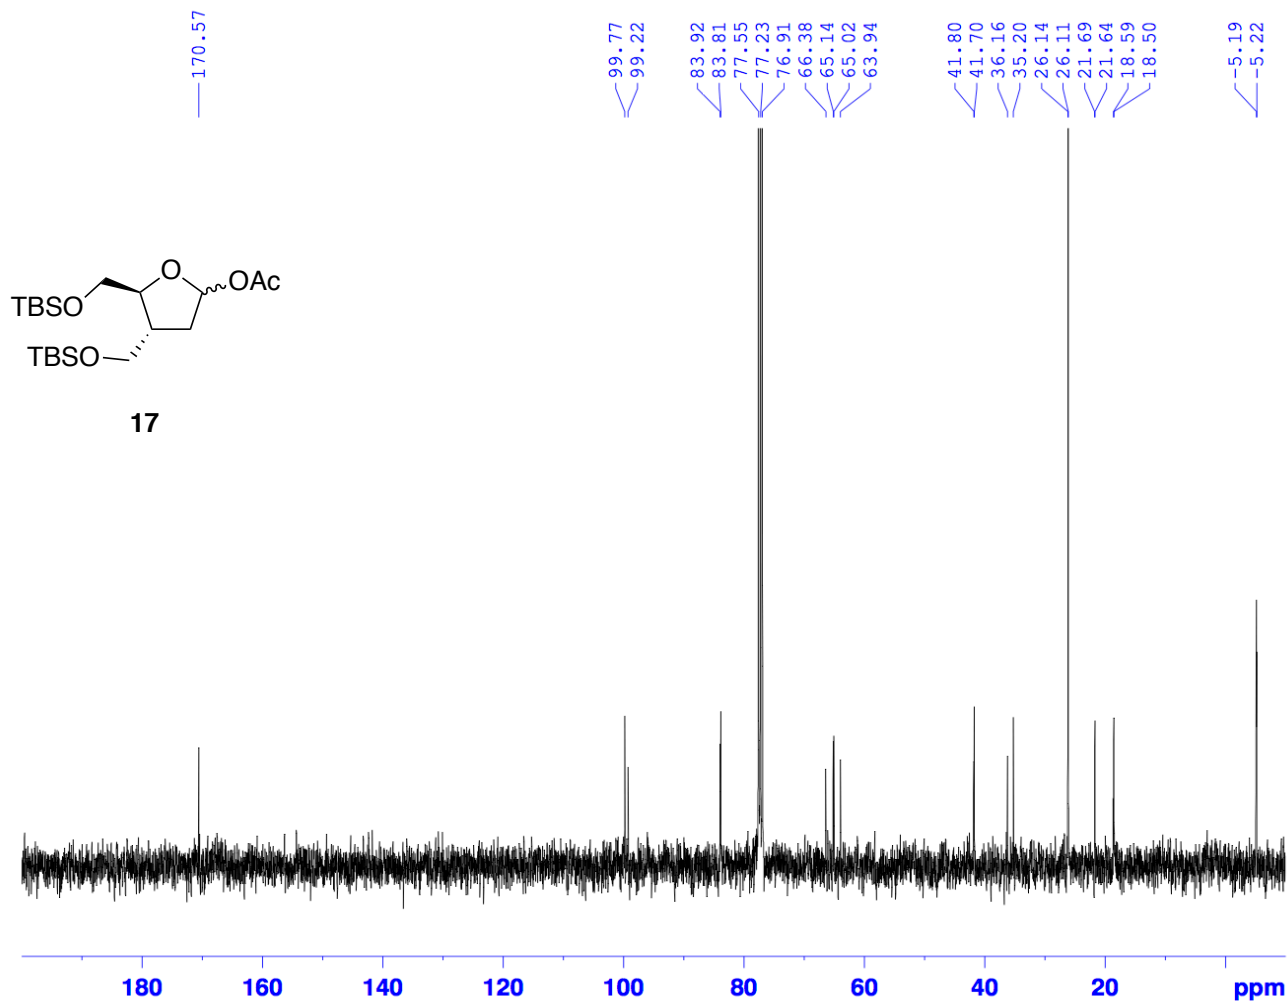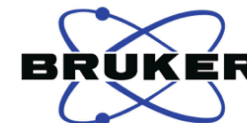

Current Data Parameters  
 NAME VIT-II-180-A  
 EXPNO 2  
 PROCNO 1

F2 - Acquisition Parameters  
 Date\_ 20111022  
 Time 23.27  
 INSTRUM spect  
 PROBHD 5 mm BBO BB-1H  
 PULPROG zgpg30  
 TD 65536  
 SOLVENT CDCl3  
 NS 128  
 DS 4  
 SWH 23980.814 Hz  
 FIDRES 0.365918 Hz  
 AQ 1.3664756 sec  
 RG 20642.5  
 DW 20.850 usec  
 DE 6.50 usec  
 TE 298.2 K  
 D1 2.50000000 sec  
 D11 0.03000000 sec  
 TD0 1

===== CHANNEL f1 =====  
 NUC1 13C  
 P1 6.50 usec  
 PL1 -4.00 dB  
 PL1W 25.23829460 W  
 SFO1 100.6228298 MHz

===== CHANNEL f2 =====  
 CPDPRG2 waltz16  
 NUC2 1H  
 PCPD2 70.00 usec  
 PL2 -5.00 dB  
 PL12 13.73 dB  
 PL13 13.73 dB  
 PL2W 31.77312851 W  
 PL12W 0.42565724 W  
 PL13W 0.42565724 W  
 SFO2 400.1316005 MHz

F2 - Processing parameters  
 SI 32768  
 SF 100.6127472 MHz  
 WDW EM  
 SSB 0  
 LB 2.00 Hz  
 GB 0  
 PC 1.40

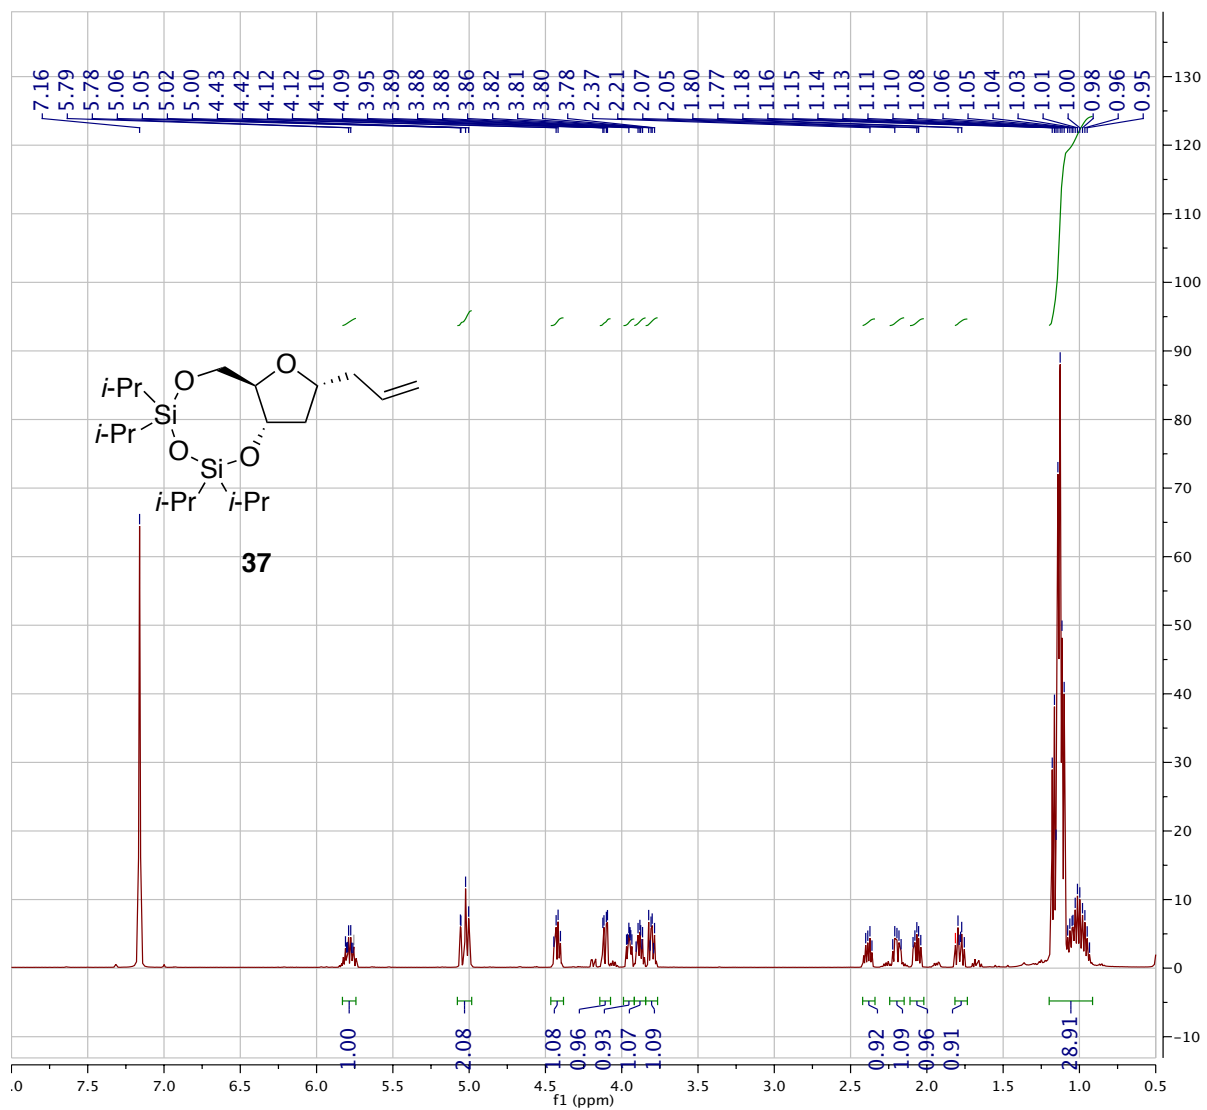

| Parameter                    | Value                                                  |
|------------------------------|--------------------------------------------------------|
| 1 Solvent                    | CDCl3                                                  |
| 2 Temperature                | 298.0                                                  |
| 3 Pulse Sequence             | zg30                                                   |
| 4 Experiment                 | 1D                                                     |
| 5 Probe                      | 5 mm CPTCI<br>1H-13C/ 15N/<br>2H Z-GRD<br>Z44881/ 0020 |
| 6 Number of Scans            | 8                                                      |
| 7 Receiver Gain              | 4                                                      |
| 8 Relaxation Delay           | 0.1000                                                 |
| 9 Pulse Width                | 7.5000                                                 |
| 10 Spectrometer<br>Frequency | 500.22                                                 |
| 11 Spectral Width            | 8012.8                                                 |
| 12 Lowest Frequency          | -505.0                                                 |
| 13 Nucleus                   | 1H                                                     |
| 14 Acquired Size             | 40864                                                  |
| 15 Spectral Size             | 131072                                                 |

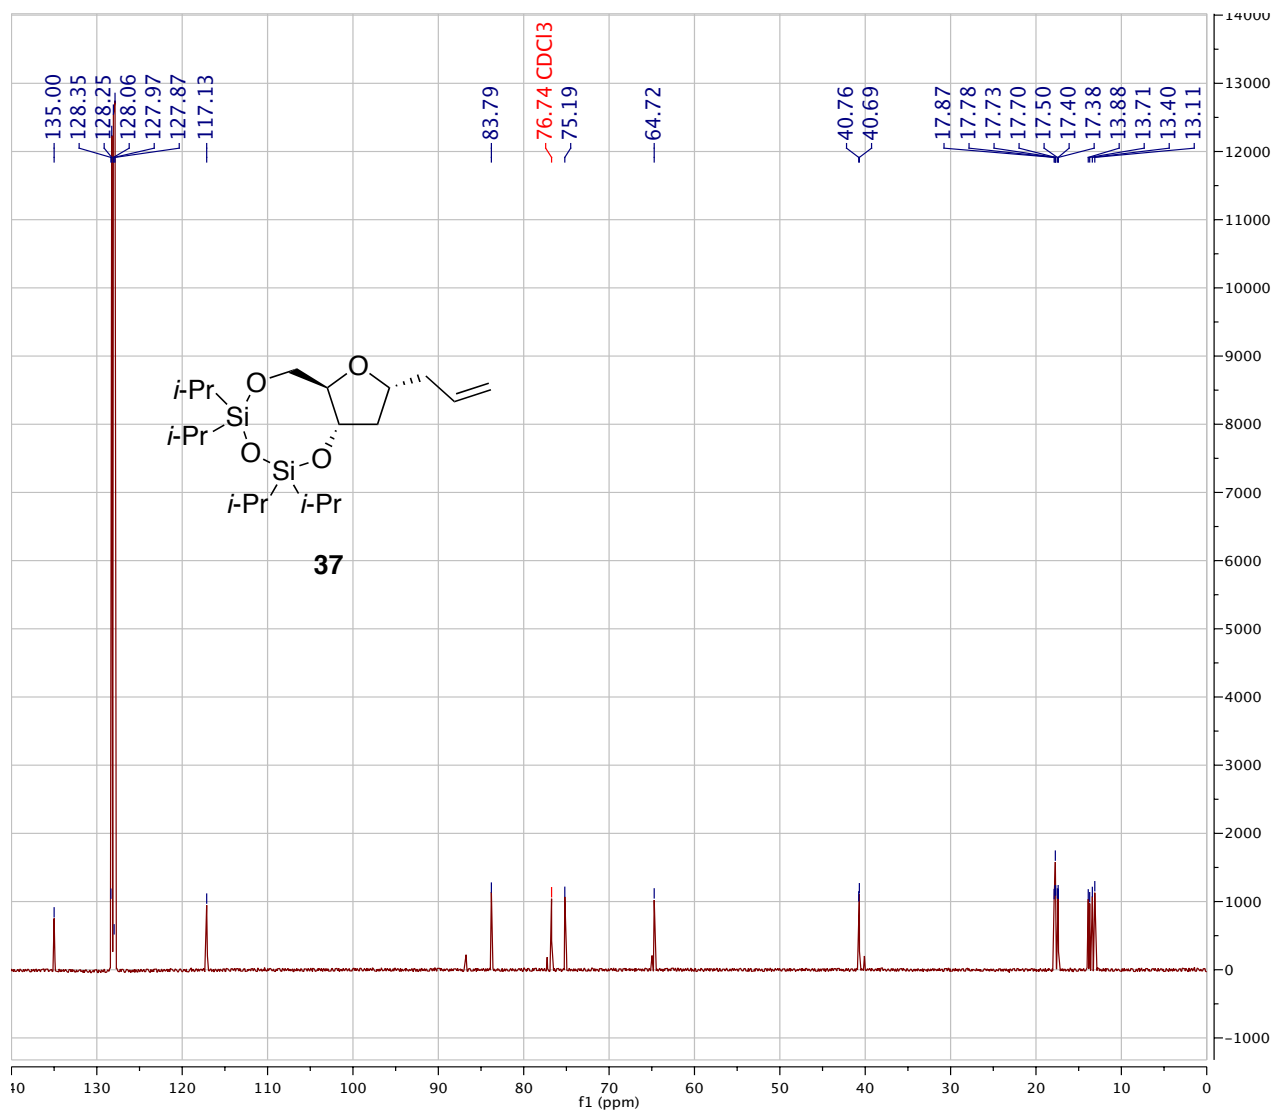

| Parameter                 | Value                                         |
|---------------------------|-----------------------------------------------|
| 1 Solvent                 | CDCl <sub>3</sub>                             |
| 2 Temperature             | 298.0                                         |
| 3 Pulse Sequence          | SpinEchopg30 gp.prd                           |
| 4 Experiment              | 1D                                            |
| 5 Probe                   | 5 mm CPTCI 1H-13C/ 15N/ 2H Z-GRD Z44881/ 0020 |
| 6 Number of Scans         | 138                                           |
| 7 Receiver Gain           | 5161                                          |
| 8 Relaxation Delay        | 0.2500                                        |
| 9 Pulse Width             | 15.5000                                       |
| 10 Spectrometer Frequency | 125.79                                        |
| 11 Spectral Width         | 30303.0                                       |
| 12 Lowest Frequency       | -1268.5                                       |
| 13 Nucleus                | 13C                                           |
| 14 Acquired Size          | 32768                                         |
| 15 Spectral Size          | 65536                                         |

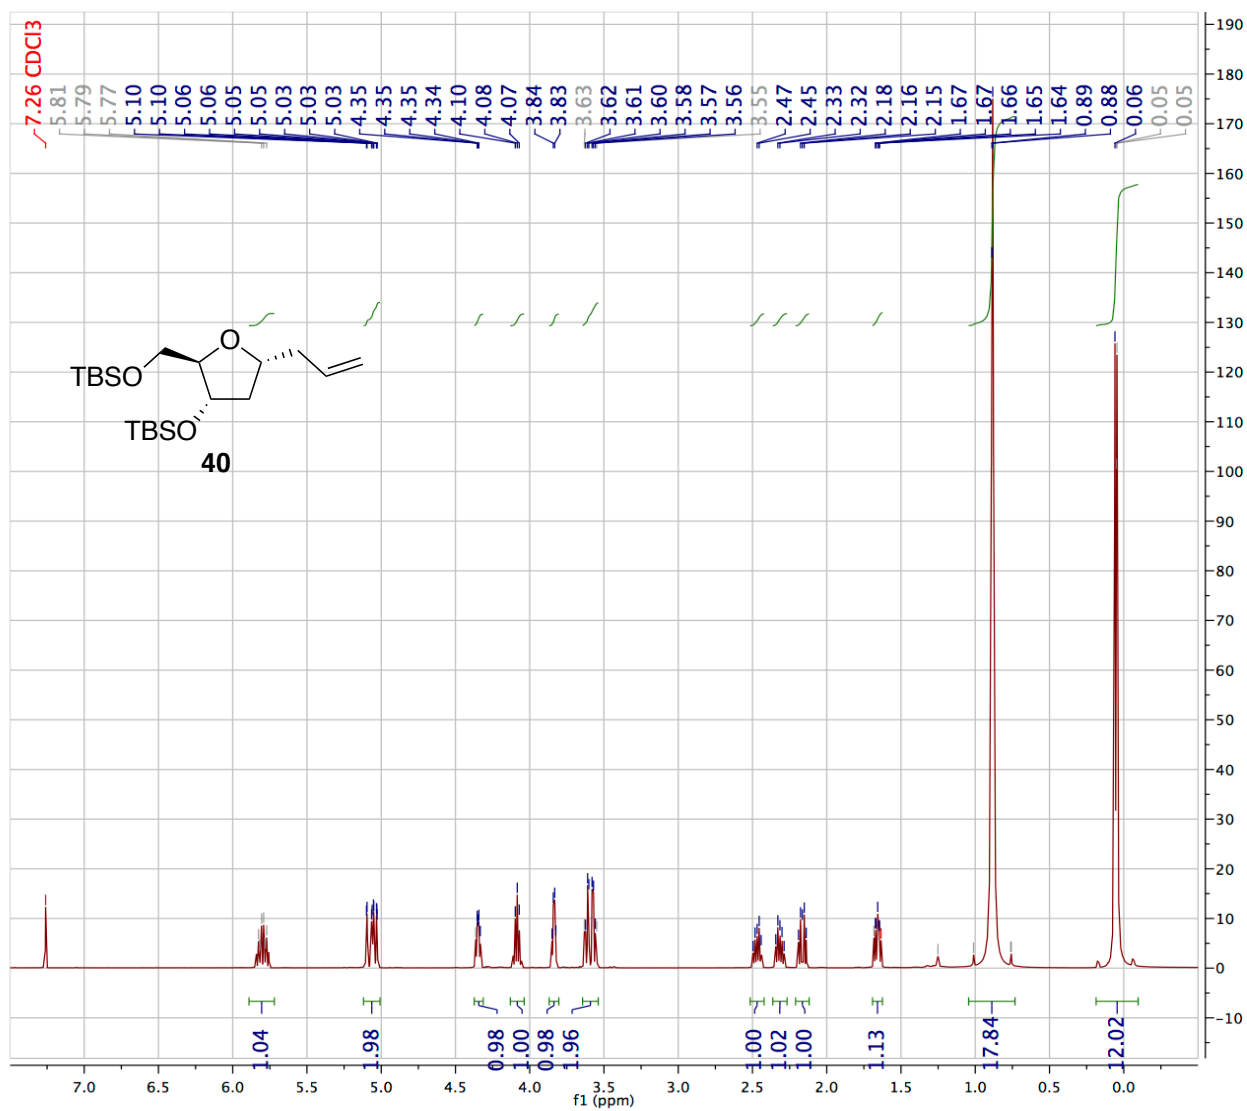

| Parameter                    | Value                                                            |
|------------------------------|------------------------------------------------------------------|
| 1 Solvent                    | CDCl <sub>3</sub>                                                |
| 2 Temperature                | 298.0                                                            |
| 3 Pulse Sequence             | zg30                                                             |
| 4 Experiment                 | 1D                                                               |
| 5 Probe                      | 5 mm<br>CPTCI<br>1H-13C/<br>15N/ 2H Z-<br>GRD<br>Z44881/<br>0020 |
| 6 Number of Scans            | 8                                                                |
| 7 Receiver Gain              | 3                                                                |
| 8 Relaxation Delay           | 0.1000                                                           |
| 9 Pulse Width                | 7.5000                                                           |
| 10 Spectrometer<br>Frequency | 500.22                                                           |
| 11 Spectral Width            | 8012.8                                                           |
| 12 Lowest<br>Frequency       | -536.3                                                           |
| 13 Nucleus                   | 1H                                                               |
| 14 Acquired Size             | 40864                                                            |
| 15 Spectral Size             | 131072                                                           |

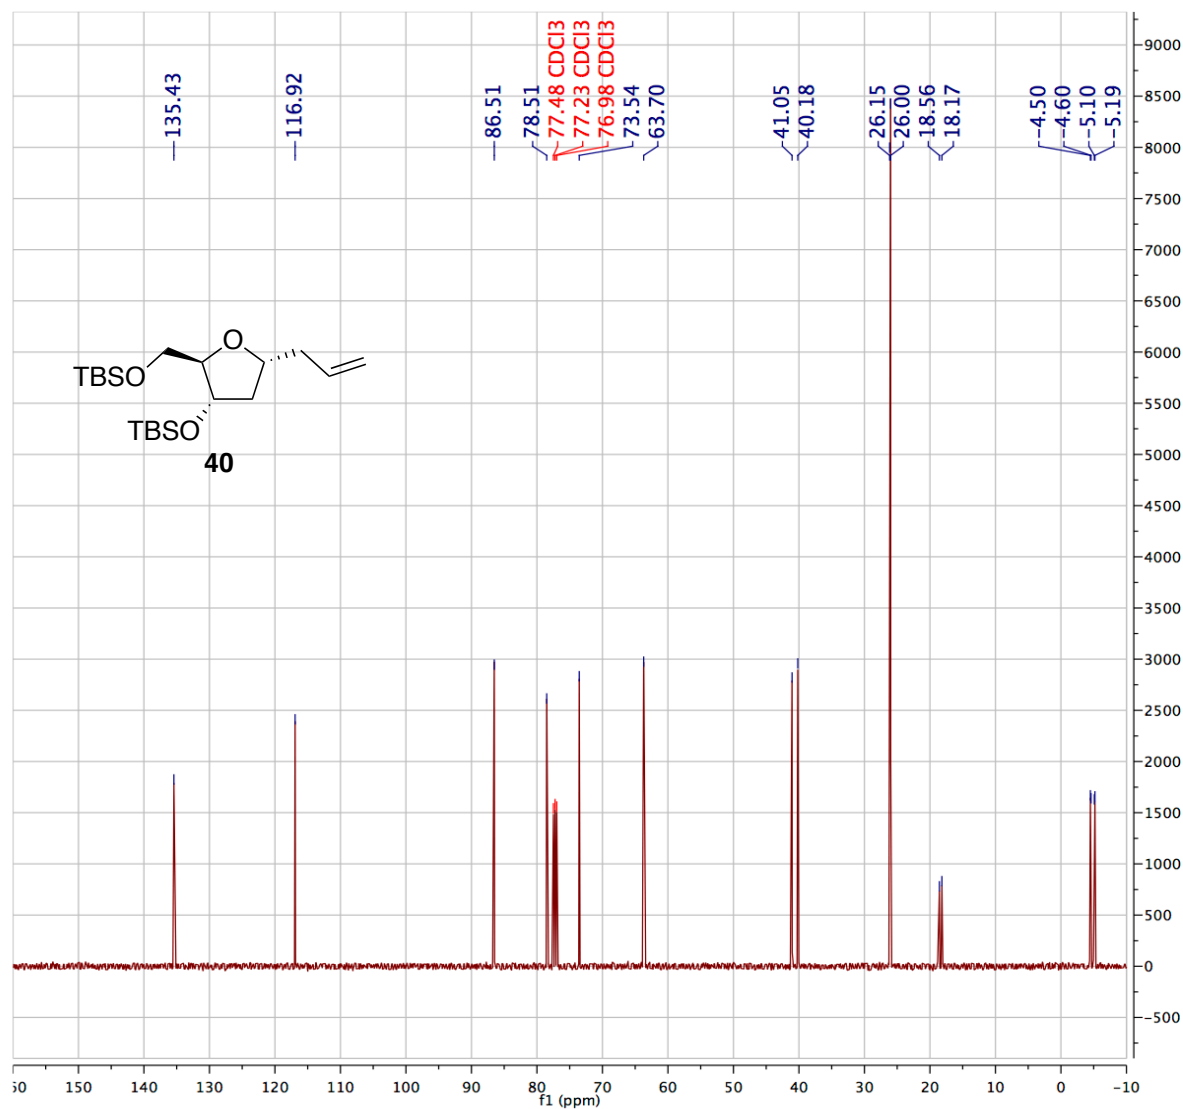

| Parameter                 | Value                                               |
|---------------------------|-----------------------------------------------------|
| 1 Solvent                 | CDCl3                                               |
| 2 Temperature             | 298.0                                               |
| 3 Pulse Sequence          | SpinEchopg30gp.prd                                  |
| 4 Experiment              | 1D                                                  |
| 5 Probe                   | 5 mm CPTCI 1H-13C/<br>15N/ 2H Z-GRD<br>Z44881/ 0020 |
| 6 Number of Scans         | 92                                                  |
| 7 Receiver Gain           | 8192                                                |
| 8 Relaxation Delay        | 0.2500                                              |
| 9 Pulse Width             | 15.5000                                             |
| 10 Spectrometer Frequency | 125.79                                              |
| 11 Spectral Width         | 30303.0                                             |
| 12 Lowest Frequency       | -1294.0                                             |
| 13 Nucleus                | 13C                                                 |
| 14 Acquired Size          | 32768                                               |
| 15 Spectral Size          | 65536                                               |

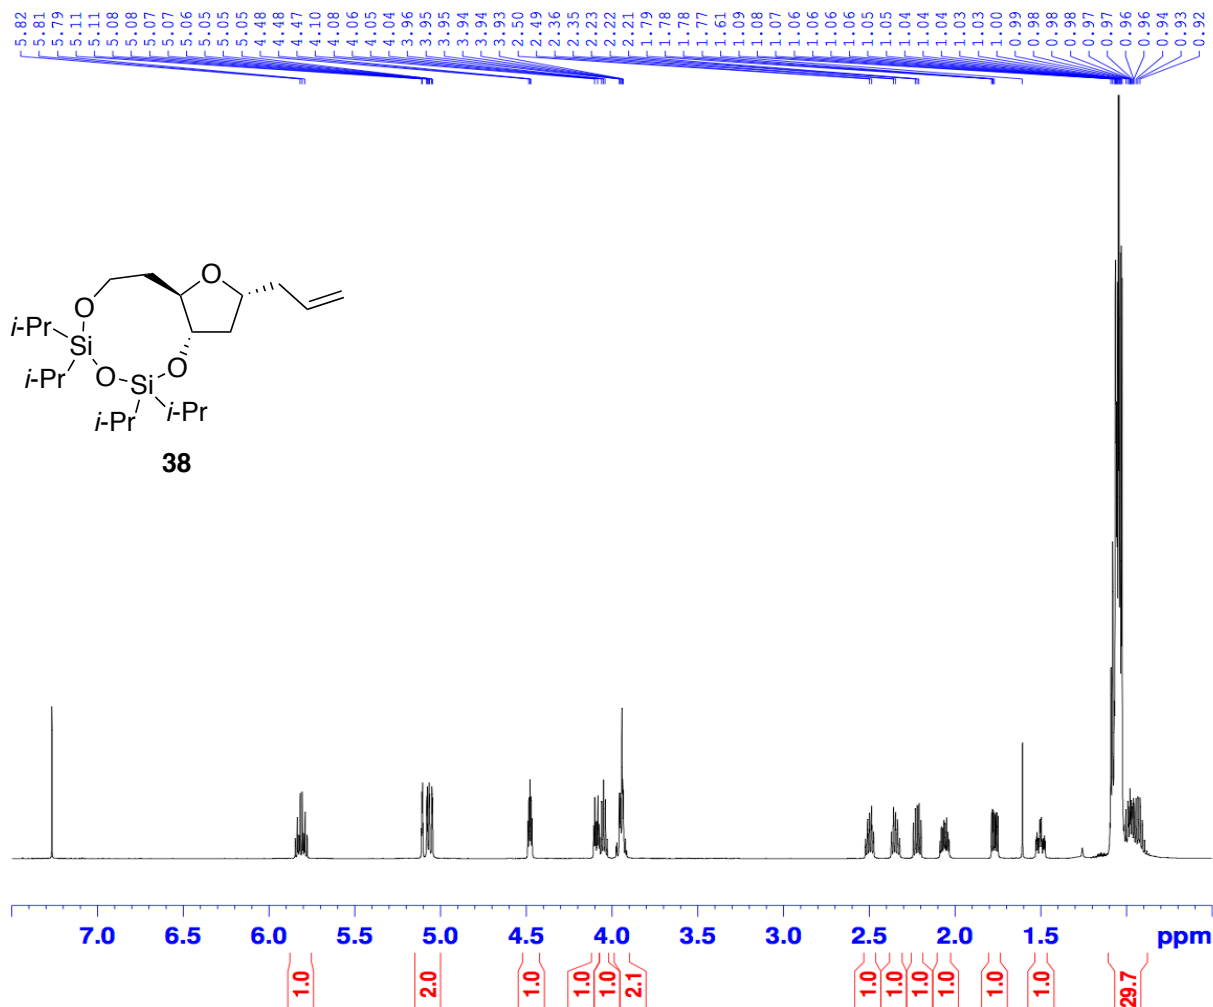

Current Data Parameters  
 NAME VIT-III-153-A  
 EXPNO 1  
 PROCNO 1

F2 - Acquisition Parameters  
 Date\_ 20120622  
 Time 20.19  
 INSTRUM spect  
 PROBHD 5 mm PAQXI 1H/  
 PULPROG zg30  
 TD 65536  
 SOLVENT CDCl3  
 NS 8  
 DS 0  
 SWH 12335.526 Hz  
 FIDRES 0.188225 Hz  
 AQ 2.6564426 sec  
 RG 68.89  
 DW 40.533 usec  
 DE 6.50 usec  
 TE 298.2 K  
 D1 2.00000000 sec  
 TD0 1

===== CHANNEL f1 =====  
 NUC1 1H  
 P1 9.79 usec  
 PLW1 9.30000019 W  
 SFO1 600.1937064 MHz

F2 - Processing parameters  
 SI 65536  
 SF 600.1900118 MHz  
 WDW EM  
 SSB 0  
 LB 0.30 Hz  
 GB 0  
 PC 1.00

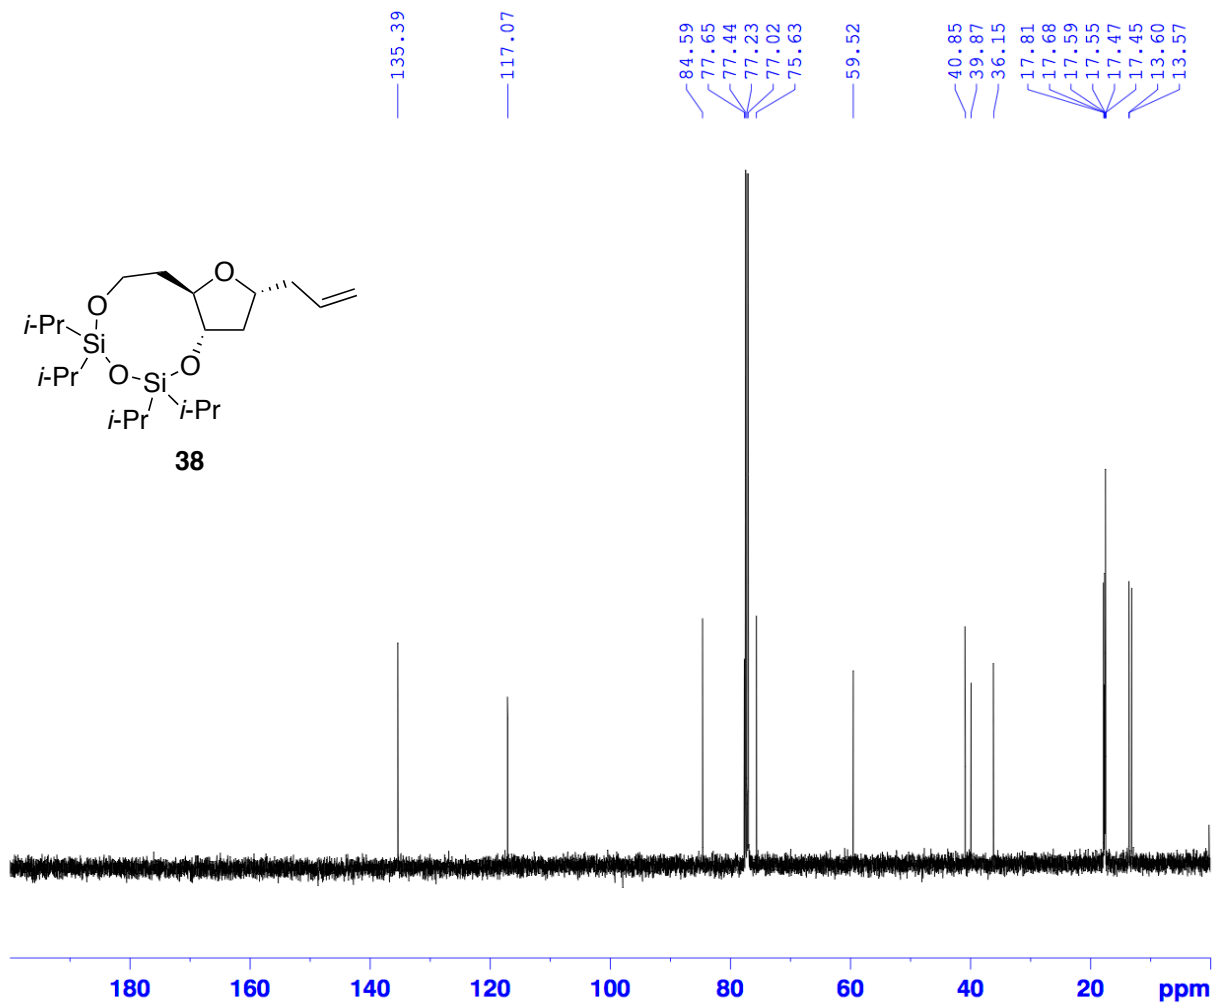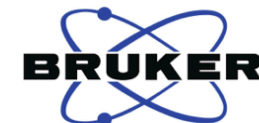

Current Data Parameters  
 NAME VTT-III-153-A  
 EXPNO 2  
 PROCNO 1

F2 - Acquisition Parameters  
 Date\_ 20120622  
 Time 20.20  
 INSTRUM spect  
 PROBHD 5 mm PAQXI 1H/  
 PULPROG zgpg30  
 TD 65536  
 SOLVENT CDC13  
 NS 128  
 DS 4  
 SWH 36057.691 Hz  
 FIDRES 0.550197 Hz  
 AQ 0.9088159 sec  
 RG 184.65  
 DW 13.867 usec  
 DE 6.50 usec  
 TE 298.2 K  
 D1 2.0000000 sec  
 D11 0.0300000 sec  
 TD0 1

===== CHANNEL f1 =====  
 NUC1 13C  
 P1 15.00 usec  
 PLW1 106.0000000 W  
 SFO1 150.9329866 MHz

===== CHANNEL f2 =====  
 CPDPRG2 waltz16  
 NUC2 1H  
 PCPD2 70.00 usec  
 PLW2 9.30000019 W  
 PLW12 0.18190999 W  
 PLW13 0.08913500 W  
 SFO2 600.1924008 MHz

F2 - Processing parameters  
 SI 32768  
 SF 150.9178633 MHz  
 WDW EM  
 SSB 0  
 LB 1.00 Hz  
 GB 0  
 PC 1.40



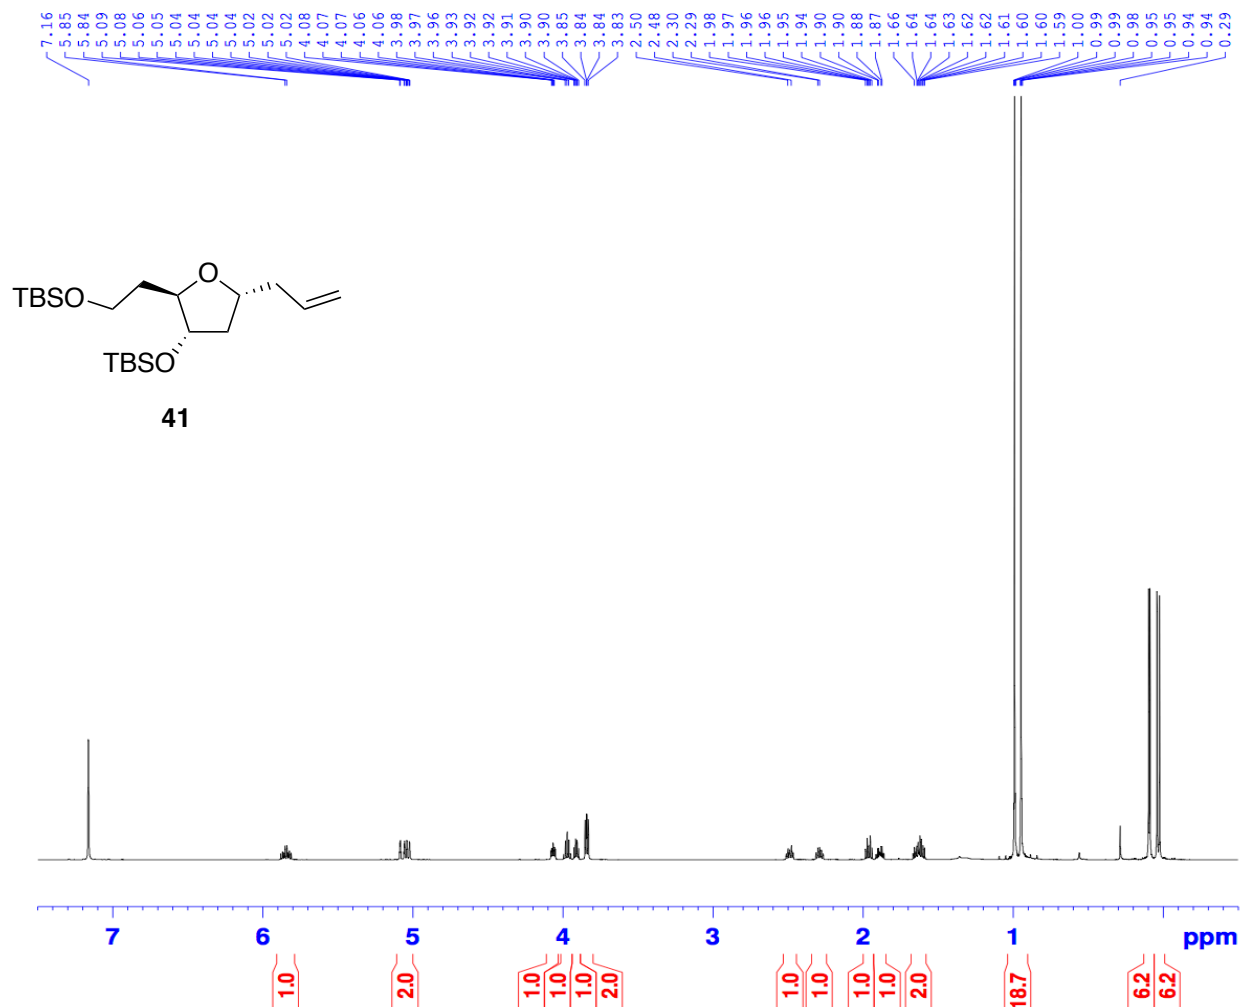

Current Data Parameters  
NAME VIT-III-202-A  
EXPNO 1  
PROCNO 1

F2 - Acquisition Parameters  
Date\_ 20120817  
Time 12.58  
INSTRUM spect  
PROBHD 5 mm PABBO BB/  
PULPROG zg30  
TD 65536  
SOLVENT C6D6  
NS 8  
DS 0  
SWH 12335.526 Hz  
FIDRES 0.188225 Hz  
AQ 2.6564426 sec  
RG 33.59  
DW 40.533 usec  
DE 6.50 usec  
TE 298.1 K  
D1 2.00000000 sec  
TD0 1

===== CHANNEL f1 =====  
NUC1 1H  
P1 11.00 usec  
PLW1 26.5000000 W  
SFO1 600.1937064 MHz

F2 - Processing parameters  
SI 65536  
SF 600.1899954 MHz  
WDW EM  
SSB 0  
LB 0.30 Hz  
GB 0  
PC 1.00

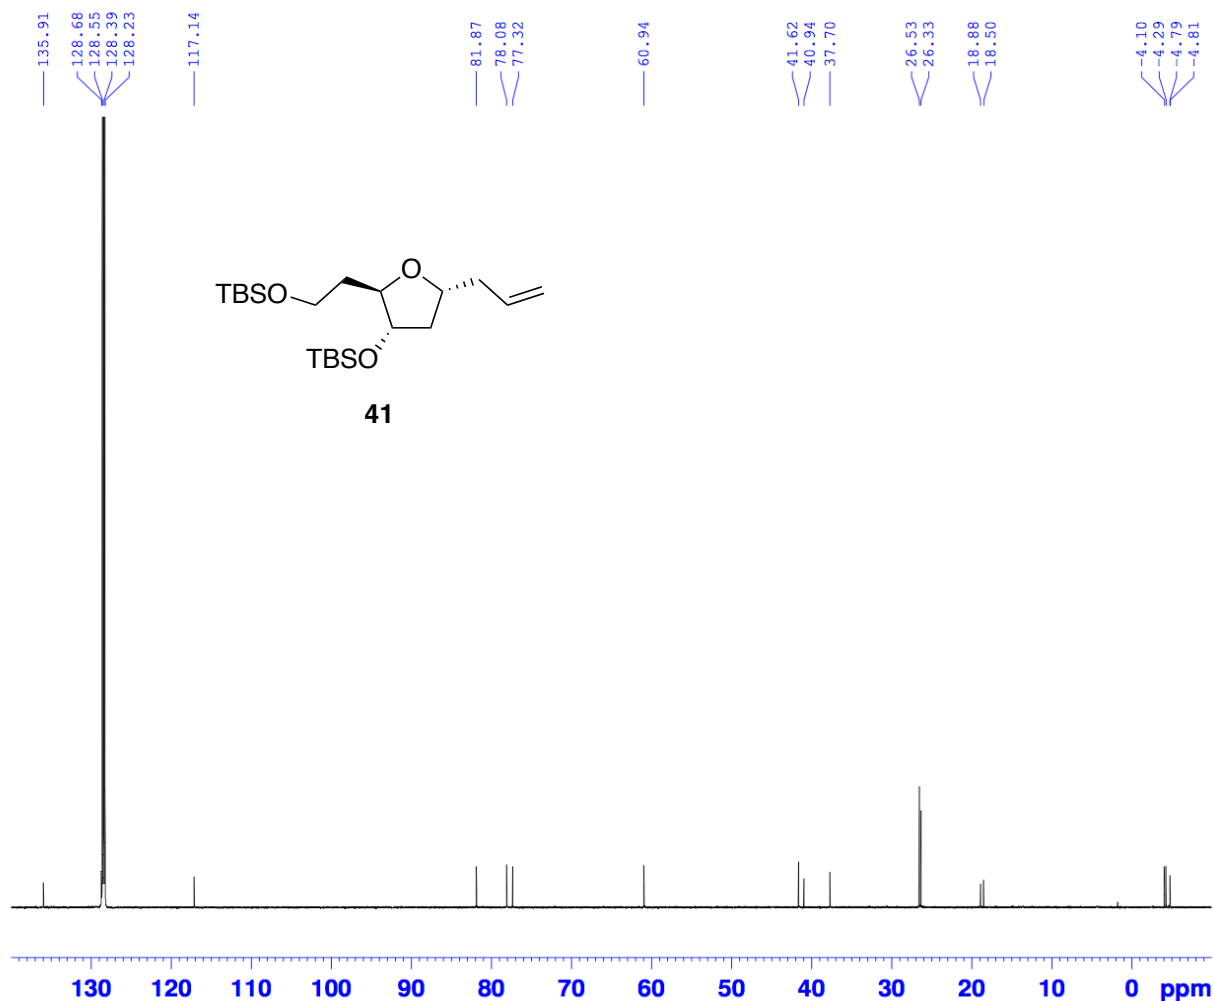

Current Data Parameters  
 NAME VTT-III-202-A  
 EXPNO 2  
 PROCNO 1

F2 - Acquisition Parameters  
 Date\_ 20120817  
 Time 13.03  
 INSTRUM spect  
 PROBHD 5 mm PABBO BB/  
 PULPROG zgpg30  
 TD 65536  
 SOLVENT C6D6  
 NS 128  
 DS 0  
 SWH 36057.691 Hz  
 FIDRES 0.550197 Hz  
 AQ 0.9088159 sec  
 RG 184.65  
 DW 13.867 usec  
 DE 6.50 usec  
 TE 298.3 K  
 D1 2.5000000 sec  
 D11 0.03000000 sec  
 TD0 1

===== CHANNEL f1 =====  
 NUC1 13C  
 P1 10.65 usec  
 PLW1 104.0000000 W  
 SFO1 150.9329866 MHz

===== CHANNEL f2 =====  
 CPDPRG2 waltz16  
 NUC2 1H  
 PCPD2 70.00 usec  
 PLW2 26.50000000 W  
 PLW12 0.65438998 W  
 PLW13 0.32065001 W  
 SFO2 600.1924008 MHz

F2 - Processing parameters  
 SI 32768  
 SF 150.9177886 MHz  
 WDW EM  
 SSB 0  
 LB 1.00 Hz  
 GB 0  
 PC 1.40

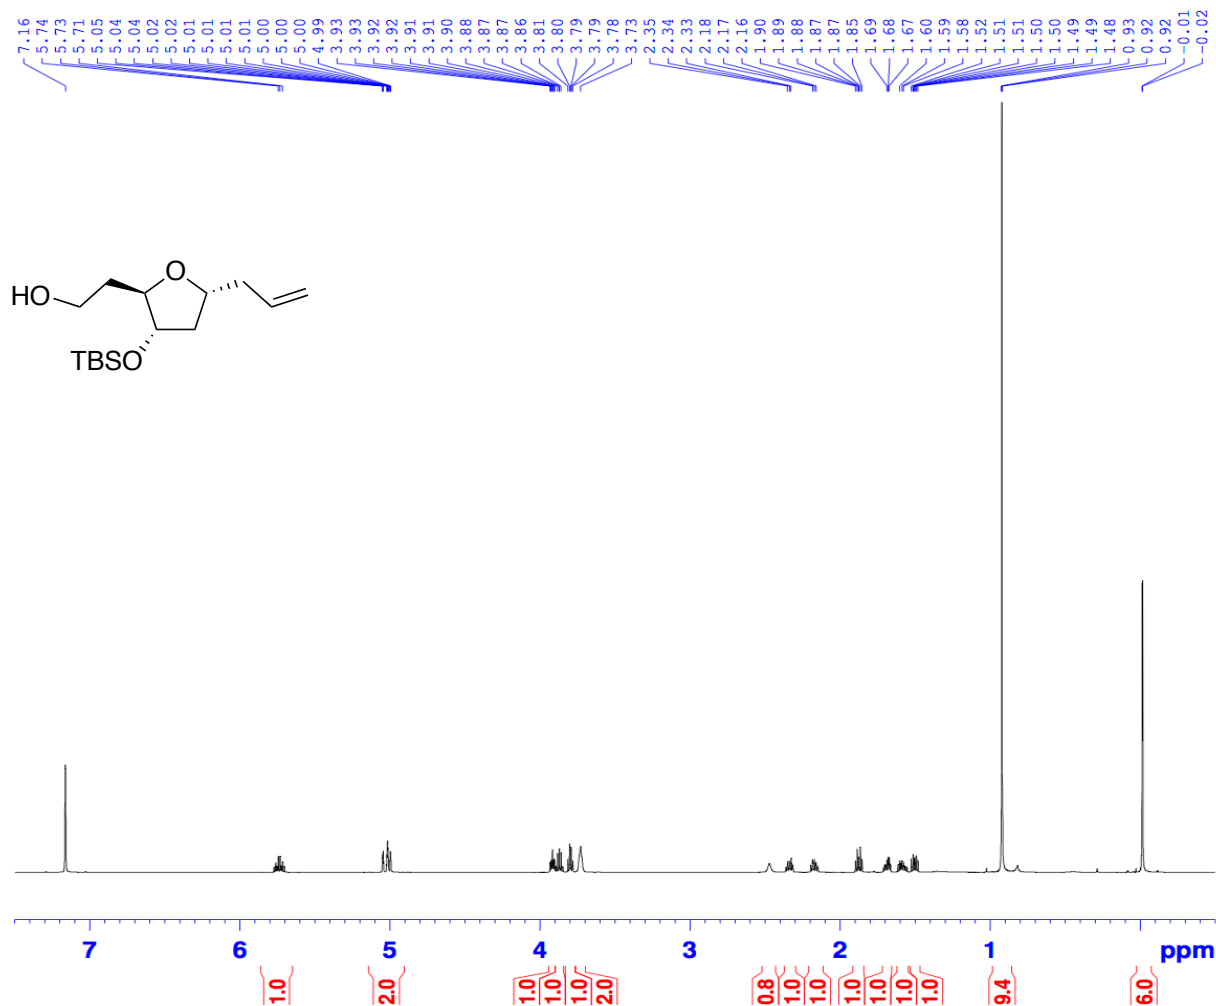

Current Data Parameters  
NAME VIT-III-203-B  
EXPNO 1  
PROCNO 1

F2 - Acquisition Parameters  
Date\_ 20120817  
Time 13.35  
INSTRUM spect  
PROBHD 5 mm PABBO BB/  
PULPROG zg30  
TD 65536  
SOLVENT C6D6  
NS 8  
DS 0  
SWH 12335.526 Hz  
FIDRES 0.188225 Hz  
AQ 2.6564426 sec  
RG 33.59  
DW 40.533 usec  
DE 6.50 usec  
TE 298.1 K  
D1 2.00000000 sec  
TD0 1

===== CHANNEL f1 =====  
NUC1 1H  
P1 11.00 usec  
PLW1 26.5000000 W  
SFO1 600.1937064 MHz

F2 - Processing parameters  
SI 65536  
SF 600.1899953 MHz  
WDW EM  
SSB 0  
LB 0.30 Hz  
GB 0  
PC 1.00

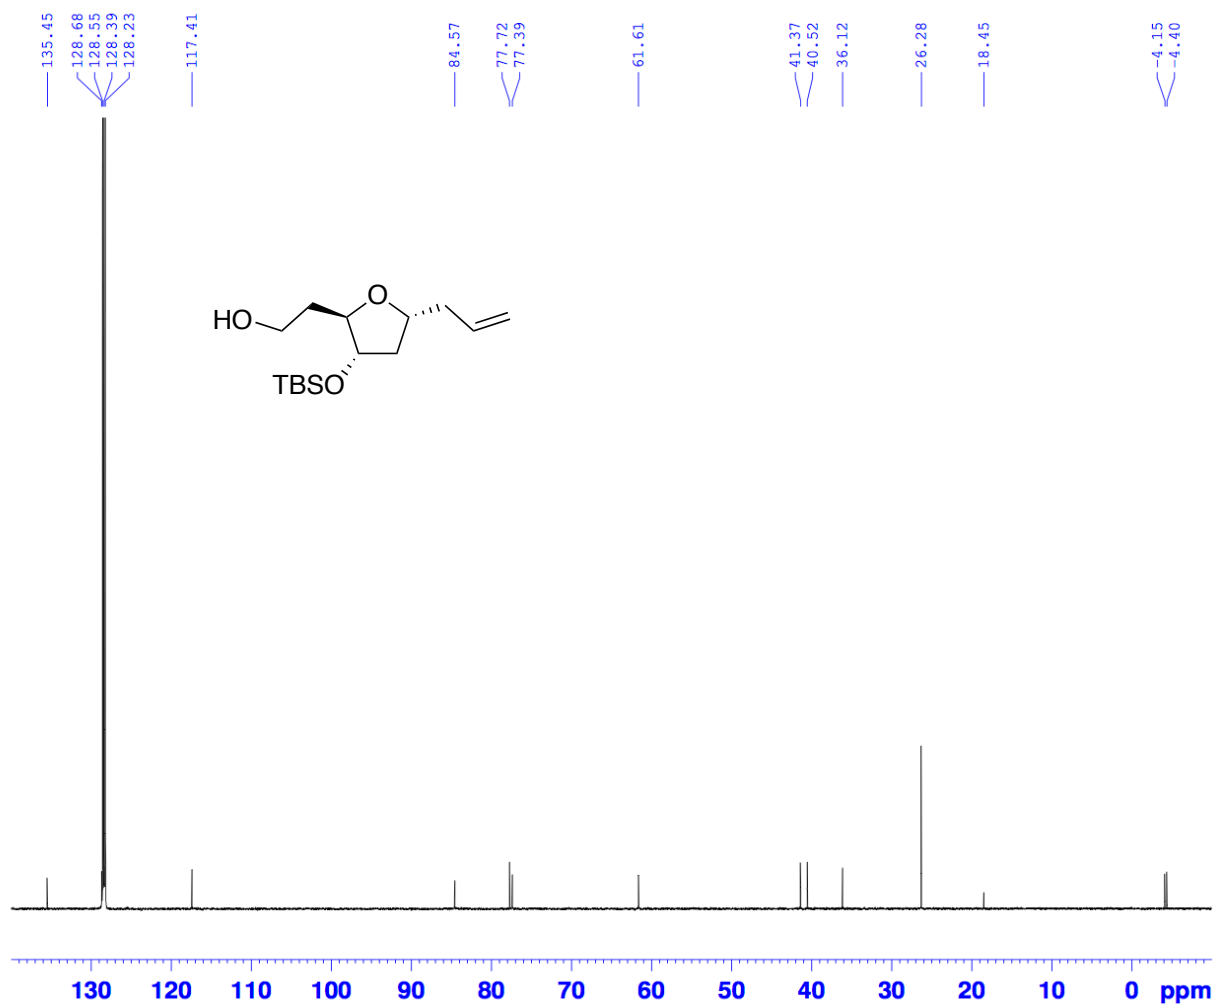

Current Data Parameters  
 NAME VTT-III-203-B  
 EXPNO 2  
 PROCNO 1

F2 - Acquisition Parameters  
 Date\_ 20120817  
 Time 13.41  
 INSTRUM spect  
 PROBHD 5 mm PABBO BB/  
 PULPROG zgpg30  
 TD 65536  
 SOLVENT C6D6  
 NS 128  
 DS 0  
 SWH 36057.691 Hz  
 FIDRES 0.550197 Hz  
 AQ 0.9088159 sec  
 RG 184.65  
 DW 13.867 usec  
 DE 6.50 usec  
 TE 298.2 K  
 D1 2.0000000 sec  
 D11 0.0300000 sec  
 TD0 1

===== CHANNEL f1 =====  
 NUC1 13C  
 P1 10.65 usec  
 PLW1 104.0000000 W  
 SFO1 150.9329866 MHz

===== CHANNEL f2 =====  
 CPDPRG2 waltz16  
 NUC2 1H  
 PCPD2 70.00 usec  
 PLW2 26.5000000 W  
 PLW12 0.65438998 W  
 PLW13 0.32065001 W  
 SFO2 600.1924008 MHz

F2 - Processing parameters  
 SI 32768  
 SF 150.9177890 MHz  
 WDW EM  
 SSB 0  
 LB 1.00 Hz  
 GB 0  
 PC 1.40

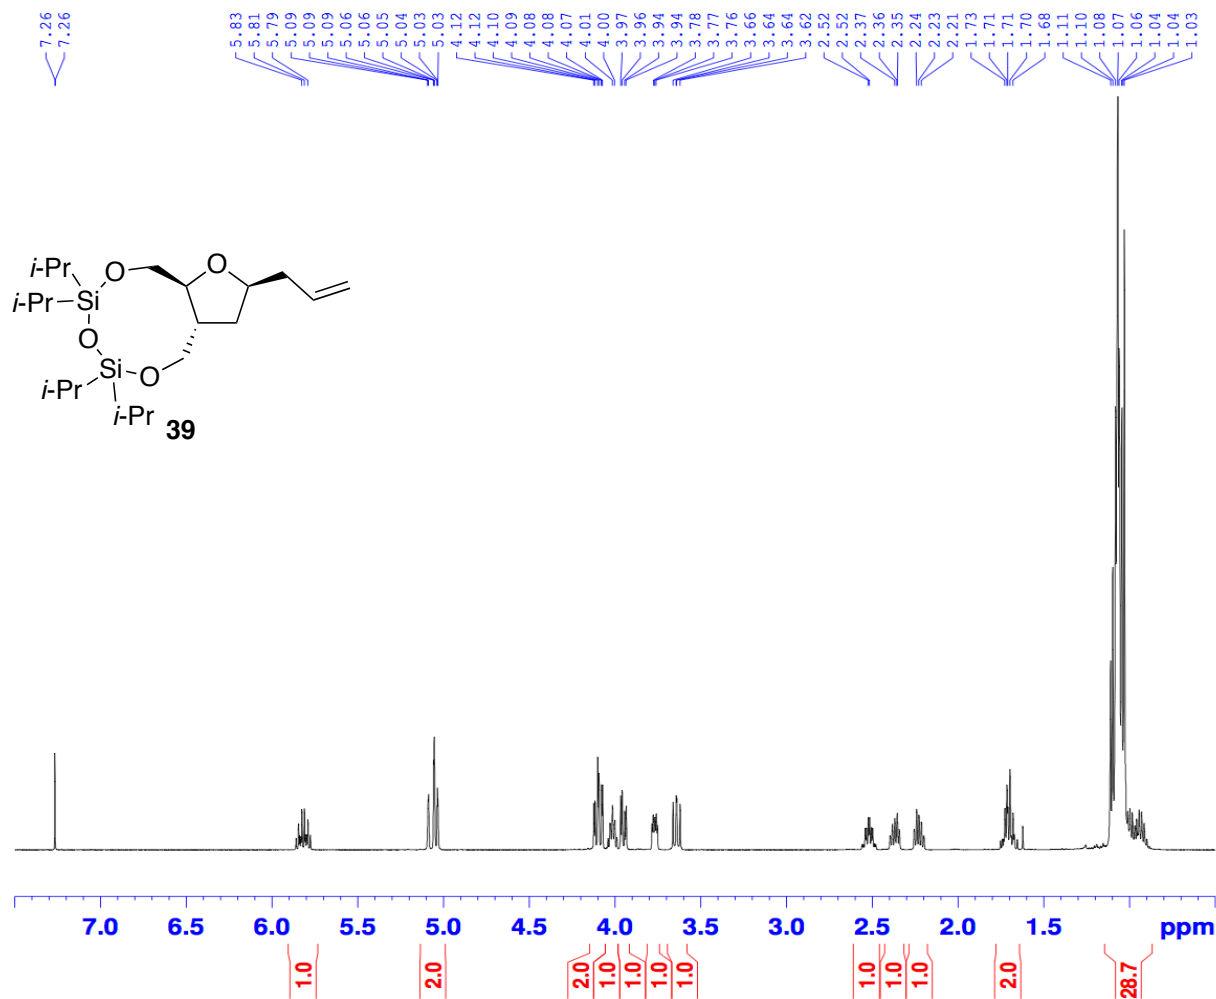

Current Data Parameters  
NAME VIT-II-163-A  
EXPNO 2  
PROCNO 1

F2 - Acquisition Parameters  
Date\_ 20111003  
Time 15.40  
INSTRUM spect  
PROBHD 5 mm BBO BB-1H  
PULPROG zg30  
TD 65536  
SOLVENT CDC13  
NS 16  
DS 2  
SWH 10330.578 Hz  
FIDRES 0.157632 Hz  
AQ 3.1719923 sec  
RG 71.8  
DW 48.400 usec  
DE 6.50 usec  
TE 298.2 K  
D1 2.00000000 sec  
TD0 1

===== CHANNEL f1 =====  
NUC1 1H  
P1 9.20 usec  
PL1 -3.00 dB  
PL1W 37.58904266 W  
SFO1 500.2020889 MHz

F2 - Processing parameters  
SI 32768  
SF 500.1990126 MHz  
WDW no  
SSB 0  
LB 0 Hz  
GB 0  
PC 1.00

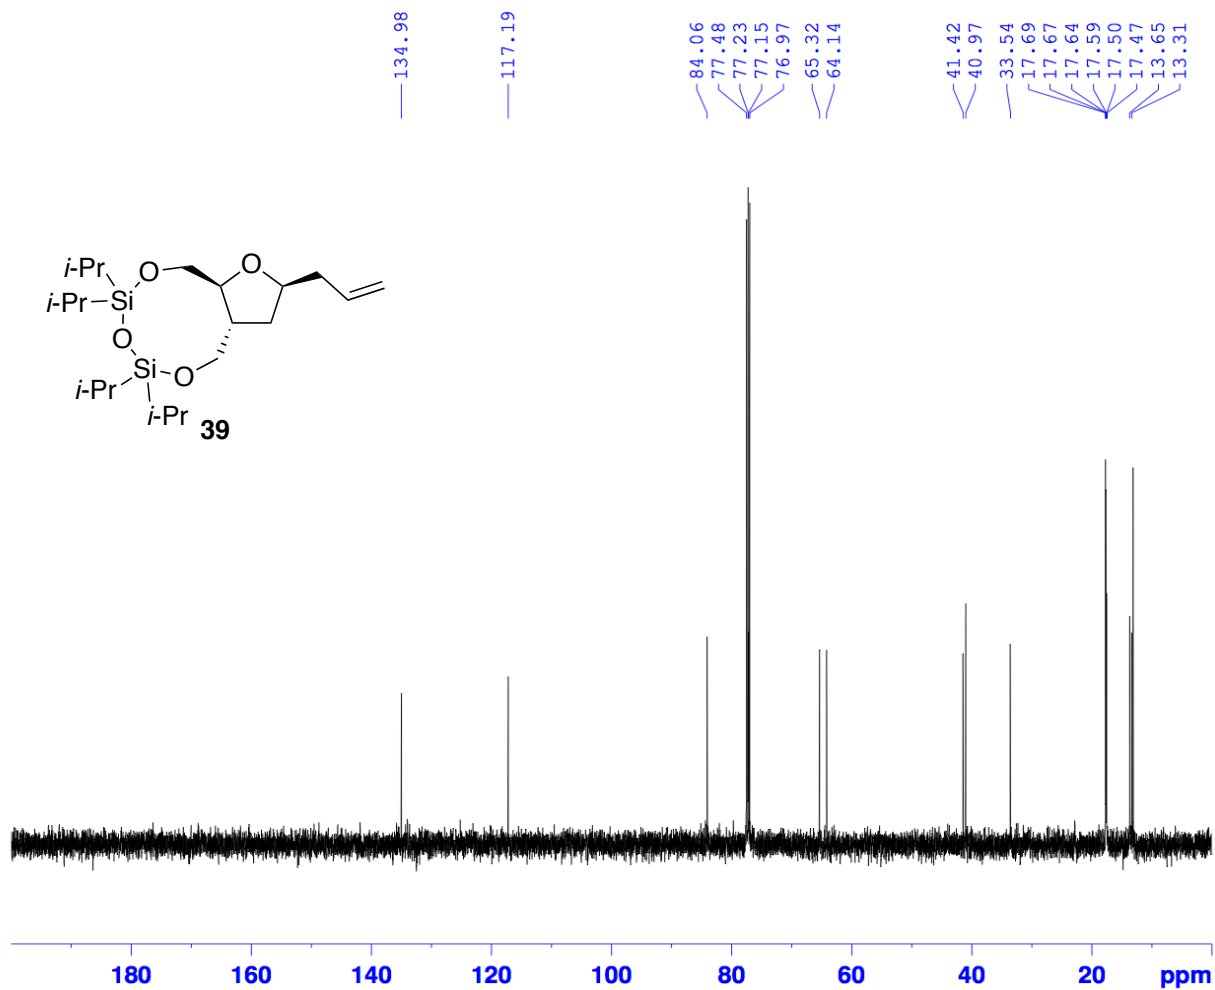

Current Data Parameters  
 NAME VIT-II-163-A  
 EXPNO 3  
 PROCNO 1

F2 - Acquisition Parameters  
 Date\_ 20111003  
 Time 15.44  
 INSTRUM spect  
 PROBHD 5 mm BBO BB-1H  
 PULPROG zgpg30  
 TD 65536  
 SOLVENT CDCl3  
 NS 30  
 DS 4  
 SWH 30030.029 Hz  
 FIDRES 0.458222 Hz  
 AQ 1.0912244 sec  
 RG 9195.2  
 DW 16.650 usec  
 DE 6.50 usec  
 TE 298.8 K  
 D1 2.00000000 sec  
 D11 0.03000000 sec  
 TD0 1

===== CHANNEL f1 =====  
 NUC1 13C  
 P1 10.25 usec  
 PL1 2.00 dB  
 PL1W 49.29017639 W  
 SFO1 125.7877161 MHz

===== CHANNEL f2 =====  
 CPDPRG2 waltz16  
 NUC2 1H  
 PCPD2 70.00 usec  
 PL2 -3.00 dB  
 PL12 14.63 dB  
 PL13 14.91 dB  
 PL2W 37.58904266 W  
 PL12W 0.64872593 W  
 PL13W 0.60822082 W  
 SFO2 500.2010008 MHz

F2 - Processing parameters  
 SI 32768  
 SF 125.7751125 MHz  
 WDW EM  
 SSB 0  
 LB 1.00 Hz  
 GB 0  
 PC 1.40

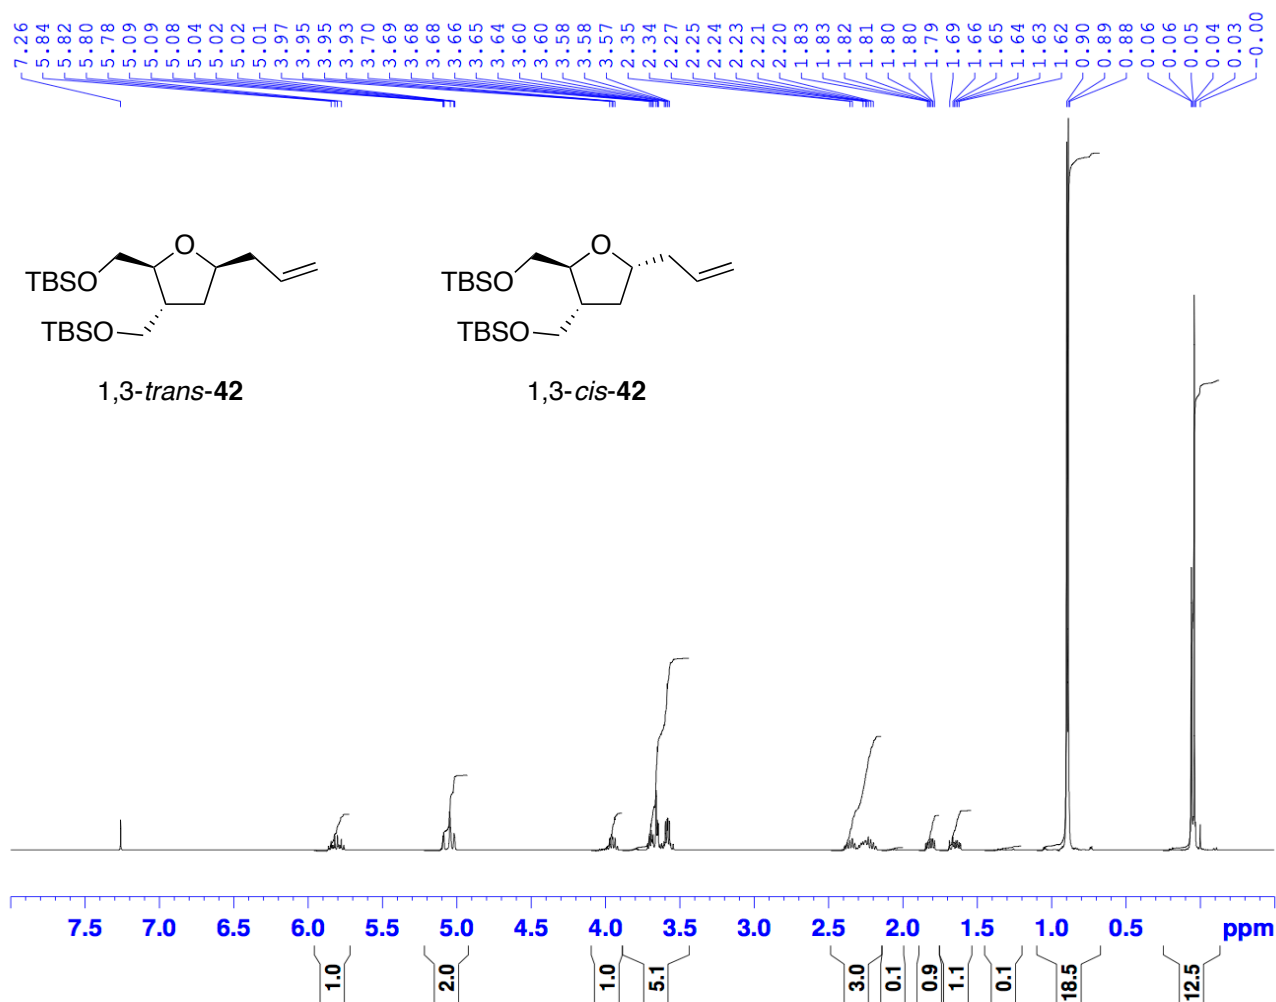

Current Data Parameters  
 NAME VIT-II-188-A  
 EXPNO 2  
 PROCNO 1

F2 - Acquisition Parameters  
 Date\_ 20111101  
 Time 23.52  
 INSTRUM spect  
 PROBHD 5 mm BBO BB-1H  
 PULPROG zg30  
 TD 65536  
 SOLVENT CDCl3  
 NS 16  
 DS 2  
 SWH 8278.146 Hz  
 FIDRES 0.126314 Hz  
 AQ 3.9584243 sec  
 RG 90.5  
 DW 60.400 usec  
 DE 6.50 usec  
 TE 298.2 K  
 D1 2.00000000 sec  
 TD0 1

===== CHANNEL f1 =====  
 NUC1 1H  
 P1 8.10 usec  
 PL1 -5.00 dB  
 PL1W 31.77312851 W  
 SFO1 400.1324710 MHz

F2 - Processing parameters  
 SI 32768  
 SF 400.1300093 MHz  
 WDW EM  
 SSB 0  
 LB 0.30 Hz  
 GB 0  
 PC 1.00

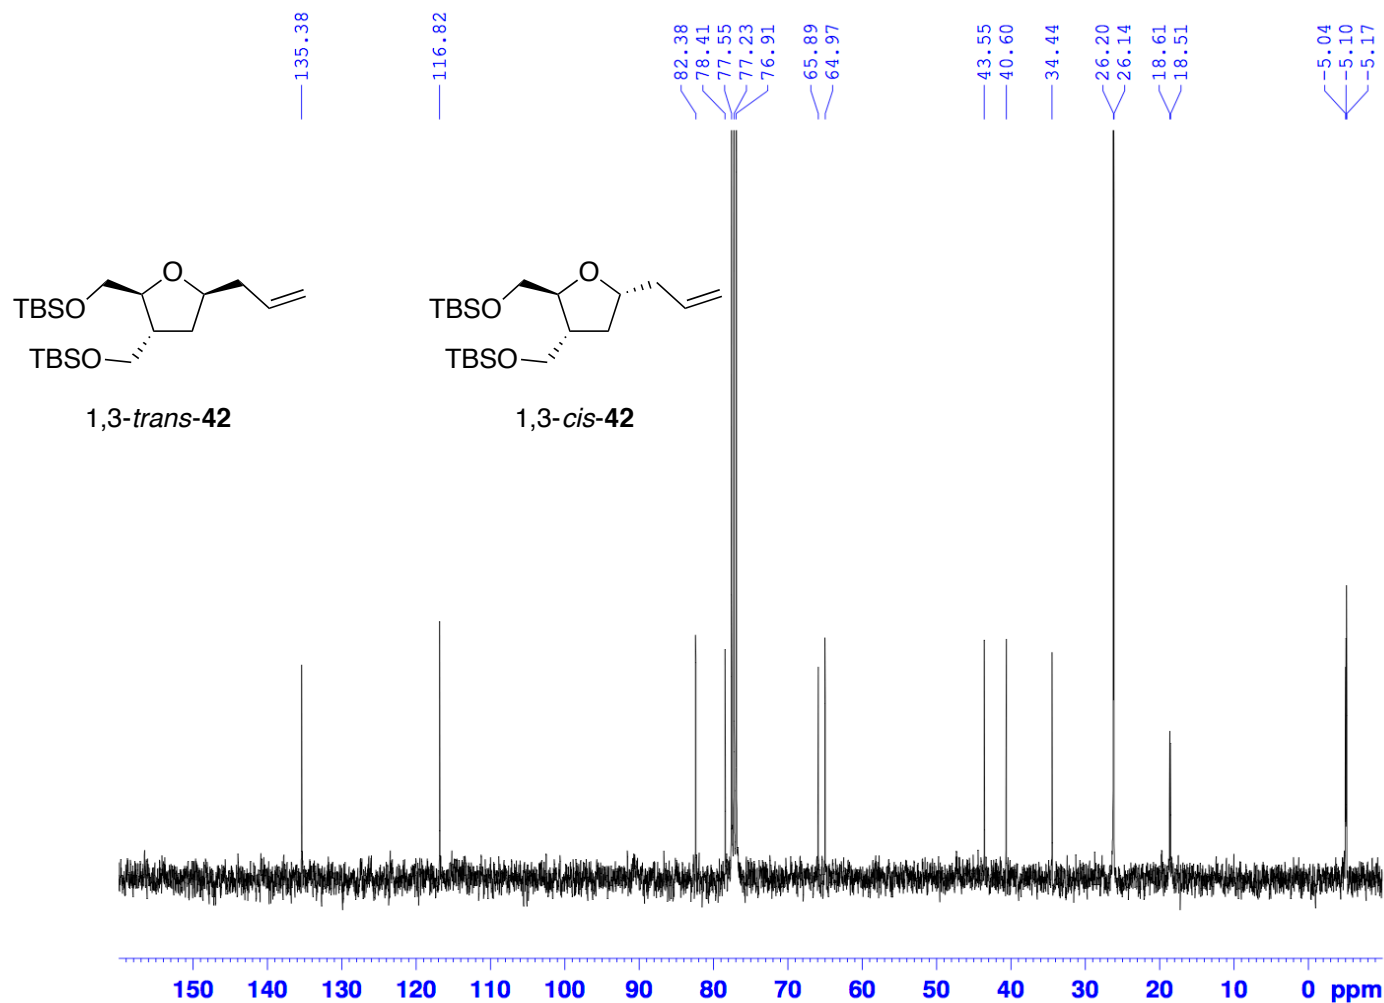

Current Data Parameters  
 NAME VIT-II-188-A  
 EXPNO 3  
 PROCNO 1

F2 - Acquisition Parameters  
 Date\_ 20111101  
 Time 23.54  
 INSTRUM spect  
 PROBHD 5 mm BBO BB-1H  
 PULPROG zgpg30  
 TD 65536  
 SOLVENT CDCl3  
 NS 68  
 DS 4  
 SWH 23980.814 Hz  
 FIDRES 0.365918 Hz  
 AQ 1.3664756 sec  
 RG 20642.5  
 DW 20.850 usec  
 DE 6.50 usec  
 TE 298.2 K  
 D1 2.50000000 sec  
 D11 0.03000000 sec  
 TD0 1

===== CHANNEL f1 =====  
 NUC1 13C  
 P1 6.50 usec  
 PL1 -4.00 dB  
 PL1W 25.23829460 W  
 SFO1 100.6228298 MHz

===== CHANNEL f2 =====  
 CPDPRG2 waltz16  
 NUC2 1H  
 PCPD2 70.00 usec  
 PL2 -5.00 dB  
 PL12 13.73 dB  
 PL13 13.73 dB  
 PL2W 31.77312851 W  
 PL12W 0.42565724 W  
 PL13W 0.42565724 W  
 SFO2 400.1316005 MHz

F2 - Processing parameters  
 SI 32768  
 SF 100.6127465 MHz  
 WDW EM  
 SSB 0  
 LB 2.00 Hz  
 GB 0  
 PC 1.40



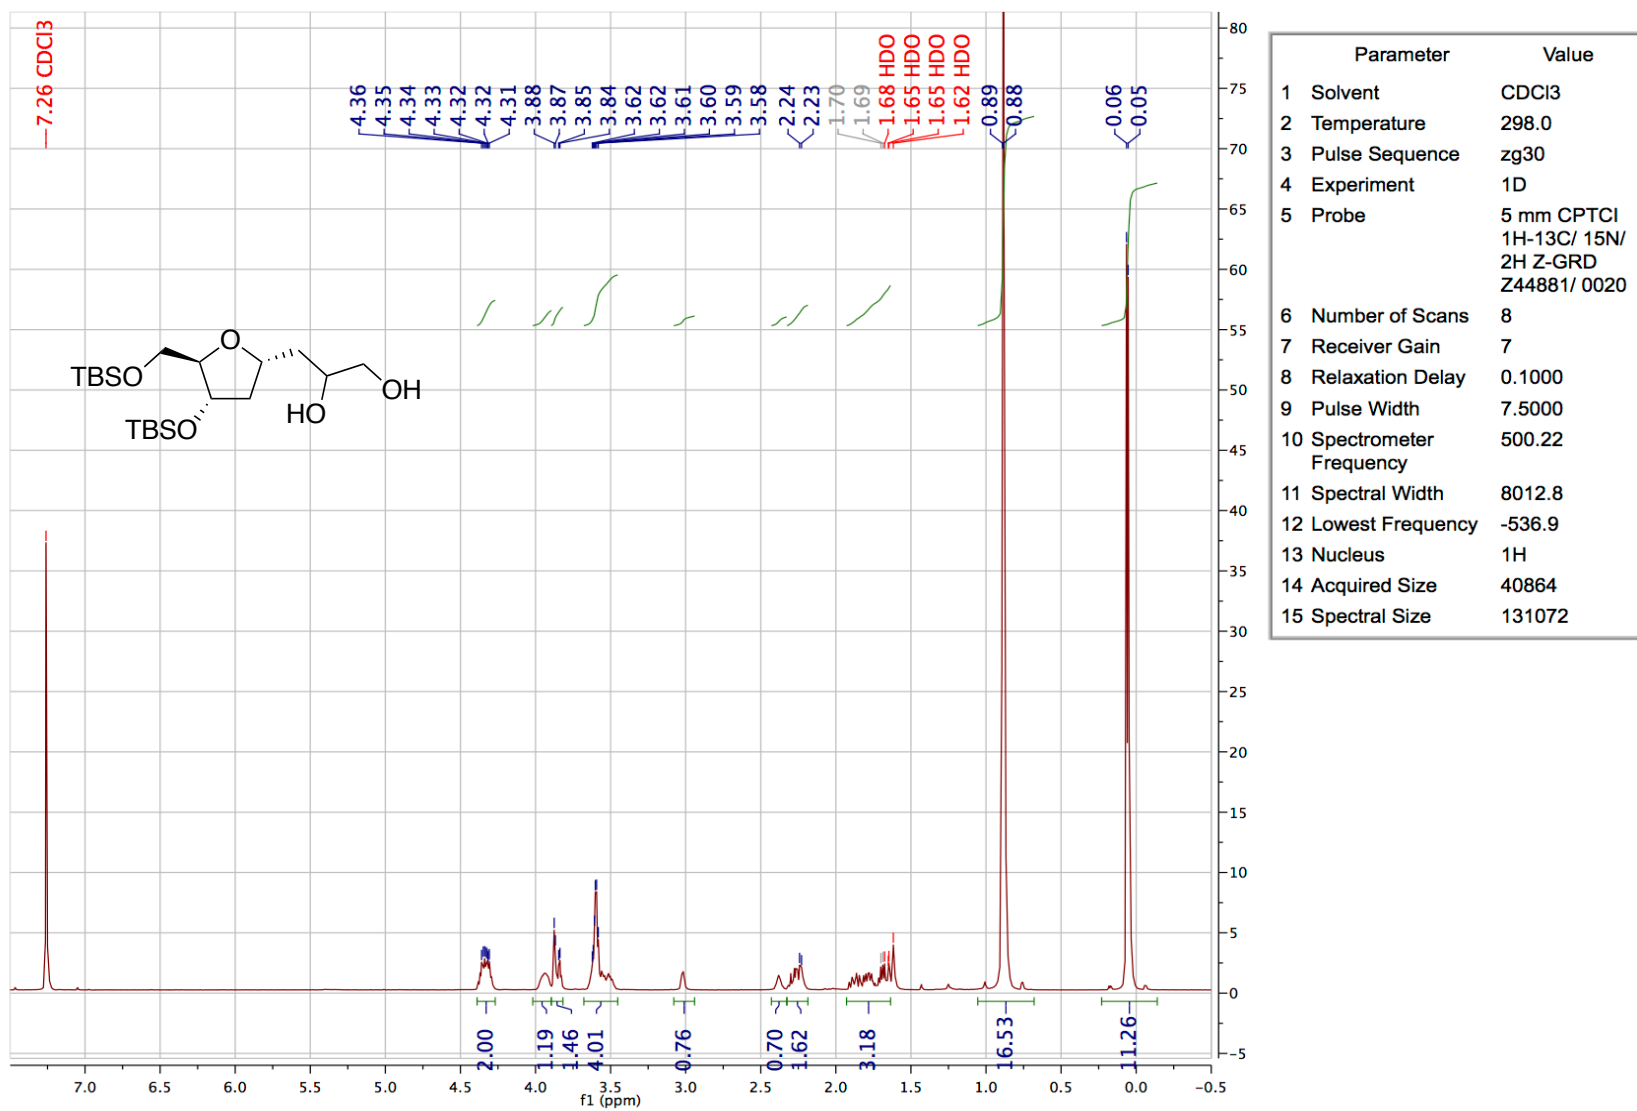

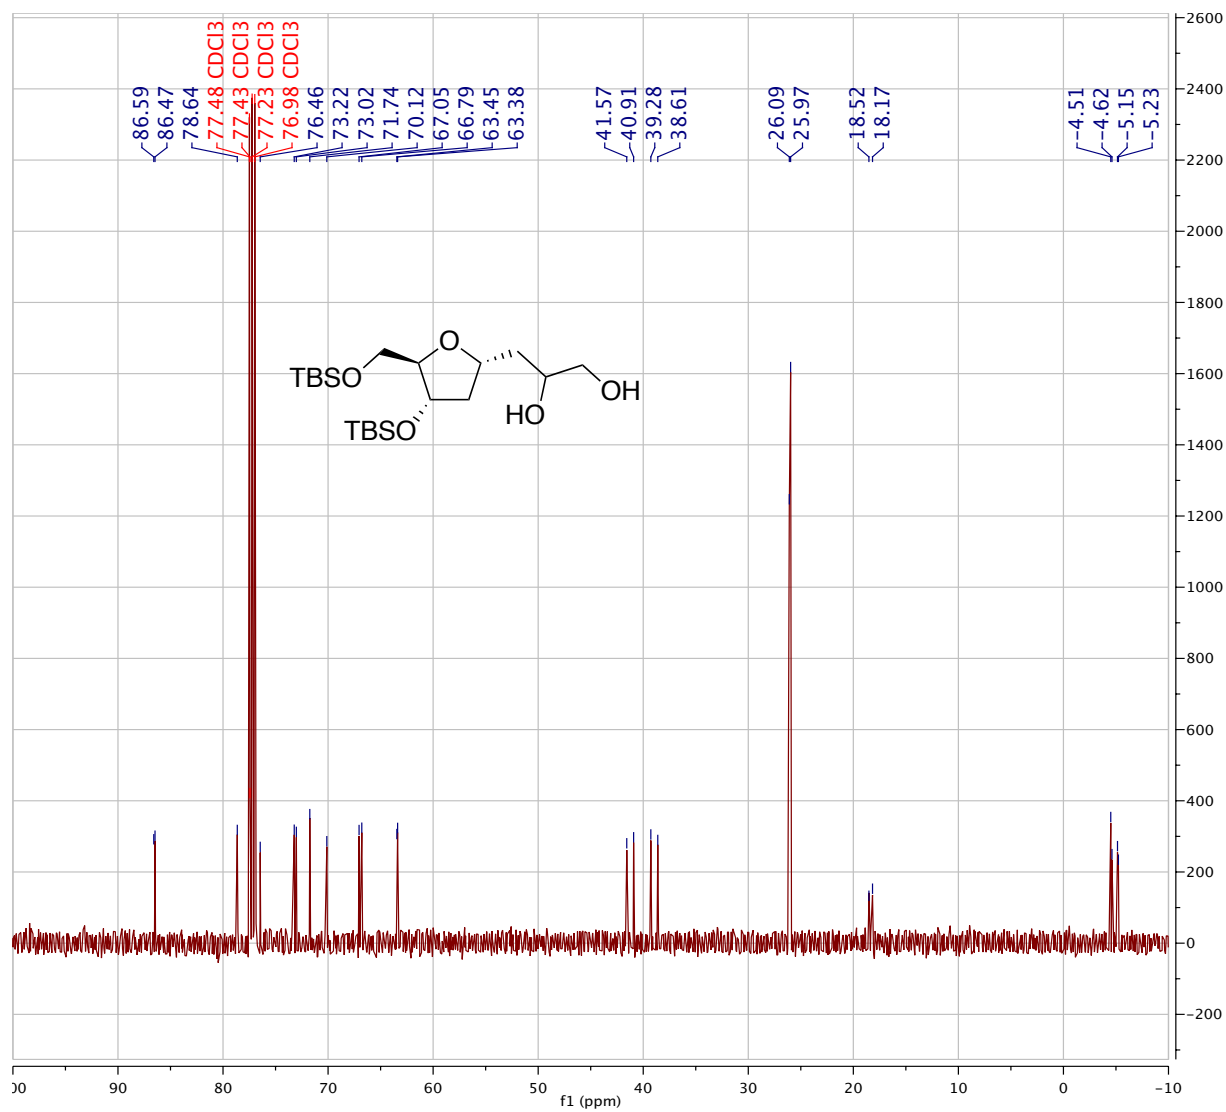

| Parameter                 | Value                                            |
|---------------------------|--------------------------------------------------|
| 1 Solvent                 | CDCI3                                            |
| 2 Temperature             | 298.0                                            |
| 3 Pulse Sequence          | SpinEchopg30gp.prd                               |
| 4 Experiment              | 1D                                               |
| 5 Probe                   | 5 mm CPTCI<br>1H-13C/ 15N/ 2H Z-GRD Z44881/ 0020 |
| 6 Number of Scans         | 152                                              |
| 7 Receiver Gain           | 7298                                             |
| 8 Relaxation Delay        | 0.2500                                           |
| 9 Pulse Width             | 15.5000                                          |
| 10 Spectrometer Frequency | 125.79                                           |
| 11 Spectral Width         | 30303.0                                          |
| 12 Lowest Frequency       | -1294.2                                          |
| 13 Nucleus                | 13C                                              |
| 14 Acquired Size          | 32768                                            |
| 15 Spectral Size          | 65536                                            |

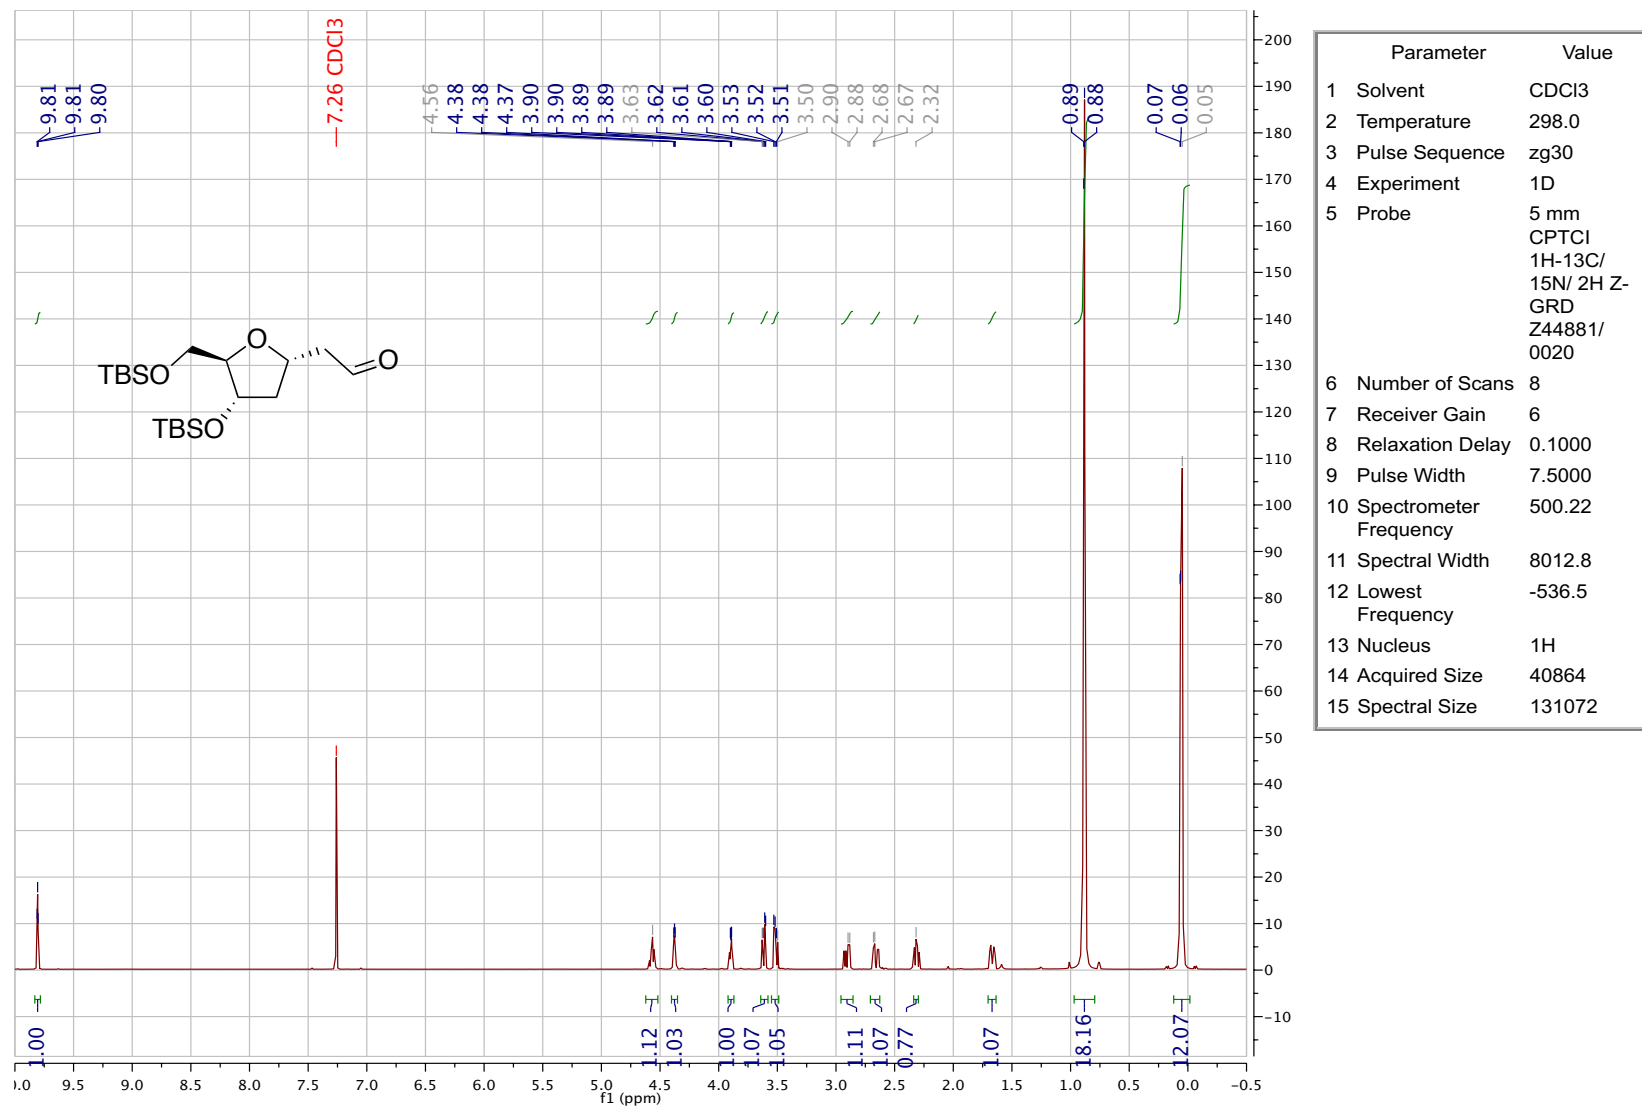

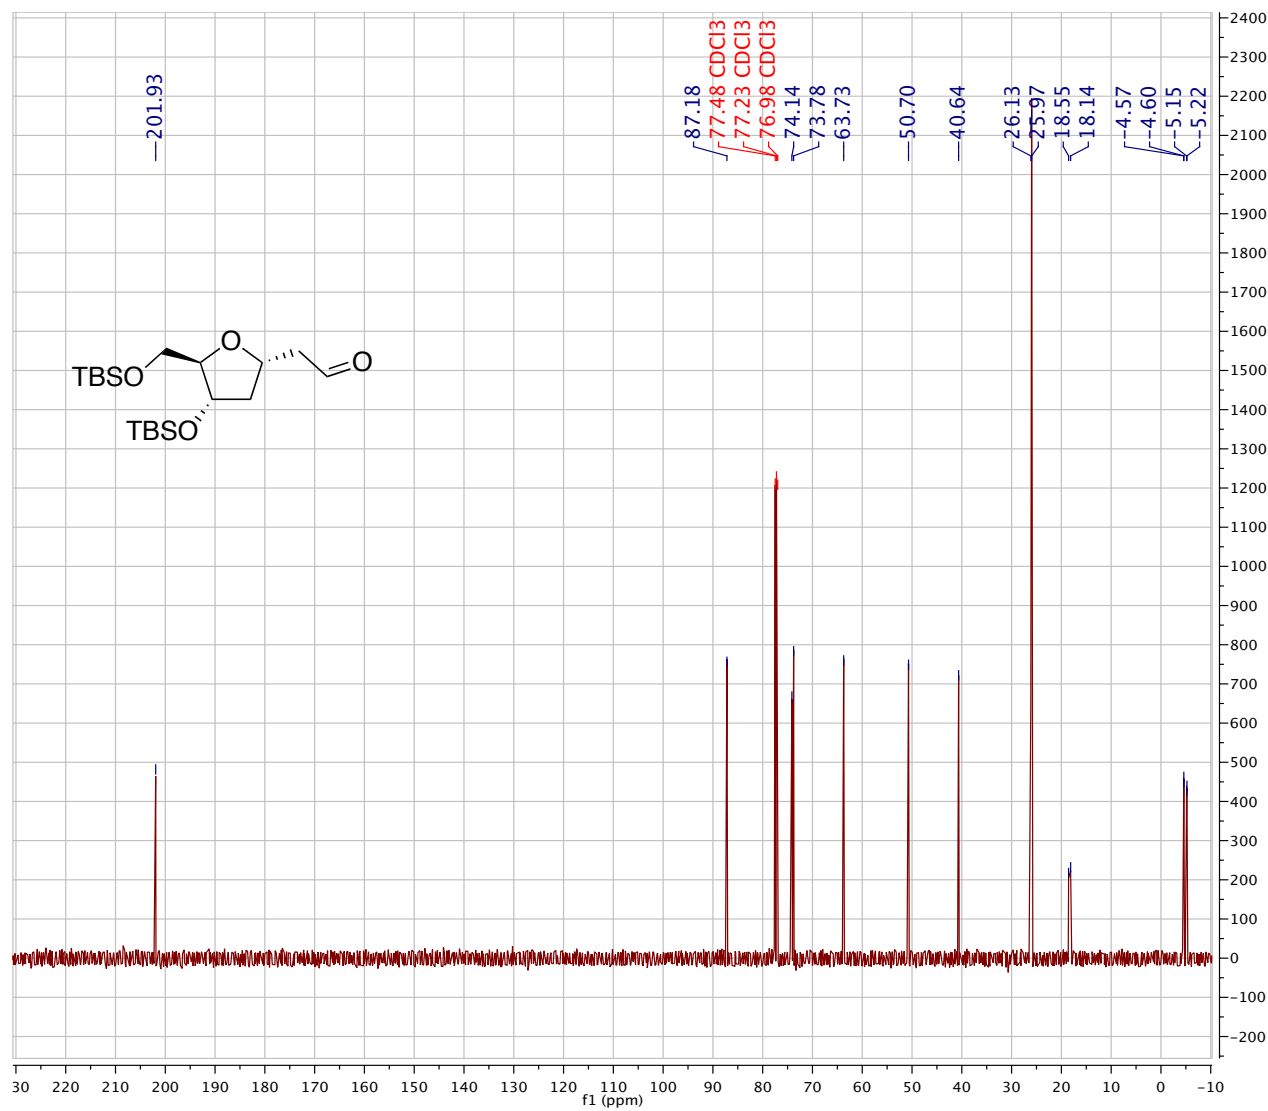

| Parameter                 | Value                                         |
|---------------------------|-----------------------------------------------|
| 1 Solvent                 | CDCl3                                         |
| 2 Temperature             | 298.0                                         |
| 3 Pulse Sequence          | SpinEchopg30 gp.prd                           |
| 4 Experiment              | 1D                                            |
| 5 Probe                   | 5 mm CPTCI 1H-13C/ 15N/ 2H Z-GRD Z44881/ 0020 |
| 6 Number of Scans         | 129                                           |
| 7 Receiver Gain           | 4598                                          |
| 8 Relaxation Delay        | 0.2500                                        |
| 9 Pulse Width             | 15.5000                                       |
| 10 Spectrometer Frequency | 125.79                                        |
| 11 Spectral Width         | 30303.0                                       |
| 12 Lowest Frequency       | -1294.2                                       |
| 13 Nucleus                | 13C                                           |
| 14 Acquired Size          | 32768                                         |
| 15 Spectral Size          | 65536                                         |

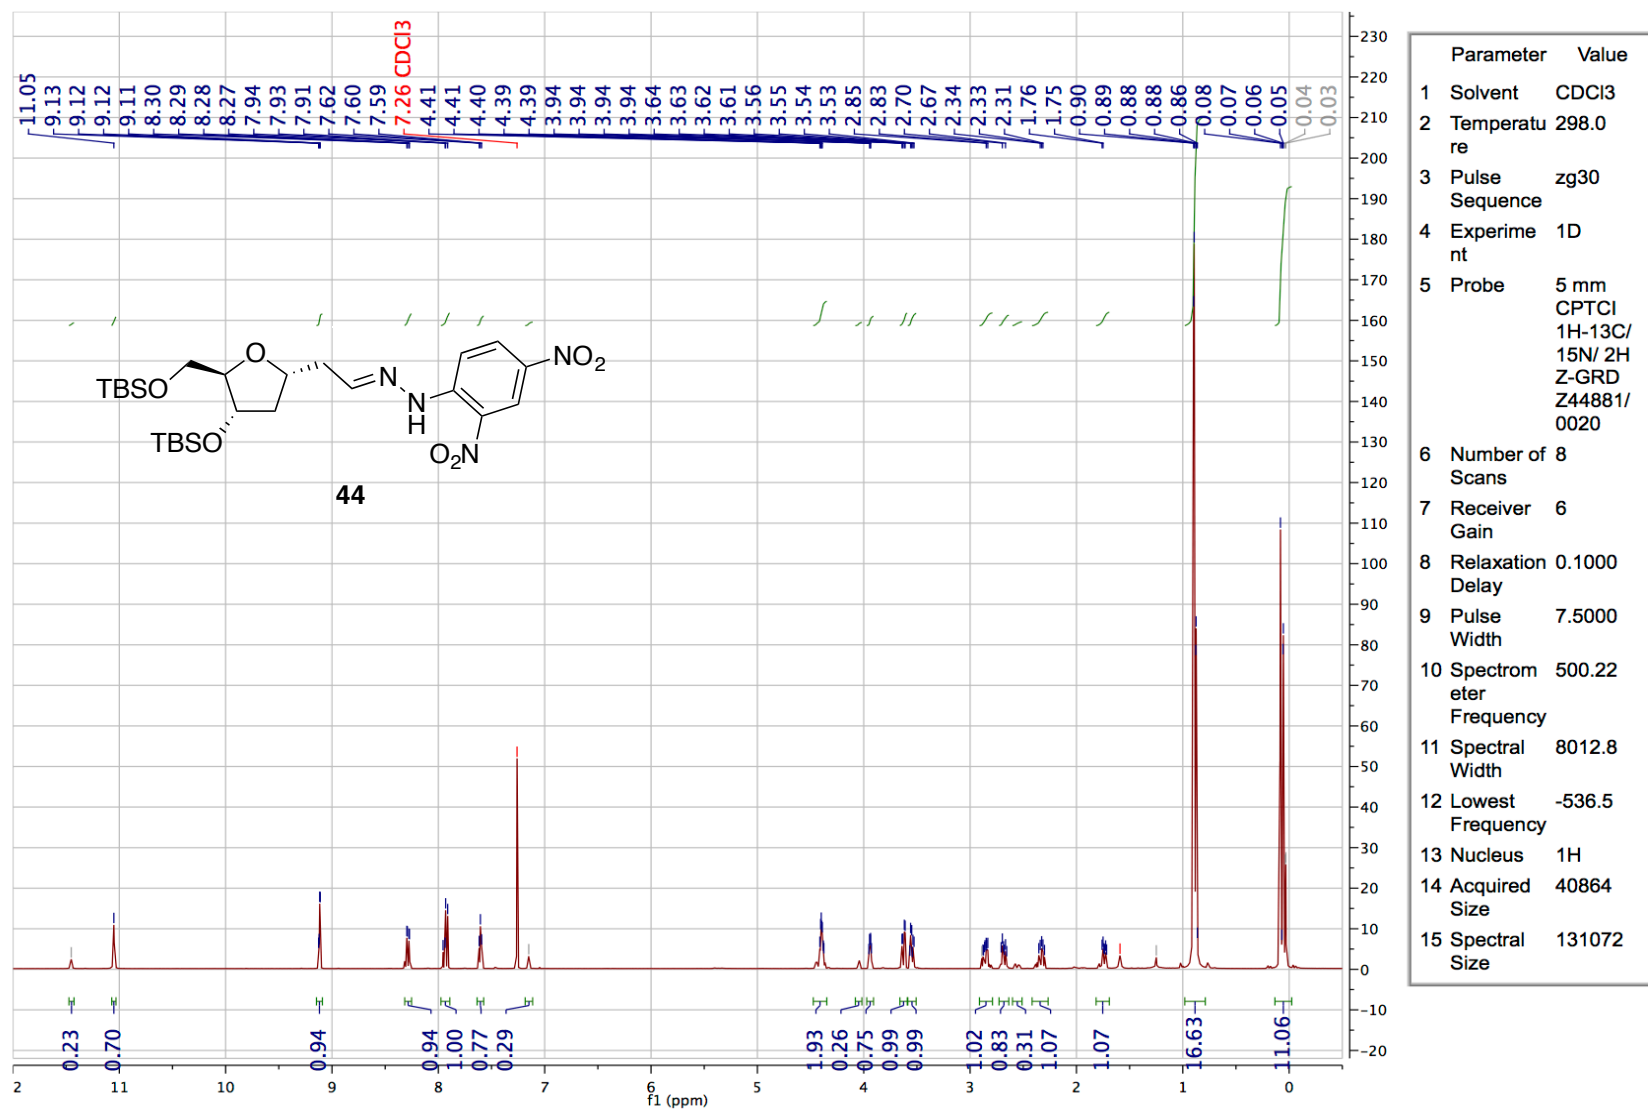

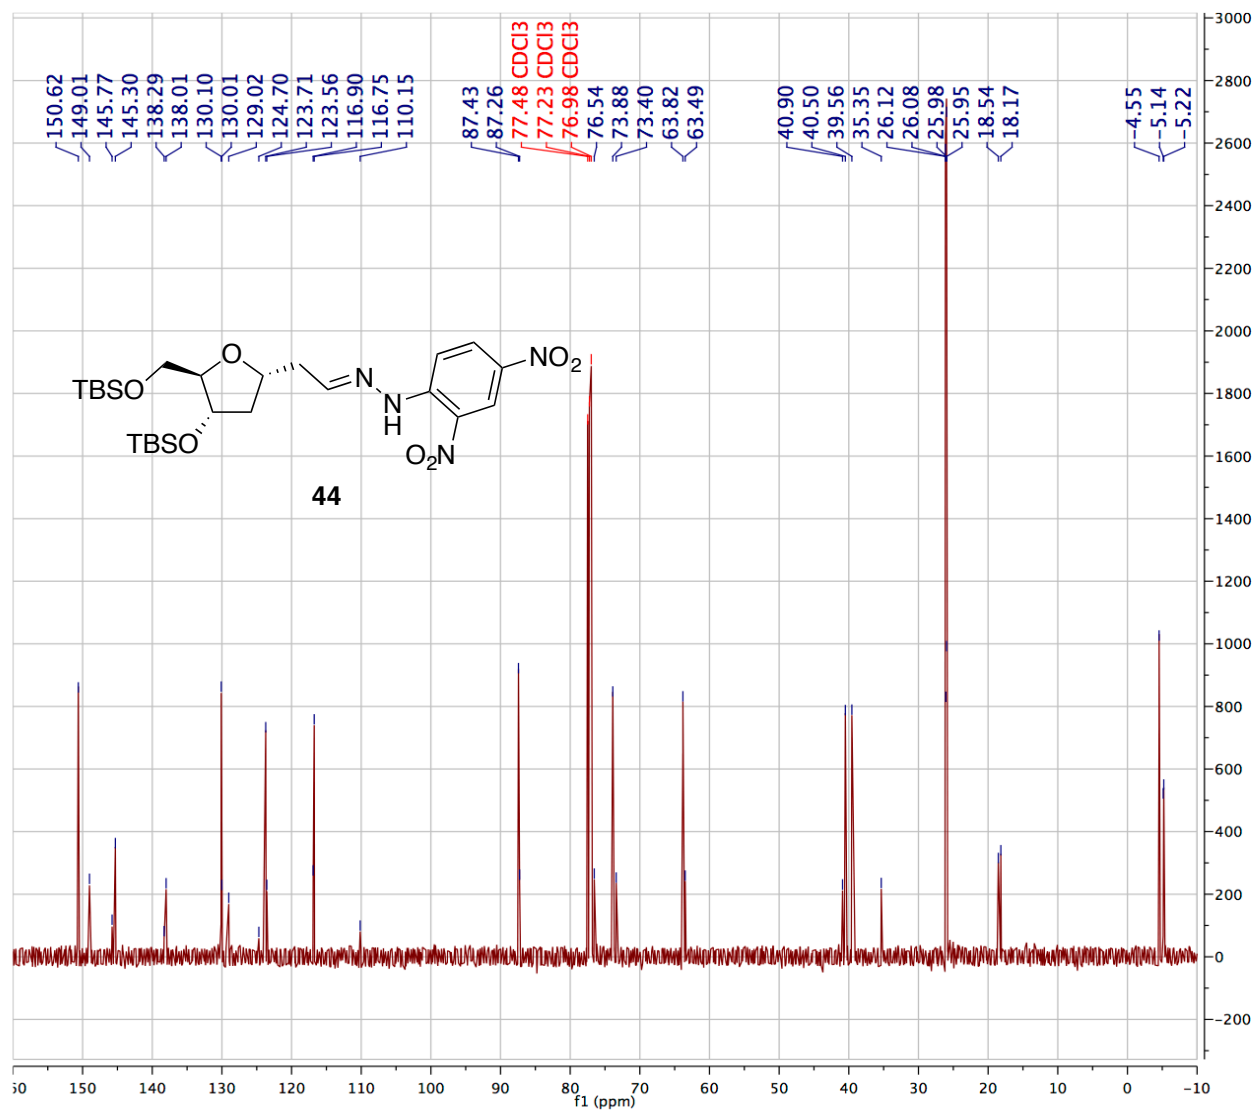

| Parameter                 | Value                                                  |
|---------------------------|--------------------------------------------------------|
| 1 Solvent                 | CDCl3                                                  |
| 2 Temperature             | 298.0                                                  |
| 3 Pulse Sequence          | SpinEchopg30g<br>p.prd                                 |
| 4 Experiment              | 1D                                                     |
| 5 Probe                   | 5 mm CPTCI<br>1H-13C/ 15N/<br>2H Z-GRD<br>Z44881/ 0020 |
| 6 Number of Scans         | 114                                                    |
| 7 Receiver Gain           | 7298                                                   |
| 8 Relaxation Delay        | 0.2500                                                 |
| 9 Pulse Width             | 15.5000                                                |
| 10 Spectrometer Frequency | 125.79                                                 |
| 11 Spectral Width         | 30303.0                                                |
| 12 Lowest Frequency       | -1295.4                                                |
| 13 Nucleus                | 13C                                                    |
| 14 Acquired Size          | 32768                                                  |
| 15 Spectral Size          | 65536                                                  |



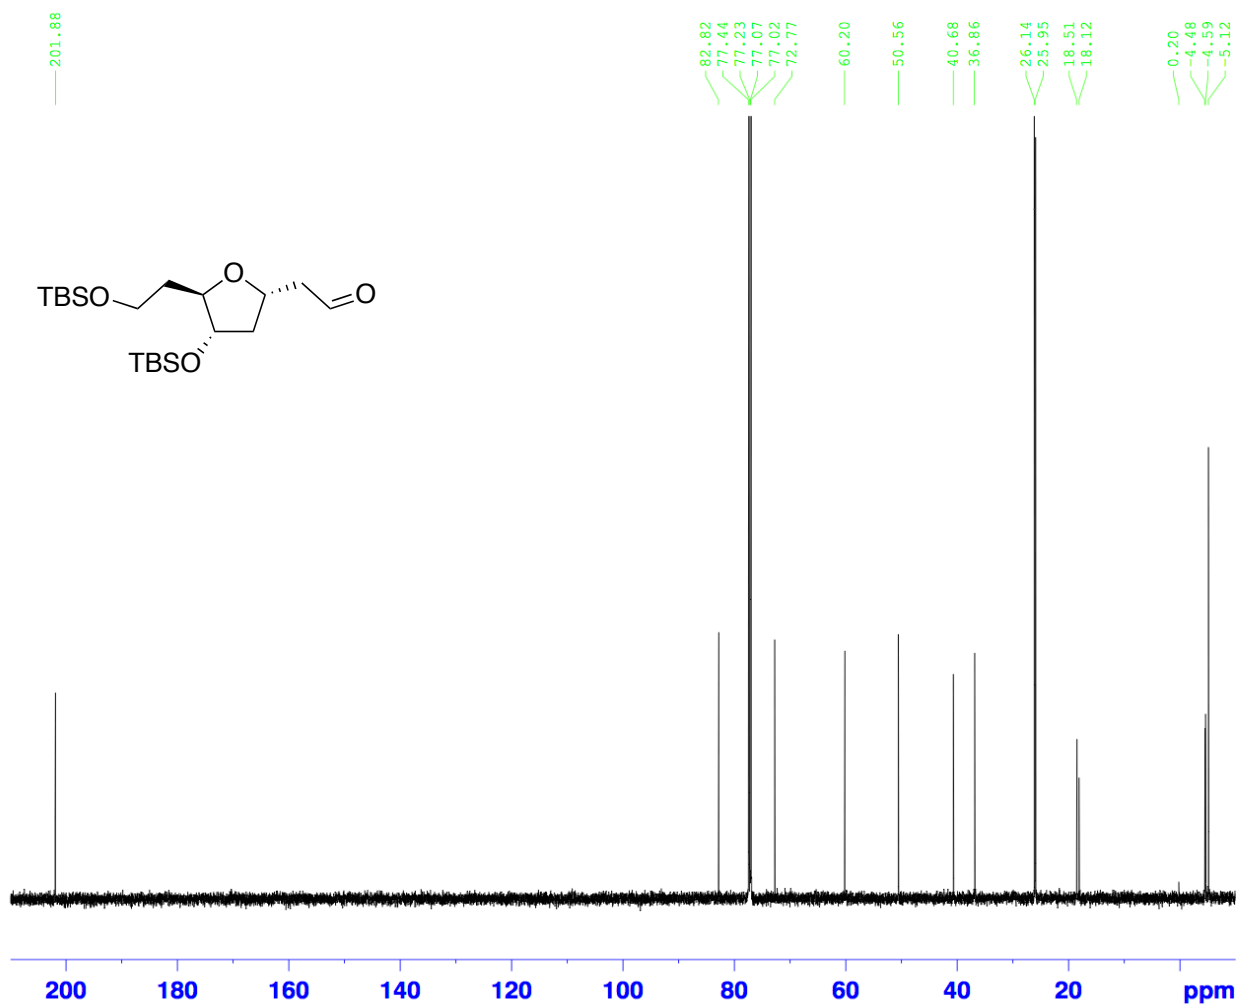

Current Data Parameters  
 NAME VIT-IV-12-A  
 EXPNO 2  
 PROCNO 1

F2 - Acquisition Parameters  
 Date\_ 20120905  
 Time 22.07  
 INSTRUM spect  
 PROBHD 5 mm PABBO BB/  
 PULPROG zgpg30  
 TD 65536  
 SOLVENT CDC13  
 NS 128  
 DS 0  
 SWH 36057.691 Hz  
 FIDRES 0.550197 Hz  
 AQ 0.9088159 sec  
 RG 184.65  
 DW 13.867 usec  
 DE 6.50 usec  
 TE 298.3 K  
 D1 2.50000000 sec  
 D11 0.03000000 sec  
 TD0 1

===== CHANNEL f1 =====  
 NUC1 13C  
 P1 10.65 usec  
 PLW1 104.00000000 W  
 SFO1 150.9329866 MHz

===== CHANNEL f2 =====  
 CPDPRG2 waltz16  
 NUC2 1H  
 PCPD2 70.00 usec  
 PLW2 26.50000000 W  
 PLW12 0.65438998 W  
 PLW13 0.32065001 W  
 SFO2 600.1924008 MHz

F2 - Processing parameters  
 SI 32768  
 SF 150.9178645 MHz  
 WDW EM  
 SSB 0  
 LB 1.00 Hz  
 GB 0  
 PC 1.40



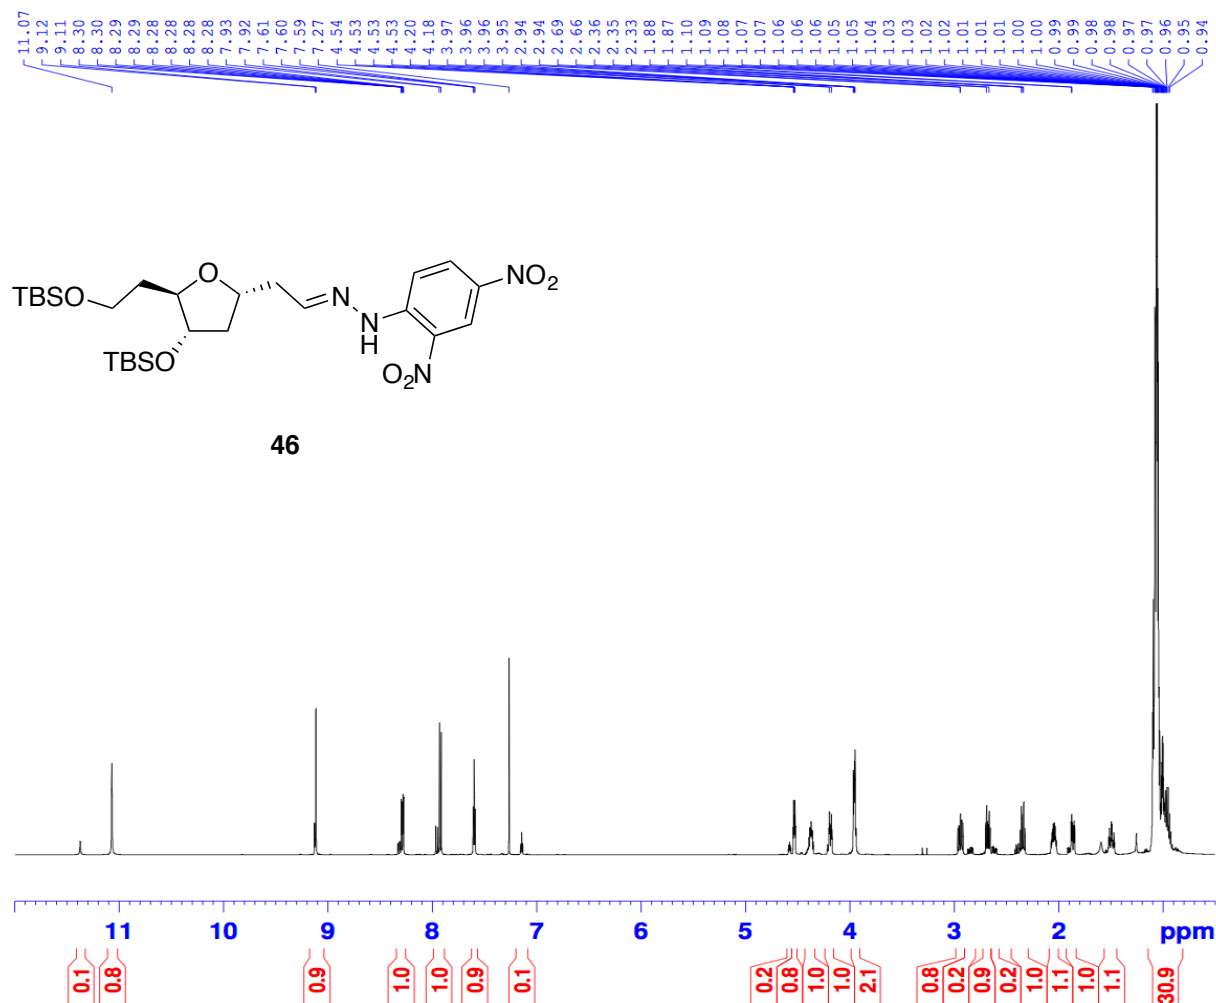

Current Data Parameters  
 NAME VIT-IV-24-A  
 EXPNO 1  
 PROCNO 1

F2 - Acquisition Parameters  
 Date\_ 20120926  
 Time 20.37  
 INSTRUM spect  
 PROBHD 5 mm PAQXI 1H/  
 PULPROG zg30  
 TD 65536  
 SOLVENT CDCl3  
 NS 8  
 DS 0  
 SWH 12335.526 Hz  
 FIDRES 0.188225 Hz  
 AQ 2.6564426 sec  
 RG 33.59  
 DW 40.533 usec  
 DE 6.50 usec  
 TE 298.2 K  
 D1 2.00000000 sec  
 TD0 1

===== CHANNEL f1 =====  
 NUC1 1H  
 P1 9.79 usec  
 PLW1 9.30000019 W  
 SFO1 600.1937064 MHz

F2 - Processing parameters  
 SI 65536  
 SF 600.1900105 MHz  
 WDW EM  
 SSB 0  
 LB 0.30 Hz  
 GB 0  
 PC 1.00

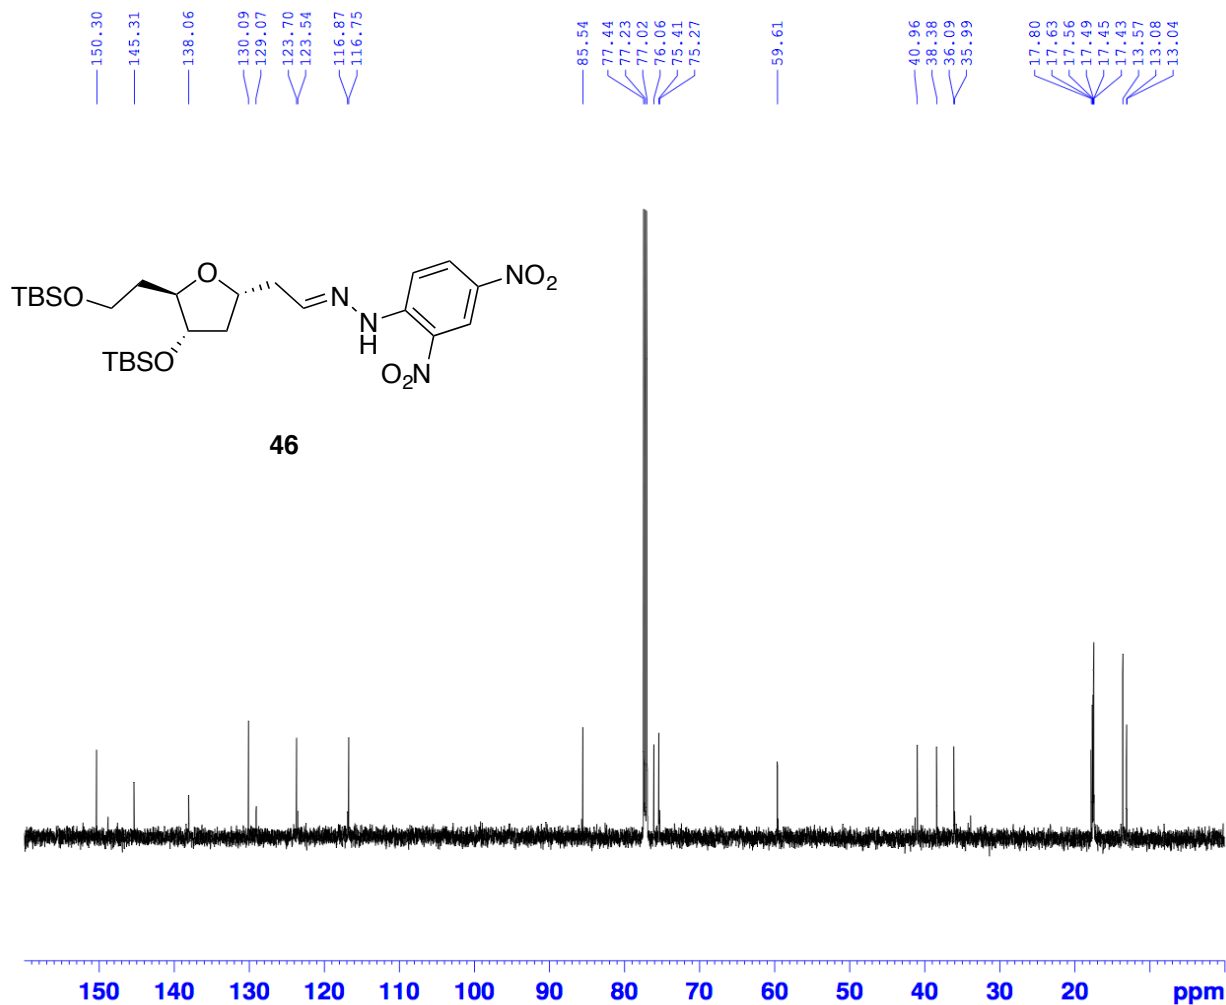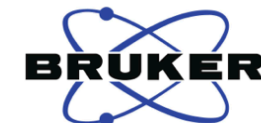

Current Data Parameters  
 NAME VIT-IV-24-A  
 EXPNO 2  
 PROCNO 1

F2 - Acquisition Parameters  
 Date\_ 20120926  
 Time 20.40  
 INSTRUM spect  
 PROBHD 5 mm PAQXI 1H/  
 PULPROG zgpg30  
 TD 65536  
 SOLVENT CDCl3  
 NS 128  
 DS 0  
 SWH 36057.691 Hz  
 FIDRES 0.550197 Hz  
 AQ 0.9088159 sec  
 RG 184.65  
 DW 13.867 usec  
 DE 6.50 usec  
 TE 298.1 K  
 D1 2.5000000 sec  
 D11 0.03000000 sec  
 TD0 1

===== CHANNEL f1 =====  
 NUC1 13C  
 P1 15.00 usec  
 PLW1 106.0000000 W  
 SFO1 150.9329866 MHz

===== CHANNEL f2 =====  
 CPDPRG2 waltz16  
 NUC2 1H  
 PCPD2 70.00 usec  
 PLW2 9.30000019 W  
 PLW12 0.18190999 W  
 PLW13 0.08913500 W  
 SFO2 600.1924008 MHz

F2 - Processing parameters  
 SI 32768  
 SF 150.9178644 MHz  
 WDW EM  
 SSB 0  
 LB 1.00 Hz  
 GB 0  
 PC 1.40

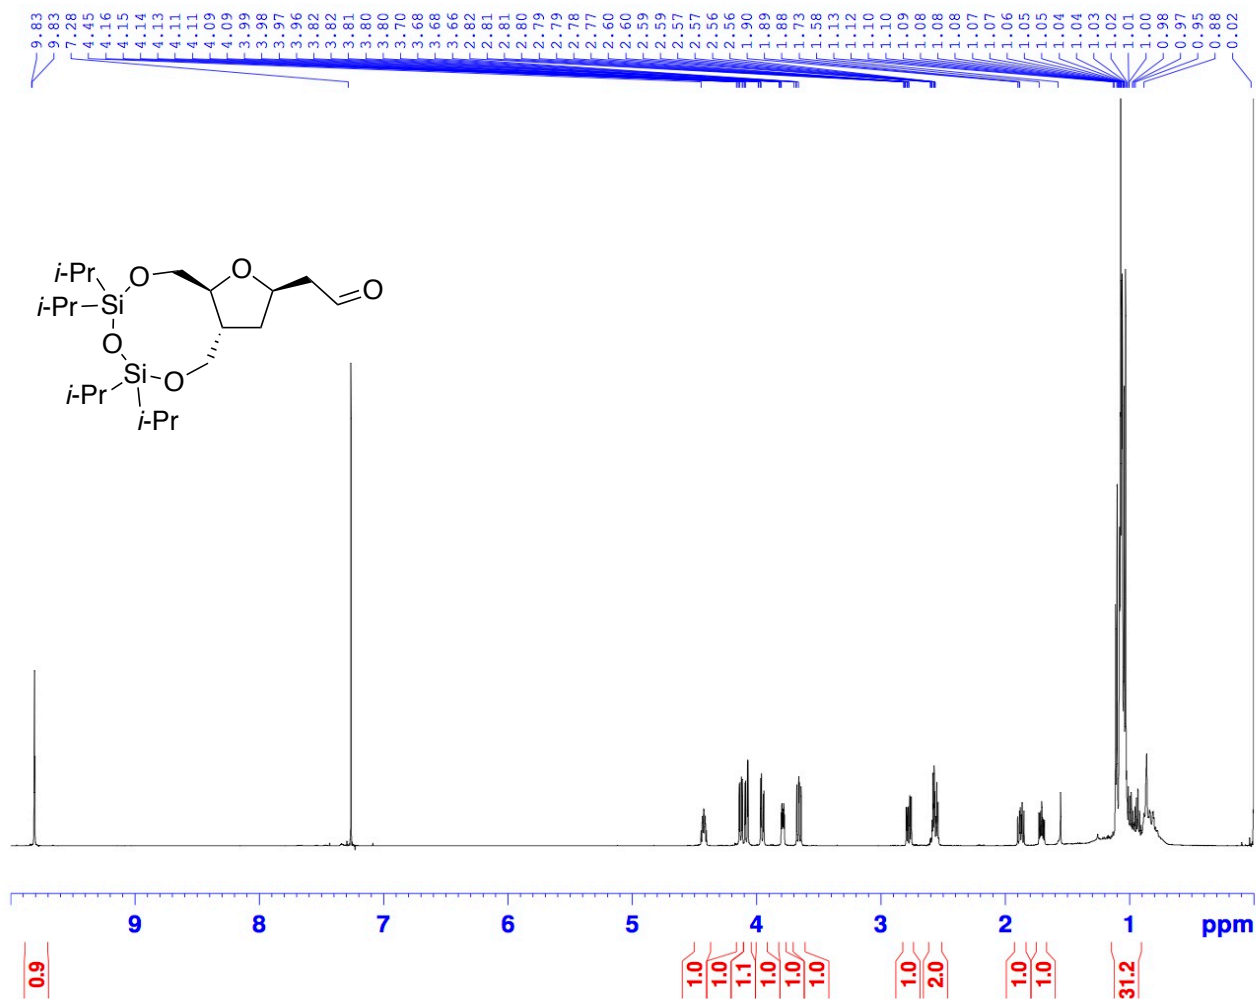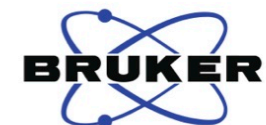

Current Data Parameters  
 NAME VIT-IV-32-A  
 EXPNO 1  
 PROCNO 1

F2 - Acquisition Parameters  
 Date\_ 20121022  
 Time 10.49  
 INSTRUM spect  
 PROBHD 5 mm PAQXI 1H/  
 PULPROG zg30  
 TD 65536  
 SOLVENT CDCl3  
 NS 8  
 DS 0  
 SWH 12335.526 Hz  
 FIDRES 0.188225 Hz  
 AQ 2.6564426 sec  
 RG 92.46  
 DW 40.533 usec  
 DE 6.50 usec  
 TE 298.2 K  
 D1 2.00000000 sec  
 TD0 1

----- CHANNEL f1 -----  
 NUC1 1H  
 P1 9.79 usec  
 PLW1 9.30000019 W  
 SFO1 600.1937064 MHz

F2 - Processing parameters  
 SI 65536  
 SF 600.1900129 MHz  
 WDW EM  
 SSB 0  
 LB 0.30 Hz  
 GB 0  
 PC 1.00

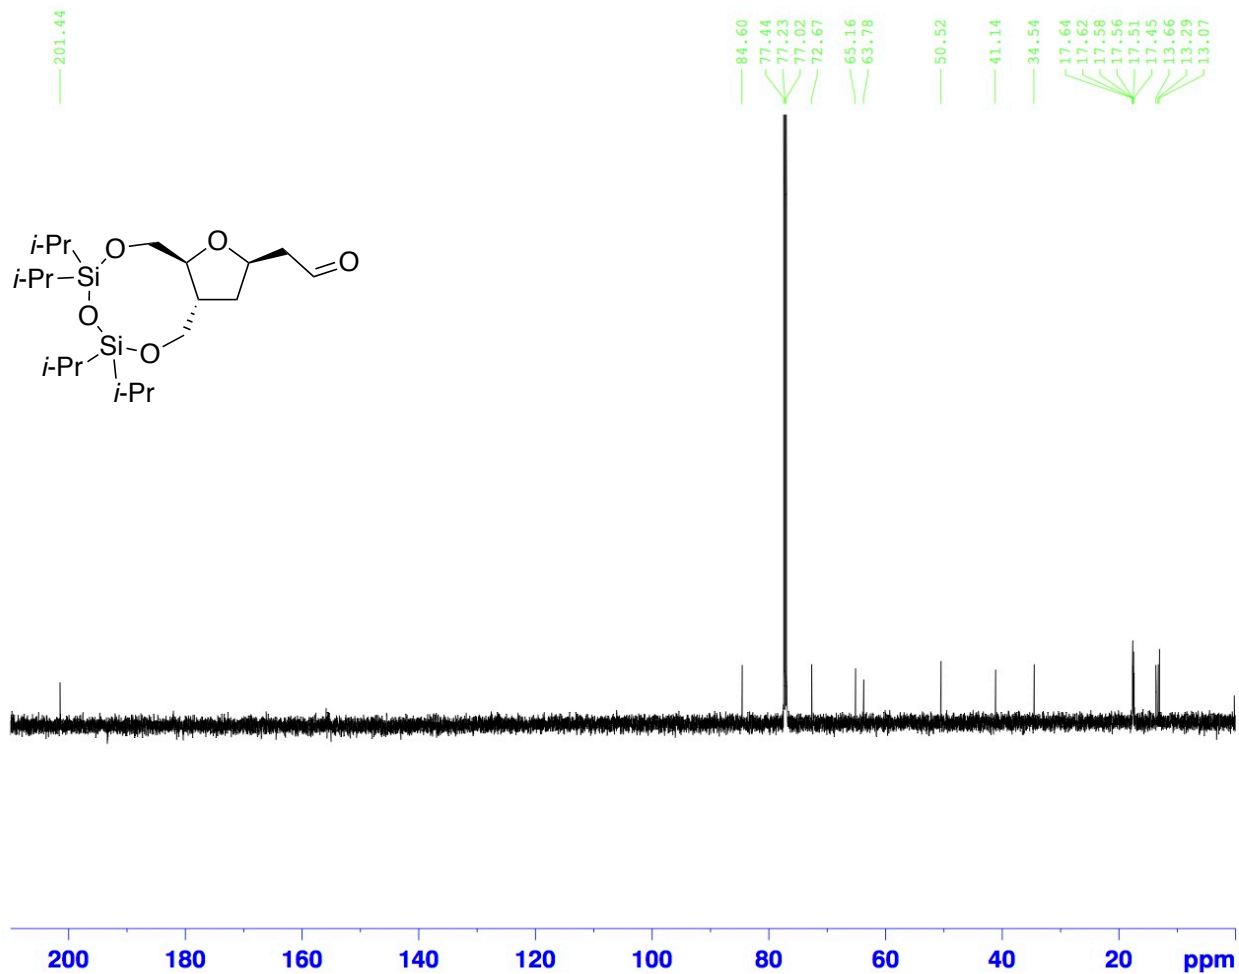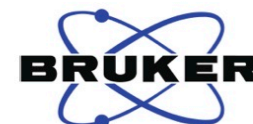

Current Data Parameters  
 NAME VIT-IV-32-A  
 EXPNO 2  
 PROCNO 1

F2 - Acquisition Parameters  
 Date\_ 20121022  
 Time 10.50  
 INSTRUM spect  
 PROBHD 5 mm PAQXI 1H/  
 PULPROG zgpg30  
 TD 65536  
 SOLVENT CDC13  
 NS 128  
 DS 0  
 SWH 36057.691 Hz  
 FIDRES 0.550197 Hz  
 AQ 0.9088159 sec  
 RG 184.65  
 DW 13.867 usec  
 DE 6.50 usec  
 TE 298.2 K  
 D1 2.00000000 sec  
 D11 0.03000000 sec  
 TD0 1

===== CHANNEL f1 =====  
 NUC1 13C  
 P1 15.00 usec  
 PLW1 106.00000000 W  
 SFO1 150.9329866 MHz

===== CHANNEL f2 =====  
 CPDPRG2 waltz16  
 NUC2 1H  
 PCPD2 70.00 usec  
 PLW2 9.30000019 W  
 PLW12 0.18190999 W  
 PLW13 0.08913500 W  
 SFO2 600.1924008 MHz

F2 - Processing parameters  
 SI 32768  
 SF 150.9178634 MHz  
 WDW EM  
 SSB 0  
 LB 1.00 Hz  
 GB 0  
 PC 1.40

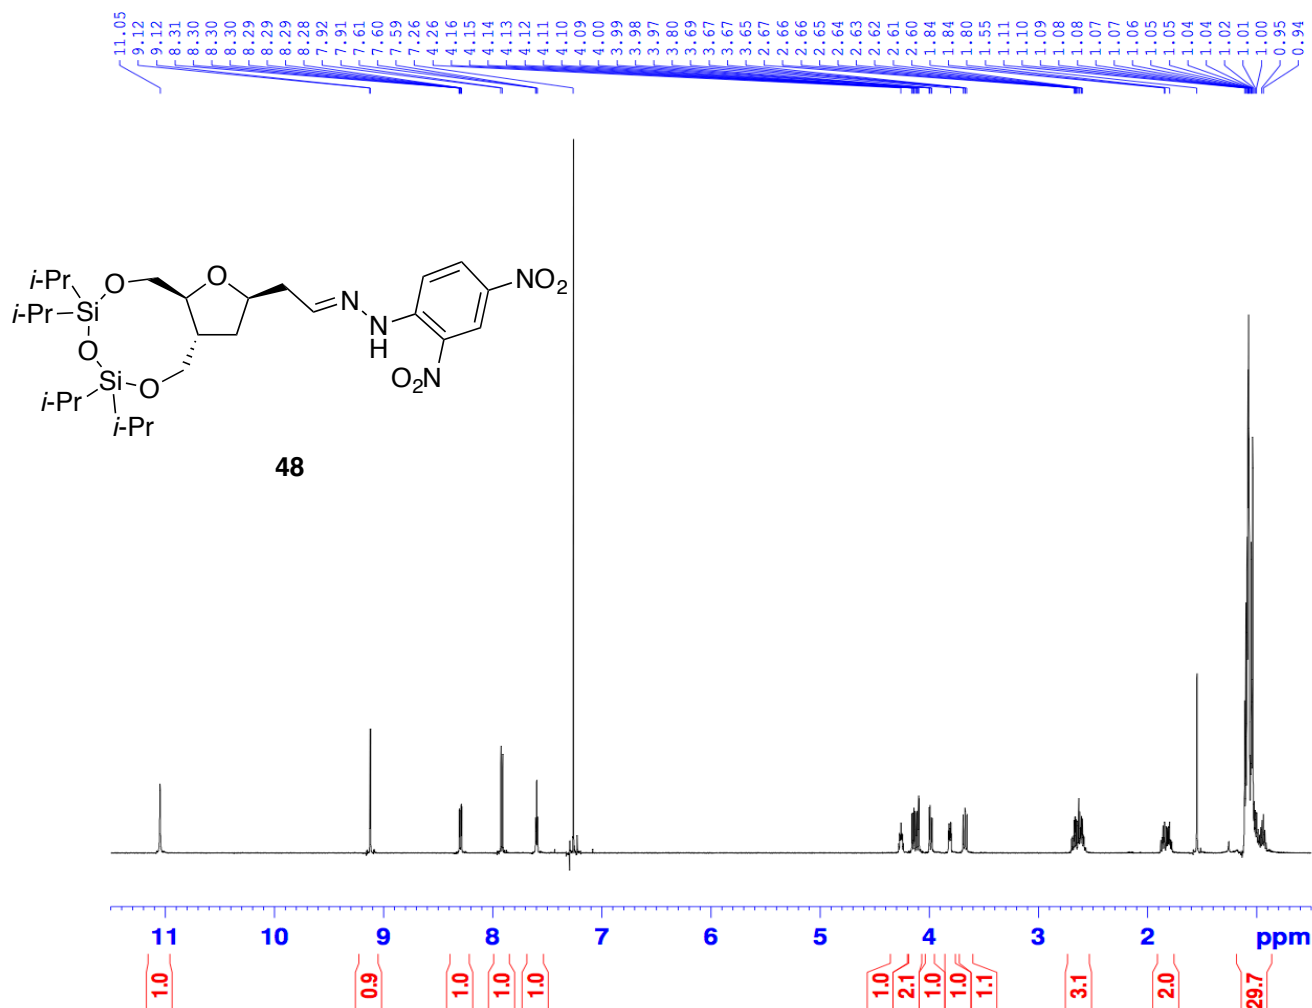

Current Data Parameters  
 NAME VIT-III-12-A  
 EXPNO 2  
 PROCNO 1

F2 - Acquisition Parameters  
 Date\_ 20120331  
 Time 17.46  
 INSTRUM spect  
 PROBHD 5 mm PAQXI 1H/  
 PULPROG zg30  
 TD 65536  
 SOLVENT CDCl3  
 NS 8  
 DS 0  
 SWH 12335.526 Hz  
 FIDRES 0.188225 Hz  
 AQ 2.6564426 sec  
 RG 164.46  
 DW 40.533 usec  
 DE 6.50 usec  
 TE 298.1 K  
 D1 1.0000000 sec  
 TD0 1

===== CHANNEL f1 =====  
 NUC1 1H  
 P1 9.79 usec  
 PLW1 9.3000019 W  
 SFO1 600.1937064 MHz

F2 - Processing parameters  
 SI 65536  
 SF 600.1900136 MHz  
 WDW EM  
 SSB 0  
 LB 0.30 Hz  
 GB 0  
 PC 1.00

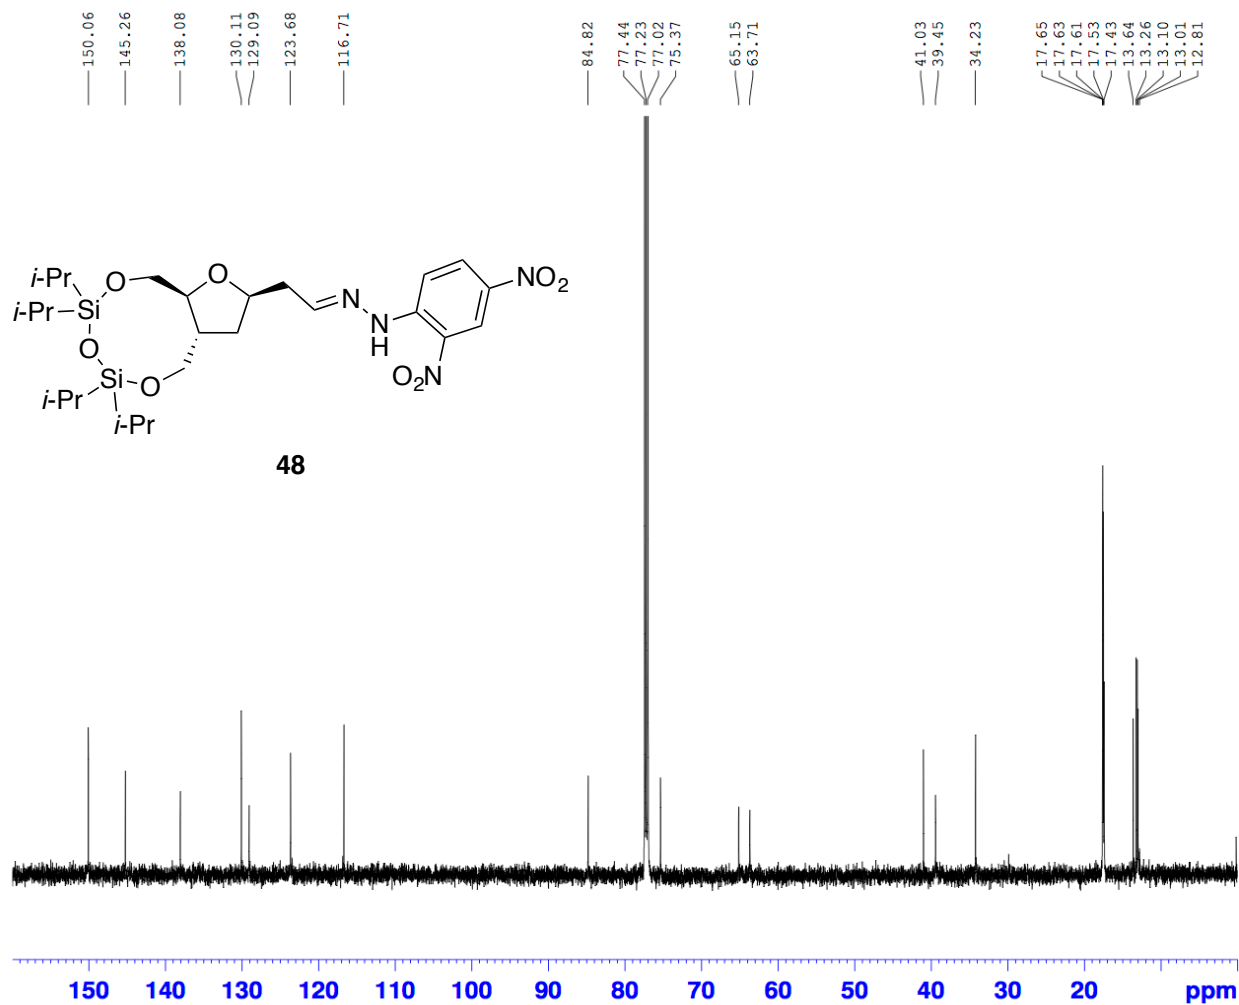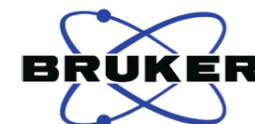

Current Data Parameters  
 NAME VIT-III-12-A  
 EXPNO 7  
 PROCNO 1

F2 - Acquisition Parameters  
 Date\_ 20121023  
 Time 23.27  
 INSTRUM spect  
 PROBHD 5 mm PAQXI 1H/  
 PULPROG zgpg30  
 TD 65536  
 SOLVENT CDCl3  
 NS 256  
 DS 0  
 SWH 36057.691 Hz  
 FIDRES 0.550197 Hz  
 AQ 0.9088159 sec  
 RG 184.65  
 DW 13.867 usec  
 DE 6.50 usec  
 TE 298.1 K  
 D1 2.50000000 sec  
 D11 0.03000000 sec  
 TD0 1

===== CHANNEL f1 =====  
 NUC1 13C  
 P1 15.00 usec  
 PLW1 106.00000000 W  
 SFO1 150.9329866 MHz

===== CHANNEL f2 =====  
 CPDPRG2 waltz16  
 NUC2 1H  
 PCPD2 70.00 usec  
 PLW2 9.30000019 W  
 PLW12 0.18190999 W  
 PLW13 0.08913500 W  
 SFO2 600.1924008 MHz

F2 - Processing parameters  
 SI 32768  
 SF 150.9178660 MHz  
 WDW EM  
 SSB 0  
 LB 1.00 Hz  
 GB 0  
 PC 1.40

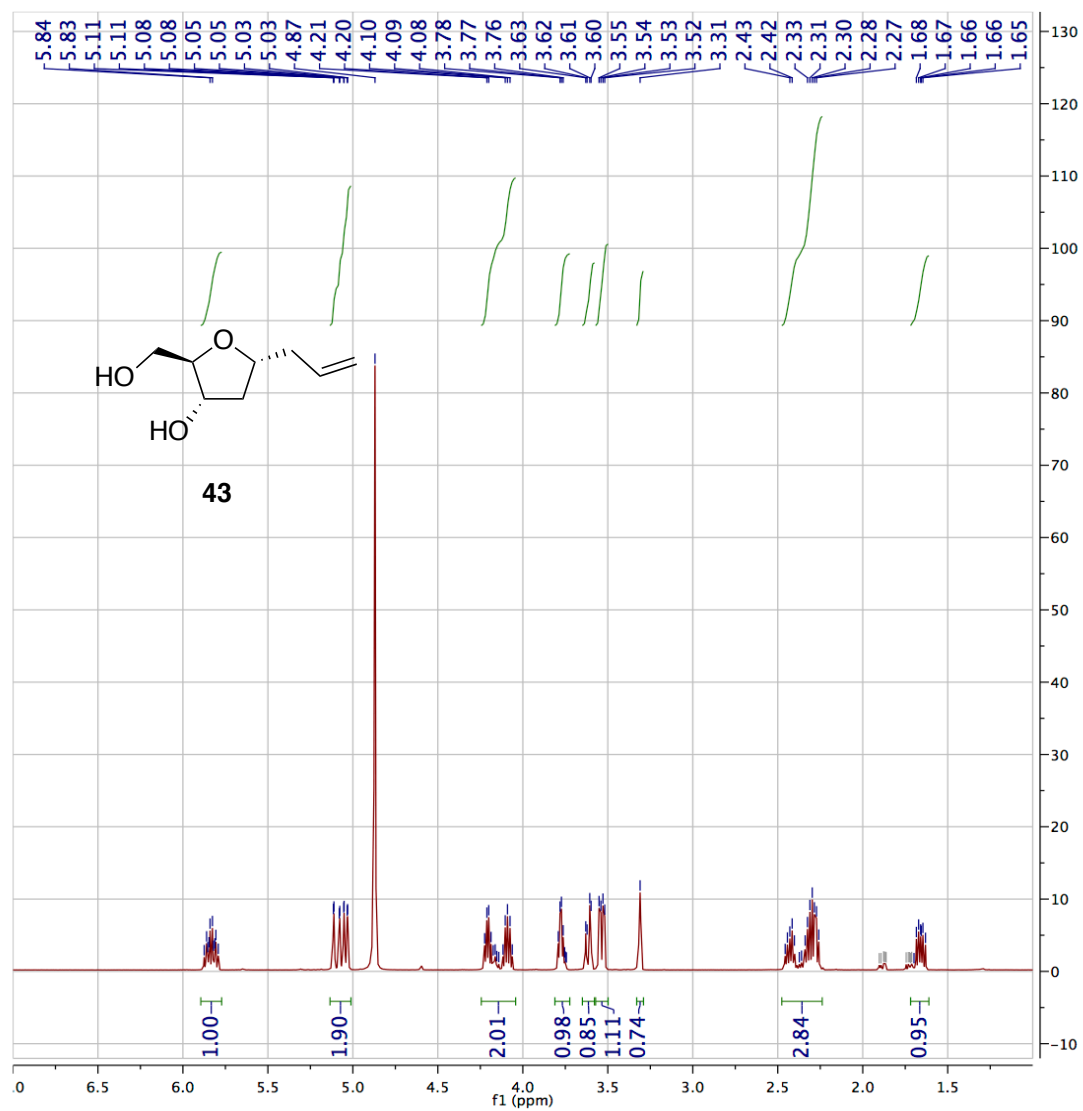

| Parameter                    | Value                                                  |
|------------------------------|--------------------------------------------------------|
| 1 Solvent                    | C6D6                                                   |
| 2 Temperature                | 298.0                                                  |
| 3 Pulse Sequence             | zg30                                                   |
| 4 Experiment                 | 1D                                                     |
| 5 Probe                      | 5 mm CPTCI<br>1H-13C/ 15N/<br>2H Z-GRD<br>Z44881/ 0020 |
| 6 Number of Scans            | 8                                                      |
| 7 Receiver Gain              | 5                                                      |
| 8 Relaxation Delay           | 0.1000                                                 |
| 9 Pulse Width                | 7.5000                                                 |
| 10 Spectrometer<br>Frequency | 500.22                                                 |
| 11 Spectral Width            | 8012.8                                                 |
| 12 Lowest Frequency          | -523.8                                                 |
| 13 Nucleus                   | 1H                                                     |
| 14 Acquired Size             | 40864                                                  |
| 15 Spectral Size             | 131072                                                 |

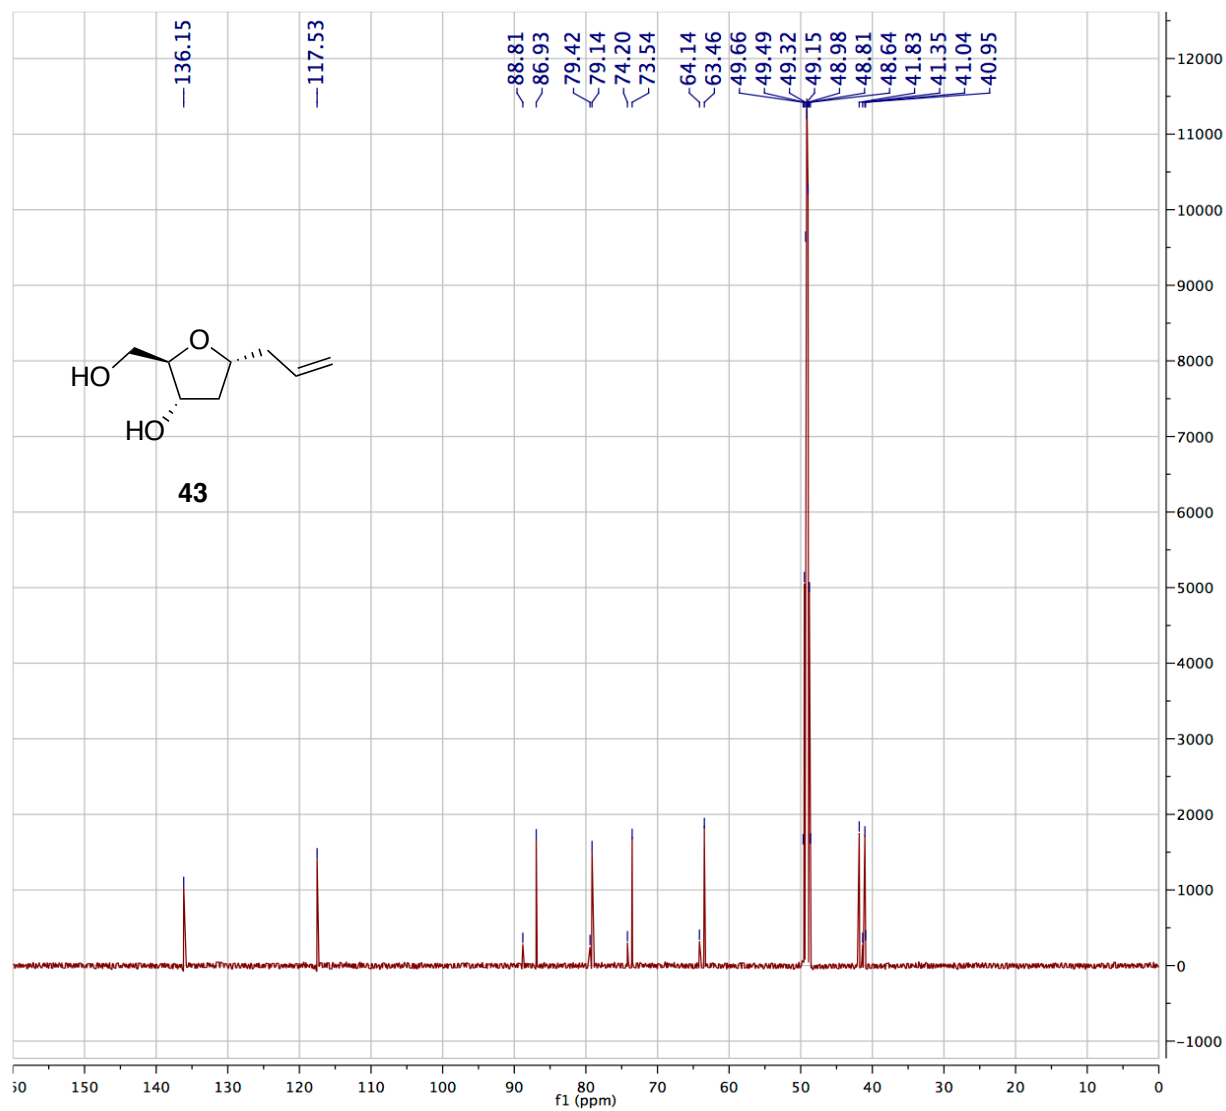

| Parameter                 | Value                                                  |
|---------------------------|--------------------------------------------------------|
| 1 Solvent                 | CDCl3                                                  |
| 2 Temperature             | 298.0                                                  |
| 3 Pulse Sequence          | SpinEchopg30g<br>p.prd                                 |
| 4 Experiment              | 1D                                                     |
| 5 Probe                   | 5 mm CPTCI<br>1H-13C/ 15N/<br>2H Z-GRD<br>Z44881/ 0020 |
| 6 Number of Scans         | 171                                                    |
| 7 Receiver Gain           | 7298                                                   |
| 8 Relaxation Delay        | 0.2500                                                 |
| 9 Pulse Width             | 15.5000                                                |
| 10 Spectrometer Frequency | 125.79                                                 |
| 11 Spectral Width         | 30303.0                                                |
| 12 Lowest Frequency       | -1122.7                                                |
| 13 Nucleus                | 13C                                                    |
| 14 Acquired Size          | 32768                                                  |
| 15 Spectral Size          | 65536                                                  |



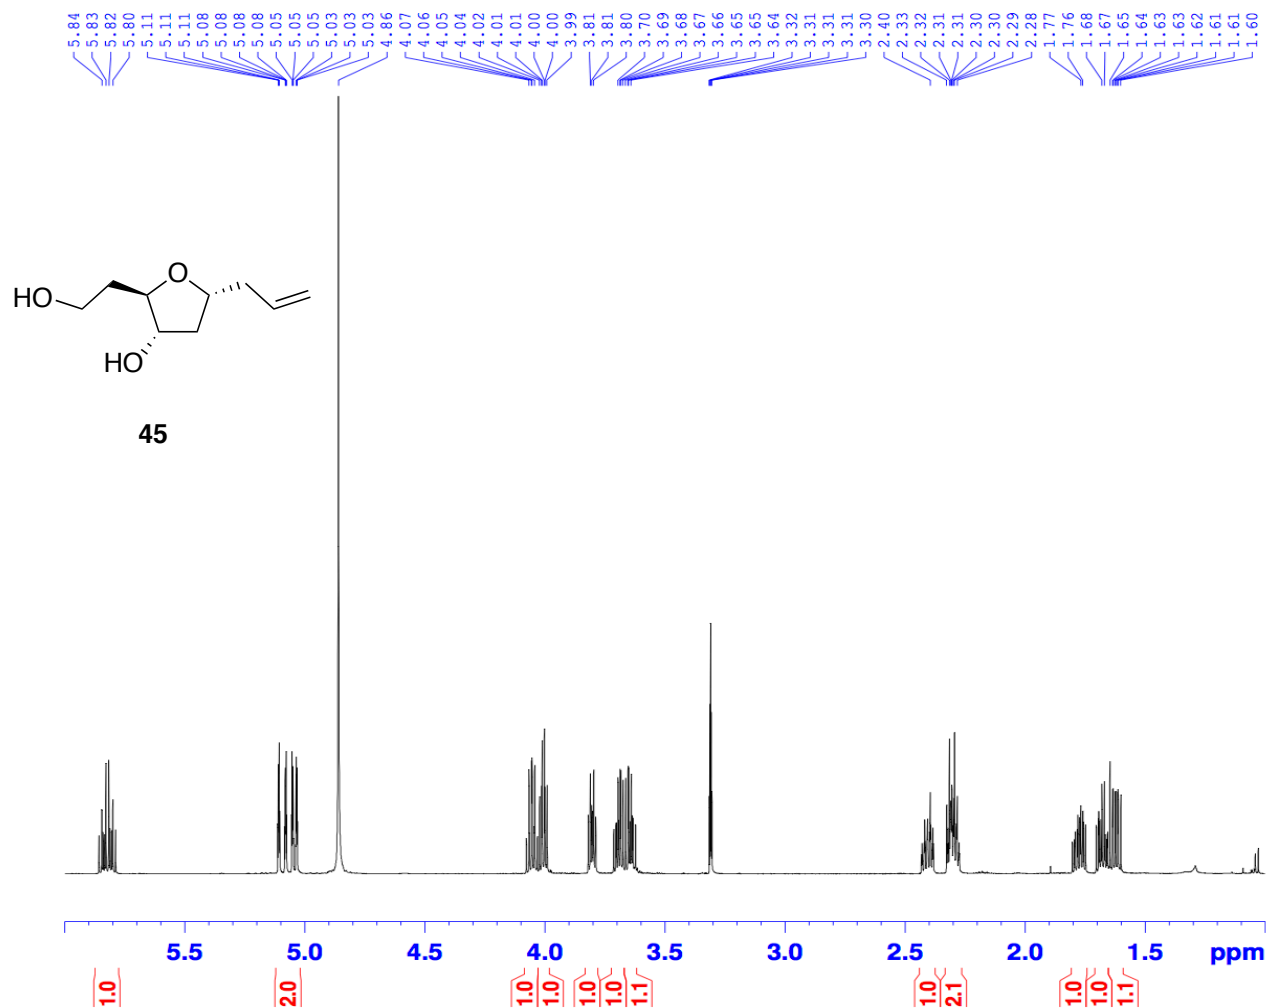

Current Data Parameters  
NAME VIT-IV-3-A  
EXPNO 5  
PROCNO 1

F2 - Acquisition Parameters  
Date\_ 20120828  
Time 16.16  
INSTRUM spect  
PROBHD 5 mm PABBO BB/  
PULPROG zg30  
TD 65536  
SOLVENT MeOD  
NS 8  
DS 0  
SWH 12335.526 Hz  
FIDRES 0.188225 Hz  
AQ 2.6564426 sec  
RG 92.46  
DW 40.533 usec  
DE 6.50 usec  
TE 298.2 K  
D1 2.00000000 sec  
TD0 1

===== CHANNEL f1 =====  
NUC1 1H  
P1 11.00 usec  
PLW1 26.50000000 W  
SFO1 600.1937064 MHz

F2 - Processing parameters  
SI 65536  
SF 600.1900118 MHz  
WDW no  
SSB 0  
LB 0 Hz  
GB 0  
PC 1.00

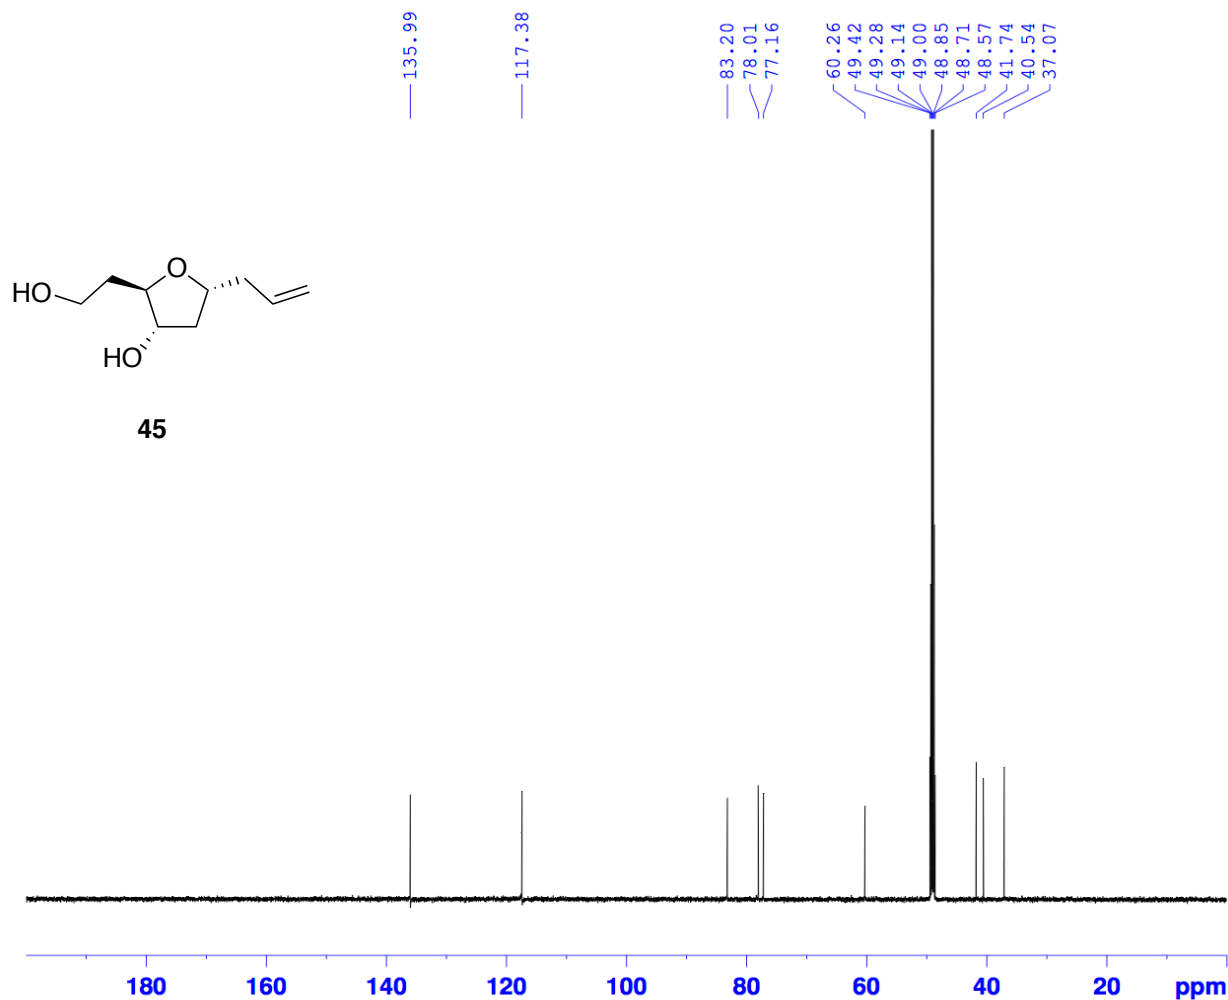

Current Data Parameters  
 NAME VTT-IV-3-A  
 EXPNO 6  
 PROCNO 1

F2 - Acquisition Parameters  
 Date\_ 20120828  
 Time 16.18  
 INSTRUM spect  
 PROBHD 5 mm PABBO BB/  
 PULPROG zgpg30  
 TD 65536  
 SOLVENT MeOD  
 NS 128  
 DS 0  
 SWH 36057.691 Hz  
 FIDRES 0.550197 Hz  
 AQ 0.9088159 sec  
 RG 184.65  
 DW 13.867 usec  
 DE 6.50 usec  
 TE 298.2 K  
 D1 2.5000000 sec  
 D11 0.0300000 sec  
 TD0 1

===== CHANNEL f1 =====  
 NUC1 13C  
 P1 10.65 usec  
 PLW1 104.0000000 W  
 SFO1 150.9329866 MHz

===== CHANNEL f2 =====  
 CPDPRG2 waltz16  
 NUC2 1H  
 PCPD2 70.00 usec  
 PLW2 26.5000000 W  
 PLW12 0.65438998 W  
 PLW13 0.32065001 W  
 SFO2 600.1924008 MHz

F2 - Processing parameters  
 SI 32768  
 SF 150.9176859 MHz  
 WDW EM  
 SSB 0  
 LB 1.00 Hz  
 GB 0  
 PC 1.40

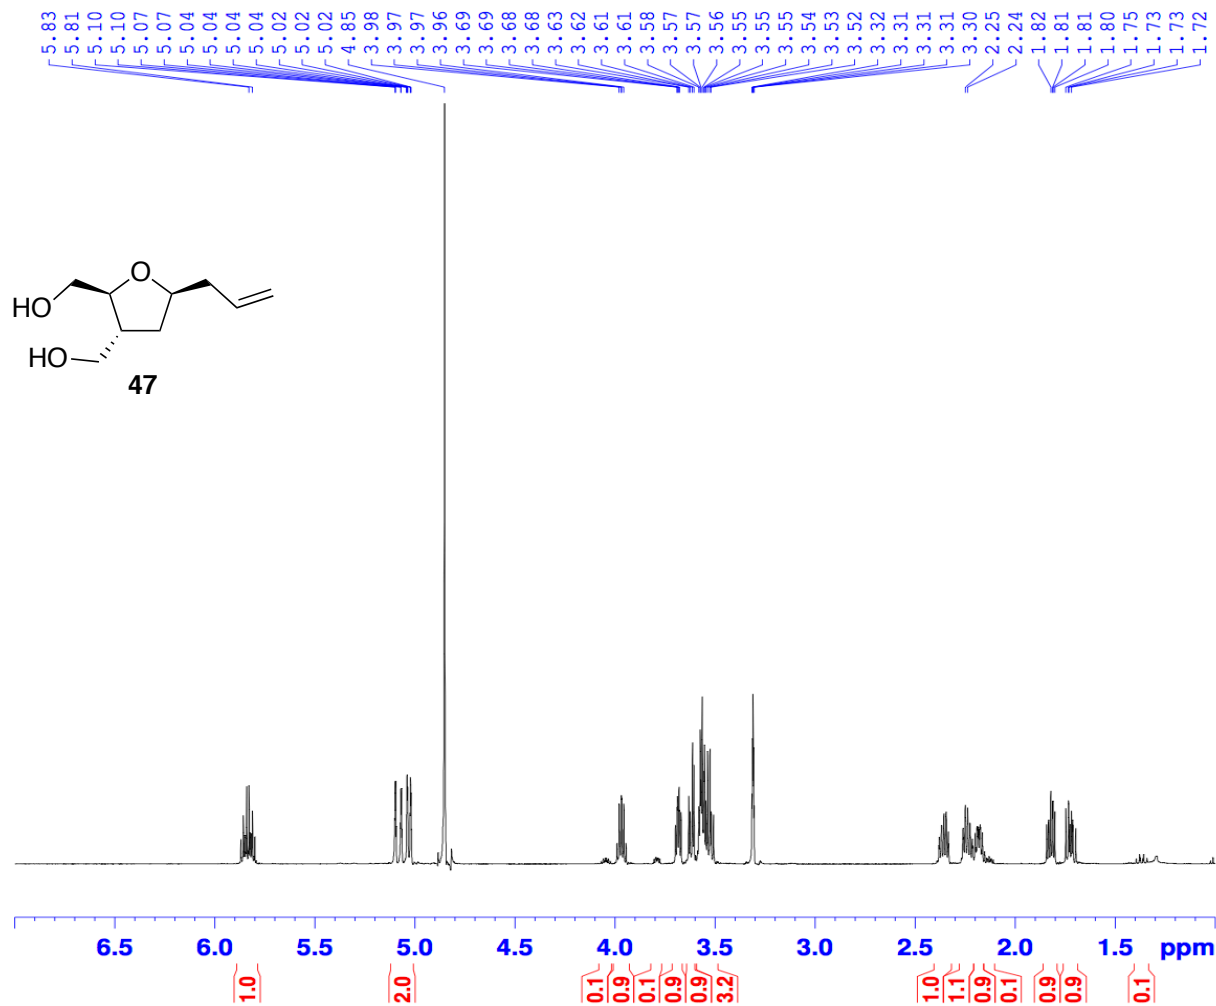

Current Data Parameters  
NAME VIT-IV-46-A  
EXPNO 1  
PROCNO 1

F2 - Acquisition Parameters  
Date\_ 20121123  
Time 14.41  
INSTRUM spect  
PROBHD 5 mm PAQXI 1H/  
PULPROG zg30  
TD 65536  
SOLVENT MeOD  
NS 8  
DS 0  
SWH 12335.526 Hz  
FIDRES 0.188225 Hz  
AQ 2.6564426 sec  
RG 113.19  
DW 40.533 usec  
DE 6.50 usec  
TE 298.2 K  
D1 2.00000000 sec  
TD0 1

===== CHANNEL f1 =====  
NUC1 1H  
P1 9.79 usec  
PLW1 9.3000019 W  
SFO1 600.1937064 MHz

F2 - Processing parameters  
SI 65536  
SF 600.1900114 MHz  
WDW EM  
SSB 0  
LB 0.30 Hz  
GB 0  
PC 1.00

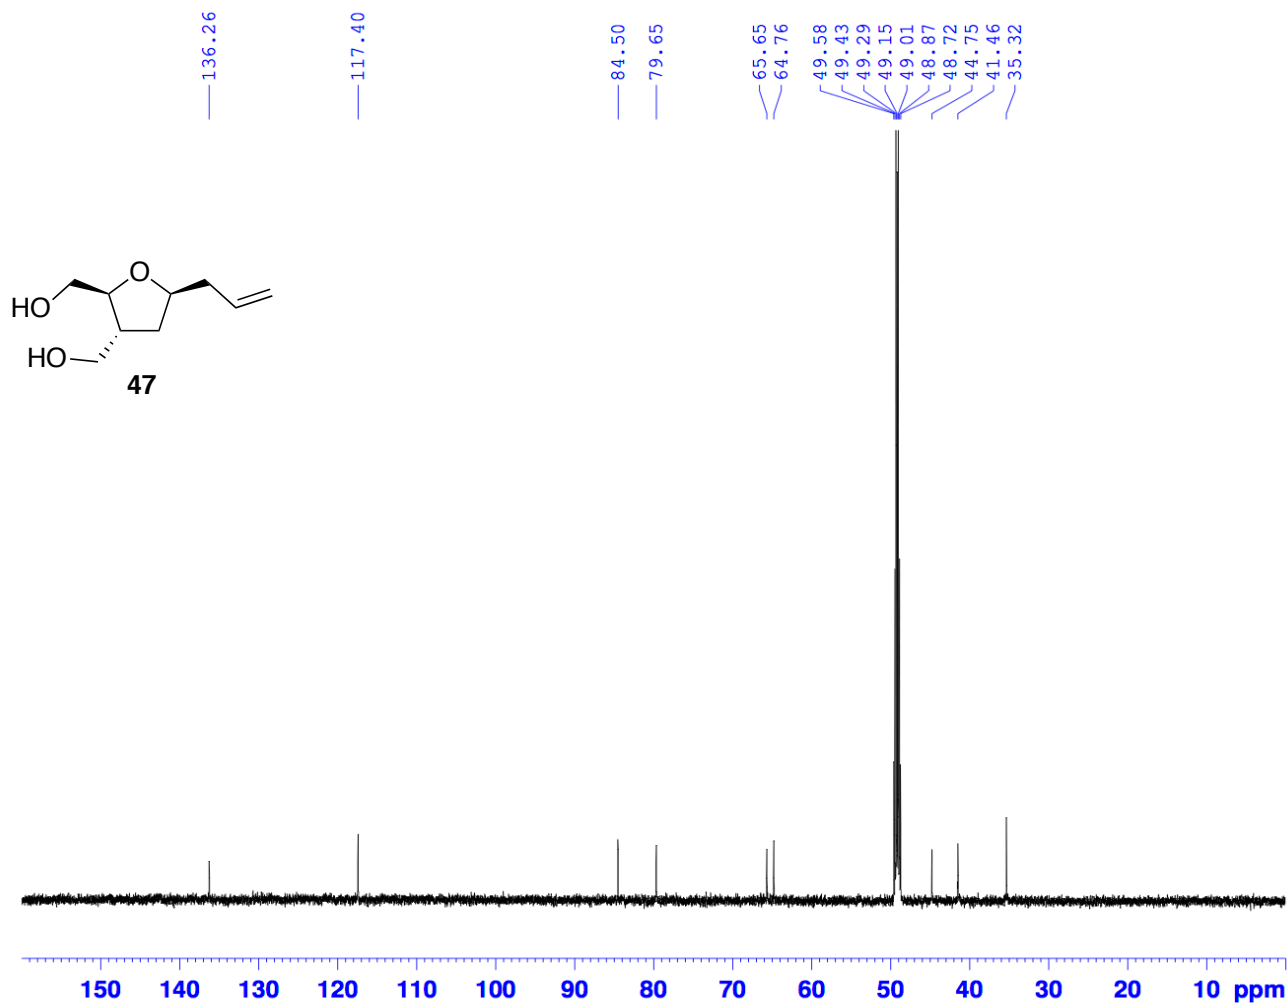

Current Data Parameters  
 NAME VTT-IV-46-A  
 EXPNO 2  
 PROCNO 1

F2 - Acquisition Parameters  
 Date\_ 20121124  
 Time 16.46  
 INSTRUM spect  
 PROBHD 5 mm PAQXI 1H/  
 PULPROG zgpg30  
 TD 65536  
 SOLVENT CDCl3  
 NS 128  
 DS 0  
 SWH 36057.691 Hz  
 FIDRES 0.550197 Hz  
 AQ 0.9088159 sec  
 RG 184.65  
 DW 13.867 usec  
 DE 6.50 usec  
 TE 298.2 K  
 D1 2.50000000 sec  
 D11 0.03000000 sec  
 TD0 1

===== CHANNEL f1 =====  
 NUC1 13C  
 P1 15.00 usec  
 PLW1 106.00000000 W  
 SFO1 150.9329866 MHz

===== CHANNEL f2 =====  
 CPDPRG2 waltz16  
 NUC2 1H  
 PCPD2 70.00 usec  
 PLW2 9.30000019 W  
 PLW12 0.18190999 W  
 PLW13 0.08913500 W  
 SFO2 600.1924008 MHz

F2 - Processing parameters  
 SI 32768  
 SF 150.9182567 MHz  
 WDW EM  
 SSB 0  
 LB 1.00 Hz  
 GB 0  
 PC 1.40
